# Supplementary material
Source: MDPI journal article supplement (https://www.mdpi.com/2073-4352/13/6/861)
Supplement: s1 [file s1]

Archive with 3 entries (3 files):
- checkCIF_PLATON Pyr_DPA.pdf
- Pyr_DPA_PDV24_ccdc.cif
- SI_crystals-2387156.pdf
