# Supplementary material
Source: MDPI journal article supplement (https://www.mdpi.com/2073-4352/13/6/861)
Supplement: s1 [file s1 › Pyr_DPA_PDV24_ccdc.cif]

data_pyr_dpa_pdv24
_audit_creation_date               2023-04-20
_audit_creation_method
;
Olex2 1.5
(compiled 2022.04.07 svn.rca3783a0 for OlexSys, GUI svn.r6498)
;
_shelx_SHELXL_version_number       '2018/3'
_audit_contact_author_address      ?
_audit_contact_author_email        ?
_audit_contact_author_name         ''
_audit_contact_author_phone        ?
_publ_contact_author_id_orcid      ?
_publ_section_references
;
Dolomanov, O.V., Bourhis, L.J., Gildea, R.J, Howard, J.A.K. & Puschmann, H.
 (2009), J. Appl. Cryst. 42, 339-341.

Sheldrick, G.M. (2015). Acta Cryst. C71, 3-8.
;
_chemical_name_common              ?
_chemical_name_systematic          ?
_chemical_formula_moiety           'C26 H18, C16 H10'
_chemical_formula_sum              'C42 H28'
_chemical_formula_weight           532.64
_chemical_melting_point            ?
loop_
  _atom_type_symbol
  _atom_type_description
  _atom_type_scat_dispersion_real
  _atom_type_scat_dispersion_imag
  _atom_type_scat_source
 'C' 'C' 0.0033 0.0016 'International Tables Vol C Tables 4.2.6.8 and 6.1.1.4'
 'H' 'H' 0.0000 0.0000 'International Tables Vol C Tables 4.2.6.8 and 6.1.1.4'

_shelx_space_group_comment
;
The symmetry employed for this shelxl refinement is uniquely defined
by the following loop, which should always be used as a source of
symmetry information in preference to the above space-group names.
They are only intended as comments.
;
_space_group_crystal_system        'monoclinic'
_space_group_IT_number             14
_space_group_name_H-M_alt          'P 1 21/c 1'
_space_group_name_Hall             '-P 2ybc'
loop_
  _space_group_symop_operation_xyz
 'x, y, z'
 '-x, y+1/2, -z+1/2'
 '-x, -y, -z'
 'x, -y-1/2, z-1/2'

_cell_length_a                     16.4311(10)
_cell_length_b                     8.0300(3)
_cell_length_c                     11.2057(7)
_cell_angle_alpha                  90
_cell_angle_beta                   104.651(2)
_cell_angle_gamma                  90
_cell_volume                       1430.42(14)
_cell_formula_units_Z              2
_cell_measurement_reflns_used      4409
_cell_measurement_temperature      296.15
_cell_measurement_theta_max        27.55
_cell_measurement_theta_min        2.56
_shelx_estimated_absorpt_T_max     0.998
_shelx_estimated_absorpt_T_min     0.943
_exptl_absorpt_coefficient_mu      0.070
_exptl_absorpt_correction_T_max    0.8621
_exptl_absorpt_correction_T_min    0.7666
_exptl_absorpt_correction_type     multi-scan
_exptl_absorpt_process_details
;
SADABS-2016/2 (Bruker,2016/2) was used for absorption correction.
wR2(int) was 0.0922 before and 0.0561 after correction.
The Ratio of minimum to maximum transmission is 0.8892.
The \l/2 correction factor is Not present.
;
_exptl_absorpt_special_details     ?
_exptl_crystal_colour              colourless
_exptl_crystal_colour_primary      colourless
_exptl_crystal_density_diffrn      1.237
_exptl_crystal_density_meas        ?
_exptl_crystal_density_method      ?
_exptl_crystal_description         plate
_exptl_crystal_F_000               560
_exptl_crystal_size_max            0.845
_exptl_crystal_size_mid            0.719
_exptl_crystal_size_min            0.03
_exptl_transmission_factor_max     ?
_exptl_transmission_factor_min     ?
_diffrn_reflns_av_R_equivalents    0.0466
_diffrn_reflns_av_unetI/netI       0.0359
_diffrn_reflns_Laue_measured_fraction_full  0.997
_diffrn_reflns_Laue_measured_fraction_max  0.994
_diffrn_reflns_limit_h_max         21
_diffrn_reflns_limit_h_min         -21
_diffrn_reflns_limit_k_max         10
_diffrn_reflns_limit_k_min         -6
_diffrn_reflns_limit_l_max         14
_diffrn_reflns_limit_l_min         -14
_diffrn_reflns_number              14194
_diffrn_reflns_point_group_measured_fraction_full  0.997
_diffrn_reflns_point_group_measured_fraction_max  0.994
_diffrn_reflns_theta_full          25.242
_diffrn_reflns_theta_max           27.103
_diffrn_reflns_theta_min           3.157
_diffrn_ambient_temperature        296.15
_diffrn_detector_area_resol_mean   ?
_diffrn_measured_fraction_theta_full  0.997
_diffrn_measured_fraction_theta_max  0.994
_diffrn_measurement_device_type    'Bruker APEX-II CCD'
_diffrn_measurement_method         '\f and \w scans'
_diffrn_radiation_type             MoK\a
_diffrn_radiation_wavelength       0.71073
_diffrn_source                     ?
_diffrn_standards_number           0
_reflns_Friedel_coverage           0.000
_reflns_Friedel_fraction_full      .
_reflns_Friedel_fraction_max       .
_reflns_number_gt                  2160
_reflns_number_total               3143
_reflns_special_details
;
 Reflections were merged by SHELXL according to the crystal
 class for the calculation of statistics and refinement.
 
 _reflns_Friedel_fraction is defined as the number of unique
 Friedel pairs measured divided by the number that would be
 possible theoretically, ignoring centric projections and
 systematic absences.
;
_reflns_threshold_expression       'I > 2\s(I)'
_computing_cell_refinement       'Bruker SAINT'
_computing_data_collection       'Bruker APEX2'
_computing_data_reduction        'Bruker SAINT'
_computing_molecular_graphics      'Olex2 1.5 (Dolomanov et al., 2009)'
_computing_publication_material    'Olex2 1.5 (Dolomanov et al., 2009)'
_computing_structure_refinement    'SHELXL 2018/3 (Sheldrick, 2015)'
_computing_structure_solution      'SHELXT 2014/5 (Sheldrick, 2014)'
_refine_diff_density_max           0.212
_refine_diff_density_min           -0.171
_refine_diff_density_rms           0.037
_refine_ls_extinction_coef         .
_refine_ls_extinction_method       none
_refine_ls_goodness_of_fit_ref     1.025
_refine_ls_hydrogen_treatment      constr
_refine_ls_matrix_type             full
_refine_ls_number_parameters       190
_refine_ls_number_reflns           3143
_refine_ls_number_restraints       0
_refine_ls_R_factor_all            0.0830
_refine_ls_R_factor_gt             0.0506
_refine_ls_restrained_S_all        1.025
_refine_ls_shift/su_max            0.000
_refine_ls_shift/su_mean           0.000
_refine_ls_structure_factor_coef   Fsqd
_refine_ls_weighting_details      
 'w=1/[\s^2^(Fo^2^)+(0.0551P)^2^+0.5736P] where P=(Fo^2^+2Fc^2^)/3'
_refine_ls_weighting_scheme        calc
_refine_ls_wR_factor_gt            0.1181
_refine_ls_wR_factor_ref           0.1434
_refine_special_details            ?
_olex2_refinement_description
;
1. Fixed Uiso
 At 1.2 times of:
  All C(H) groups
2.a Aromatic/amide H refined with riding coordinates:
 C5(H5), C4(H4), C3(H3), C2(H2), C9(H9), C10(H10), C11(H11), C12(H12),
 C13(H13), C14(H14), C15(H15), C17(H17), C18(H18), C19(H19)
;
_atom_sites_solution_hydrogens     geom
_atom_sites_solution_primary       ?
_atom_sites_solution_secondary     ?
loop_
  _atom_site_label
  _atom_site_type_symbol
  _atom_site_fract_x
  _atom_site_fract_y
  _atom_site_fract_z
  _atom_site_U_iso_or_equiv
  _atom_site_adp_type
  _atom_site_occupancy
  _atom_site_site_symmetry_order
  _atom_site_calc_flag
  _atom_site_refinement_flags_posn
  _atom_site_refinement_flags_adp
  _atom_site_refinement_flags_occupancy
  _atom_site_disorder_assembly
  _atom_site_disorder_group
 C6 C 1.00175(10) 0.62816(19) 1.08721(14) 0.0330(4) Uani 1 1 d . . . . .
 C5 C 1.00613(11) 0.7525(2) 1.17989(16) 0.0434(4) Uani 1 1 d . . . . .
 H5 H 0.962132 0.827906 1.171812 0.052 Uiso 1 1 calc R U . . .
 C4 C 1.07306(12) 0.7627(2) 1.27934(17) 0.0490(5) Uani 1 1 d . . . . .
 H4 H 1.074094 0.843973 1.338851 0.059 Uiso 1 1 calc R U . . .
 C3 C 1.14111(11) 0.6512(2) 1.29324(17) 0.0478(5) Uani 1 1 d . . . . .
 H3 H 1.186857 0.659853 1.361563 0.057 Uiso 1 1 calc R U . . .
 C2 C 1.14026(10) 0.5316(2) 1.20772(16) 0.0400(4) Uani 1 1 d . . . . .
 H2 H 1.185744 0.459294 1.218227 0.048 Uiso 1 1 calc R U . . .
 C1 C 1.07105(9) 0.5140(2) 1.10174(14) 0.0327(4) Uani 1 1 d . . . . .
 C7 C 1.06819(9) 0.38739(19) 1.01410(14) 0.0327(4) Uani 1 1 d . . . . .
 C8 C 1.14032(10) 0.2684(2) 1.03076(15) 0.0362(4) Uani 1 1 d . . . . .
 C9 C 1.20958(11) 0.3049(2) 0.98639(19) 0.0500(5) Uani 1 1 d . . . . .
 H9 H 1.210957 0.403649 0.943630 0.060 Uiso 1 1 calc R U . . .
 C10 C 1.27696(12) 0.1956(3) 1.0051(2) 0.0591(6) Uani 1 1 d . . . . .
 H10 H 1.323163 0.221687 0.974848 0.071 Uiso 1 1 calc R U . . .
 C11 C 1.27591(12) 0.0501(3) 1.0674(2) 0.0587(6) Uani 1 1 d . . . . .
 H11 H 1.321461 -0.022439 1.080516 0.070 Uiso 1 1 calc R U . . .
 C12 C 1.20739(14) 0.0114(3) 1.1106(2) 0.0632(6) Uani 1 1 d . . . . .
 H12 H 1.206190 -0.088222 1.152464 0.076 Uiso 1 1 calc R U . . .
 C13 C 1.13982(12) 0.1199(2) 1.09228(19) 0.0528(5) Uani 1 1 d . . . . .
 H13 H 1.093540 0.092241 1.121852 0.063 Uiso 1 1 calc R U . . .
 C14 C 0.58963(13) 0.5909(3) 0.70861(19) 0.0592(6) Uani 1 1 d . . . . .
 H14 H 0.628621 0.599387 0.784653 0.071 Uiso 1 1 calc R U . . .
 C15 C 0.53955(14) 0.7206(3) 0.6668(2) 0.0599(6) Uani 1 1 d . . . . .
 H15 H 0.543974 0.816038 0.714970 0.072 Uiso 1 1 calc R U . . .
 C16 C 0.47910(12) 0.7161(3) 0.54929(19) 0.0514(5) Uani 1 1 d . . . . .
 C17 C 0.42624(15) 0.8497(3) 0.5020(2) 0.0661(6) Uani 1 1 d . . . . .
 H17 H 0.429018 0.946635 0.548190 0.079 Uiso 1 1 calc R U . . .
 C18 C 0.37001(15) 0.8397(3) 0.3876(3) 0.0727(7) Uani 1 1 d . . . . .
 H18 H 0.335560 0.930130 0.357483 0.087 Uiso 1 1 calc R U . . .
 C19 C 0.36442(13) 0.6977(3) 0.3179(2) 0.0650(6) Uani 1 1 d . . . . .
 H19 H 0.326100 0.693313 0.241056 0.078 Uiso 1 1 calc R U . . .
 C20 C 0.41490(11) 0.5603(3) 0.35994(18) 0.0506(5) Uani 1 1 d . . . . .
 C21 C 0.47370(10) 0.5694(2) 0.47744(16) 0.0430(4) Uani 1 1 d . . . . .

loop_
  _atom_site_aniso_label
  _atom_site_aniso_U_11
  _atom_site_aniso_U_22
  _atom_site_aniso_U_33
  _atom_site_aniso_U_23
  _atom_site_aniso_U_13
  _atom_site_aniso_U_12
 C6 0.0381(8) 0.0288(8) 0.0358(8) 0.0050(6) 0.0165(7) 0.0021(6)
 C5 0.0438(9) 0.0410(10) 0.0469(10) -0.0022(8) 0.0144(8) 0.0073(8)
 C4 0.0541(11) 0.0491(11) 0.0451(10) -0.0121(8) 0.0149(8) 0.0018(8)
 C3 0.0453(10) 0.0558(12) 0.0396(10) -0.0037(8) 0.0059(8) 0.0007(8)
 C2 0.0366(8) 0.0422(10) 0.0415(9) 0.0051(7) 0.0102(7) 0.0056(7)
 C1 0.0344(8) 0.0324(9) 0.0337(8) 0.0054(6) 0.0134(6) 0.0026(6)
 C7 0.0342(8) 0.0309(9) 0.0361(8) 0.0071(7) 0.0146(7) 0.0043(6)
 C8 0.0364(8) 0.0371(9) 0.0358(8) -0.0012(7) 0.0107(7) 0.0073(7)
 C9 0.0479(10) 0.0472(11) 0.0610(12) 0.0030(9) 0.0252(9) 0.0050(8)
 C10 0.0422(10) 0.0696(15) 0.0711(14) -0.0123(11) 0.0247(10) 0.0066(9)
 C11 0.0474(11) 0.0639(14) 0.0621(13) -0.0047(10) 0.0089(9) 0.0251(9)
 C12 0.0688(13) 0.0547(13) 0.0675(14) 0.0179(11) 0.0196(11) 0.0262(10)
 C13 0.0521(11) 0.0495(12) 0.0619(12) 0.0164(10) 0.0238(9) 0.0159(9)
 C14 0.0534(11) 0.0792(16) 0.0452(11) -0.0046(10) 0.0130(9) -0.0129(11)
 C15 0.0619(13) 0.0664(14) 0.0569(12) -0.0176(11) 0.0253(10) -0.0152(11)
 C16 0.0474(10) 0.0556(13) 0.0575(12) -0.0020(9) 0.0252(9) -0.0079(9)
 C17 0.0685(14) 0.0562(14) 0.0818(17) -0.0027(12) 0.0344(13) -0.0002(11)
 C18 0.0614(14) 0.0708(17) 0.0892(18) 0.0182(14) 0.0249(13) 0.0131(12)
 C19 0.0502(12) 0.0838(17) 0.0607(13) 0.0143(12) 0.0135(10) 0.0053(11)
 C20 0.0400(9) 0.0665(13) 0.0480(11) 0.0063(9) 0.0161(8) -0.0067(9)
 C21 0.0367(9) 0.0534(11) 0.0435(10) 0.0024(8) 0.0188(8) -0.0078(7)

_geom_special_details
;
 All esds (except the esd in the dihedral angle between two l.s. planes)
 are estimated using the full covariance matrix.  The cell esds are taken
 into account individually in the estimation of esds in distances, angles
 and torsion angles; correlations between esds in cell parameters are only
 used when they are defined by crystal symmetry.  An approximate (isotropic)
 treatment of cell esds is used for estimating esds involving l.s. planes.
;
loop_
  _geom_bond_atom_site_label_1
  _geom_bond_atom_site_label_2
  _geom_bond_distance
  _geom_bond_site_symmetry_2
  _geom_bond_publ_flag
 C6 C5 1.429(2) . ?
 C6 C1 1.439(2) . ?
 C6 C7 1.402(2) 3_767 ?
 C5 H5 0.9300 . ?
 C5 C4 1.356(3) . ?
 C4 H4 0.9300 . ?
 C4 C3 1.410(3) . ?
 C3 H3 0.9300 . ?
 C3 C2 1.355(3) . ?
 C2 H2 0.9300 . ?
 C2 C1 1.428(2) . ?
 C1 C7 1.406(2) . ?
 C7 C8 1.497(2) . ?
 C8 C9 1.384(2) . ?
 C8 C13 1.378(3) . ?
 C9 H9 0.9300 . ?
 C9 C10 1.386(3) . ?
 C10 H10 0.9300 . ?
 C10 C11 1.364(3) . ?
 C11 H11 0.9300 . ?
 C11 C12 1.369(3) . ?
 C12 H12 0.9300 . ?
 C12 C13 1.385(3) . ?
 C13 H13 0.9300 . ?
 C14 H14 0.9300 . ?
 C14 C15 1.336(3) . ?
 C14 C20 1.429(3) 3_666 ?
 C15 H15 0.9300 . ?
 C15 C16 1.435(3) . ?
 C16 C17 1.398(3) . ?
 C16 C21 1.417(3) . ?
 C17 H17 0.9300 . ?
 C17 C18 1.379(3) . ?
 C18 H18 0.9300 . ?
 C18 C19 1.372(4) . ?
 C19 H19 0.9300 . ?
 C19 C20 1.389(3) . ?
 C20 C21 1.424(3) . ?
 C21 C21 1.422(4) 3_666 ?

loop_
  _geom_angle_atom_site_label_1
  _geom_angle_atom_site_label_2
  _geom_angle_atom_site_label_3
  _geom_angle
  _geom_angle_site_symmetry_1
  _geom_angle_site_symmetry_3
  _geom_angle_publ_flag
 C5 C6 C1 118.03(14) . . ?
 C7 C6 C5 122.07(14) 3_767 . ?
 C7 C6 C1 119.88(14) 3_767 . ?
 C6 C5 H5 119.3 . . ?
 C4 C5 C6 121.41(16) . . ?
 C4 C5 H5 119.3 . . ?
 C5 C4 H4 119.7 . . ?
 C5 C4 C3 120.52(17) . . ?
 C3 C4 H4 119.7 . . ?
 C4 C3 H3 119.8 . . ?
 C2 C3 C4 120.41(16) . . ?
 C2 C3 H3 119.8 . . ?
 C3 C2 H2 119.3 . . ?
 C3 C2 C1 121.46(15) . . ?
 C1 C2 H2 119.3 . . ?
 C2 C1 C6 118.17(14) . . ?
 C7 C1 C6 119.74(14) . . ?
 C7 C1 C2 122.08(14) . . ?
 C6 C7 C1 120.38(14) 3_767 . ?
 C6 C7 C8 120.35(14) 3_767 . ?
 C1 C7 C8 119.27(14) . . ?
 C9 C8 C7 121.15(15) . . ?
 C13 C8 C7 120.66(15) . . ?
 C13 C8 C9 118.18(16) . . ?
 C8 C9 H9 119.7 . . ?
 C8 C9 C10 120.66(19) . . ?
 C10 C9 H9 119.7 . . ?
 C9 C10 H10 119.8 . . ?
 C11 C10 C9 120.43(19) . . ?
 C11 C10 H10 119.8 . . ?
 C10 C11 H11 120.2 . . ?
 C10 C11 C12 119.57(18) . . ?
 C12 C11 H11 120.2 . . ?
 C11 C12 H12 119.8 . . ?
 C11 C12 C13 120.3(2) . . ?
 C13 C12 H12 119.8 . . ?
 C8 C13 C12 120.83(18) . . ?
 C8 C13 H13 119.6 . . ?
 C12 C13 H13 119.6 . . ?
 C15 C14 H14 119.0 . . ?
 C15 C14 C20 122.0(2) . 3_666 ?
 C20 C14 H14 119.0 3_666 . ?
 C14 C15 H15 119.2 . . ?
 C14 C15 C16 121.6(2) . . ?
 C16 C15 H15 119.2 . . ?
 C17 C16 C15 123.3(2) . . ?
 C17 C16 C21 118.61(19) . . ?
 C21 C16 C15 118.13(19) . . ?
 C16 C17 H17 119.5 . . ?
 C18 C17 C16 120.9(2) . . ?
 C18 C17 H17 119.5 . . ?
 C17 C18 H18 119.7 . . ?
 C19 C18 C17 120.6(2) . . ?
 C19 C18 H18 119.7 . . ?
 C18 C19 H19 119.4 . . ?
 C18 C19 C20 121.2(2) . . ?
 C20 C19 H19 119.4 . . ?
 C19 C20 C14 123.2(2) . 3_666 ?
 C19 C20 C21 118.7(2) . . ?
 C21 C20 C14 118.12(19) . 3_666 ?
 C16 C21 C20 119.87(18) . . ?
 C16 C21 C21 120.3(2) . 3_666 ?
 C21 C21 C20 119.8(2) 3_666 . ?

loop_
  _geom_torsion_atom_site_label_1
  _geom_torsion_atom_site_label_2
  _geom_torsion_atom_site_label_3
  _geom_torsion_atom_site_label_4
  _geom_torsion
  _geom_torsion_site_symmetry_1
  _geom_torsion_site_symmetry_2
  _geom_torsion_site_symmetry_3
  _geom_torsion_site_symmetry_4
  _geom_torsion_publ_flag
 C6 C5 C4 C3 0.7(3) . . . . ?
 C6 C1 C7 C6 0.0(2) . . . 3_767 ?
 C6 C1 C7 C8 -179.46(14) . . . . ?
 C6 C7 C8 C9 93.6(2) 3_767 . . . ?
 C6 C7 C8 C13 -87.1(2) 3_767 . . . ?
 C5 C6 C1 C2 -0.1(2) . . . . ?
 C5 C6 C1 C7 178.46(14) . . . . ?
 C5 C4 C3 C2 -0.4(3) . . . . ?
 C4 C3 C2 C1 -0.2(3) . . . . ?
 C3 C2 C1 C6 0.4(2) . . . . ?
 C3 C2 C1 C7 -178.10(16) . . . . ?
 C2 C1 C7 C6 178.51(15) . . . 3_767 ?
 C2 C1 C7 C8 -0.9(2) . . . . ?
 C1 C6 C5 C4 -0.5(2) . . . . ?
 C1 C7 C8 C9 -86.9(2) . . . . ?
 C1 C7 C8 C13 92.3(2) . . . . ?
 C7 C6 C5 C4 177.94(17) 3_767 . . . ?
 C7 C6 C1 C2 -178.56(14) 3_767 . . . ?
 C7 C6 C1 C7 0.0(2) 3_767 . . . ?
 C7 C8 C9 C10 178.38(17) . . . . ?
 C7 C8 C13 C12 -178.35(19) . . . . ?
 C8 C9 C10 C11 0.1(3) . . . . ?
 C9 C8 C13 C12 0.9(3) . . . . ?
 C9 C10 C11 C12 0.7(3) . . . . ?
 C10 C11 C12 C13 -0.6(3) . . . . ?
 C11 C12 C13 C8 -0.2(3) . . . . ?
 C13 C8 C9 C10 -0.9(3) . . . . ?
 C14 C15 C16 C17 -179.4(2) . . . . ?
 C14 C15 C16 C21 -0.1(3) . . . . ?
 C14 C20 C21 C16 -178.88(17) 3_666 . . . ?
 C14 C20 C21 C21 0.6(3) 3_666 . . 3_666 ?
 C15 C16 C17 C18 179.1(2) . . . . ?
 C15 C16 C21 C20 -179.59(16) . . . . ?
 C15 C16 C21 C21 0.9(3) . . . 3_666 ?
 C16 C17 C18 C19 0.3(3) . . . . ?
 C17 C16 C21 C20 -0.3(3) . . . . ?
 C17 C16 C21 C21 -179.84(19) . . . 3_666 ?
 C17 C18 C19 C20 0.0(3) . . . . ?
 C18 C19 C20 C14 179.0(2) . . . 3_666 ?
 C18 C19 C20 C21 -0.4(3) . . . . ?
 C19 C20 C21 C16 0.6(3) . . . . ?
 C19 C20 C21 C21 -179.9(2) . . . 3_666 ?
 C20 C14 C15 C16 -1.0(3) 3_666 . . . ?
 C21 C16 C17 C18 -0.1(3) . . . . ?

_shelx_res_file
;
TITL Structure_a.res in P2(1)/c
    pyr_dpa_pdv24.res
    created by SHELXL-2018/3 at 11:12:20 on 20-Apr-2023
CELL 0.71073 16.4311 8.03 11.2057 90 104.651 90
ZERR 2 0.001 0.0003 0.0007 0 0.002 0
LATT 1
SYMM -X,0.5+Y,0.5-Z
SFAC C H
UNIT 84 56

L.S. 12
PLAN  5 0 0
SIZE 0.03 0.719 0.845
TEMP 23
CONF
HTAB
MORE -1
BOND $H
fmap 2
acta
SHEL 6.79 0.78
OMIT 1 0 0
REM <olex2.extras>
REM <HklSrc "%.\\Pyr_DPA_PDV24.hkl">
REM </olex2.extras>

WGHT    0.055100    0.573600
FVAR       0.67902
C6    1    1.001754    0.628156    1.087214    11.00000    0.03807    0.02883 =
         0.03581    0.00501    0.01649    0.00206
C5    1    1.006133    0.752452    1.179890    11.00000    0.04382    0.04104 =
         0.04686   -0.00218    0.01444    0.00729
AFIX  43
H5    2    0.962132    0.827906    1.171812    11.00000   -1.20000
AFIX   0
C4    1    1.073058    0.762731    1.279336    11.00000    0.05408    0.04908 =
         0.04507   -0.01215    0.01495    0.00185
AFIX  43
H4    2    1.074094    0.843973    1.338851    11.00000   -1.20000
AFIX   0
C3    1    1.141106    0.651214    1.293242    11.00000    0.04528    0.05584 =
         0.03958   -0.00372    0.00586    0.00071
AFIX  43
H3    2    1.186857    0.659853    1.361563    11.00000   -1.20000
AFIX   0
C2    1    1.140258    0.531583    1.207716    11.00000    0.03660    0.04219 =
         0.04149    0.00506    0.01018    0.00565
AFIX  43
H2    2    1.185744    0.459294    1.218227    11.00000   -1.20000
AFIX   0
C1    1    1.071047    0.514003    1.101743    11.00000    0.03439    0.03242 =
         0.03374    0.00545    0.01337    0.00260
C7    1    1.068192    0.387387    1.014100    11.00000    0.03417    0.03093 =
         0.03607    0.00712    0.01456    0.00430
C8    1    1.140316    0.268398    1.030764    11.00000    0.03642    0.03708 =
         0.03584   -0.00123    0.01068    0.00728
C9    1    1.209582    0.304860    0.986394    11.00000    0.04791    0.04715 =
         0.06098    0.00305    0.02521    0.00498
AFIX  43
H9    2    1.210957    0.403649    0.943630    11.00000   -1.20000
AFIX   0
C10   1    1.276956    0.195588    1.005052    11.00000    0.04223    0.06957 =
         0.07108   -0.01226    0.02469    0.00658
AFIX  43
H10   2    1.323163    0.221687    0.974848    11.00000   -1.20000
AFIX   0
C11   1    1.275915    0.050054    1.067419    11.00000    0.04738    0.06385 =
         0.06212   -0.00467    0.00891    0.02512
AFIX  43
H11   2    1.321461   -0.022439    1.080516    11.00000   -1.20000
AFIX   0
C12   1    1.207386    0.011395    1.110609    11.00000    0.06881    0.05466 =
         0.06749    0.01788    0.01958    0.02621
AFIX  43
H12   2    1.206190   -0.088222    1.152464    11.00000   -1.20000
AFIX   0
C13   1    1.139819    0.119916    1.092280    11.00000    0.05207    0.04946 =
         0.06193    0.01638    0.02378    0.01592
AFIX  43
H13   2    1.093540    0.092241    1.121852    11.00000   -1.20000
AFIX   0

C14   1    0.589634    0.590917    0.708615    11.00000    0.05344    0.07920 =
         0.04520   -0.00460    0.01301   -0.01294
AFIX  43
H14   2    0.628621    0.599387    0.784653    11.00000   -1.20000
AFIX   0
C15   1    0.539549    0.720564    0.666770    11.00000    0.06187    0.06644 =
         0.05690   -0.01756    0.02535   -0.01519
AFIX  43
H15   2    0.543974    0.816038    0.714970    11.00000   -1.20000
AFIX   0
C16   1    0.479102    0.716095    0.549285    11.00000    0.04744    0.05560 =
         0.05751   -0.00201    0.02524   -0.00790
C17   1    0.426243    0.849667    0.501950    11.00000    0.06848    0.05618 =
         0.08183   -0.00273    0.03442   -0.00017
AFIX  43
H17   2    0.429018    0.946635    0.548190    11.00000   -1.20000
AFIX   0
C18   1    0.370012    0.839715    0.387615    11.00000    0.06143    0.07077 =
         0.08920    0.01824    0.02492    0.01309
AFIX  43
H18   2    0.335560    0.930130    0.357483    11.00000   -1.20000
AFIX   0
C19   1    0.364419    0.697676    0.317901    11.00000    0.05018    0.08384 =
         0.06072    0.01434    0.01355    0.00525
AFIX  43
H19   2    0.326100    0.693313    0.241056    11.00000   -1.20000
AFIX   0
C20   1    0.414899    0.560333    0.359936    11.00000    0.04002    0.06654 =
         0.04805    0.00626    0.01608   -0.00667
C21   1    0.473700    0.569389    0.477436    11.00000    0.03671    0.05341 =
         0.04347    0.00245    0.01880   -0.00780
HKLF 4


REM  Structure_a.res in P2(1)/c
REM wR2 = 0.1434, GooF = S = 1.025, Restrained GooF = 1.025 for all data
REM R1 = 0.0506 for 2160 Fo > 4sig(Fo) and 0.0830 for all 3143 data
REM 190 parameters refined using 0 restraints

END

WGHT      0.0551      0.5735

REM No hydrogen bonds found for HTAB generation

REM Highest difference peak  0.212,  deepest hole -0.171,  1-sigma level  0.037
Q1    1   1.1007  0.3169  1.0238  11.00000  0.05    0.21
Q2    1   1.0567  0.4124  1.0797  11.00000  0.05    0.20
Q3    1   1.0813  0.4887  1.0372  11.00000  0.05    0.20
Q4    1   1.0248  0.5360  1.1047  11.00000  0.05    0.19
Q5    1   1.0201  0.7265  1.1124  11.00000  0.05    0.19
;
_shelx_res_checksum                26297
_shelx_hkl_file
;
   0   0   1    0.20    0.20
   0   0   1    0.30    0.20
   0   0  -1    0.10    0.20
   0   0  -1    0.20    0.20
   0   0  -2 1608.44   79.49
   0   0   2 1656.83   79.49
   0   0   2 1598.84   79.49
   0   0  -2 1709.43   79.49
   0   0   3   -0.70    0.80
   0   0  -3    0.00    1.30
   0   0  -3   -0.30    0.80
   0   0  -3   -1.20    0.90
   0   0   3   -1.50    0.90
   0   0   4  372.76   18.10
   0   0  -4  366.66   18.10
   0   0   4  350.76   18.10
   0   0  -4  368.96   18.40
   0   0  -4  381.46   18.10
   0   0  -5   -1.30    1.00
   0   0   5   -1.40    1.00
   0   0  -5   -2.10    1.20
   0   0  -5    1.30    1.70
   0   0   5   -3.30    1.20
   0   0  -6  263.17   12.30
   0   0  -6  249.58   12.70
   0   0  -6  251.37   12.30
   0   0   6  245.58   12.30
   0   0   6  204.78   12.20
   0   0  -7    0.10    1.40
   0   0  -7    0.70    2.60
   0   0   7    1.80    1.50
   0   0   8   -0.50    1.60
   0   0  -8    0.60    1.50
   0   0   9    1.80    1.70
   0   0  -9   -1.60    1.70
   0   0 -10  276.57   14.70
   0   0  10  289.37   14.70
   0   0  11   -0.30    2.10
   0   0 -11    1.20    2.10
   0   0  12    3.80    2.20
   0   0 -12   -2.70    2.30
   0   0 -13   -0.70    2.60
   0   0  13    2.10    2.20
   0   0  14    1.60    2.40
   0   0 -14   -1.50    2.70
   0   1  -1  148.59    7.30
   0   1   1  155.68    7.30
   0   1   1  154.98    7.50
   0   1   1  139.39    7.30
   0   1  -1  151.38    7.30
   0  -1   1  126.19    7.30
   0  -1  -1  154.68    7.50
   0  -1   1  157.58    7.30
   0  -1  -1  157.58    7.30
   0   1  -2  101.19    4.80
   0   1   2   92.19    4.90
   0   1   2   91.99    5.10
   0   1   2   98.99    4.90
   0   1  -2   92.19    4.90
   0  -1   2   90.49    4.80
   0  -1  -2   99.39    4.90
   0  -1   2   94.99    4.80
   0  -1  -2   94.29    4.90
   0  -1  -2   96.89    5.10
   0   1   3  340.87   16.70
   0   1   3  345.67   16.70
   0   1  -3  352.56   16.70
   0   1  -3  342.97   16.70
   0   1   3  340.87   16.90
   0  -1  -3  338.07   16.70
   0  -1   3  348.37   16.70
   0  -1  -3  310.97   16.70
   0  -1  -3  349.67   16.90
   0  -1   3  331.27   16.60
   0   1   4    4.00    1.70
   0   1  -4    1.40    1.00
   0   1   4    2.70    1.00
   0   1   4    1.20    1.00
   0   1  -4    0.80    0.90
   0  -1  -4    2.50    0.90
   0  -1  -4    2.20    1.00
   0  -1   4    2.10    0.90
   0  -1  -4    2.30    1.40
   0  -1   4    2.40    0.90
   0   1  -5    4.60    1.30
   0   1   5    3.20    1.30
   0   1  -5    5.60    1.20
   0   1   5    3.90    1.20
   0  -1  -5    4.20    1.80
   0  -1  -5    5.60    1.30
   0  -1   5    6.00    1.20
   0  -1  -5    4.50    1.20
   0  -1   5    6.00    1.10
   0   1   6   -0.10    1.20
   0   1  -6   -0.60    1.30
   0   1  -6   -0.40    1.10
   0   1   6   -1.40    1.40
   0  -1  -6   -1.40    1.10
   0  -1   6   -1.10    1.20
   0  -1   6   -2.10    1.00
   0  -1  -6   -0.70    1.90
   0  -1  -6    0.10    1.20
   0   1  -7   -2.40    1.90
   0   1  -7    0.00    1.40
   0   1   7    0.70    1.50
   0  -1   7    0.90    1.20
   0  -1  -7    0.90    1.30
   0  -1   7    0.40    1.30
   0   1  -8    6.50    1.70
   0   1   8    4.20    1.70
   0  -1  -8    3.60    1.60
   0  -1   8    5.40    1.60
   0   1  -9   38.40    3.70
   0  -1  -9   34.60    3.50
   0  -1   9   35.80    3.40
   0   1  10   97.59    6.60
   0   1 -10  103.49    6.40
   0  -1 -10   98.79    6.30
   0  -1  10  102.39    6.20
   0   1 -11   16.70    2.70
   0   1  11   13.80    2.50
   0  -1  11   13.40    2.20
   0  -1 -11   14.70    2.60
   0   1 -12    1.60    2.30
   0   1  12    2.40    2.20
   0  -1  12    1.70    2.00
   0  -1 -12   -0.20    2.20
   0   1  13    0.80    2.30
   0   1 -13   -5.90    2.50
   0  -1  13    2.20    2.10
   0  -1 -13   -5.60    2.40
   0   1 -14   -5.80    2.70
   0   1  14    0.40    2.50
   0  -1  14    0.10    2.20
   0  -1 -14    0.50    2.80
   0   2   1  373.56   18.60
   0   2   1  384.96   18.90
   0  -2  -1  379.56   18.90
   0  -2  -1  397.76   18.60
   0   2  -2    0.10    0.40
   0   2   2   -0.30    0.60
   0   2   2    0.30    0.70
   0   2   2   -0.50    1.30
   0   2  -2   -0.10    0.50
   0  -2   2    0.40    0.20
   0  -2   2    1.00    0.30
   0  -2  -2   -0.10    0.50
   0  -2  -2    0.60    0.60
   0  -2  -2    0.40    1.10
   0   2  -3  419.76   18.70
   0   2   3  383.66   18.70
   0   2   3  324.17   18.70
   0   2  -3  386.66   18.70
   0   2   3  380.06   19.10
   0  -2   3  404.76   18.60
   0  -2  -3  392.96   18.70
   0  -2   3  385.76   18.60
   0  -2  -3  379.36   19.00
   0  -2  -3  367.06   18.70
   0   2  -4  759.12   37.60
   0   2  -4  832.72   37.60
   0   2   4  738.83   37.60
   0   2   4  687.63   37.60
   0   2   4  793.92   38.00
   0  -2  -4  780.32   37.60
   0  -2  -4  805.22   37.90
   0  -2   4  794.52   37.50
   0  -2  -4  806.92   37.60
   0  -2   4  726.93   37.50
   0   2   5   16.50    1.60
   0   2  -5   19.00    1.70
   0   2  -5   13.40    1.40
   0   2   5   14.30    1.70
   0   2   5   22.70    3.00
   0  -2  -5   17.80    1.60
   0  -2  -5   21.40    2.60
   0  -2   5   18.90    1.50
   0  -2  -5   14.30    1.50
   0  -2   5   14.10    1.40
   0   2  -6  614.54   26.50
   0   2   6  468.35   27.10
   0   2   6  535.45   27.00
   0   2   6  495.25   26.50
   0   2  -6  536.35   26.50
   0  -2  -6  535.45   26.50
   0  -2   6  568.54   26.40
   0  -2  -6  586.94   27.50
   0  -2  -6  544.75   26.40
   0  -2   6  490.55   26.30
   0   2  -7   14.40    1.90
   0   2   7   16.70    2.10
   0  -2   7   13.30    1.50
   0  -2   7   12.10    1.50
   0  -2  -7   13.50    1.70
   0   2   8   11.00    2.10
   0   2  -8   13.70    2.00
   0  -2   8   16.10    1.80
   0  -2   8    9.60    1.60
   0  -2  -8   15.10    2.00
   0   2  -9   26.20    2.80
   0   2   9   25.50    2.90
   0  -2  -9   23.70    2.60
   0  -2   9   26.60    2.50
   0   2 -10    9.60    2.20
   0   2  10   11.90    2.60
   0  -2 -10    5.70    2.10
   0  -2  10    6.60    1.80
   0   2 -11    0.00    2.20
   0   2  11   -2.70    2.20
   0  -2 -11   -3.50    2.00
   0  -2  11    0.80    1.70
   0   2 -12    2.20    2.40
   0   2  12    4.10    2.50
   0  -2  12    0.40    1.80
   0  -2 -12   -1.10    2.30
   0   2 -13    1.20    2.70
   0   2  13   -2.00    2.50
   0  -2  13   -0.10    1.90
   0  -2 -13   -3.10    2.50
   0   2  14    3.10    2.60
   0   2 -14    5.40    3.10
   0  -2  14    6.40    2.30
   0   3   1  269.17   13.10
   0   3   1  275.27   13.60
   0   3   1  266.47   13.20
   0   3  -2  381.06   19.10
   0   3   2  405.06   19.30
   0   3   2  389.66   19.70
   0   3  -2  403.16   19.20
   0   3   2  395.36   19.20
   0  -3  -2  396.36   19.10
   0  -3  -2  389.96   19.20
   0  -3  -2  398.06   19.60
   0   3   3  611.44   32.30
   0   3   3  685.63   32.30
   0   3  -3  647.44   32.20
   0   3   3  681.53   32.70
   0   3  -3  666.93   32.20
   0  -3  -3  636.54   32.20
   0  -3  -3  687.83   32.70
   0  -3  -3  690.73   32.20
   0   3  -4   80.49    4.40
   0   3   4   87.79    4.60
   0   3  -4   86.19    4.50
   0   3   4   80.29    5.20
   0   3   4   83.69    4.50
   0  -3  -4   82.69    5.00
   0  -3  -4   83.29    4.40
   0  -3   4   79.39    4.10
   0  -3   4   81.39    4.20
   0  -3  -4   77.29    4.40
   0   3  -5  118.09    5.70
   0   3   5  104.89    6.50
   0   3   5  106.19    5.80
   0   3   5  106.29    5.80
   0   3  -5  108.19    5.70
   0  -3   5  104.89    5.40
   0  -3  -5  101.79    6.20
   0  -3   5  103.19    5.40
   0  -3  -5   99.59    5.60
   0   3  -6   18.50    1.70
   0   3  -6   16.00    1.70
   0   3   6   20.90    3.10
   0   3   6   14.00    1.90
   0  -3  -6   15.30    1.60
   0  -3   6   17.80    1.80
   0  -3   6   17.20    1.70
   0  -3  -6   15.20    1.60
   0   3  -7  124.09    6.80
   0   3   7  118.59    6.90
   0   3   7  119.49    7.70
   0  -3  -7  132.79    7.10
   0  -3  -7  124.89    6.60
   0  -3   7  112.89    6.40
   0  -3   7  119.99    6.50
   0   3  -8  157.18    8.80
   0   3   8  160.08    9.00
   0   3   8  155.08    9.60
   0  -3   8  158.28    8.50
   0  -3  -8  172.58    8.60
   0  -3   8  163.68    8.50
   0   3  -9    4.80    2.10
   0   3   9    4.50    2.30
   0  -3   9    2.70    2.50
   0  -3  -9    6.30    1.80
   0  -3   9    4.40    1.40
   0   3  10    5.10    2.20
   0   3 -10    7.60    2.30
   0  -3  10    6.30    1.60
   0  -3 -10    4.00    2.00
   0   3 -11   -0.50    2.20
   0   3  11    2.90    2.40
   0  -3  11    2.20    1.60
   0   3  12    1.30    2.60
   0   3 -12   -1.60    2.40
   0  -3  12    0.50    1.60
   0   3  13    9.60    3.10
   0   3 -13   10.10    2.90
   0  -3 -13    7.00    2.40
   0  -3  13    9.80    2.10
   0   4   1   90.19    4.60
   0   4   1   92.59    4.50
   0   4  -2   94.79    4.70
   0   4  -2   93.69    4.70
   0   4   2   93.59    5.00
   0   4   2   96.19    5.70
   0   4   2  101.69    4.90
   0   4  -3  463.85   22.10
   0   4   3  415.56   22.30
   0   4   3  465.25   22.90
   0   4   3  475.75   22.30
   0   4  -3  452.95   22.20
   0  -4  -3  459.75   22.70
   0  -4  -3  462.25   22.10
   0  -4  -3  446.26   22.10
   0   4  -4    6.50    1.00
   0   4   4    5.90    1.30
   0   4   4    8.80    1.20
   0   4   4    9.60    2.30
   0   4  -4    7.10    0.90
   0  -4  -4    7.20    0.80
   0  -4  -4    6.30    0.90
   0   4  -5    1.00    1.00
   0   4  -5    0.80    0.90
   0   4   5    3.60    2.30
   0   4   5    2.90    1.40
   0   4   5    3.50    1.30
   0  -4  -5    3.90    0.80
   0  -4  -5    2.10    0.90
   0  -4   5    2.70    0.40
   0   4   6    9.40    2.80
   0   4   6    6.80    1.70
   0   4  -6    6.50    1.40
   0   4  -6    8.30    1.50
   0  -4  -6    5.80    1.10
   0  -4   6    6.90    0.80
   0  -4   6    6.70    0.80
   0  -4  -6    6.90    1.20
   0   4   7   -5.60    1.70
   0   4  -7   -2.50    1.50
   0   4   7    0.30    2.70
   0  -4  -7   -4.10    1.20
   0  -4   7   -2.90    0.80
   0   4   8   24.00    4.10
   0   4  -8   10.60    2.10
   0   4   8   11.10    2.50
   0  -4   8   10.20    1.40
   0  -4  -8    9.90    1.80
   0  -4   8   11.80    1.40
   0   4   9   10.30    2.40
   0   4   9   13.40    3.90
   0   4  -9   15.80    2.40
   0  -4   9   12.60    1.50
   0  -4  -9   10.80    1.80
   0  -4   9   13.10    1.80
   0   4  10   24.70    3.10
   0   4 -10   17.40    2.70
   0  -4 -10   21.70    2.30
   0  -4  10   17.40    1.80
   0   4  11    1.60    2.60
   0   4 -11    1.90    2.30
   0  -4  11    2.90    1.40
   0  -4 -11    3.40    1.80
   0   4 -12    4.60    2.60
   0   4  12    7.90    2.90
   0  -4 -12    2.70    2.00
   0  -4  12    8.50    1.70
   0   4 -13    2.40    2.70
   0   4  13    3.20    2.90
   0  -4  13   -0.40    1.60
   0  -4 -13   -1.10    2.10
   0   5   0   -1.00    1.30
   0   5   1    2.40    1.50
   0   5   1    3.50    0.60
   0   5   2   16.10    1.40
   0   5   2   21.70    2.60
   0   5   2   15.60    1.60
   0   5   3    3.40    0.90
   0   5   3    4.50    2.10
   0   5  -3    3.50    0.70
   0   5   3    3.00    1.00
   0   5  -3    2.80    0.60
   0   5  -4  143.79    7.20
   0   5  -4  143.79    7.30
   0   5   4  133.59    8.30
   0   5   4  145.89    7.40
   0   5   4  146.39    7.50
   0  -5  -4  138.39    7.00
   0  -5  -4  142.09    7.00
   0   5  -5    1.40    0.90
   0   5   5   -0.80    1.30
   0   5   5   -0.60    2.30
   0   5  -5    1.20    1.00
   0  -5  -5    0.90    0.60
   0  -5  -5   -0.30    0.70
   0   5   6    3.40    2.80
   0   5  -6    0.30    1.20
   0   5   6   -1.50    1.50
   0  -5  -6   -0.40    0.80
   0  -5  -6   -0.30    0.90
   0   5  -7    5.60    1.60
   0   5   7    2.00    1.90
   0   5   7   10.30    3.40
   0  -5  -7    8.00    1.40
   0  -5  -7    6.40    1.20
   0   5   8   12.30    2.40
   0   5  -8   10.60    2.00
   0   5   8   19.80    3.90
   0  -5  -8   10.20    1.50
   0  -5   8   11.90    1.20
   0  -5   8   13.20    1.20
   0   5   9   30.00    3.30
   0   5   9   30.80    5.00
   0   5  -9   24.70    2.80
   0  -5  -9   24.70    2.30
   0  -5   9   27.40    2.00
   0   5  10    6.60    2.60
   0   5  10    2.20    3.90
   0   5 -10    3.00    2.20
   0  -5 -10    3.60    1.60
   0  -5  10    5.50    1.00
   0   5  11    7.40    2.80
   0   5 -11    6.80    2.50
   0  -5 -11    6.70    1.80
   0  -5  11    8.30    1.30
   0   5  12    9.50    3.00
   0   5 -12    1.10    2.40
   0  -5 -12    5.00    1.90
   0   6   0    4.50    1.90
   0   6   1    0.30    0.50
   0   6   1    1.80    1.70
   0   6   1    0.00    0.60
   0   6   2    1.20    2.00
   0   6   2    1.70    0.70
   0   6   2    0.60    0.90
   0   6  -3    2.70    0.70
   0   6  -3    4.90    0.70
   0   6   3    4.00    2.40
   0   6   3    5.00    1.20
   0   6   3    4.50    1.00
   0   6  -4   35.50    2.40
   0   6  -4   35.40    2.30
   0   6   4   31.80    2.90
   0   6   4   33.70    3.80
   0   6  -5    7.60    1.30
   0   6   5    7.20    2.90
   0   6  -5    6.50    1.20
   0   6   5    2.70    1.50
   0   6   6   18.00    3.50
   0   6   6   19.80    2.30
   0   6  -6   20.80    1.90
   0  -6  -6   19.20    1.50
   0  -6  -6   14.90    1.50
   0   6   7    0.20    3.10
   0   6  -7    1.90    1.50
   0   6   7    1.10    1.80
   0  -6  -7    1.20    0.80
   0   6   8   14.30    4.10
   0   6  -8   14.60    2.00
   0   6   8   13.10    2.50
   0  -6  -8   10.80    1.30
   0   6  -9    6.40    2.10
   0   6   9    7.70    4.10
   0   6   9    7.90    2.50
   0  -6  -9    5.90    1.30
   0   6  10   24.60    5.30
   0   6  10   25.50    3.30
   0   6 -10   23.40    2.90
   0  -6 -10   22.30    2.20
   0   6  11   16.30    3.10
   0   6 -11   11.50    2.70
   0  -6 -11    8.70    1.90
   0   6 -12   -2.30    2.50
   0   6  12    4.90    3.00
   0  -6 -12   -0.20    1.70
   0   7   0    2.60    2.30
   0   7   1  100.79    5.40
   0   7  -1  105.99    6.70
   0   7   1  118.99    7.00
   0   7   1  104.99    5.50
   0   7   2    8.10    1.20
   0   7   2   13.60    3.00
   0   7   2    9.50    1.10
   0   7  -3    1.20    0.60
   0   7  -3   -0.40    0.70
   0   7   3   -0.90    1.10
   0   7   3    0.60    2.60
   0   7   3    0.70    1.00
   0   7   4   12.10    3.10
   0   7  -4   10.60    1.20
   0   7  -4    8.80    1.20
   0   7   4    8.70    1.50
   0   7  -5   -2.30    1.10
   0   7   5   -1.50    1.50
   0   7   5    1.70    2.80
   0   7  -6   11.40    1.60
   0   7   6   11.00    2.00
   0   7   6   12.80    3.60
   0   7   7    2.10    2.00
   0   7  -7    4.00    1.60
   0   7   7    5.10    3.60
   0   7  -8    2.10    1.90
   0   7   8    2.80    3.70
   0   7   8    1.80    2.10
   0   7   9    1.50    3.90
   0   7   9    3.90    2.40
   0   7  10   15.10    3.10
   0   7  10   20.70    5.40
   0   7  11    8.90    3.00
   0   7  11    2.10    4.70
   0   8   0   60.59    5.20
   0   8   1   71.99    5.50
   0   8  -1   61.49    5.40
   0   8   2    0.80    2.70
   0   8  -2   -3.40    2.10
   0   8   2    0.80    1.10
   0   8   3   -0.30    2.90
   0   8   3    0.60    1.20
   0   8   4   11.70    1.70
   0   8   4   14.60    3.60
   0   8   5   10.00    3.20
   0   8   5    4.60    1.60
   0   8   6   18.70    4.30
   0   8   6   15.90    2.20
   0   8   7    8.70    3.90
   0   8   7    9.00    2.10
   0   8   8    0.80    2.10
   0   8   8    3.30    4.10
   0   8   9    5.80    2.50
   0   8   9   -3.60    4.20
   0   9   0    3.40    2.70
   0   9  -1   13.00    3.10
   0   9   1   14.80    3.50
   0   9   2    6.50    3.10
   0   9  -2    3.30    2.70
   0   9  -3   11.20    3.00
   0   9   3   16.30    4.00
   0   9   4   -0.60    3.10
   0   9   5    6.80    3.40
   0   9   6    6.00    3.60
   0   9   7    2.40    3.90
   0  10   0    0.30    3.00
   0  10  -1    3.10    3.00
   0  10   1    4.90    3.30
   0  10  -2   10.80    3.30
   0  10   2   17.40    4.10
   0  10  -3    6.00    3.00
   0  10   3    7.90    3.50
   0  10   4    7.10    3.80
   0  10  -4    2.10    2.70
   0  10   5    4.70    4.00
  -1   0  14    1.60    2.30
   1   0 -14   -0.50    2.80
  -1   0  13    2.70    2.20
   1   0 -13    0.70    2.60
  -1   0  12   15.00    2.60
   1   0 -12   12.80    2.80
  -1   0  11    4.90    2.20
   1   0 -11    3.60    2.30
   1   0 -10  115.49    7.20
  -1   0  10  125.59    7.20
  -1   0   9   -1.20    1.70
   1   0  -9    1.50    1.70
   1   0  -8   24.60    2.30
  -1   0   8   20.30    2.30
   1   0  -7   -0.90    1.40
  -1   0   7    0.40    1.50
  -1   0   7    1.60    1.40
  -1   0   6  409.36   19.80
   1   0  -6  384.96   20.20
  -1   0   6  398.76   19.80
   1   0  -6  388.26   19.80
   1   0  -6  415.26   19.80
   1   0  -5   -2.20    1.00
  -1   0   5   -2.00    1.10
   1   0  -5   -1.10    1.20
   1   0  -5   -0.60    1.80
  -1   0   5   -3.60    1.00
   1   0  -4 1165.78   58.09
   1   0  -4 1249.97   58.09
  -1   0   4 1173.98   57.99
  -1   0   3   -1.10    0.80
  -1   0   3   -0.80    0.90
   1   0  -3   -0.80    0.90
   1   0  -3   -0.40    0.90
  -1   0   2   27.60    2.00
   1   0  -2   32.40    1.90
   1   0  -1    0.40    0.20
  -1   0   1    0.10    0.20
  -1   0   1    0.40    0.30
   1   0  -1    0.20    0.20
  -1   0   0    0.00    0.10
   1   0   0    0.00    0.10
   1   0   0    0.00    0.10
  -1   0   0    0.00    0.10
  -1   0  -1    1.80    0.30
  -1   0  -1    2.60    0.40
   1   0   1    1.60    0.40
   1   0   1    3.80    0.40
  -1   0  -1    3.00    0.50
   1   0   2  480.65   26.00
   1   0   2  534.65   26.00
   1   0   2  551.14   26.10
  -1   0  -2  556.84   26.00
  -1   0  -2  550.04   26.10
  -1   0  -3    0.20    0.90
   1   0   3   -1.50    0.90
  -1   0  -3   -0.20    0.80
   1   0   3    0.50    0.80
  -1   0  -3    0.50    1.20
  -1   0  -4 1668.03   80.19
  -1   0  -4 1709.03   80.19
   1   0   4 1654.03   80.19
  -1   0  -4 1711.13   80.39
   1   0   4 1529.15   80.09
  -1   0  -5   -0.90    1.10
   1   0   5   -1.00    1.10
  -1   0  -5   -2.20    1.80
  -1   0  -5   -1.00    1.10
   1   0   5   -1.60    1.20
  -1   0  -6  269.07   13.80
  -1   0  -6  280.87   13.50
  -1   0  -6  247.78   13.40
   1   0   6  276.47   13.50
   1   0   6  260.77   13.50
   1   0   7   -1.50    1.30
  -1   0  -7    0.90    1.40
  -1   0  -7    0.00    2.30
   1   0   8    4.40    1.70
  -1   0  -8    3.90    1.60
  -1   0  -9   -1.10    1.80
   1   0   9   -2.90    1.70
   1   0  10  115.29    7.20
  -1   0 -10  126.89    7.30
  -1   0 -11   -1.90    2.10
   1   0  11   -0.40    2.00
   1   0  12    4.50    2.10
  -1   0 -12    0.60    2.30
  -1   0 -13   -0.80    2.60
   1   0  13    0.50    2.20
  -1   0 -14    2.50    2.80
   1   0  14    1.40    2.40
   1   1 -14    0.10    2.80
  -1   1  14    2.60    2.50
  -1  -1  14    4.10    2.30
   1  -1 -14    2.50    2.80
   1   1 -13    0.60    2.50
  -1   1  13    1.50    2.40
   1  -1 -13    1.00    2.60
  -1  -1  13    3.80    2.10
  -1   1  12   27.30    3.20
   1   1 -12   26.30    3.30
  -1  -1  12   17.30    2.60
   1  -1 -12   20.80    2.90
  -1   1  11   23.70    2.90
   1   1 -11   25.10    3.00
   1  -1 -11   21.20    2.70
  -1  -1  11   22.20    2.60
  -1   1  10   44.90    4.30
   1   1 -10   45.50    4.20
  -1  -1  10   42.50    3.90
   1  -1 -10   34.70    3.40
   1   1  -9    9.40    2.20
  -1   1   9    9.60    2.20
  -1  -1   9   11.50    2.10
   1  -1  -9   11.80    2.10
  -1   1   8   12.40    2.10
   1   1  -8   13.40    2.00
  -1  -1   8   16.00    1.90
   1  -1  -8    9.50    1.80
  -1   1   7   43.30    3.50
   1   1  -7   39.90    3.30
   1  -1  -7   41.00    3.30
  -1  -1   7   45.20    3.10
  -1  -1   7   43.30    3.20
   1   1  -6  121.39    6.40
   1   1  -6  119.19    6.50
  -1   1   6  108.59    6.50
  -1   1   6  117.99    6.40
  -1  -1   6  112.49    6.40
   1  -1  -6  123.69    6.40
   1  -1  -6  119.69    6.50
   1  -1  -6  123.79    6.90
  -1  -1   6  123.59    6.40
   1   1  -5   33.80    2.60
  -1   1   5   36.10    2.70
   1   1  -5   35.60    2.70
  -1   1   5   35.60    2.80
   1  -1  -5   34.70    2.70
   1  -1  -5   38.30    3.20
  -1  -1   5   31.00    2.60
  -1  -1   5   34.60    2.50
   1  -1  -5   31.90    2.60
   1   1  -4  298.97   13.30
  -1   1   4  254.67   13.30
   1   1  -4  277.27   13.40
  -1   1   4  276.17   13.40
   1  -1  -4  259.87   13.30
  -1  -1   4  233.28   13.30
  -1  -1   4  274.07   13.30
   1  -1  -4  271.57   13.30
   1  -1  -4  274.37   13.60
  -1   1   3 1649.04   78.19
   1   1  -3 1640.04   78.19
  -1   1   3 1504.65   78.19
   1   1  -3 1439.16   78.09
  -1   1   3 1663.43   78.39
  -1  -1   3 1751.52   78.19
   1  -1  -3 1534.15   78.19
   1  -1  -3 1682.23   78.39
  -1  -1   3 1655.63   78.19
   1  -1  -3 1630.04   78.19
  -1   1   2 2714.93  134.09
   1   1  -2 2697.33  132.99
   1   1  -2 2963.10  133.19
  -1   1   2 2795.32  133.09
  -1   1   2 2510.75  132.89
   1  -1  -2 2719.73  133.49
   1  -1  -2 2968.50  133.19
  -1  -1   2 2700.33  133.09
  -1  -1   2 2687.73  133.19
   1  -1  -2 2750.62  133.09
   1   1  -1 2817.42  126.49
  -1   1   1 2538.95  126.49
   1   1  -1 2469.05  126.39
  -1   1   1 2508.05  126.89
   1  -1  -1 2634.54  127.19
  -1  -1   1 2416.66  126.39
   1  -1  -1 2585.04  126.49
   1  -1  -1 2765.32  126.59
  -1  -1   1 2796.82  126.49
   1   1   0  164.38    7.80
  -1   1   0  158.18    7.80
  -1   1   0  157.18    7.80
   1   1   0  166.48    7.80
  -1  -1   0  154.68    7.80
  -1   1  -1  563.44   29.80
  -1   1  -1  609.34   29.90
   1   1   1  626.04   30.00
   1   1   1  592.44   29.90
   1   1   1  646.74   29.90
  -1  -1  -1  579.84   29.90
   1  -1   1  658.03   29.90
  -1  -1  -1  624.24   29.90
   1  -1   1  630.94   29.90
  -1  -1  -1  639.04   30.00
  -1   1  -2 2415.96  118.59
   1   1   2 2354.86  119.09
   1   1   2 2370.96  118.59
   1   1   2 2407.26  118.49
  -1  -1  -2 2431.86  118.99
  -1  -1  -2 2446.96  118.49
   1  -1   2 2425.06  118.49
   1  -1   2 2768.32  118.99
   1   1   3 1205.18   59.29
   1   1   3 1269.87   59.09
  -1   1  -3 1318.77   59.09
   1   1   3 1178.78   59.09
  -1   1  -3 1224.38   59.09
  -1  -1  -3 1140.39   59.09
  -1  -1  -3 1224.28   59.29
   1  -1   3 1261.57   59.09
   1  -1   3 1231.68   59.09
  -1  -1  -3 1138.69   59.09
   1   1   4  356.66   17.90
  -1   1  -4  367.86   18.00
  -1   1  -4  394.86   18.00
   1   1   4  329.47   18.00
   1   1   4  371.86   18.30
   1  -1   4  378.36   17.90
  -1  -1  -4  330.57   17.90
  -1  -1  -4  395.76   18.30
   1  -1   4  346.27   17.90
  -1  -1  -4  375.36   17.90
   1   1   5  121.59    6.90
  -1   1  -5  125.59    6.30
   1   1   5  111.19    6.30
  -1   1  -5  125.59    6.40
   1   1   5  115.19    6.40
   1  -1   5  107.59    6.30
   1  -1   5  117.49    6.30
  -1  -1  -5  121.69    6.30
  -1  -1  -5  123.89    6.80
  -1  -1  -5  120.99    6.40
  -1   1  -6  479.65   23.30
  -1   1  -6  479.65   23.70
   1   1   6  468.55   23.30
   1   1   6  449.66   23.30
  -1   1  -6  508.75   23.30
   1  -1   6  468.95   23.20
  -1  -1  -6  479.35   23.70
   1  -1   6  429.06   23.20
  -1  -1  -6  465.95   23.30
  -1  -1  -6  489.45   23.30
  -1   1  -7   65.89    4.30
   1   1   7   65.19    4.40
  -1   1  -7   67.39    4.90
  -1  -1  -7   62.19    4.20
   1  -1   7   71.89    4.30
   1  -1   7   73.59    4.30
   1   1   8   21.30    2.40
  -1   1  -8   28.10    2.50
  -1  -1  -8   23.20    2.30
   1  -1   8   23.60    2.30
  -1   1  -9   14.50    2.10
   1   1   9   12.30    2.30
   1  -1   9    9.80    1.90
  -1  -1  -9   15.10    2.10
  -1   1 -10   40.10    4.00
   1   1  10   39.90    4.10
  -1  -1 -10   32.60    3.20
   1   1  11    9.00    2.30
  -1   1 -11    7.90    2.40
   1  -1  11    7.10    2.00
  -1  -1 -11    7.20    2.40
  -1   1 -12   -0.10    2.40
   1   1  12    0.00    2.20
   1  -1  12    2.50    2.00
  -1  -1 -12   -5.30    2.30
  -1   1 -13    0.50    2.70
   1   1  13    1.90    2.40
  -1  -1 -13   -2.40    2.50
   1  -1  13    2.80    2.10
   1   1  14   -1.50    2.40
  -1   1 -14   -2.60    2.70
   1  -1  14    2.10    2.20
   1   2 -14    2.10    3.00
  -1   2  14    4.00    2.70
  -1  -2  14    3.60    2.20
   1  -2 -14   -2.70    2.60
  -1   2  13    7.80    2.80
   1   2 -13    3.40    2.60
   1  -2 -13    5.20    2.60
  -1  -2  13    4.80    2.10
   1   2 -12    3.60    2.60
  -1   2  12    9.60    2.70
   1  -2 -12    1.00    2.20
  -1  -2  12    4.60    1.90
   1   2 -11   -1.80    2.10
  -1   2  11   -0.50    2.30
   1  -2 -11   -0.80    2.00
  -1  -2  11    1.50    1.70
  -1   2  10    0.60    2.20
   1   2 -10    0.70    2.20
   1  -2 -10   -0.70    2.00
  -1  -2  10    0.80    1.60
   1   2  -9  216.58   11.60
  -1   2   9  225.28   11.70
  -1  -2   9  217.18   11.30
   1  -2  -9  213.88   11.50
  -1   2   8  119.19    7.10
   1   2  -8  119.29    6.90
  -1  -2   8  124.59    6.60
  -1  -2   8  124.49    6.60
   1  -2  -8  114.29    6.80
   1   2  -7   42.90    3.30
  -1   2   7   40.90    3.50
  -1  -2   7   45.30    3.10
  -1  -2   7   47.30    3.10
   1  -2  -7   39.90    3.20
  -1   2   6   19.30    1.90
  -1   2   6   19.40    2.70
  -1   2   6   15.70    1.90
   1   2  -6   12.10    1.60
   1   2  -6   16.90    1.70
  -1  -2   6   15.30    1.50
   1  -2  -6   11.90    1.60
  -1  -2   6   11.10    1.40
   1  -2  -6   22.50    2.70
   1  -2  -6    9.00    1.40
   1   2  -5  227.58   11.90
  -1   2   5  199.08   12.00
  -1   2   5  242.78   12.00
   1   2  -5  239.38   12.00
  -1   2   5  244.88   12.60
  -1  -2   5  261.97   11.90
   1  -2  -5  244.48   12.40
  -1  -2   5  249.28   11.90
   1  -2  -5  250.97   12.00
   1  -2  -5  221.58   11.90
  -1   2   4  295.97   16.90
   1   2  -4  335.87   16.80
   1   2  -4  373.26   16.80
  -1   2   4  337.17   17.20
  -1   2   4  352.66   16.80
   1  -2  -4  320.77   16.80
  -1  -2   4  351.16   16.70
   1  -2  -4  357.86   16.80
   1  -2  -4  336.47   17.10
  -1  -2   4  350.26   16.70
  -1   2   3   78.39    4.60
  -1   2   3   77.29    4.20
   1   2  -3   82.29    4.10
  -1   2   3   74.89    4.20
   1   2  -3   75.59    4.10
   1  -2  -3   80.59    4.50
  -1  -2   3   74.39    4.00
  -1  -2   3   78.89    4.00
   1  -2  -3   76.49    4.10
   1  -2  -3   82.19    4.10
   1   2  -2 1714.53   81.19
  -1   2   2 1650.23   81.49
  -1   2   2 1636.74   81.29
   1   2  -2 1681.03   81.29
  -1   2   2 1627.84   81.29
  -1  -2   2 1696.93   81.19
   1  -2  -2 1552.74   81.19
   1  -2  -2 1744.63   81.29
  -1  -2   2 1781.62   81.29
   1  -2  -2 1714.63   81.49
   1   2  -1  118.59    5.80
  -1   2   1  114.09    5.80
  -1   2   1  114.69    6.10
  -1   2   1  119.39    5.80
   1   2  -1  124.79    5.80
   1  -2  -1  118.59    6.10
   1   2   0    3.00    0.40
   1   2   0    5.00    0.40
   1   2   1 1027.90   50.59
   1   2   1 1023.00   50.29
  -1   2  -1 1010.00   50.29
  -1   2  -1 1068.69   50.39
   1   2   1 1085.79   50.39
  -1  -2  -1 1061.59   50.49
  -1  -2  -1 1006.30   50.29
   1   2   2  520.35   24.20
   1   2   2  499.45   24.50
  -1   2  -2  468.35   24.10
   1   2   2  503.65   24.20
  -1   2  -2  494.35   24.20
  -1  -2  -2  499.95   24.20
   1  -2   2  491.85   24.10
  -1  -2  -2  508.85   24.10
  -1  -2  -2  489.15   24.40
   1  -2   2  498.05   24.10
   1   2   3   47.80    3.10
  -1   2  -3   51.29    2.80
  -1   2  -3   51.09    2.90
   1   2   3   49.60    2.90
   1   2   3   47.50    3.50
   1  -2   3   54.49    2.70
  -1  -2  -3   51.39    3.30
  -1  -2  -3   49.99    2.80
  -1  -2  -3   46.90    2.90
   1  -2   3   50.09    2.80
  -1   2  -4   83.69    4.20
   1   2   4   76.29    4.80
  -1   2  -4   74.89    4.30
   1   2   4   72.29    4.40
   1   2   4   71.19    4.20
  -1  -2  -4   73.39    4.30
   1  -2   4   75.09    4.20
  -1  -2  -4   78.79    4.60
   1  -2   4   81.59    4.10
   1   2   5   97.19    6.10
   1   2   5   96.69    5.60
  -1   2  -5   97.99    5.40
   1   2   5  102.79    5.50
  -1   2  -5   97.59    5.40
  -1  -2  -5  103.49    5.80
  -1  -2  -5   96.99    5.50
  -1  -2  -5  103.69    5.40
   1  -2   5   99.19    5.30
   1  -2   5  104.19    5.30
  -1   2  -6   59.19    3.80
   1   2   6   60.39    4.70
   1   2   6   55.99    3.90
  -1   2  -6   60.89    3.80
   1  -2   6   57.09    3.60
  -1  -2  -6   57.49    3.80
   1  -2   6   67.69    3.70
  -1  -2  -6   54.69    3.70
   1   2   7  184.58    9.50
   1   2   7  164.08   10.10
  -1   2  -7  178.38    9.40
   1  -2   7  182.48    9.20
  -1  -2  -7  173.78    9.30
   1  -2   7  181.38    9.20
   1   2   8   74.19    5.00
  -1   2  -8   72.09    4.80
  -1  -2  -8   70.99    4.70
   1  -2   8   70.49    4.50
  -1   2  -9   98.59    6.20
   1   2   9   93.49    6.20
   1  -2   9  101.39    5.90
  -1  -2  -9   98.79    6.10
   1   2  10    9.00    2.40
  -1   2 -10    5.60    2.20
  -1  -2 -10    1.30    2.00
   1  -2  10    7.30    1.80
   1   2  11   -1.00    2.30
  -1   2 -11    0.80    2.20
   1  -2  11    2.30    1.70
  -1  -2 -11   -4.80    2.00
   1   2  12    2.40    2.30
  -1   2 -12   -3.30    2.30
   1  -2  12    2.30    1.80
   1   2  13    2.10    2.50
  -1   2 -13   -2.60    2.60
   1  -2  13   -1.90    1.80
  -1   2 -14    1.60    2.90
   1   2  14    2.90    2.60
   1  -2  14    1.60    2.10
  -1  -2 -14   -1.50    2.30
  -1   3  14    9.90    3.10
   1   3 -14    4.50    3.00
  -1  -3  14    6.30    2.10
  -1   3  13    2.00    2.90
   1   3 -13   -2.10    2.60
  -1  -3  13    0.90    1.80
   1   3 -12    1.00    2.50
  -1   3  12   -0.90    2.50
  -1  -3  12    1.40    1.70
   1  -3 -12   -1.50    2.20
   1   3 -11   -2.20    2.10
  -1   3  11   -0.50    2.40
   1  -3 -11   -2.20    1.90
  -1  -3  11   -1.20    1.50
  -1   3  10   17.60    2.80
   1   3 -10   17.80    2.60
   1  -3 -10   16.70    2.40
  -1  -3  10   18.20    2.00
  -1   3   9   62.19    5.00
   1   3  -9   56.79    4.80
  -1  -3   9   63.99    4.30
  -1  -3   9   61.99    4.20
   1  -3  -9   66.29    4.50
  -1   3   8   -4.20    2.00
   1   3  -8   -3.20    1.80
   1  -3  -8    6.10    1.60
  -1  -3   8   -1.30    1.30
  -1  -3   8    0.40    1.30
   1   3  -7   12.80    1.90
  -1   3   7   14.90    2.10
  -1   3   7   19.40    3.10
   1  -3  -7   12.60    1.70
  -1  -3   7   16.30    1.50
   1  -3  -7   14.50    1.70
  -1  -3   7   17.20    1.60
  -1   3   6   77.79    4.90
  -1   3   6   81.39    5.70
   1   3  -6   83.99    4.70
   1   3  -6   85.89    4.80
  -1  -3   6   89.49    4.50
   1  -3  -6   78.49    4.70
   1  -3  -6   74.59    4.70
  -1  -3   6   84.39    4.40
  -1   3   5   12.70    2.50
   1   3  -5    8.10    1.20
  -1   3   5   11.40    1.40
  -1   3   5    7.20    1.50
   1   3  -5    8.00    1.30
  -1  -3   5    9.10    0.90
   1  -3  -5    7.30    1.20
   1  -3  -5    9.10    1.20
  -1  -3   5   10.50    1.00
   1  -3  -5   12.20    2.10
   1   3  -4   58.39    3.20
  -1   3   4   58.59    4.00
   1   3  -4   58.79    3.30
  -1   3   4   51.19    3.50
  -1   3   4   53.99    3.30
   1  -3  -4   52.09    3.20
   1  -3  -4   55.69    3.20
   1  -3  -4   57.19    3.70
  -1  -3   4   54.99    2.90
  -1  -3   4   57.19    2.90
  -1   3   3   33.30    2.20
  -1   3   3   33.60    3.00
  -1   3   3   30.80    2.30
   1   3  -3   31.50    2.10
   1   3  -3   32.20    2.00
   1  -3  -3   32.50    2.70
   1  -3  -3   32.30    2.00
   1   3  -2    5.30    0.60
  -1   3   2    5.20    0.80
   1   3  -2    5.10    0.50
  -1   3   2    5.80    0.80
  -1   3   2    6.00    1.60
   1  -3  -2    5.10    0.50
   1  -3  -2    5.40    0.50
   1  -3  -2    7.50    1.40
  -1   3   1    0.70    0.40
  -1   3   1    0.70    1.10
  -1   3   1    1.10    0.40
   1   3   1   35.10    2.60
   1   3   1   37.00    1.90
   1   3   1   36.90    2.10
   1   3   2  592.34   26.90
  -1   3  -2  566.24   26.90
  -1   3  -2  563.04   26.80
   1   3   2  550.74   27.30
   1   3   2  522.55   27.00
  -1  -3  -2  519.35   26.90
  -1  -3  -2  566.34   26.80
  -1  -3  -2  550.04   27.30
   1   3   3  132.69    6.50
   1   3   3  125.89    7.00
  -1   3  -3  127.09    6.40
  -1   3  -3  124.09    6.30
   1   3   3  126.89    6.60
   1  -3   3  124.29    6.20
  -1  -3  -3  128.59    6.40
  -1  -3  -3  122.59    6.40
  -1  -3  -3  129.29    6.90
   1   3   4  306.27   15.30
   1   3   4  304.57   15.80
  -1   3  -4  295.17   15.20
  -1   3  -4  334.47   15.20
   1   3   4  275.77   15.30
   1  -3   4  315.77   15.10
   1  -3   4  307.67   15.10
  -1  -3  -4  315.67   15.20
  -1  -3  -4  306.67   15.70
  -1  -3  -4  324.87   15.30
   1   3   5    5.50    1.40
  -1   3  -5    7.40    1.30
   1   3   5    8.30    1.30
   1   3   5   11.00    2.40
  -1   3  -5    9.40    1.20
   1  -3   5    7.40    0.90
  -1  -3  -5    6.50    1.20
   1  -3   5    8.60    1.00
  -1  -3  -5    5.90    1.10
  -1  -3  -5   10.30    3.00
   1   3   6  106.59    6.30
  -1   3  -6  105.09    6.50
   1   3   6  111.99    6.90
  -1   3  -6  120.79    6.20
   1  -3   6  117.09    6.00
  -1  -3  -6  112.89    6.10
   1  -3   6  111.59    5.90
  -1  -3  -6  117.29    6.20
   1   3   7    4.80    1.90
   1   3   7   12.00    3.10
  -1   3  -7    1.50    1.60
   1  -3   7    4.30    1.20
   1  -3   7    6.20    1.30
  -1   3  -8   33.30    3.00
   1   3   8   38.10    3.40
   1   3   8   37.80    5.00
   1  -3   8   28.10    3.00
   1  -3   8   37.50    2.70
  -1   3  -9   11.40    2.30
   1   3   9   12.60    2.50
   1  -3   9   10.70    1.60
  -1   3 -10   12.50    2.40
   1   3  10    9.60    2.40
   1  -3  10   12.90    1.80
   1   3  11   -0.40    2.30
  -1   3 -11    3.40    2.20
  -1  -3 -11    1.60    1.90
   1  -3  11    1.40    1.60
  -1   3 -12    7.40    2.60
   1   3  12   13.40    2.90
   1  -3  12    5.40    1.90
  -1  -3 -12    6.80    2.20
  -1   3 -13    2.90    2.70
   1   3  13    5.60    2.90
  -1  -3 -13    1.40    2.20
   1  -3  13    1.50    1.90
  -1   4  13    1.00    2.80
   1   4 -13   -1.50    2.70
   1  -4 -13    1.40    2.10
  -1  -4  13    0.40    1.60
  -1   4  12    8.60    2.90
   1   4 -12    5.80    2.70
   1  -4 -12    1.30    1.90
  -1  -4  12    6.50    1.60
  -1   4  11    4.50    2.60
   1   4 -11    0.40    2.20
  -1  -4  11   -0.50    1.30
  -1   4  10   28.50    3.30
   1   4 -10   25.50    3.00
  -1  -4  10   29.70    2.70
  -1   4   9   25.60    4.50
   1   4  -9   20.30    2.60
  -1   4   9   20.00    3.00
  -1  -4   9   20.80    1.90
  -1  -4   9   21.60    1.90
  -1   4   8    5.60    3.40
  -1   4   8   -1.20    2.20
   1   4  -8   -2.10    1.70
  -1  -4   8    0.20    1.00
  -1  -4   8   -1.10    1.10
  -1   4   7   15.10    2.20
  -1   4   7   20.20    3.30
   1   4  -7   14.90    1.90
  -1  -4   7   15.70    1.40
  -1  -4   7   15.20    1.60
   1  -4  -7   18.00    1.80
   1   4  -6   15.20    1.70
  -1   4   6   18.20    2.00
   1   4  -6   15.40    1.60
  -1   4   6   16.60    2.90
  -1  -4   6   14.20    1.30
   1  -4  -6   13.60    1.50
  -1  -4   6   14.40    1.30
  -1   4   5   14.20    1.60
  -1   4   5   14.20    1.70
  -1   4   5   18.70    2.90
   1   4  -5   21.60    1.80
   1   4  -5   15.90    1.50
   1  -4  -5   14.20    1.30
   1  -4  -5   16.10    1.60
  -1   4   4   42.50    3.70
  -1   4   4   44.80    2.80
  -1   4   4   39.00    3.00
   1   4  -4   42.90    2.70
   1   4  -4   42.20    2.60
   1  -4  -4   45.70    3.40
   1  -4  -4   43.40    2.50
   1  -4  -4   43.70    2.50
   1   4  -3   78.49    4.30
   1   4  -3   80.79    4.30
  -1   4   3   86.99    4.40
  -1   4   3   81.49    5.00
  -1   4   3   83.29    4.50
   1  -4  -3   83.69    4.90
   1  -4  -3   82.09    4.10
  -1   4   2   -0.30    1.50
   1   4  -2   -0.40    0.40
   1   4  -2   -0.30    0.30
  -1   4   2   -0.60    0.60
  -1   4   2   -0.30    0.70
  -1   4   1   18.40    1.20
  -1   4   1   18.50    1.20
  -1   4   1   20.50    2.20
  -1   4   0   25.90    2.20
   1   4   1   42.90    2.40
   1   4   1   42.30    2.20
   1   4   1   40.30    3.20
   1   4   2  494.45   22.80
  -1   4  -2  461.05   22.70
   1   4   2  434.76   22.80
  -1   4  -2  481.85   22.70
   1   4   2  467.35   23.40
   1   4   3  263.47   13.50
   1   4   3  244.08   12.90
  -1   4  -3  257.87   12.70
   1   4   3  262.07   12.90
  -1   4  -3  264.07   12.80
  -1  -4  -3  268.37   12.70
  -1  -4  -3  252.97   13.30
  -1  -4  -3  267.47   12.70
  -1   4  -4   22.20    1.70
   1   4   4   18.40    1.80
   1   4   4   23.70    2.80
  -1   4  -4   23.10    1.90
   1   4   4   21.80    2.00
  -1  -4  -4   22.70    1.60
  -1  -4  -4   23.80    1.80
   1   4   5    9.10    1.60
  -1   4  -5   11.30    1.40
   1   4   5   15.70    2.60
  -1   4  -5   12.60    1.30
   1  -4   5   11.60    0.90
  -1  -4  -5   13.10    1.30
   1  -4   5   11.60    0.90
  -1  -4  -5    8.90    1.10
   1   4   6   -1.30    1.50
   1   4   6    1.20    2.50
  -1   4  -6    0.00    1.20
  -1  -4  -6   -1.10    0.90
  -1  -4  -6    1.00    1.10
   1  -4   6    0.30    0.70
   1  -4   6    0.50    0.60
   1   4   7  110.49    7.20
  -1   4  -7  129.49    6.90
   1   4   7  128.69    8.00
   1  -4   7  122.79    6.30
  -1  -4  -7  112.59    6.60
  -1  -4  -7  125.69    6.70
   1  -4   7  120.49    6.30
   1   4   8   12.20    2.50
   1   4   8   22.30    4.00
  -1   4  -8   16.90    2.20
   1  -4   8   10.30    1.40
  -1  -4  -8   14.50    1.90
   1  -4   8   15.90    1.60
  -1   4  -9   32.70    3.10
   1   4   9   35.40    3.40
   1   4   9   31.20    4.60
   1  -4   9   35.20    2.80
  -1  -4  -9   34.10    3.30
   1   4  10    3.80    2.50
  -1   4 -10   -0.20    2.10
   1  -4  10    0.40    1.20
  -1  -4 -10    1.20    1.60
   1   4  11   -1.60    2.40
  -1   4 -11    1.70    2.30
  -1  -4 -11   -1.60    1.70
   1  -4  11    0.70    1.40
   1   4  12   22.10    3.30
  -1   4 -12   23.70    3.20
   1  -4  12   30.60    3.10
  -1  -4 -12   21.80    2.80
  -1   4 -13    5.00    2.70
   1   4  13    6.30    2.90
  -1  -4 -13    0.20    2.00
   1  -4  13    1.80    1.70
   1   5 -13   -2.50    2.70
  -1   5  13    4.90    3.00
   1  -5 -13    2.60    2.00
  -1   5  12    6.60    3.00
   1   5 -12    1.10    2.60
   1  -5 -12    3.00    1.90
  -1   5  11    2.70    2.60
   1   5 -11    1.60    2.30
  -1  -5  11    3.60    1.10
   1  -5 -11    2.40    1.70
  -1   5  10   -1.50    3.30
   1   5 -10    1.80    2.10
  -1   5  10    4.50    2.50
  -1  -5  10    1.30    0.90
   1  -5 -10    0.70    1.50
  -1   5   9   34.70    3.40
  -1   5   9   39.00    5.20
   1   5  -9   34.10    3.10
  -1  -5   9   39.40    2.40
   1  -5  -9   37.00    3.20
  -1   5   8   -5.30    2.00
   1   5  -8   -2.50    1.60
  -1   5   8   -0.30    3.00
   1  -5  -8   -0.10    1.20
   1  -5  -8   -1.50    1.20
  -1  -5   8   -1.10    0.60
  -1   5   7   -2.40    1.70
  -1   5   7    4.20    3.10
   1   5  -7    1.60    1.50
   1  -5  -7    0.40    1.10
   1  -5  -7    1.70    1.10
  -1   5   6   -1.60    2.70
   1   5  -6    0.40    1.20
  -1   5   6   -1.00    1.60
   1  -5  -6    0.40    0.80
   1  -5  -6    0.80    0.90
  -1   5   5    8.10    2.60
  -1   5   5    5.80    1.50
   1   5  -5    9.90    1.30
   1   5  -5    8.80    1.20
   1  -5  -5    6.40    0.80
   1  -5  -5    7.00    0.90
  -1   5   4   38.10    3.60
  -1   5   4   37.20    2.90
   1   5  -4   39.40    2.50
   1   5  -4   38.60    2.50
  -1   5   4   40.90    2.70
   1  -5  -4   37.70    2.00
   1  -5  -4   39.00    2.00
  -1   5   3   28.50    3.30
  -1   5   3   28.40    2.20
   1   5  -3   31.20    1.90
  -1   5   3   33.40    2.20
   1   5  -3   28.30    1.90
  -1   5   2   46.90    2.80
  -1   5   2   51.39    3.80
  -1   5   2   50.99    2.80
   1   5  -2   49.70    2.50
  -1   5   1   24.60    1.50
  -1   5   1   24.10    2.60
  -1   5   1   25.20    1.50
   1   5   0   32.50    2.90
   1   5   0   31.60    1.60
  -1   5   0   26.60    2.60
   1   5   1    0.90    0.40
   1   5   1    0.10    0.60
   1   5   1    1.00    1.50
   1   5   2    8.00    2.00
  -1   5  -2    4.80    0.40
   1   5   2    4.50    0.90
  -1   5  -2    5.50    0.60
   1   5   2    5.20    0.80
   1   5   3   14.90    1.40
   1   5   3   18.30    1.70
   1   5   3   16.50    2.50
  -1   5  -3   13.70    1.20
  -1   5  -3   14.10    1.40
   1   5   4   60.49    3.50
   1   5   4   54.49    4.60
  -1   5  -4   57.29    3.20
   1   5   4   62.49    3.70
  -1   5  -4   57.09    3.30
  -1  -5  -4   55.39    3.00
  -1  -5  -4   56.09    3.10
   1   5   5   -2.00    1.30
  -1   5  -5   -0.70    1.00
  -1   5  -5   -0.30    0.90
   1   5   5    1.80    2.40
  -1  -5  -5   -0.50    0.60
  -1  -5  -5   -0.40    0.70
   1   5   6   -1.60    1.60
  -1   5  -6   -1.20    1.30
   1   5   6    2.40    2.80
  -1  -5  -6   -1.10    1.00
  -1  -5  -6   -1.40    0.80
  -1   5  -7   14.50    1.90
   1   5   7   15.50    3.50
   1   5   7   14.70    2.40
  -1  -5  -7   13.40    1.60
  -1  -5  -7   12.60    1.50
   1   5   8   18.10    4.00
  -1   5  -8    9.90    2.00
   1   5   8    8.90    2.30
   1  -5   8   12.80    1.30
  -1  -5  -8   14.30    1.60
  -1   5  -9    1.30    2.00
   1   5   9    1.20    3.30
   1   5   9    0.50    2.20
   1  -5   9    1.10    0.80
  -1  -5  -9    0.50    1.40
   1   5  10    3.60    2.50
   1   5  10   -0.10    3.80
  -1   5 -10   -1.10    2.00
  -1  -5 -10   -1.30    1.50
   1  -5  10    1.10    0.90
  -1   5 -11   -1.70    2.20
   1   5  11    4.30    2.70
  -1  -5 -11   -0.20    1.60
   1  -5  11    2.10    1.70
  -1   5 -12   10.70    2.80
   1   5  12    8.80    3.10
  -1  -5 -12    6.90    2.00
   1   6 -12    4.20    2.60
  -1   6  12    4.50    3.00
   1  -6 -12    1.00    1.70
  -1   6  11    1.10    2.70
   1   6 -11    3.70    2.40
   1  -6 -11    0.70    1.60
  -1   6  10    1.60    3.80
   1   6 -10    1.30    2.20
  -1   6  10    2.40    2.50
   1  -6 -10   -0.20    1.30
  -1   6   9    0.10    2.30
  -1   6   9   -1.90    3.30
   1   6  -9    1.40    1.90
   1  -6  -9   -0.80    1.10
  -1   6   8    1.70    2.10
  -1   6   8    2.00    3.10
   1   6  -8    2.80    1.70
   1  -6  -8    1.20    1.00
  -1   6   7   26.40    4.30
   1   6  -7   29.50    2.80
  -1   6   7   22.70    2.60
   1  -6  -7   22.90    1.90
  -1   6   6   32.30    3.40
  -1   6   6   36.90    4.40
   1   6  -6   35.80    2.90
   1  -6  -6   36.00    2.10
   1  -6  -6   34.30    2.10
   1   6  -5    7.80    1.30
  -1   6   5    7.80    1.70
   1   6  -5    6.60    1.20
  -1   6   5    5.60    2.70
  -1   6   4   41.00    3.00
   1   6  -4   37.90    2.60
   1   6  -4   41.50    2.50
  -1   6   4   38.90    4.20
  -1   6   4   37.80    3.10
  -1   6   3    0.40    0.90
   1   6  -3   -0.30    0.70
   1   6  -3   -0.40    0.60
  -1   6   3   -0.10    1.00
  -1   6   3   -0.60    2.20
  -1   6   2   -0.50    2.00
  -1   6   2    0.50    0.80
  -1   6   2    1.30    0.80
  -1   6   1   11.30    1.10
  -1   6   1   10.50    0.90
  -1   6   1   11.40    2.30
   1   6   0    0.50    0.50
  -1   6   0   -1.00    1.60
   1   6   0    0.60    1.80
   1   6   0    1.00    0.30
   1   6   1   16.10    2.40
   1   6   1   13.40    1.20
  -1   6  -1   19.00    2.40
   1   6   2    3.80    2.00
   1   6   2    2.90    0.80
   1   6   2    1.80    0.90
  -1   6  -2    2.40    0.30
  -1   6  -3   19.10    1.60
  -1   6  -3   19.10    1.40
   1   6   3   17.20    1.70
   1   6   3   23.10    2.00
   1   6   3   23.80    3.20
   1   6   4   13.00    2.90
  -1   6  -4   12.10    1.30
   1   6   4    7.40    1.50
  -1   6  -4   12.50    1.20
   1   6   5   -1.90    1.40
  -1   6  -5   -0.70    0.90
  -1   6  -5   -0.20    1.10
   1   6   5   -0.40    2.50
  -1  -6  -5   -0.40    0.40
  -1  -6  -5   -0.90    0.40
   1   6   6   -2.90    1.60
   1   6   6    1.20    2.90
  -1   6  -6   -2.00    1.30
  -1  -6  -6   -2.30    0.80
  -1  -6  -6   -0.50    0.60
   1   6   7    0.40    3.20
   1   6   7   -0.60    1.80
  -1   6  -7    0.30    1.50
  -1  -6  -7   -0.20    0.80
   1   6   8   12.60    3.90
   1   6   8   13.80    2.50
  -1   6  -8   14.10    2.10
  -1  -6  -8   11.10    1.40
   1   6   9   13.90    2.70
  -1   6  -9   10.00    2.30
   1   6   9   14.60    4.20
  -1  -6  -9   13.60    1.60
  -1   6 -10    0.50    2.10
   1   6  10    0.50    4.10
   1   6  10    3.10    2.60
  -1  -6 -10   -0.80    1.40
   1   6  11    5.70    2.90
  -1   6 -11   -3.10    2.30
   1   6  11   -5.90    4.10
  -1  -6 -11   -1.30    1.60
  -1   7  11    4.70    5.10
  -1   7  11   10.80    3.00
  -1   7  10   10.60    4.70
  -1   7  10   11.90    2.90
  -1   7   9    2.40    2.40
  -1   7   9    3.70    3.80
  -1   7   8    3.10    2.10
  -1   7   8   -0.90    3.60
   1   7  -8    1.40    1.70
  -1   7   7    0.30    1.90
  -1   7   7    3.50    3.20
   1   7  -7   -1.30    1.40
  -1   7   6    6.10    1.80
  -1   7   6    8.30    3.40
   1   7  -6    6.60    1.50
   1   7  -5   25.70    2.40
  -1   7   5   24.80    2.40
  -1   7   5   28.50    3.90
  -1   7   4    3.80    2.70
   1   7  -4    2.80    1.00
  -1   7   4    2.60    1.40
   1   7  -4    2.80    0.90
  -1   7   3   18.10    1.70
   1   7  -3   19.80    1.50
  -1   7   3   25.50    3.70
   1   7  -3   18.90    1.50
  -1   7   3   20.10    2.10
  -1   7   2   42.00    2.90
  -1   7   2   49.80    4.50
  -1   7   2   43.40    2.80
   1   7  -1   74.09    5.40
  -1   7   1   69.09    3.80
  -1   7   1   69.69    3.90
  -1   7   1   79.49    5.40
   1   7   0   13.60    1.40
   1   7   0   26.50    3.30
   1   7   0   18.00    1.20
  -1   7   0   21.70    3.00
   1   7   1   35.20    2.20
  -1   7  -1   34.60    3.70
   1   7   1   45.50    4.20
   1   7   1   35.80    2.40
   1   7   2    4.40    2.60
   1   7   2    2.60    1.00
   1   7   2    2.60    0.90
   1   7   3    3.00    2.80
   1   7   3    2.70    1.20
  -1   7  -3    2.40    0.80
  -1   7  -3    3.40    0.70
   1   7   3    3.30    1.70
  -1   7  -4    0.60    1.10
   1   7   4    0.70    1.30
  -1   7  -4    0.70    0.90
   1   7   4   -1.20    2.50
   1   7   5   77.69    5.00
  -1   7  -5   82.89    4.60
   1   7   5   78.79    6.40
   1   7   6    4.30    3.00
   1   7   6    5.40    1.80
  -1   7  -6    2.70    1.40
   1   7   7    8.20    3.60
  -1   7  -7    8.80    1.70
   1   7   7    3.10    1.90
   1   7   8    1.10    3.50
  -1   7  -8    2.90    2.30
   1   7   8    1.30    2.10
   1   7   9    5.80    2.50
   1   7   9    7.00    4.30
   1   7  10   29.50    6.00
   1   7  10   45.00    4.10
  -1   8   9   -3.50    3.80
  -1   8   9    2.00    2.30
  -1   8   8    3.90    2.30
  -1   8   8    1.20    3.90
  -1   8   7   10.10    4.10
  -1   8   7   12.80    2.20
  -1   8   6    2.70    3.40
  -1   8   6    5.90    1.90
  -1   8   5    1.60    1.50
  -1   8   5    3.00    3.00
  -1   8   4    1.70    1.30
  -1   8   4    2.30    2.90
  -1   8   3    3.40    3.00
  -1   8   3    3.80    1.30
  -1   8   2   44.50    3.20
  -1   8   2   44.90    4.70
   1   8  -2   39.10    4.40
  -1   8   1    4.90    2.80
   1   8  -1    5.20    2.70
   1   8   0  223.68   12.40
  -1   8   0  219.58   12.20
   1   8   1   66.99    5.40
  -1   8  -1   57.09    5.10
   1   8   2    2.60    1.00
   1   8   2    3.00    2.70
  -1   8  -2    0.90    2.20
   1   8   3    4.00    1.20
   1   8   3    1.60    2.80
   1   8   4    7.40    3.20
   1   8   4    7.30    1.50
   1   8   5    0.30    1.50
   1   8   5    3.20    3.20
   1   8   6    0.70    1.70
   1   8   6    3.30    3.20
   1   8   7    1.30    2.00
   1   8   7   -1.30    3.50
   1   8   8    3.20    4.10
   1   8   8    1.20    2.20
   1   8   9   -3.10    4.10
   1   8   9    4.40    2.50
  -1   9   8    5.20    4.30
  -1   9   7    5.70    4.20
  -1   9   6    3.90    3.80
  -1   9   5    8.30    3.70
  -1   9   4   13.00    3.70
   1   9  -3    7.50    2.80
  -1   9   3   12.20    3.60
   1   9  -2   11.90    3.00
  -1   9   2   15.80    3.50
  -1   9   1   21.40    3.80
   1   9  -1   13.80    3.30
  -1   9   0    8.20    2.90
   1   9   0   15.30    3.40
  -1   9  -1   36.80    4.30
   1   9   1   42.20    5.10
   1   9   2    9.50    3.50
  -1   9  -2    9.10    2.90
  -1   9  -3    0.00    2.30
   1   9   3    1.40    3.00
   1   9   4   17.70    4.00
   1   9   5    4.90    3.60
   1   9   6    2.00    3.80
   1   9   7    9.70    4.50
  -1  10   5    7.30    3.90
  -1  10   4    2.00    3.50
   1  10  -4   -0.90    2.80
   1  10  -3   39.80    5.00
  -1  10   3   49.90    5.80
  -1  10   2   32.00    4.70
   1  10  -2   34.50    4.80
   1  10  -1    2.90    3.00
  -1  10   1    4.40    3.20
   1  10   0    2.90    3.00
  -1  10   0    0.70    3.00
   1  10   1    9.60    3.80
  -1  10  -1    9.50    3.10
   1  10   2   19.20    4.30
  -1  10  -2   13.70    3.30
  -1  10  -3    3.00    2.80
   1  10   3    5.50    3.80
  -1  10  -4    5.30    2.90
   1  10   4    4.50    3.70
   1  10   5    3.10    3.60
  -1  10  -5    6.10    2.90
   2   0 -14   -0.30    2.70
  -2   0  14    1.70    2.50
   2   0 -13    1.70    2.50
  -2   0  13    2.90    2.30
  -2   0  12   92.09    6.30
   2   0 -12   89.59    6.40
  -2   0  11    3.30    2.20
   2   0 -11    7.50    2.50
  -2   0  10    9.10    2.20
   2   0 -10   13.30    2.30
   2   0  -9   -0.30    1.80
  -2   0   9   -1.00    1.80
  -2   0   8   16.80    2.10
   2   0  -8   18.50    2.20
   2   0  -7   -0.30    1.30
  -2   0   7   -0.10    1.40
  -2   0   7   -1.10    1.20
  -2   0   6   -2.00    1.10
   2   0  -6   -0.10    1.10
   2   0  -6   -1.20    1.80
   2   0  -6   -3.50    1.20
  -2   0   6   -1.60    1.30
  -2   0   5   -2.40    1.20
   2   0  -5   -1.20    1.20
   2   0  -5   -0.60    1.00
  -2   0   5   -1.80    1.00
   2   0  -4    8.50    1.10
  -2   0   4    4.80    1.20
   2   0  -4    5.70    1.10
  -2   0   4    6.00    1.10
  -2   0   3   -1.80    0.90
  -2   0   3   -0.40    0.90
   2   0  -3   -0.10    0.80
   2   0  -3   -0.50    0.90
   2   0  -2 3535.55  176.88
  -2   0   2 3871.21  177.08
   2   0  -2 3554.44  176.88
   2   0  -1    2.10    0.40
  -2   0   1    1.40    0.40
   2   0  -1    2.00    0.40
  -2   0   1    2.60    0.40
  -2   0   0 2403.76  118.99
   2   0   0 2524.25  118.99
  -2   0   0 2501.45  118.99
   2   0   0 2394.86  118.99
   2   0   1    0.60    0.50
  -2   0  -1   -0.60    0.60
   2   0   1   -1.30    0.70
  -2   0  -1    0.70    0.50
  -2   0  -1    0.20    0.50
   2   0   1   -0.40    0.50
   2   0   2 5883.71  283.57
   2   0   2 5591.64  284.17
  -2   0  -2 6343.27  283.77
   2   0   2 5650.94  283.67
  -2   0  -2 5823.92  284.07
   2   0   3    1.00    1.30
  -2   0  -3    0.50    0.80
  -2   0  -3   -0.10    1.20
   2   0   3    0.40    0.80
  -2   0  -3   -0.40    0.80
   2   0   3    0.40    0.80
   2   0   4    2.20    1.00
  -2   0  -4    0.70    1.00
  -2   0  -4    2.50    1.50
   2   0   4    0.60    1.10
  -2   0  -4    1.90    1.00
   2   0   5    2.00    1.10
  -2   0  -5    1.10    1.00
   2   0   5    1.00    1.20
  -2   0  -5   -0.20    1.10
  -2   0  -5    0.20    1.60
   2   0   6  132.99    7.90
   2   0   6  160.28    7.90
  -2   0  -6  159.98    8.30
  -2   0  -6  157.88    7.90
  -2   0  -6  137.19    8.00
  -2   0  -7    1.50    2.30
  -2   0  -7   -0.50    1.40
   2   0   7    0.10    1.40
  -2   0  -8   27.50    2.40
   2   0   8   18.20    2.20
  -2   0  -9   -1.80    1.60
   2   0   9   -0.60    1.70
   2   0  10    0.30    1.80
  -2   0 -10    2.00    2.10
  -2   0 -11   -2.50    2.20
   2   0  11   -2.40    1.80
  -2   0 -12    9.90    2.70
   2   0  12   12.10    2.40
   2   0  13   -0.80    2.20
   2   0  14    5.80    2.50
  -2   1  14   20.50    3.20
   2   1 -14   16.90    3.30
   2  -1 -14   14.50    3.20
  -2  -1  14   17.30    2.80
  -2   1  13    3.10    2.50
   2   1 -13    0.90    2.70
  -2  -1  13    5.10    2.20
   2  -1 -13    3.00    2.60
  -2   1  12    7.10    2.40
   2   1 -12   10.10    2.70
  -2  -1  12    8.90    2.30
   2  -1 -12   11.70    2.60
  -2   1  11   90.29    6.20
   2   1 -11   85.29    6.10
  -2  -1  11   85.29    5.80
   2  -1 -11   86.49    6.00
  -2   1  10  107.59    6.80
   2   1 -10  104.79    6.70
  -2  -1  10  103.79    6.60
   2  -1 -10  109.59    6.70
  -2   1   9   -2.20    1.90
   2   1  -9   -1.40    1.80
  -2  -1   9    0.10    1.80
   2  -1  -9   -0.40    1.70
  -2   1   8   40.80    3.60
   2   1  -8   56.59    3.80
   2  -1  -8   49.60    3.80
  -2  -1   8   48.80    3.80
  -2   1   7   34.40    3.10
   2   1  -7   34.40    3.00
  -2  -1   7   37.50    2.80
   2  -1  -7   34.00    3.00
  -2  -1   7   32.50    3.00
   2   1  -6  141.99    7.40
  -2   1   6  143.59    7.50
  -2   1   6  130.79    7.40
   2   1  -6  151.78    7.40
   2  -1  -6  136.49    7.40
  -2  -1   6  123.39    7.40
   2  -1  -6  139.79    7.40
   2  -1  -6  140.69    7.90
  -2  -1   6  145.09    7.30
  -2   1   5  173.88    8.90
  -2   1   5  150.18    8.90
   2   1  -5  187.18    8.90
   2   1  -5  180.48    8.90
   2  -1  -5  173.18    8.90
  -2  -1   5  173.98    8.80
  -2  -1   5  172.88    8.90
   2  -1  -5  170.08    8.90
   2  -1  -5  179.18    9.40
   2   1  -4   61.59    3.60
   2   1  -4   58.69    3.60
  -2   1   4   64.79    3.70
  -2   1   4   60.09    3.60
   2  -1  -4   64.29    3.70
   2  -1  -4   67.29    4.00
  -2  -1   4   69.79    3.60
   2  -1  -4   53.79    3.50
  -2  -1   4   70.09    3.60
  -2   1   3   -1.70    0.80
   2   1  -3   -0.40    0.80
  -2   1   3   -0.60    0.80
   2   1  -3   -1.20    0.80
  -2  -1   3   -0.80    0.80
   2  -1  -3    0.10    1.20
  -2  -1   3   -0.70    0.70
   2  -1  -3   -1.00    0.80
   2  -1  -3   -1.00    0.80
  -2   1   2 8513.95  427.26
  -2   1   2 8826.42  426.16
   2   1  -2 8835.12  426.06
   2   1  -2 8460.35  425.96
  -2  -1   2 8775.82  425.96
   2  -1  -2 8540.15  427.06
   2  -1  -2 8182.18  426.06
  -2  -1   2 9541.25  426.16
   2  -1  -2 9611.54  426.16
   2   1  -1  704.33   33.70
  -2   1   1  716.83   33.70
   2   1  -1  725.53   33.70
  -2   1   1  643.34   33.70
  -2   1   1  693.23   33.80
  -2  -1   1  726.13   33.80
   2  -1  -1  689.83   33.80
   2  -1  -1  742.63   33.70
   2  -1  -1  628.44   33.70
  -2  -1   1  685.73   33.70
  -2   1   0 1012.20   50.29
  -2   1   0 1086.49   50.29
  -2   1   0  999.90   50.29
   2   1   0  967.80   50.29
   2   1   0 1110.29   50.39
   2  -1   0 1033.10   50.39
  -2  -1   0 1051.99   50.29
  -2  -1   0 1053.29   50.39
   2  -1   0 1027.40   50.29
  -2   1  -1  779.42   36.80
   2   1   1  792.22   37.00
   2   1   1  681.13   36.80
   2  -1   1  740.53   36.80
   2  -1   1  715.43   36.80
  -2  -1  -1  794.42   37.00
  -2  -1  -1  778.42   36.90
  -2  -1  -1  807.02   36.90
   2   1   2  264.77   13.20
  -2   1  -2  289.47   13.00
   2   1   2  243.78   13.00
   2  -1   2  260.17   13.00
  -2  -1  -2  266.97   13.20
  -2  -1  -2  269.77   13.00
  -2  -1  -2  248.48   13.00
   2  -1   2  281.27   13.00
   2   1   3   32.70    2.20
   2   1   3   33.50    2.40
   2   1   3   33.80    2.60
  -2   1  -3   35.30    2.20
  -2   1  -3   34.20    2.20
  -2  -1  -3   35.00    2.50
  -2  -1  -3   30.70    2.30
   2  -1   3   34.10    2.20
   2  -1   3   37.60    2.10
  -2  -1  -3   34.20    2.20
   2   1   4   -1.00    1.70
  -2   1  -4    0.00    0.90
  -2   1  -4    0.30    1.00
   2   1   4    0.30    1.00
   2   1   4   -2.30    1.10
   2  -1   4   -1.00    0.90
  -2  -1  -4   -0.40    1.40
   2  -1   4    0.20    0.90
  -2  -1  -4   -1.20    1.00
  -2  -1  -4   -0.50    1.00
   2   1   5  670.33   31.60
  -2   1  -5  664.43   31.40
  -2   1  -5  562.24   31.10
   2   1   5  623.34   31.10
  -2   1  -5  660.73   31.10
   2   1   5  652.13   31.20
   2  -1   5  678.03   31.10
  -2  -1  -5  574.94   31.10
   2  -1   5  563.44   31.10
  -2  -1  -5  689.23   31.50
  -2  -1  -5  659.83   31.10
   2   1   6   15.10    1.80
  -2   1  -6   12.10    1.60
  -2   1  -6   13.50    2.20
   2  -1   6   15.00    1.60
  -2  -1  -6   13.00    1.60
  -2  -1  -6    9.00    1.40
  -2  -1  -6   17.30    2.40
   2  -1   6   12.20    1.50
   2   1   7   15.20    2.00
  -2   1  -7   19.30    2.00
  -2   1  -7   24.10    2.90
   2  -1   7   27.40    2.90
   2  -1   7   17.00    1.90
  -2  -1  -7   21.10    2.10
   2   1   8   30.10    2.80
  -2   1  -8   33.20    3.20
  -2  -1  -8   33.50    3.10
   2  -1   8   28.90    3.00
  -2   1  -9   33.50    3.00
   2   1   9   38.10    3.70
  -2  -1  -9   27.70    2.80
   2  -1   9   33.50    3.30
   2   1  10   30.00    3.00
  -2   1 -10   32.30    3.00
  -2  -1 -10   29.40    3.00
   2  -1  10   22.50    2.60
  -2   1 -11    0.00    2.10
   2   1  11    2.70    2.10
   2  -1  11    1.70    1.80
  -2  -1 -11   -3.30    2.00
   2   1  12    2.70    2.20
  -2   1 -12   -3.70    2.30
   2  -1  12   -0.30    1.90
  -2   1 -13   -1.20    2.70
   2   1  13   -0.70    2.40
   2  -1  13    0.40    2.10
   2   1  14    2.30    2.50
  -2  -1 -14    0.30    2.30
   2  -1  14    3.80    2.30
   2   2 -14   -3.50    2.80
  -2   2  14    1.90    2.80
   2  -2 -14   -2.50    2.70
  -2  -2  14   -2.40    2.00
   2   2 -13    1.60    2.60
  -2   2  13    5.60    2.80
  -2  -2  13    0.80    1.90
   2  -2 -13    2.50    2.50
   2   2 -12   -2.00    2.40
  -2   2  12    3.00    2.50
  -2  -2  12    2.70    1.90
   2  -2 -12   -1.00    2.20
   2   2 -11    0.70    2.20
  -2   2  11   -0.40    2.30
  -2  -2  11    1.70    1.70
   2  -2 -11   -2.70    2.00
  -2   2  10   93.89    6.50
   2   2 -10  109.39    6.50
   2  -2 -10   92.69    6.20
  -2  -2  10   97.19    6.00
  -2   2   9   11.10    2.40
   2   2  -9   16.70    2.50
  -2  -2   9   14.80    2.10
   2  -2  -9    9.90    2.10
   2   2  -8   -1.90    1.70
  -2   2   8   -1.20    1.80
  -2  -2   8   -0.70    1.30
  -2  -2   8   -3.00    1.40
   2  -2  -8   -3.10    1.60
   2   2  -7   28.90    2.90
  -2   2   7   22.00    2.30
  -2  -2   7   23.00    2.10
   2  -2  -7   29.70    3.00
   2  -2  -7   20.30    2.10
  -2  -2   7   28.00    2.30
  -2   2   6   49.60    3.40
  -2   2   6   49.20    3.60
   2   2  -6   52.09    3.50
   2   2  -6   55.39    3.30
  -2  -2   6   55.69    3.20
  -2  -2   6   45.50    3.30
   2  -2  -6   53.59    4.00
   2  -2  -6   50.89    3.40
   2  -2  -6   48.90    3.40
  -2   2   5  240.78   12.70
   2   2  -5  234.68   12.50
  -2   2   5  248.38   13.20
  -2   2   5  256.67   12.60
   2   2  -5  259.27   12.60
   2  -2  -5  247.48   13.00
  -2  -2   5  245.48   12.50
  -2  -2   5  269.27   12.50
   2  -2  -5  267.77   12.60
   2  -2  -5  240.98   12.60
   2   2  -4   24.80    2.20
  -2   2   4   28.20    2.30
   2   2  -4   28.70    2.10
  -2   2   4   32.10    3.00
  -2   2   4   23.80    2.40
  -2  -2   4   29.90    2.00
   2  -2  -4   27.20    2.30
   2  -2  -4   30.70    2.70
   2  -2  -4   29.50    2.10
  -2  -2   4   29.20    2.10
  -2   2   3  639.84   30.60
   2   2  -3  667.83   30.50
   2   2  -3  628.34   30.50
  -2   2   3  599.94   30.60
  -2   2   3  636.64   30.90
  -2  -2   3  619.14   30.50
   2  -2  -3  627.54   30.80
   2  -2  -3  627.04   30.50
  -2  -2   3  656.93   30.50
   2  -2  -3  576.54   30.50
   2   2  -2 1759.92   81.19
  -2   2   2 1700.73   81.49
   2   2  -2 1704.63   81.39
  -2   2   2 1694.03   81.19
  -2   2   2 1682.93   81.29
   2  -2  -2 1475.85   81.19
  -2  -2   2 1749.32   81.39
   2  -2  -2 1648.73   81.19
  -2  -2   2 1755.92   81.29
   2  -2  -2 1627.74   81.39
  -2   2   1  114.59    5.50
  -2   2   1  105.39    5.80
  -2   2   1  113.49    5.60
   2   2  -1  114.59    5.50
   2   2  -1  116.19    5.50
  -2  -2   1  106.99    5.40
   2  -2  -1  106.59    5.50
   2  -2  -1  110.49    5.70
   2  -2  -1  113.89    5.40
   2   2   0  440.46   20.20
  -2   2   0  422.96   20.20
  -2   2   0  420.26   20.20
  -2   2   0  420.06   20.30
   2   2   0  376.76   20.20
  -2  -2   0  420.36   20.20
  -2  -2   0  412.66   20.10
  -2   2  -1  612.24   29.80
   2   2   1  644.64   29.90
   2   2   1  638.64   30.20
   2   2   1  538.45   29.90
  -2   2  -1  673.73   29.90
  -2  -2  -1  577.34   29.90
   2  -2   1  625.04   29.80
  -2  -2  -1  618.54   29.80
  -2   2  -2  104.49    5.20
  -2   2  -2  105.59    5.10
   2   2   2  104.69    5.60
   2   2   2   97.79    5.20
   2   2   2  104.49    5.30
  -2  -2  -2  104.89    5.60
   2  -2   2  101.99    5.20
   2  -2   2   99.89    5.10
  -2  -2  -2  103.99    5.30
  -2  -2  -2  101.89    5.20
   2   2   3   78.39    4.30
   2   2   3   77.89    4.80
  -2   2  -3   84.09    4.20
  -2   2  -3   82.89    4.30
   2   2   3   83.59    4.40
   2  -2   3   85.89    4.10
  -2  -2  -3   78.19    4.60
   2  -2   3   76.69    4.20
  -2  -2  -3   74.99    4.30
  -2  -2  -3   78.59    4.20
   2   2   4  354.96   18.40
   2   2   4  384.26   18.00
   2   2   4  373.36   18.00
  -2   2  -4  369.86   17.90
  -2   2  -4  393.26   17.90
   2  -2   4  355.36   17.90
  -2  -2  -4  313.07   17.90
  -2  -2  -4  366.86   18.30
  -2  -2  -4  364.26   17.90
   2   2   5  358.66   18.80
  -2   2  -5  412.76   18.80
   2   2   5  389.16   18.90
   2   2   5  381.86   19.30
  -2   2  -5  388.86   18.80
  -2  -2  -5  402.06   18.80
  -2  -2  -5  353.56   18.70
  -2  -2  -5  379.16   19.20
   2  -2   5  345.17   18.70
   2  -2   5  389.66   18.70
   2   2   6    9.00    1.70
   2   2   6    9.20    2.40
  -2   2  -6    8.20    1.50
   2  -2   6    9.20    1.20
  -2  -2  -6    8.90    1.50
   2  -2   6    8.80    1.30
   2   2   7   65.69    4.20
  -2   2  -7   60.19    4.00
   2   2   7   49.90    4.90
   2  -2   7   61.79    3.80
   2  -2   7   51.29    3.60
  -2   2  -8  450.35   23.50
   2   2   8  483.55   23.70
   2  -2   8  482.35   23.40
   2   2   9   27.60    2.90
  -2   2  -9   23.50    2.70
   2  -2   9   23.30    2.30
  -2   2 -10    2.70    2.10
   2   2  10    3.40    2.30
   2  -2  10    8.40    1.80
   2   2  11   -0.10    2.20
  -2   2 -11    3.50    2.20
   2  -2  11    0.00    1.60
  -2  -2 -11    1.70    1.90
   2   2  12    0.10    2.40
  -2   2 -12    1.40    2.50
  -2  -2 -12    0.00    2.00
   2  -2  12   -0.60    1.80
   2   2  13   -0.70    2.40
  -2   2 -13    0.90    2.70
   2  -2  13    2.10    2.00
  -2  -2 -13   -3.00    2.20
  -2   3  14    2.40    2.80
   2   3 -14    0.30    3.00
  -2  -3  14    0.90    1.90
   2  -3 -14   -0.30    2.60
  -2   3  13    1.30    2.80
   2   3 -13   -2.70    2.60
  -2  -3  13   -0.30    1.80
   2  -3 -13   -2.40    2.30
  -2   3  12    2.30    2.70
   2   3 -12    1.00    2.50
   2  -3 -12    0.30    2.20
  -2  -3  12   -0.10    1.70
  -2   3  11    4.30    2.50
   2   3 -11    0.50    2.20
  -2  -3  11    4.80    1.70
   2  -3 -11    3.90    2.00
   2   3 -10    3.40    2.20
  -2   3  10    1.80    2.40
   2  -3 -10    3.00    1.90
  -2  -3  10    1.60    1.40
   2   3  -9   92.09    5.80
  -2   3   9   88.59    6.10
  -2  -3   9   93.19    5.30
  -2  -3   9   86.09    5.30
   2  -3  -9   85.49    5.70
  -2   3   8   37.40    3.30
   2   3  -8   38.40    3.60
  -2  -3   8   42.60    3.00
  -2  -3   8   34.70    3.10
   2  -3  -8   47.50    3.40
  -2   3   7   11.90    2.80
   2   3  -7   10.10    1.70
  -2   3   7   11.20    2.00
   2  -3  -7    7.50    1.50
  -2  -3   7   12.70    1.40
   2  -3  -7   10.10    1.50
  -2  -3   7   11.60    1.30
   2   3  -6   10.90    1.50
  -2   3   6   15.20    2.90
  -2   3   6    9.60    1.70
   2   3  -6    8.70    1.30
  -2  -3   6   10.10    1.20
   2  -3  -6    9.00    1.30
   2  -3  -6    9.80    1.40
  -2  -3   6   10.40    1.10
   2   3  -5  107.49    5.60
   2   3  -5  103.69    5.50
  -2   3   5  104.69    6.40
  -2   3   5  101.69    5.70
  -2   3   5  105.39    5.70
   2  -3  -5  103.99    5.50
  -2  -3   5  103.49    5.30
   2  -3  -5   97.69    5.50
  -2  -3   5  107.09    5.30
   2  -3  -5   98.69    6.00
   2   3  -4   -1.10    0.90
  -2   3   4    0.10    1.10
   2   3  -4    1.00    0.80
  -2   3   4    1.00    1.10
  -2   3   4    1.10    2.10
   2  -3  -4    2.50    1.60
   2  -3  -4   -0.40    0.90
  -2  -3   4    0.10    0.50
   2  -3  -4    0.30    0.80
  -2  -3   4    0.90    0.50
   2   3  -3  144.59    7.00
  -2   3   3  142.79    7.70
  -2   3   3  134.79    7.10
   2   3  -3  138.19    7.00
  -2   3   3  145.89    7.10
   2  -3  -3  143.49    7.00
   2  -3  -3  130.39    7.00
   2  -3  -3  139.19    7.50
  -2   3   2    9.80    1.00
   2   3  -2    8.20    0.80
  -2   3   2    8.50    0.90
   2   3  -2    8.50    0.80
  -2   3   2    9.60    1.70
   2  -3  -2   12.50    1.50
   2  -3  -2    8.90    0.70
   2   3  -1   97.79    4.70
  -2   3   1   90.49    5.10
  -2   3   1   90.99    4.70
  -2   3   1   96.99    4.80
   2   3  -1   95.99    4.60
  -2   3   0   25.90    1.40
   2   3   0   27.40    1.40
  -2   3   0   25.90    1.40
  -2   3   0   28.50    2.00
   2   3   0   25.10    1.50
  -2   3  -1   26.90    1.40
   2   3   1   28.90    1.50
  -2   3  -1   26.50    1.50
   2   3   1   25.90    2.40
   2   3   1   27.40    1.70
  -2  -3  -1   21.20    1.40
  -2  -3  -1   26.60    1.40
  -2   3  -2  220.88   10.70
   2   3   2  224.48   10.90
   2   3   2  209.18   11.30
  -2   3  -2  216.98   10.70
   2   3   2  212.18   10.80
  -2  -3  -2  221.68   10.80
  -2  -3  -2  224.08   10.70
   2   3   3    0.10    1.00
   2   3   3    2.00    1.80
  -2   3  -3    2.80    0.60
  -2   3  -3    2.60    0.80
   2   3   3    1.30    0.80
   2  -3   3    2.10    0.60
   2  -3   3    1.60    0.40
  -2  -3  -3    1.80    1.50
  -2  -3  -3    1.40    0.80
  -2  -3  -3    1.30    0.60
   2   3   4  183.88    8.90
  -2   3  -4  182.48    8.70
  -2   3  -4  178.18    8.80
   2   3   4  178.38    8.80
   2   3   4  170.68    9.40
  -2  -3  -4  172.18    8.80
   2  -3   4  168.98    8.60
  -2  -3  -4  164.78    8.70
   2  -3   4  167.08    8.50
  -2  -3  -4  165.88    9.20
  -2   3  -5   88.19    4.60
   2   3   5   80.69    4.90
  -2   3  -5   85.79    4.70
   2   3   5   81.39    5.60
   2   3   5   82.89    5.40
  -2  -3  -5   82.09    4.60
   2  -3   5   87.29    4.40
  -2  -3  -5   79.79    4.70
   2  -3   5   85.19    4.50
   2   3   6   17.90    2.80
  -2   3  -6   13.00    1.70
   2   3   6   15.20    2.00
  -2  -3  -6   12.60    1.60
   2  -3   6   16.70    1.70
   2  -3   6   13.80    1.40
  -2  -3  -6   14.40    1.50
   2   3   7    3.60    2.00
  -2   3  -7    0.30    1.70
   2   3   7    5.40    2.90
   2  -3   7    1.80    1.20
   2  -3   7    1.00    1.10
  -2  -3  -7    1.70    1.40
   2   3   8  345.47   19.70
   2   3   8  382.76   18.90
  -2   3  -8  396.66   18.80
   2  -3   8  376.96   18.50
   2  -3   8  365.96   18.50
  -2  -3  -8  357.06   18.60
   2   3   9    4.10    3.20
   2   3   9    5.80    2.30
  -2   3  -9    6.30    2.00
   2  -3   9    3.80    1.40
  -2  -3  -9    4.20    1.70
  -2   3 -10    1.10    2.10
   2   3  10    2.40    2.20
   2  -3  10    0.00    1.40
  -2  -3 -10   -1.30    1.60
   2   3  11    1.50    2.40
  -2   3 -11   -1.20    2.10
   2  -3  11    1.40    1.60
  -2  -3 -11   -0.40    1.80
  -2   3 -12   31.30    3.50
   2   3  12   25.70    3.40
  -2  -3 -12   29.80    3.10
   2  -3  12   37.90    3.60
  -2   3 -13    7.60    2.90
   2   3  13   10.90    3.00
  -2  -3 -13    6.20    2.30
   2  -3  13    6.90    2.00
  -2   4  13    3.40    2.90
   2   4 -13    6.10    2.90
  -2  -4  13    6.50    1.80
   2   4 -12    2.20    2.50
  -2   4  12    0.10    2.60
  -2  -4  12    1.50    1.40
   2   4 -11    5.00    2.40
  -2   4  11    8.80    2.70
   2  -4 -11   -0.20    1.90
  -2  -4  11    6.00    1.50
   2   4 -10   15.30    2.60
  -2   4  10   14.60    2.80
  -2  -4  10   14.80    1.70
   2  -4 -10   13.80    2.20
   2   4  -9   -2.80    1.80
  -2   4   9   -4.00    2.10
  -2  -4   9   -3.80    1.00
  -2  -4   9   -2.70    1.00
   2  -4  -9    0.60    1.60
  -2   4   8   -0.60    2.20
  -2   4   8   11.00    3.40
   2   4  -8    3.50    1.80
   2  -4  -8    9.40    1.70
  -2  -4   8    2.90    1.10
  -2  -4   8    1.70    1.10
  -2   4   7   -5.40    1.70
  -2   4   7    0.50    2.80
   2   4  -7   -1.30    1.40
   2  -4  -7    0.00    1.20
  -2  -4   7   -2.80    0.70
  -2  -4   7   -2.20    0.70
   2   4  -6   13.90    1.50
  -2   4   6   16.00    1.90
   2   4  -6   11.60    1.60
  -2   4   6   16.40    2.90
   2  -4  -6   13.40    1.40
  -2  -4   6   14.70    1.20
  -2  -4   6   14.60    1.30
   2  -4  -6   11.00    1.30
  -2   4   5    0.60    1.30
   2   4  -5    3.40    1.00
  -2   4   5    1.70    2.30
  -2   4   5    2.10    1.20
   2   4  -5    1.20    1.00
   2  -4  -5    1.30    0.90
   2  -4  -5    2.10    0.90
  -2  -4   5    2.80    0.40
  -2   4   4  106.59    6.30
   2   4  -4  123.09    6.10
  -2   4   4  122.59    7.10
   2   4  -4  122.89    6.20
  -2   4   4  129.09    6.30
   2  -4  -4  117.49    6.70
   2  -4  -4  116.09    6.00
  -2   4   3   -1.50    0.90
   2   4  -3   -0.70    0.60
  -2   4   3    0.40    1.60
   2   4  -3   -2.00    0.60
  -2   4   3    0.20    0.90
   2  -4  -3   -0.80    0.40
   2  -4  -3   -0.70    0.40
   2  -4  -3    1.20    1.40
  -2   4   2  184.68    9.40
  -2   4   2  184.78    9.40
   2   4  -2  193.48    9.30
   2   4  -2  195.28    9.20
  -2   4   2  186.18    9.90
  -2   4   1   74.09    4.60
  -2   4   1   80.59    4.00
   2   4  -1   80.09    3.90
  -2   4   1   79.39    4.00
   2   4  -1   79.39    3.90
  -2   4   0   14.70    1.80
  -2   4   0   15.20    1.00
   2   4   0   15.90    1.00
  -2   4   0   15.50    0.90
   2   4   0   13.40    1.10
   2   4   1  526.75   26.40
   2   4   1  512.35   25.90
   2   4   1  554.34   25.80
  -2   4  -1  528.75   25.80
  -2   4  -1  537.95   25.80
   2   4   2  427.96   21.00
   2   4   2  430.46   21.60
  -2   4  -2  435.66   20.90
  -2   4  -2  425.66   20.90
   2   4   2  442.66   21.10
  -2  -4  -2  419.56   20.80
   2   4   3   14.50    1.40
   2   4   3   12.80    1.20
  -2   4  -3   12.30    1.20
  -2   4  -3   16.50    1.20
   2   4   3   16.00    2.40
  -2  -4  -3   14.10    1.10
  -2  -4  -3   13.10    1.40
  -2   4  -4    0.80    0.70
   2   4   4   -0.40    0.90
  -2   4  -4   -0.30    0.90
   2   4   4   -0.90    1.10
   2   4   4   -0.50    1.80
  -2  -4  -4   -0.20    0.80
  -2  -4  -4    0.50    0.60
   2   4   5   -0.20    1.30
  -2   4  -5    2.30    1.10
   2   4   5   -0.40    2.00
  -2   4  -5   -1.20    0.80
   2  -4   5   -0.40    0.50
   2  -4   5    0.10    0.50
  -2  -4  -5   -1.20    0.70
  -2  -4  -5   -0.70    0.90
   2   4   6   -2.10    1.50
   2   4   6    1.80    2.60
  -2   4  -6    0.10    1.30
   2  -4   6   -0.80    0.70
  -2  -4  -6   -0.60    1.20
  -2  -4  -6   -1.50    0.90
   2  -4   6   -2.10    0.80
   2   4   7   94.89    6.50
  -2   4  -7   89.79    5.50
   2   4   7   87.29    5.80
   2  -4   7   86.79    4.90
  -2  -4  -7   88.49    5.10
   2  -4   7   90.69    4.80
   2   4   8   43.70    5.20
   2   4   8   39.70    4.20
  -2   4  -8   45.10    3.80
   2  -4   8   40.10    2.90
   2  -4   8   38.00    3.00
  -2  -4  -8   44.50    3.30
   2   4   9   52.69    6.10
  -2   4  -9   58.19    4.60
   2   4   9   54.89    5.00
   2  -4   9   56.99    3.60
  -2  -4  -9   57.89    4.00
   2   4  10    4.70    2.50
   2   4  10    2.20    3.40
  -2   4 -10    4.20    2.20
   2  -4  10    6.20    1.40
  -2  -4 -10    4.50    1.70
  -2   4 -11   -1.40    2.20
   2   4  11   -0.50    2.40
   2  -4  11    1.30    1.40
  -2  -4 -11    0.60    1.70
   2   4  12    9.50    3.00
  -2   4 -12    8.30    2.60
   2  -4  12    7.30    1.70
  -2  -4 -12    4.10    2.10
   2   4  13    1.10    2.80
  -2   4 -13    1.80    2.70
   2  -4  13    2.10    1.70
  -2  -4 -13    1.10    2.10
  -2   5  13    9.50    3.20
   2   5 -13    1.50    2.90
   2  -5 -13    5.10    2.10
   2   5 -12    3.30    2.60
  -2   5  12    2.70    3.00
   2  -5 -12    0.40    1.80
   2   5 -11    4.30    2.40
  -2   5  11    3.40    2.70
  -2  -5  11    2.80    1.10
   2  -5 -11    0.20    1.60
   2   5 -10   86.59    5.60
  -2   5  10   75.29    6.10
   2  -5 -10   70.59    4.90
  -2  -5  10   77.29    4.30
  -2   5   9    9.90    3.60
   2   5  -9    4.40    2.00
  -2   5   9   11.10    2.50
   2  -5  -9    4.30    1.50
  -2  -5   9    5.40    0.90
  -2   5   8    1.00    2.00
  -2   5   8    5.30    3.40
   2   5  -8    1.10    1.60
  -2  -5   8    1.80    0.60
   2  -5  -8    0.90    1.20
   2  -5  -8    1.30    1.30
  -2  -5   8    2.10    0.60
  -2   5   7   10.70    3.20
   2   5  -7   10.10    1.70
  -2   5   7    9.80    2.10
   2  -5  -7   11.30    1.40
   2  -5  -7    7.80    1.30
   2   5  -6   10.50    1.50
  -2   5   6   12.70    3.20
  -2   5   6   10.40    1.80
   2  -5  -6    9.50    1.10
   2  -5  -6    9.60    1.10
   2   5  -5    1.00    1.00
   2   5  -5    0.30    0.90
  -2   5   5    1.00    2.20
  -2   5   5   -2.00    1.30
   2  -5  -5    0.20    0.60
   2  -5  -5    0.00    0.60
   2   5  -4    2.60    0.90
  -2   5   4    2.10    2.10
  -2   5   4    5.70    1.20
  -2   5   4    2.20    1.20
   2   5  -4    2.50    0.90
   2  -5  -4    3.80    0.40
   2  -5  -4    2.50    0.30
  -2   5   3    2.60    2.00
   2   5  -3    2.90    0.60
  -2   5   3    1.00    0.90
   2   5  -3    2.20    0.70
  -2   5   3    3.90    1.00
  -2   5   2   18.50    1.60
   2   5  -2   20.40    1.20
  -2   5   2   19.20    2.60
   2   5  -2   20.10    1.30
  -2   5   2   20.60    1.70
  -2   5   1    3.40    0.50
  -2   5   1    4.30    1.60
   2   5  -1    3.80    0.50
  -2   5   1    3.90    0.70
   2   5  -1    3.40    0.40
   2   5   0   62.19    3.20
   2   5   0   62.79    3.20
  -2   5   0   62.19    3.10
   2   5   1   70.29    4.60
   2   5   1   70.19    3.70
   2   5   1   69.89    3.60
  -2   5  -2    2.50    0.40
   2   5   2    1.30    0.90
   2   5   2    3.70    1.90
  -2   5  -2    1.90    0.60
  -2   5  -3   74.79    3.80
   2   5   3   79.69    4.30
   2   5   3   69.39    5.10
  -2   5  -3   74.09    4.00
   2   5   3   72.59    4.10
   2   5   4    0.30    1.20
   2   5   4    1.80    2.30
  -2   5  -4    0.10    0.90
  -2   5  -4    0.30    0.70
  -2  -5  -4   -0.20    0.60
  -2  -5  -4    0.00    0.50
   2   5   5   28.90    3.60
  -2   5  -5   28.60    2.40
  -2   5  -5   31.20    2.30
   2   5   5   25.40    2.30
  -2  -5  -5   26.00    1.90
  -2  -5  -5   26.40    2.10
  -2   5  -6   10.40    1.60
   2   5   6    9.20    1.90
   2   5   6   12.40    3.00
  -2  -5  -6   10.10    1.20
  -2  -5  -6    9.90    1.40
  -2   5  -7    7.80    1.70
   2   5   7    2.00    2.00
   2   5   7    9.70    3.50
  -2  -5  -7    6.50    1.30
  -2  -5  -7    7.40    1.50
   2   5   8   18.30    4.00
  -2   5  -8   16.20    2.20
   2   5   8   13.00    2.50
   2  -5   8   16.60    1.50
  -2  -5  -8   12.60    1.70
   2   5   9   34.80    3.40
  -2   5  -9   31.70    3.00
   2   5   9   33.60    5.00
  -2  -5  -9   32.40    3.10
   2  -5   9   33.10    2.30
   2   5  10    3.30    3.70
  -2   5 -10    2.60    2.10
   2   5  10    3.20    2.50
   2  -5  10    3.20    1.00
  -2  -5 -10    2.20    1.60
   2   5  11    6.60    2.70
  -2   5 -11    6.50    2.40
  -2  -5 -11    5.50    1.90
   2   5  12    0.80    2.90
  -2   5 -12    1.30    2.50
  -2  -5 -12    1.50    1.90
  -2   6  12    7.00    3.10
   2   6 -12    2.30    2.50
   2  -6 -12   -1.70    1.60
  -2   6  11   12.10    3.10
   2   6 -11   11.20    2.70
   2  -6 -11    7.40    1.70
   2   6 -10    4.30    2.20
  -2   6  10    7.90    2.70
  -2   6  10    0.10    4.00
   2  -6 -10    1.90    1.30
  -2   6   9   -0.40    3.50
  -2   6   9   -1.80    2.20
   2   6  -9   -1.20    1.80
   2  -6  -9   -0.10    1.10
  -2   6   8   24.60    2.80
  -2   6   8   29.20    4.40
   2   6  -8   32.10    3.20
   2  -6  -8   24.70    2.20
  -2   6   7    1.80    3.10
  -2   6   7    0.50    1.90
   2   6  -7    0.50    1.40
   2  -6  -7    0.00    0.80
  -2   6   6  112.39    6.10
   2   6  -6   98.69    5.60
  -2   6   6   97.09    7.20
   2  -6  -6   96.89    5.10
   2  -6  -6   99.29    5.10
   2   6  -5   70.09    4.10
   2   6  -5   71.59    4.10
  -2   6   5   71.19    4.60
  -2   6   5   71.79    5.80
  -2   6   4    4.30    1.50
  -2   6   4    7.80    2.50
   2   6  -4    7.20    1.00
  -2   6   4    5.30    1.40
   2   6  -4    4.60    1.00
  -2   6   3    1.40    1.00
   2   6  -3    1.10    0.60
   2   6  -3    1.00    0.70
  -2   6   3    0.90    1.00
  -2   6   3    0.40    2.10
   2   6  -2    9.00    0.80
   2   6  -2    8.50    0.80
  -2   6   2    8.90    1.10
  -2   6   2   10.10    2.40
  -2   6   2    7.80    1.00
  -2   6   1   51.69    2.80
   2   6  -1   50.19    2.60
  -2   6   1   48.60    2.70
  -2   6   1   49.10    3.90
   2   6  -1   51.49    2.60
   2   6   0  145.99    7.00
   2   6   0  135.89    8.10
  -2   6   0  139.09    6.90
   2   6   0  141.39    7.00
  -2   6   0  142.39    6.90
  -2   6   0  139.49    7.90
   2   6   1    8.90    1.00
  -2   6  -1   10.10    2.00
   2   6   1    9.00    0.80
   2   6   1   14.50    2.60
  -2   6  -2    0.40    0.40
   2   6   2   -1.60    0.90
  -2   6  -2   -0.80    0.50
   2   6   2   -0.80    2.10
   2   6   3  102.39    5.60
  -2   6  -3   99.29    5.20
  -2   6  -3  104.79    5.30
   2   6   3   96.99    6.50
   2   6   3  106.19    5.50
   2   6   4   10.60    1.60
   2   6   4   16.20    3.20
  -2   6  -4   11.90    1.30
  -2   6  -4    9.30    1.10
  -2   6  -5    8.70    1.40
  -2   6  -5    6.20    1.30
   2   6   5    5.90    1.60
   2   6   5    8.30    3.10
  -2  -6  -5    7.10    0.80
  -2  -6  -5    6.50    0.70
   2   6   6   -3.50    1.60
   2   6   6   -2.40    2.80
  -2   6  -6   -0.60    1.30
  -2  -6  -6   -2.10    0.80
  -2  -6  -6   -0.50    0.70
   2   6   7    1.00    1.90
  -2   6  -7   -0.40    1.50
   2   6   7    2.20    3.10
  -2  -6  -7    1.10    0.90
   2   6   8   38.20    5.20
   2   6   8   31.30    3.10
  -2   6  -8   34.40    3.40
  -2  -6  -8   26.50    2.50
   2   6   9   45.60    4.40
   2   6   9   31.10    4.90
  -2   6  -9   31.90    3.00
  -2  -6  -9   35.00    3.00
   2   6  10    2.60    2.60
  -2   6 -10    0.80    2.10
   2   6  10    0.00    4.00
  -2  -6 -10   -1.70    1.40
   2   6  11    1.50    4.60
  -2   6 -11    1.50    2.30
   2   6  11   10.70    3.00
  -2  -6 -11    1.80    1.70
  -2   7  11   12.80    3.20
  -2   7  10    1.70    2.60
  -2   7  10   -5.80    4.10
  -2   7   9   -2.60    3.80
  -2   7   9    2.70    2.40
  -2   7   8    3.40    2.10
  -2   7   8    0.80    3.30
   2   7  -8    0.30    1.70
   2   7  -7   -1.10    1.40
  -2   7   7    2.80    1.90
  -2   7   7   -0.40    3.00
  -2   7   6    3.40    3.10
   2   7  -6   -2.50    1.30
  -2   7   6    2.00    1.70
   2   7  -5    9.10    1.40
  -2   7   5    6.60    3.10
  -2   7   5    5.30    1.70
  -2   7   4    1.00    1.30
   2   7  -4    1.50    0.90
  -2   7   4   -2.60    2.60
   2   7  -4   -0.40    0.80
  -2   7   3    3.00    1.20
  -2   7   3    3.90    1.20
  -2   7   3    3.10    2.50
   2   7  -3    3.50    0.70
   2   7  -3    3.50    0.80
  -2   7   2   44.70    4.20
  -2   7   2   34.20    2.50
  -2   7   2   33.30    2.50
   2   7  -2   33.10    1.90
   2   7  -2   33.40    2.00
   2   7  -1  350.96   16.90
  -2   7   1  343.57   18.00
  -2   7   1  342.37   17.00
   2   7  -1  359.06   18.20
   2   7  -1  346.67   16.90
  -2   7   1  345.97   17.00
   2   7   0   23.80    3.20
   2   7   0   11.90    1.10
  -2   7   0   18.40    2.80
   2   7   0   13.50    1.20
  -2   7   0   14.50    1.20
  -2   7   0   15.30    1.10
   2   7   1   16.40    1.80
   2   7   1   26.60    3.40
  -2   7  -1   19.60    2.80
   2   7   2   14.70    3.00
   2   7   2   14.30    1.30
   2   7   2   12.10    1.40
  -2   7  -2   13.80    2.50
  -2   7  -2   14.60    1.00
  -2   7  -3   11.30    1.10
  -2   7  -3   12.10    1.20
   2   7   3   12.10    2.90
   2   7   3    9.70    1.40
   2   7   4   19.60    3.80
  -2   7  -4   15.30    1.40
   2   7   4   18.60    1.90
   2   7   5    1.40    2.80
  -2   7  -5    0.00    1.10
   2   7   5    3.20    1.60
   2   7   6    1.90    3.10
  -2   7  -6    3.90    1.40
   2   7   6    5.40    1.80
  -2   7  -7    2.00    1.50
   2   7   7    3.90    3.50
   2   7   7    0.30    1.90
   2   7   8    1.20    3.20
   2   7   8    4.00    2.20
   2   7   9    6.00    4.30
   2   7   9   13.80    2.70
   2   7  10   14.50    5.20
   2   7  10   18.30    3.20
  -2   8  10   12.20    3.00
  -2   8  10    8.90    4.70
  -2   8   9   -3.30    4.20
  -2   8   9    5.80    2.50
  -2   8   8    3.00    2.20
  -2   8   8    1.00    3.70
  -2   8   7    5.20    2.00
  -2   8   7    5.80    3.70
  -2   8   6    3.90    3.40
  -2   8   6    1.10    1.70
  -2   8   5    2.80    1.60
  -2   8   5    3.10    2.90
  -2   8   4   62.79    5.70
  -2   8   4   57.49    4.00
  -2   8   3    2.90    1.30
  -2   8   3    1.60    2.60
  -2   8   2   20.20    3.40
  -2   8   2   19.70    2.20
   2   8  -1    2.10    2.50
  -2   8   1    0.20    2.50
   2   8   0   81.99    5.80
  -2   8   0   61.29    5.20
  -2   8  -1   16.60    2.90
   2   8   1   17.20    3.30
   2   8   1   11.50    1.50
   2   8   2    1.50    1.00
   2   8   2   -0.60    2.70
  -2   8  -2    0.80    2.20
   2   8   3    1.30    2.90
   2   8   3   -0.10    1.10
   2   8   4   16.10    1.90
   2   8   4   20.40    4.00
   2   8   5    4.60    3.30
   2   8   5    4.30    1.60
   2   8   6    6.70    3.60
   2   8   6    0.60    1.70
   2   8   7    2.50    2.00
   2   8   7    5.50    3.50
   2   8   8   -1.70    2.10
   2   8   8    0.40    3.90
   2   8   9   -1.70    2.50
   2   8   9   -0.80    4.30
  -2   9   8    0.30    4.40
  -2   9   7    6.70    4.20
  -2   9   6    2.10    3.80
  -2   9   5    2.90    3.40
  -2   9   4    6.30    3.40
  -2   9   3   10.50    3.50
  -2   9   2   70.29    5.90
   2   9  -2   60.79    5.60
   2   9  -1   -1.20    2.60
  -2   9   1   -0.80    2.60
   2   9   0    9.50    3.10
  -2   9   0    3.30    2.80
  -2   9  -1   17.50    3.10
   2   9   1   22.90    3.80
  -2   9  -2    0.80    2.30
   2   9   2    4.50    3.10
   2   9   3    0.50    3.20
  -2   9  -3    3.10    2.40
  -2   9  -4    4.50    2.50
   2   9   4    5.40    3.30
   2   9   5   10.00    3.70
   2   9   6    7.10    4.00
   2   9   7    4.90    4.30
  -2  10   5    6.80    3.80
  -2  10   4    8.90    3.80
   2  10  -4    3.10    3.00
  -2  10   3   25.40    4.40
   2  10  -3   23.20    4.20
   2  10  -2    6.90    3.20
  -2  10   2    3.90    3.40
   2  10  -1    0.00    3.10
  -2  10   1   -1.40    3.10
   2  10   0    3.50    3.10
  -2  10   0    4.60    3.00
  -2  10  -1    1.60    2.70
   2  10   1    2.90    3.30
  -2  10  -2    6.30    2.90
   2  10   2    9.40    3.70
   2  10   3    7.80    3.80
  -2  10  -3    7.50    3.00
   2  10   4    6.50    3.60
  -2  10  -4    3.20    2.80
   3   0 -14    6.30    2.90
  -3   0  14    9.10    2.70
   3   0 -13    5.90    2.70
  -3   0  13    2.70    2.40
  -3   0  12  213.18   11.90
   3   0 -12  221.08   12.00
  -3   0  11    0.50    2.10
   3   0 -11   -0.60    2.30
  -3   0  10   -1.20    2.00
   3   0 -10   -1.00    2.00
   3   0  -9    0.00    1.80
  -3   0   9   -0.10    1.90
   3   0  -8    1.40    1.50
  -3   0   8    4.60    1.70
   3   0  -7    1.00    1.40
  -3   0   7   -0.60    1.40
  -3   0   7    1.90    1.30
   3   0  -6   47.80    3.10
  -3   0   6   42.20    3.10
  -3   0   6   42.90    3.20
   3   0  -6   46.10    3.20
  -3   0   5    0.40    1.10
   3   0  -5   -0.30    1.20
  -3   0   5   -0.40    1.30
   3   0  -5   -0.90    1.00
  -3   0   4  193.58   10.20
   3   0  -4  203.28   10.30
   3   0  -4  221.78   10.20
  -3   0   4  196.88   10.20
  -3   0   3    0.10    0.80
   3   0  -3    0.50    0.80
  -3   0   3    0.20    0.80
   3   0  -3    1.30    0.90
  -3   0   2 2960.60  132.49
   3   0  -2 2520.75  132.19
   3   0  -2 2727.33  132.59
   3   0  -1    0.10    0.60
   3   0  -1    0.60    0.50
  -3   0   1   -0.90    0.60
  -3   0   1    0.10    0.60
   3   0   0  646.04   32.20
  -3   0   0  660.53   32.20
   3   0   0  685.73   32.20
  -3   0  -1   -0.20    0.50
   3   0   1   -0.80    0.70
  -3   0  -1   -0.90    0.60
   3   0   1    0.40    0.60
   3   0   1    0.20    0.50
  -3   0  -1   -0.40    0.60
   3   0   2  153.68    8.00
  -3   0  -2  158.48    7.90
   3   0   2  160.28    7.80
   3   0   2  166.18    7.90
  -3   0  -2  148.49    7.80
   3   0   3    0.60    0.80
   3   0   3   -1.20    0.80
  -3   0  -3   -0.60    1.10
  -3   0  -3   -0.10    0.80
   3   0   3    1.40    1.20
  -3   0  -3    0.40    0.70
  -3   0  -4 2564.44  117.29
   3   0   4 2445.86  117.09
  -3   0  -4 2245.68  117.09
  -3   0  -5   -1.30    1.10
   3   0   5   -0.90    1.20
  -3   0  -5   -1.50    1.20
   3   0   5   -1.10    1.10
  -3   0  -5    0.00    1.60
   3   0   6    2.50    1.30
  -3   0  -6    2.90    1.30
  -3   0  -6    4.90    1.80
   3   0   6    5.20    1.30
   3   0   7   -0.30    1.40
  -3   0  -7    1.70    2.40
  -3   0  -7   -0.30    1.30
   3   0   8   30.70    3.20
  -3   0  -8   36.30    3.30
   3   0   9   -2.10    1.70
  -3   0  -9   -0.40    1.90
   3   0  10    1.40    1.80
  -3   0 -10   -3.60    2.00
   3   0  11   -0.10    1.90
   3   0  12    1.20    2.10
   3   0  13   -1.40    2.10
  -3   0 -13   -2.10    2.10
  -3   1  14    7.00    2.80
   3   1 -14    1.30    2.90
   3  -1 -14   -2.00    2.50
  -3  -1  14    2.10    2.30
  -3   1  13    4.00    2.60
   3   1 -13    2.00    2.80
   3  -1 -13    4.00    2.50
  -3  -1  13    2.80    2.10
   3   1 -12   21.50    3.20
  -3   1  12   22.00    3.10
  -3  -1  12   18.00    2.60
   3  -1 -12   19.30    2.90
  -3   1  11  102.49    6.60
   3   1 -11   93.89    6.60
  -3  -1  11  101.29    6.40
   3  -1 -11  100.29    6.50
  -3   1  10    7.50    2.40
   3   1 -10    8.40    2.40
  -3  -1  10    9.90    2.30
   3  -1 -10    7.00    2.30
  -3   1   9   20.30    2.50
   3   1  -9   19.30    2.50
  -3  -1   9   19.50    2.40
   3  -1  -9   17.40    2.40
   3   1  -8  108.09    6.20
  -3   1   8  111.09    6.30
   3  -1  -8  101.89    6.20
  -3  -1   8  103.39    6.10
  -3   1   7   33.30    3.20
   3   1  -7   37.80    3.20
  -3  -1   7   40.10    3.10
  -3  -1   7   38.00    2.90
   3  -1  -7   38.50    3.20
   3   1  -6    0.60    1.10
  -3   1   6    1.20    1.20
  -3   1   6    0.70    1.50
   3   1  -6    0.60    1.40
   3  -1  -6    2.00    1.40
   3  -1  -6    3.60    2.10
   3  -1  -6    2.10    1.20
  -3  -1   6    0.90    1.30
  -3  -1   6    3.80    1.10
   3   1  -5  193.28    9.10
   3   1  -5  177.68    9.10
  -3   1   5  168.08    9.10
  -3  -1   5  192.38    9.10
   3  -1  -5  166.38    9.10
   3  -1  -5  171.48    9.50
  -3  -1   5  180.78    9.10
   3   1  -4  151.28    7.20
   3   1  -4  139.09    7.20
  -3   1   4  141.99    7.20
  -3  -1   4  143.09    7.10
   3  -1  -4  135.89    7.50
   3  -1  -4  149.49    7.20
   3  -1  -4  128.89    7.20
  -3  -1   4  128.59    7.20
   3   1  -3  225.68   11.50
  -3   1   3  217.38   11.50
   3  -1  -3  232.78   11.50
   3  -1  -3  251.47   11.50
   3  -1  -3  241.98   11.80
  -3  -1   3  229.78   11.40
  -3  -1   3  227.98   11.50
  -3   1   2  156.78    7.90
   3   1  -2  156.08    7.80
   3   1  -2  163.88    7.90
   3  -1  -2  152.18    7.80
  -3  -1   2  161.88    7.90
   3  -1  -2  151.28    8.10
   3  -1  -2  157.38    7.90
  -3  -1   2  165.48    7.80
  -3   1   1 4741.03  238.38
   3   1  -1 4275.27  238.38
   3   1  -1 5569.64  238.58
  -3   1   1 4944.51  238.38
  -3  -1   1 4918.51  238.38
  -3  -1   1 5164.98  238.48
   3  -1  -1 4905.01  238.38
   3  -1  -1 4837.12  238.68
   3  -1  -1 4983.80  238.48
   3   1   0 1895.91   91.89
  -3   1   0 1890.71   92.09
   3   1   0 1802.22   91.89
  -3   1   0 2044.80   91.99
   3  -1   0 1958.70   92.09
  -3  -1   0 1776.52   91.89
   3  -1   0 1825.92   91.89
  -3  -1   0 1972.90   92.09
   3   1   1  289.57   13.60
  -3   1  -1  277.97   13.50
   3   1   1  279.77   13.80
   3   1   1  286.17   13.60
  -3   1  -1  264.57   13.60
  -3   1  -1  283.57   13.60
   3  -1   1  262.87   13.60
  -3  -1  -1  263.27   13.60
  -3  -1  -1  295.07   13.60
   3  -1   1  283.97   13.60
   3   1   2  149.88    7.90
  -3   1  -2  151.18    7.70
  -3   1  -2  153.38    7.80
  -3   1  -2  160.58    7.70
   3   1   2  147.99    7.70
   3   1   2  162.38    7.80
  -3  -1  -2  153.28    7.80
   3  -1   2  154.08    7.70
  -3  -1  -2  156.88    7.90
  -3  -1  -2  157.18    7.70
   3  -1   2  157.38    7.70
   3   1   3  234.98   12.00
  -3   1  -3  224.68   11.70
   3   1   3  250.17   11.80
   3   1   3  238.88   11.70
  -3   1  -3  218.38   11.70
  -3   1  -3  231.38   11.80
  -3  -1  -3  244.68   11.80
  -3  -1  -3  241.88   11.70
  -3  -1  -3  235.98   11.90
   3  -1   3  244.68   11.70
   3  -1   3  231.18   11.70
  -3   1  -4  163.98    8.60
  -3   1  -4  165.88    8.40
   3   1   4  161.08    8.80
   3   1   4  160.78    8.40
  -3   1  -4  166.78    8.40
   3   1   4  174.58    8.50
   3  -1   4  145.99    8.30
  -3  -1  -4  175.08    8.50
  -3  -1  -4  167.08    8.70
  -3  -1  -4  162.58    8.40
   3  -1   4  171.18    8.40
  -3   1  -5  313.77   15.70
   3   1   5  320.07   16.20
   3   1   5  296.97   15.80
   3   1   5  300.57   15.70
  -3   1  -5  308.27   15.70
  -3   1  -5  321.37   16.00
   3  -1   5  324.27   15.70
  -3  -1  -5  327.27   16.10
  -3  -1  -5  328.57   15.80
  -3  -1  -5  323.37   15.70
  -3   1  -6    8.80    1.50
   3   1   6    8.30    1.50
   3   1   6   17.10    2.70
  -3   1  -6   14.30    2.20
   3  -1   6   14.70    1.60
  -3  -1  -6   16.20    2.20
   3  -1   6   10.60    1.40
  -3   1  -7    1.10    2.00
   3   1   7    0.50    1.50
  -3   1  -7    1.60    1.40
   3  -1   7    0.90    1.20
  -3   1  -8    2.10    1.70
   3   1   8    1.70    1.70
   3  -1   8    0.30    1.40
  -3   1  -9    6.70    2.10
   3   1   9    6.70    2.00
   3  -1   9    5.90    1.70
  -3   1 -10    2.20    2.10
   3   1  10    3.70    2.10
   3  -1  10    1.10    1.70
   3   1  11    8.10    2.30
  -3   1 -11    5.60    2.40
  -3  -1 -11    5.10    2.10
   3  -1  11    6.30    2.00
   3   1  12    0.70    2.20
   3  -1  12    3.80    2.00
  -3  -1 -12   -1.30    1.90
   3   1  13    0.10    2.40
  -3  -1 -13   -1.10    2.10
   3  -1  13    0.80    2.10
  -3   2  14    3.90    2.90
   3   2 -14    3.90    3.10
  -3  -2  14    4.00    2.10
   3  -2 -14   -3.70    2.60
  -3   2  13    1.60    2.80
   3   2 -13    1.00    2.70
  -3  -2  13    1.50    2.00
   3  -2 -13   -0.20    2.40
   3   2 -12   -1.70    2.50
  -3   2  12    4.70    2.70
  -3  -2  12    2.50    1.90
   3  -2 -12    1.50    2.20
   3   2 -11   61.39    5.10
  -3   2  11   68.69    5.40
   3  -2 -11   56.59    4.90
  -3  -2  11   60.19    4.60
   3   2 -10   63.79    4.90
  -3   2  10   58.09    5.00
   3  -2 -10   59.49    4.80
  -3  -2  10   66.79    4.70
   3   2  -9   27.40    2.80
  -3   2   9   25.00    2.90
  -3  -2   9   25.20    2.50
   3  -2  -9   26.20    2.80
  -3   2   8   76.89    5.20
   3   2  -8   87.59    5.40
  -3  -2   8   90.29    5.00
   3  -2  -8   81.99    5.30
  -3  -2   8   90.49    5.20
   3   2  -7   37.20    3.10
  -3   2   7   33.90    3.30
  -3  -2   7   32.40    3.00
  -3  -2   7   40.70    2.80
   3  -2  -7   40.60    3.40
   3  -2  -7   37.80    3.10
  -3   2   6    9.80    1.50
   3   2  -6   12.50    1.60
  -3   2   6   10.30    1.70
   3   2  -6   15.70    1.50
  -3  -2   6   12.60    1.50
   3  -2  -6    8.70    1.60
   3  -2  -6   13.40    1.50
   3  -2  -6   16.00    2.30
  -3  -2   6   11.20    1.30
  -3   2   5   22.10    2.20
  -3   2   5   19.50    1.90
   3   2  -5   23.90    2.20
   3  -2  -5   21.30    2.10
   3  -2  -5   25.80    2.40
   3  -2  -5   26.60    2.60
  -3  -2   5   24.80    2.20
  -3  -2   5   23.30    1.90
   3   2  -4  223.48   10.50
  -3   2   4  200.58   10.60
  -3   2   4  174.98   10.60
   3   2  -4  208.38   10.50
  -3   2   4  206.68   11.00
  -3  -2   4  222.68   10.40
   3  -2  -4  208.68   10.90
   3  -2  -4  213.68   10.60
  -3  -2   4  221.98   10.50
   3  -2  -4  223.58   10.50
  -3   2   3  194.98    9.90
   3   2  -3  206.98    9.40
  -3   2   3  158.68    9.40
   3   2  -3  195.08    9.40
  -3   2   3  199.18    9.50
   3  -2  -3  174.88    9.50
  -3  -2   3  199.68    9.30
   3  -2  -3  195.78    9.80
  -3  -2   3  176.88    9.40
   3  -2  -3  194.38    9.40
   3   2  -2  805.92   37.30
   3   2  -2  789.02   37.30
  -3   2   2  762.52   37.60
  -3   2   2  735.93   37.30
  -3   2   2  749.62   37.30
   3  -2  -2  790.72   37.30
  -3  -2   2  759.72   37.30
   3  -2  -2  789.42   37.30
   3  -2  -2  761.72   37.50
  -3  -2   2  748.33   37.20
   3   2  -1  114.89    5.80
  -3   2   1  105.09    5.80
  -3   2   1  117.89    6.00
   3   2  -1  128.69    5.90
  -3   2   1  126.29    5.90
   3  -2  -1  118.69    5.80
   3  -2  -1  118.79    6.00
  -3  -2   1  125.89    5.90
  -3  -2   1  110.89    5.80
   3  -2  -1  112.79    5.90
  -3   2   0   88.59    4.40
   3   2   0   92.79    4.40
   3   2   0   82.39    4.40
  -3   2   0   85.79    4.30
  -3   2   0   86.99    4.40
  -3  -2   0   81.49    4.30
   3  -2   0   82.49    4.30
  -3  -2   0   91.59    4.40
   3  -2   0   88.69    4.30
  -3   2  -1  168.88    7.70
   3   2   1  163.48    7.80
   3   2   1  155.18    8.10
   3   2   1  167.28    7.80
  -3   2  -1  164.78    7.80
  -3  -2  -1  135.99    7.80
   3  -2   1  148.09    7.70
  -3  -2  -1  152.98    7.70
   3  -2   1  159.68    7.70
   3   2   2  433.46   20.20
   3   2   2  398.56   20.20
  -3   2  -2  458.85   20.10
   3   2   2  411.76   20.50
   3  -2   2  410.16   20.10
   3  -2   2  379.76   20.10
  -3  -2  -2  382.56   20.10
  -3  -2  -2  414.16   20.40
  -3  -2  -2  428.26   20.20
  -3   2  -3   39.50    2.10
  -3   2  -3   32.70    2.30
   3   2   3   33.30    2.30
   3   2   3   33.80    2.50
   3   2   3   31.50    2.90
   3  -2   3   34.10    2.20
  -3  -2  -3   33.10    2.70
  -3  -2  -3   34.60    2.30
   3  -2   3   35.10    2.10
  -3  -2  -3   32.30    2.20
   3   2   4  335.07   17.00
   3   2   4  339.47   17.40
  -3   2  -4  370.56   16.90
   3   2   4  354.56   17.00
  -3   2  -4  348.37   17.00
  -3  -2  -4  364.86   17.00
  -3  -2  -4  317.67   16.90
   3  -2   4  344.77   16.90
  -3  -2  -4  338.17   17.30
   3  -2   4  323.37   16.80
  -3   2  -5   14.40    1.40
  -3   2  -5   10.90    1.40
   3   2   5   10.50    1.60
   3   2   5   12.00    1.50
   3   2   5   13.30    2.30
   3  -2   5   12.30    1.20
  -3  -2  -5   13.90    1.50
  -3  -2  -5   13.10    1.40
  -3  -2  -5   14.40    2.20
   3  -2   5   13.00    1.40
  -3   2  -6    7.60    1.50
   3   2   6    8.40    1.60
   3   2   6   12.30    2.50
  -3  -2  -6    9.60    1.40
  -3  -2  -6   13.10    1.90
   3  -2   6   11.70    1.30
   3  -2   6   13.00    1.50
  -3   2  -7   13.90    1.90
   3   2   7   16.50    3.30
  -3   2  -7   15.60    2.70
   3   2   7   12.50    1.90
   3  -2   7   13.90    1.60
  -3  -2  -7   13.40    1.70
   3  -2   7   17.00    1.80
  -3   2  -8   49.90    4.10
   3   2   8   59.49    4.50
   3  -2   8   59.09    3.90
  -3  -2  -8   55.79    4.00
   3   2   9    0.20    1.90
  -3   2  -9   -3.10    1.80
  -3  -2  -9   -0.30    1.60
   3  -2   9   -0.90    1.50
  -3   2 -10   14.40    2.40
   3   2  10   10.60    2.40
  -3  -2 -10   12.70    2.10
   3  -2  10   12.50    2.00
  -3   2 -11   12.50    2.50
   3   2  11   12.30    2.60
   3  -2  11   16.70    2.30
  -3  -2 -11   14.40    2.40
  -3   2 -12    2.30    2.40
   3   2  12    2.30    2.40
   3  -2  12    2.40    1.90
  -3  -2 -12    2.50    2.00
   3   2  13   -0.70    2.50
   3  -2  13    0.50    2.00
  -3  -2 -13   -3.80    2.20
   3   3 -14   10.40    3.20
  -3   3  14    9.20    3.10
  -3  -3  14    6.30    2.10
   3  -3 -14    6.50    2.80
  -3   3  13    2.70    2.90
   3   3 -13   -0.40    2.70
  -3  -3  13    2.40    1.90
   3  -3 -13    2.50    2.40
  -3   3  12   -0.60    2.60
   3   3 -12    1.10    2.50
  -3  -3  12    2.00    1.70
   3  -3 -12   -1.00    2.20
  -3   3  11    1.10    2.40
   3   3 -11    1.70    2.20
   3  -3 -11   -3.30    1.90
  -3  -3  11    0.60    1.60
  -3   3  10   22.60    2.90
   3   3 -10   18.30    2.60
   3  -3 -10   15.70    2.40
  -3  -3  10   17.90    2.10
  -3   3   9    1.50    2.20
   3   3  -9    0.90    2.00
   3  -3  -9    4.00    1.80
  -3  -3   9    5.70    1.50
  -3  -3   9    4.20    1.60
   3   3  -8    0.60    1.80
  -3   3   8   -3.90    1.90
   3  -3  -8    5.50    1.70
  -3  -3   8    0.60    1.40
  -3  -3   8    1.00    1.20
   3   3  -7   -2.30    1.40
  -3   3   7    0.90    1.60
  -3  -3   7   -1.40    1.10
  -3  -3   7    0.50    0.90
   3  -3  -7   -0.10    1.30
   3  -3  -7    0.10    1.20
   3   3  -6    1.90    1.20
  -3   3   6    3.00    1.50
  -3   3   6   -0.80    2.10
   3   3  -6    0.90    1.10
   3  -3  -6    0.50    1.00
   3  -3  -6    2.30    1.20
  -3  -3   6    1.80    1.00
  -3  -3   6    2.60    0.80
   3   3  -5   29.30    2.30
  -3   3   5   30.60    3.50
   3   3  -5   30.10    2.30
  -3   3   5   26.80    2.50
  -3   3   5   29.20    2.40
   3  -3  -5   27.20    2.90
   3  -3  -5   26.10    2.10
  -3  -3   5   29.70    2.10
  -3  -3   5   28.60    1.90
   3  -3  -5   26.80    2.30
  -3   3   4  642.44   31.80
  -3   3   4  661.23   31.80
   3   3  -4  639.24   31.70
  -3   3   4  667.43   32.30
   3   3  -4  664.43   31.70
  -3  -3   4  658.03   31.60
   3  -3  -4  638.14   32.10
   3  -3  -4  637.84   31.70
   3  -3  -4  674.93   31.70
  -3  -3   4  625.54   31.60
  -3   3   3 1043.40   56.09
   3   3  -3 1185.58   55.99
   3   3  -3 1220.58   56.09
  -3   3   3 1183.58   56.09
  -3   3   3 1183.78   56.49
  -3  -3   3 1192.88   55.99
   3  -3  -3 1105.89   55.99
   3  -3  -3 1170.48   56.39
  -3  -3   3 1167.68   55.89
   3  -3  -3 1113.79   55.99
   3   3  -2    3.90    0.70
  -3   3   2    1.10    0.70
  -3   3   2    3.30    1.50
   3   3  -2    3.20    0.50
  -3   3   2    2.80    0.70
   3  -3  -2    3.20    1.10
   3  -3  -2    3.20    0.40
   3  -3  -2    3.10    0.60
  -3   3   1   65.09    3.20
   3   3  -1   64.09    3.20
   3   3  -1   62.69    3.20
  -3   3   1   60.09    3.60
  -3   3   1   60.59    3.30
  -3   3   0    8.90    0.70
   3   3   0    9.40    0.80
   3   3   0    6.10    0.70
  -3   3   0    8.30    1.10
  -3   3   0    7.00    0.60
  -3  -3   0    7.00    0.70
   3   3   1  274.57   13.20
   3   3   1  257.77   13.10
   3   3   1  259.57   13.60
  -3   3  -1  264.77   13.10
  -3   3  -1  276.17   13.00
  -3  -3  -1  268.97   13.00
  -3  -3  -1  270.57   13.10
   3   3   2  217.88   10.70
   3   3   2  206.68   11.20
  -3   3  -2  228.08   10.60
   3   3   2  228.68   10.80
  -3   3  -2  220.28   10.60
  -3  -3  -2  204.08   10.60
  -3  -3  -2  216.98   10.70
   3  -3   2  205.78   10.50
   3   3   3   14.20    1.30
  -3   3  -3   11.80    1.20
  -3   3  -3   11.30    1.20
   3   3   3   12.40    1.40
   3   3   3   15.60    2.10
  -3  -3  -3   12.80    1.30
   3  -3   3   12.10    1.10
  -3  -3  -3   17.50    2.00
  -3  -3  -3   14.90    1.30
   3  -3   3   12.50    1.30
  -3   3  -4   56.39    3.30
   3   3   4   55.59    3.40
   3   3   4   52.89    4.10
   3   3   4   55.39    3.50
  -3   3  -4   55.29    3.20
  -3  -3  -4   57.79    3.20
  -3  -3  -4   54.99    3.90
  -3  -3  -4   57.19    3.40
   3  -3   4   58.79    3.00
   3  -3   4   54.69    3.20
  -3   3  -5   32.00    2.60
   3   3   5   33.50    2.80
   3   3   5   29.70    3.50
  -3   3  -5   34.70    2.30
  -3  -3  -5   32.70    2.30
   3  -3   5   32.90    2.30
  -3  -3  -5   33.90    2.60
   3  -3   5   31.20    2.20
   3   3   6    6.00    2.50
  -3   3  -6    5.90    1.40
   3   3   6    4.90    1.60
  -3  -3  -6    3.50    1.20
   3  -3   6    4.90    1.00
   3  -3   6    4.10    1.10
  -3  -3  -6    4.20    1.30
   3   3   7  384.76   21.20
   3   3   7  398.06   21.80
  -3   3  -7  419.06   21.10
   3  -3   7  445.66   21.00
   3  -3   7  457.75   20.90
  -3  -3  -7  428.16   21.00
  -3   3  -8    2.10    1.80
   3   3   8   -1.80    3.20
   3   3   8    3.00    2.10
   3  -3   8    1.70    1.40
  -3  -3  -8    4.10    1.60
   3  -3   8    4.30    1.30
   3   3   9    0.90    2.00
  -3   3  -9    0.70    1.80
   3   3   9   -3.40    3.00
  -3  -3  -9    0.50    1.50
   3  -3   9    0.50    1.30
  -3   3 -10   16.90    2.50
   3   3  10   14.30    2.50
  -3  -3 -10   13.60    2.10
   3  -3  10   18.70    2.00
  -3   3 -11    0.70    2.20
   3   3  11    0.90    2.30
   3  -3  11    1.00    1.60
  -3  -3 -11    3.50    1.80
  -3   3 -12    0.10    2.40
   3   3  12    2.80    2.60
   3  -3  12    0.20    1.70
  -3  -3 -12   -1.20    2.00
   3   3  13   -0.60    2.60
   3  -3  13    1.70    1.90
  -3  -3 -13   -1.70    2.10
   3   4 -13   -3.70    2.70
  -3   4  13   -5.50    2.80
   3  -4 -13   -1.70    2.20
  -3  -4  13    0.70    1.60
   3   4 -12    6.50    2.70
  -3   4  12    6.60    2.80
   3  -4 -12    5.90    2.20
  -3  -4  12    9.70    1.80
   3   4 -11    9.30    2.50
  -3   4  11    9.30    2.80
   3  -4 -11    2.70    2.00
  -3  -4  11    8.00    1.50
   3   4 -10    2.10    2.20
  -3   4  10    3.00    2.40
  -3  -4  10    4.10    1.30
   3  -4 -10    2.80    1.80
   3   4  -9    2.20    2.00
  -3   4   9    0.40    2.40
   3  -4  -9    3.10    1.70
  -3  -4   9    3.20    1.20
  -3  -4   9    4.30    1.10
  -3   4   8   10.80    3.50
  -3   4   8    5.40    2.20
   3   4  -8    7.80    2.00
  -3  -4   8    8.10    1.20
   3  -4  -8    7.90    1.70
  -3  -4   8    5.80    1.20
  -3   4   7   -0.90    2.80
  -3   4   7   -2.80    1.70
   3   4  -7   -1.50    1.40
   3  -4  -7    0.60    1.20
  -3  -4   7   -2.70    0.80
  -3  -4   7   -0.60    0.70
   3  -4  -7   -2.40    1.10
   3   4  -6   29.00    2.40
  -3   4   6   15.60    2.10
   3   4  -6   22.40    2.30
  -3   4   6   25.20    3.30
   3  -4  -6   21.60    2.20
   3  -4  -6   21.70    2.10
  -3  -4   6   24.00    1.60
  -3  -4   6   25.60    1.70
  -3   4   5   59.79    4.80
  -3   4   5   61.49    4.00
   3   4  -5   66.79    3.80
   3   4  -5   67.49    3.80
  -3   4   5   64.99    3.90
  -3  -4   5   66.99    3.20
   3  -4  -5   65.49    3.60
   3  -4  -5   60.59    3.70
  -3  -4   5   63.79    3.30
  -3   4   4   -1.20    1.90
   3   4  -4    0.20    0.80
  -3   4   4   -1.30    1.00
   3   4  -4   -1.00    0.80
  -3   4   4   -2.40    0.90
   3  -4  -4   -0.20    0.70
   3  -4  -4   -1.30    0.60
   3  -4  -4   -0.10    1.40
   3   4  -3    5.30    0.80
  -3   4   3    3.50    1.00
  -3   4   3    4.40    1.90
   3   4  -3    4.90    0.70
  -3   4   3    4.40    1.00
   3  -4  -3    6.00    1.50
   3  -4  -3    4.80    0.50
   3   4  -2  118.19    5.90
  -3   4   2  116.99    6.60
   3   4  -2  119.49    6.00
  -3   4   2  118.19    6.00
  -3   4   2  122.79    6.10
   3  -4  -2  119.49    6.40
   3   4  -1   17.80    1.20
  -3   4   1   17.70    2.10
   3   4  -1   20.20    1.30
  -3   4   1   19.30    1.40
  -3   4   1   18.50    1.20
  -3   4   0   61.19    3.80
  -3   4   0   63.89    3.30
   3   4   0   62.39    3.30
  -3   4   0   63.89    3.20
   3   4   0   66.49    3.30
   3   4   1  228.38   11.60
  -3   4  -1  238.28   11.50
   3   4   1  234.08   12.20
   3   4   1  245.18   11.70
  -3   4  -1  236.38   11.50
   3   4   2  131.59    6.90
   3   4   2  132.39    7.50
  -3   4  -2  136.49    6.80
   3   4   2  145.79    7.00
  -3   4  -2  135.79    6.80
  -3  -4  -2  135.59    6.70
  -3  -4  -2  136.59    6.80
  -3   4  -3   13.20    1.20
   3   4   3   14.20    1.30
   3   4   3   16.30    2.30
  -3   4  -3   14.80    1.50
   3   4   3   12.40    1.40
  -3  -4  -3   14.50    1.20
  -3  -4  -3   14.10    1.20
  -3   4  -4   -0.50    0.90
   3   4   4   -0.30    1.10
  -3   4  -4    0.80    0.70
   3   4   4    0.30    1.10
   3   4   4    2.00    1.90
  -3  -4  -4   -0.40    0.60
  -3  -4  -4    1.30    0.90
   3  -4   4    0.20    0.30
   3  -4   4   -0.40    0.20
  -3   4  -5    0.00    0.90
  -3   4  -5    0.20    1.10
   3   4   5   -0.30    1.30
   3   4   5    0.40    2.20
  -3  -4  -5    0.30    1.00
   3  -4   5   -0.10    0.50
   3  -4   5   -0.60    0.70
  -3  -4  -5    0.20    0.80
  -3   4  -6    0.30    1.40
   3   4   6   -2.00    1.70
   3   4   6    0.60    2.50
  -3  -4  -6   -0.40    1.10
   3  -4   6   -0.70    0.90
  -3  -4  -6   -1.60    1.30
   3  -4   6   -1.00    0.80
   3   4   7  169.88   10.30
  -3   4  -7  177.18    9.10
   3   4   7  161.58    9.40
   3  -4   7  171.28    8.70
   3  -4   7  165.98    8.60
  -3  -4  -7  169.88    8.90
  -3   4  -8    0.30    1.70
   3   4   8   -1.20    2.10
   3   4   8   -0.60    2.80
   3  -4   8   -1.30    1.20
  -3  -4  -8    0.40    1.40
   3  -4   8    0.80    1.10
   3   4   9    0.60    2.20
   3   4   9   -1.00    3.40
  -3   4  -9   -1.60    1.90
   3  -4   9    0.20    1.10
  -3  -4  -9   -0.50    1.40
   3   4  10    3.50    2.40
  -3   4 -10    1.10    2.10
   3   4  10   -2.30    3.20
  -3  -4 -10   -0.40    1.60
   3  -4  10    0.90    1.30
   3   4  11    4.30    2.60
  -3   4 -11    1.90    2.30
  -3  -4 -11    0.30    1.70
   3  -4  11    0.20    1.30
   3   4  12   -0.20    2.80
  -3   4 -12   -1.30    2.50
   3  -4  12    0.60    1.60
  -3  -4 -12    1.60    2.00
   3   5 -13   -1.70    2.70
  -3   5  13    4.80    3.10
   3  -5 -13    1.40    2.00
  -3   5  12   19.40    3.40
   3   5 -12   15.80    3.10
  -3   5  11   12.70    3.00
   3   5 -11   15.90    2.70
  -3  -5  11   15.40    1.50
   3   5 -10   11.80    2.40
  -3   5  10    9.30    2.60
  -3  -5  10    9.30    1.20
  -3   5   9   38.80    5.20
   3   5  -9   31.80    3.00
  -3   5   9   36.70    3.50
  -3  -5   9   33.20    2.30
  -3   5   8   58.09    4.60
   3   5  -8   63.29    4.30
  -3   5   8   57.59    6.10
   3  -5  -8   50.29    3.70
  -3  -5   8   57.19    3.00
  -3  -5   8   54.19    3.00
  -3   5   7    8.60    2.00
  -3   5   7   13.90    3.50
   3   5  -7   10.30    1.70
   3  -5  -7    9.30    1.30
  -3   5   6   15.70    2.00
   3   5  -6   17.40    1.70
  -3   5   6   18.80    3.40
   3  -5  -6   14.50    1.30
  -3   5   5  130.09    8.00
  -3   5   5  128.79    7.10
   3   5  -5  131.79    6.80
   3   5  -5  130.09    6.80
   3  -5  -5  132.79    6.60
   3  -5  -5  132.69    6.60
   3   5  -4   25.50    1.90
  -3   5   4   24.10    2.20
  -3   5   4   20.00    1.80
  -3   5   4   24.00    3.30
   3   5  -4   26.50    1.90
   3  -5  -4   18.80    1.20
   3  -5  -4   24.10    1.30
  -3   5   3    0.60    0.90
  -3   5   3    3.70    2.00
  -3   5   3    1.20    0.90
   3   5  -3    2.00    0.60
   3   5  -3    2.40    0.70
  -3   5   2   -0.70    1.60
  -3   5   2    1.20    0.70
  -3   5   2    1.30    0.80
   3   5  -2    2.20    0.40
   3   5  -2    1.70    0.60
  -3   5   1   45.40    2.50
   3   5  -1   43.80    2.40
  -3   5   1   44.30    2.40
  -3   5   1   43.60    3.30
   3   5  -1   46.60    2.40
  -3   5   0   81.29    4.10
   3   5   0   79.69    4.20
   3   5   0   82.89    4.10
  -3   5   0   81.09    4.10
  -3   5   0   81.79    4.80
   3   5   1  139.39    7.00
  -3   5  -1  135.39    6.80
   3   5   1  146.19    6.90
  -3   5  -1  134.59    7.40
  -3   5  -1  135.09    6.80
  -3   5  -2   35.60    2.00
   3   5   2   39.80    3.30
   3   5   2   35.00    2.50
   3   5   2   38.90    2.30
   3   5   3  154.28    8.90
   3   5   3  159.58    8.10
  -3   5  -3  156.88    7.80
   3   5   3  151.48    7.90
  -3   5  -3  158.68    7.80
  -3  -5  -3  156.78    7.70
  -3  -5  -3  152.58    7.70
   3   5   4    6.40    1.40
   3   5   4    5.80    2.40
  -3   5  -4    6.70    1.10
  -3   5  -4    6.00    0.90
  -3  -5  -4    6.50    0.80
  -3  -5  -4    5.90    0.90
   3   5   5   13.00    1.80
  -3   5  -5   15.00    1.50
   3   5   5   13.50    3.20
  -3  -5  -5   10.90    1.10
  -3  -5  -5   12.60    1.30
  -3   5  -6   14.50    1.70
   3   5   6   10.20    2.00
   3   5   6   18.50    3.60
  -3  -5  -6   10.50    1.30
  -3  -5  -6   10.90    1.50
  -3   5  -7    1.90    1.50
   3   5   7    1.60    3.00
   3   5   7    3.00    2.00
   3  -5   7    1.40    0.60
   3  -5   7    2.50    0.70
  -3  -5  -7    1.70    1.20
  -3  -5  -7    1.60    1.40
  -3   5  -8   50.29    4.00
   3   5   8   51.39    5.40
   3   5   8   52.69    4.50
   3  -5   8   49.40    3.00
  -3  -5  -8   55.89    3.70
  -3   5  -9    3.10    2.00
   3   5   9    7.10    2.40
   3   5   9    3.30    3.50
   3  -5   9    3.80    0.90
  -3  -5  -9    4.10    1.50
   3   5  10    5.20    2.60
  -3   5 -10    2.00    2.10
   3   5  10    2.00    3.90
   3  -5  10    2.40    1.00
  -3  -5 -10    4.10    1.70
   3   5  11    6.00    2.90
  -3   5 -11    7.20    2.50
  -3  -5 -11    4.80    1.90
   3   5  12    2.10    2.90
  -3   5 -12   -1.40    2.60
  -3  -5 -12    1.20    2.00
   3   6 -12    1.40    2.50
  -3   6  12    5.40    3.00
   3  -6 -12    0.20    1.70
   3   6 -11   -0.30    2.30
  -3   6  11    4.90    2.90
   3  -6 -11   -0.90    1.50
   3   6 -10    1.10    2.10
  -3   6  10    0.70    2.50
   3  -6 -10    1.50    1.30
  -3   6   9    3.50    2.30
  -3   6   9    4.80    3.50
   3   6  -9    2.90    1.90
   3  -6  -9    5.10    1.20
  -3   6   8    0.50    3.50
  -3   6   8    2.80    2.10
   3   6  -8    0.20    1.60
   3  -6  -8   -0.60    0.90
  -3   6   7    7.00    2.00
  -3   6   7   12.60    3.80
   3   6  -7   12.60    1.80
   3  -6  -7    7.80    1.00
  -3   6   6    0.50    2.70
  -3   6   6   -0.50    1.60
   3   6  -6   -2.50    1.20
   3  -6  -6    0.00    0.60
   3  -6  -6   -0.40    0.50
  -3   6   5   19.80    3.40
   3   6  -5   14.40    1.50
  -3   6   5   12.60    1.80
   3   6  -5   13.20    1.50
   3   6  -4    9.80    1.20
  -3   6   4   11.80    1.70
  -3   6   4   13.80    2.90
  -3   6   4   13.30    1.60
   3   6  -4   12.90    1.20
  -3   6   3    9.50    1.30
   3   6  -3   13.30    1.20
  -3   6   3   14.80    2.80
  -3   6   3   10.70    1.30
   3   6  -3   11.90    1.00
  -3   6   2  106.09    5.50
   3   6  -2  109.79    5.30
  -3   6   2  101.99    6.50
   3   6  -2  103.99    5.30
  -3   6   2  103.49    5.50
  -3   6   1   41.00    2.30
  -3   6   1   39.60    3.60
  -3   6   1   40.50    2.40
   3   6  -1   41.20    2.20
   3   6  -1   40.50    2.20
   3   6   0    0.50    0.60
  -3   6   0    1.70    1.80
   3   6   0    0.70    0.50
  -3   6   0    1.50    0.60
  -3   6   0    1.20    0.40
   3   6   0    3.20    2.00
  -3   6  -1    4.10    0.50
   3   6   1    3.70    0.70
  -3   6  -1    4.00    1.80
   3   6   1    3.10    0.80
  -3   6  -1    4.20    0.50
   3   6   1    4.80    2.20
   3   6   2   32.50    3.80
  -3   6  -2   31.30    1.90
  -3   6  -2   32.60    1.90
   3   6   2   35.50    2.40
   3   6   3    3.50    2.40
  -3   6  -3    3.80    0.70
   3   6   3    4.00    1.20
  -3   6  -4    8.20    1.20
   3   6   4    6.80    1.50
   3   6   4   10.10    2.80
  -3   6  -4    9.90    1.10
  -3   6  -5   21.20    1.80
   3   6   5   24.30    3.50
   3   6   5   16.30    2.00
  -3  -6  -5   19.20    1.50
  -3  -6  -5   18.70    1.60
   3   6   6    2.10    3.10
   3   6   6   -1.90    1.60
  -3   6  -6    1.10    1.30
  -3  -6  -6   -1.00    0.70
  -3   6  -7    7.40    1.60
   3   6   7    8.80    2.10
   3   6   7    9.60    3.50
  -3  -6  -7    4.80    1.00
  -3   6  -8   20.40    2.40
   3   6   8   26.20    4.60
   3   6   8   21.20    2.80
  -3  -6  -8   22.40    2.30
   3   6   9    9.30    3.80
  -3   6  -9    8.30    2.20
   3   6   9   11.90    2.70
  -3  -6  -9    8.60    1.50
   3   6  10    8.40    4.70
  -3   6 -10    9.50    2.30
   3   6  10   12.30    2.90
  -3  -6 -10    6.80    1.70
  -3   6 -11    0.00    2.30
   3   6  11    1.10    2.80
   3   6  11   -3.60    4.50
  -3  -6 -11    0.00    1.70
  -3   7  11   13.80    3.20
  -3   7  10   -3.50    4.00
  -3   7  10    0.90    2.70
  -3   7   9    2.50    2.30
   3   7  -9   -0.60    3.00
  -3   7   9   -6.30    3.70
  -3   7   8    2.00    2.10
  -3   7   8    0.20    3.50
   3   7  -8    2.10    1.70
   3   7  -7   30.20    3.10
  -3   7   7   31.10    3.00
  -3   7   7   31.00    4.80
  -3   7   6   36.80    3.60
   3   7  -6   30.70    2.90
  -3   7   6   36.90    5.00
  -3   7   5    2.30    2.80
  -3   7   5    0.60    1.50
   3   7  -5    0.30    1.10
   3   7  -4    1.20    0.90
  -3   7   4    3.90    2.60
   3   7  -4    2.80    0.90
  -3   7   4    3.70    1.40
   3   7  -3    9.10    0.90
   3   7  -3    7.60    0.90
  -3   7   3    8.80    1.30
  -3   7   3    5.00    2.60
  -3   7   3    8.10    1.30
   3   7  -2  179.68    9.00
  -3   7   2  181.08    9.20
  -3   7   2  176.38    9.20
  -3   7   2  189.68   10.40
   3   7  -2  184.38    9.00
  -3   7   1   27.10    2.20
   3   7  -1   31.70    1.90
   3   7  -1   34.00    1.90
  -3   7   1   36.50    3.80
  -3   7   1   29.70    2.10
   3   7   0  204.78    9.90
  -3   7   0  195.28    9.90
  -3   7   0  195.38    9.90
   3   7   0  204.48   11.30
   3   7   0  204.98   10.00
  -3   7   0  203.28   10.90
   3   7   1   42.50    4.20
   3   7   1   37.50    2.40
   3   7   1   36.40    2.30
  -3   7  -1   37.40    3.70
  -3   7  -1   34.20    2.00
  -3   7  -1   36.20    2.00
  -3   7  -2    0.90    1.90
  -3   7  -2    0.90    0.50
   3   7   2    3.20    2.30
   3   7   2    0.30    1.00
  -3   7  -2    0.30    0.50
  -3   7  -3    1.00    0.70
   3   7   3    3.90    2.80
   3   7   3    1.40    1.20
  -3   7  -3    1.50    0.70
   3   7   4    2.40    1.40
   3   7   4   -2.00    2.80
   3   7   5   11.70    1.90
   3   7   5   18.30    3.70
   3   7   6    1.10    1.70
   3   7   6    2.60    3.10
  -3   7  -6   -0.60    1.30
   3   7   7    1.50    1.90
   3   7   7    6.20    3.70
  -3   7  -7    1.90    1.60
   3   7   8   20.10    2.70
   3   7   8   14.10    4.10
   3   7   9   29.40    3.50
   3   7   9   30.60    5.60
   3   7  10   21.40    5.40
   3   7  10   21.00    3.30
  -3   8  10    9.20    2.90
  -3   8  10   -4.50    4.60
  -3   8   9   -2.20    4.40
  -3   8   9    4.70    2.50
  -3   8   8    0.10    2.10
  -3   8   8   -0.50    3.80
  -3   8   7   25.20    2.90
  -3   8   7   40.20    5.40
  -3   8   6    2.40    3.50
  -3   8   6    1.80    1.80
  -3   8   5    3.80    3.30
  -3   8   5    2.70    1.60
  -3   8   4   20.60    3.60
  -3   8   4   21.00    2.10
  -3   8   3   26.30    3.80
  -3   8   3   19.10    1.90
  -3   8   2   29.40    3.90
  -3   8   1   68.59    5.60
   3   8  -1   73.39    5.70
   3   8   0    5.60    2.70
  -3   8   0    5.90    2.40
   3   8   1    1.10    2.60
   3   8   1    0.30    0.90
  -3   8  -1    2.10    2.20
   3   8   2    7.20    1.20
   3   8   2    7.80    3.20
  -3   8  -2   11.70    2.50
   3   8   3   17.20    1.80
  -3   8  -3   25.20    3.40
   3   8   3   24.80    4.10
   3   8   4    1.40    3.10
   3   8   4    0.60    1.30
   3   8   5    4.70    3.10
   3   8   5   -0.30    1.50
   3   8   6    1.40    1.80
   3   8   6    3.30    3.40
   3   8   7    0.30    2.00
   3   8   7    0.60    3.40
   3   8   8    2.20    2.30
   3   8   8    7.00    4.30
   3   8   9   -1.70    2.50
   3   8   9   -0.30    4.40
  -3   9   8    1.30    4.50
  -3   9   7    4.60    4.00
  -3   9   6   14.40    4.40
  -3   9   5   17.30    3.90
  -3   9   4    9.40    3.40
  -3   9   3    4.20    2.90
  -3   9   2   62.59    5.80
   3   9  -2   60.49    5.60
  -3   9   1    0.50    2.70
   3   9  -1    4.10    2.90
  -3   9   0    7.80    2.80
   3   9   0    8.20    3.10
  -3   9  -1    7.20    2.50
   3   9   1    5.50    3.10
   3   9   2    2.00    2.90
  -3   9  -2    6.00    2.50
   3   9   3    9.20    3.60
  -3   9  -3    8.70    2.70
  -3   9  -4    4.60    2.50
   3   9   4    8.30    3.50
   3   9   5    8.20    3.70
   3   9   6    6.70    4.10
   3   9   7    5.70    4.40
  -3  10   5   11.70    4.20
  -3  10   4   17.60    4.30
   3  10  -4   13.80    3.70
  -3  10   3   41.70    5.60
   3  10  -3   36.80    5.10
  -3  10   2    5.60    3.30
   3  10  -2    4.40    3.10
   3  10  -1    1.70    3.10
  -3  10   1   -0.40    3.00
  -3  10   0    1.90    2.90
   3  10   0    1.60    3.10
   3  10   1    3.80    3.40
  -3  10  -1    4.20    2.90
  -3  10  -2   11.60    3.00
   3  10   2    8.80    3.70
   3  10   3    5.40    3.50
  -3  10  -3    5.10    2.70
   3  10   4    2.10    3.40
   4   0 -15    2.10    2.90
  -4   0  15    3.30    2.80
  -4   0  14    7.40    2.70
   4   0 -14    4.80    2.80
   4   0 -13    7.80    2.80
  -4   0  13    2.60    2.40
   4   0 -12  189.78   10.90
  -4   0  12  193.48   10.80
  -4   0  11    0.20    2.20
   4   0 -11   -1.60    2.30
   4   0 -10   19.20    2.60
  -4   0  10   16.30    2.70
  -4   0   9   -1.30    1.80
   4   0  -9   -0.80    1.70
   4   0  -8   29.80    3.00
  -4   0   8   25.80    2.50
   4   0  -7    0.30    1.30
  -4   0   7    0.30    1.40
  -4   0   7   -0.40    1.50
   4   0  -6   18.10    1.90
  -4   0   6   22.50    2.20
  -4   0   6   16.00    1.80
   4   0  -6   20.00    1.80
   4   0  -5   -3.10    1.10
   4   0  -5   -1.70    1.00
  -4   0   5   -2.10    1.10
  -4   0   5   -1.00    1.00
   4   0  -4   26.10    2.40
   4   0  -4   37.70    2.30
  -4   0   4   32.10    2.30
  -4   0   3    1.20    0.80
   4   0  -3    0.70    0.80
  -4   0   3    1.00    0.90
   4   0  -3    0.40    0.70
  -4   0   2 4108.59  204.88
   4   0  -2 4365.56  205.28
  -4   0   1   -0.50    0.60
   4   0  -1    0.30    0.60
   4   0  -1   -0.30    0.60
  -4   0   1   -0.40    0.60
   4   0   0  179.68    8.90
   4   0   0  198.98    8.90
  -4   0   0  178.98    8.90
  -4   0   0  164.68    8.90
   4   0   1   -0.70    0.60
   4   0   1   -0.60    0.50
  -4   0  -1    0.20    0.50
  -4   0  -1   -0.40    0.50
   4   0   1   -1.00    0.60
  -4   0  -2  646.04   30.60
  -4   0  -2  619.14   30.50
   4   0   2  640.54   30.50
   4   0   2  626.24   30.50
  -4   0  -2  618.34   30.60
   4   0   2  617.14   30.60
  -4   0  -3    0.70    0.80
   4   0   3   -0.40    0.80
   4   0   3   -0.30    1.20
   4   0   3    1.10    0.90
  -4   0  -3    0.30    0.80
  -4   0  -3   -0.40    1.10
   4   0   4    0.30    1.00
   4   0   4    2.30    1.60
   4   0   4    0.30    1.00
  -4   0  -4   -0.20    0.90
  -4   0  -4    0.80    1.00
  -4   0  -4   -2.30    1.30
  -4   0  -5   -0.90    1.50
   4   0   5   -0.30    1.00
  -4   0  -5   -0.90    0.90
   4   0   5   -0.20    1.00
  -4   0  -5    0.40    1.00
   4   0   6   -0.70    1.20
  -4   0  -6   -0.60    1.20
  -4   0  -6    2.20    1.70
   4   0   7   -1.40    1.30
   4   0   8   27.20    2.60
   4   0   9    0.00    1.60
  -4   0 -10   21.20    2.60
   4   0  10   14.00    2.20
  -4   0 -11   -1.00    1.90
   4   0  11   -1.10    1.90
  -4   0 -12   10.80    2.50
   4   0  12    7.70    2.20
  -4   0 -13    2.20    2.30
   4   0  13    2.50    2.30
   4   1 -14    9.90    3.20
  -4   1  14    8.80    2.90
   4  -1 -14    2.30    2.80
  -4  -1  14    8.80    2.50
   4   1 -13   65.39    5.90
  -4   1  13   68.99    5.80
   4  -1 -13   64.59    5.70
  -4  -1  13   65.79    5.30
   4   1 -12   27.90    3.40
  -4   1  12   28.50    3.30
  -4  -1  12   29.30    3.10
   4  -1 -12   20.30    3.10
  -4   1  11   11.40    2.60
   4   1 -11   12.00    2.50
  -4  -1  11   14.70    2.60
   4  -1 -11   11.20    2.60
   4   1 -10    1.80    2.10
  -4   1  10    6.00    2.20
  -4  -1  10    4.10    2.00
   4  -1 -10    7.40    2.30
   4   1  -9    1.00    1.80
  -4   1   9    3.10    1.90
   4  -1  -9    1.90    1.90
  -4  -1   9    3.80    1.90
  -4   1   8   56.59    4.00
   4   1  -8   50.69    3.90
   4  -1  -8   46.40    3.80
  -4  -1   8   49.90    3.80
   4   1  -7  190.28    9.50
  -4   1   7  164.78    9.50
  -4  -1   7  178.78    9.50
   4  -1  -7  181.28    9.50
  -4  -1   7  185.98    9.30
   4   1  -6  279.97   14.00
  -4   1   6  274.77   14.00
  -4   1   6  257.57   13.90
   4   1  -6  293.47   13.90
   4  -1  -6  262.07   14.40
   4  -1  -6  262.67   14.00
   4  -1  -6  295.07   14.00
  -4  -1   6  293.67   14.00
  -4  -1   6  280.57   13.90
   4   1  -5   49.30    3.10
  -4   1   5   48.70    3.10
   4   1  -5   41.20    3.10
  -4   1   5   43.60    3.20
  -4  -1   5   49.10    3.20
   4  -1  -5   49.90    3.10
   4  -1  -5   44.50    3.20
  -4  -1   5   50.69    3.00
   4  -1  -5   47.10    3.60
  -4   1   4   14.40    1.40
   4   1  -4   13.80    1.40
  -4   1   4   13.20    1.40
   4   1  -4   15.80    1.30
   4  -1  -4   12.10    1.90
   4  -1  -4   12.50    1.20
   4  -1  -4   14.20    1.50
  -4  -1   4    9.30    1.30
  -4  -1   4   11.30    1.20
   4   1  -3    4.20    0.90
   4   1  -3    2.90    0.80
  -4   1   3    4.10    0.90
  -4   1   3    5.20    1.00
   4  -1  -3    3.90    0.80
   4  -1  -3    5.10    1.50
  -4  -1   3    4.50    0.80
   4  -1  -3    3.40    1.00
  -4  -1   3    3.60    0.90
   4   1  -2 8167.18  433.36
  -4   1   2 8960.70  433.56
   4   1  -2 8050.39  433.56
  -4   1   2 9293.37  433.76
   4  -1  -2 9999.00  433.76
   4  -1  -2 8660.33  434.46
  -4  -1   2 9065.99  433.46
  -4  -1   2 9467.75  433.66
   4  -1  -2 8991.50  433.66
  -4   1   1  714.43   38.90
  -4   1   1  825.72   38.90
   4   1  -1  803.12   38.90
   4   1  -1  855.11   38.90
   4  -1  -1  737.03   38.90
   4  -1  -1  810.22   39.00
  -4  -1   1  814.92   38.90
  -4  -1   1  839.72   38.90
   4  -1  -1  828.02   38.90
   4   1   0   43.40    2.30
  -4   1   0   38.40    2.20
   4   1   0   44.10    2.30
  -4   1   0   42.20    2.20
  -4  -1   0   40.10    2.20
   4  -1   0   33.10    2.30
  -4  -1   0   40.80    2.20
   4  -1   0   42.70    2.20
   4   1   1    4.40    1.00
   4   1   1    3.40    0.60
  -4   1  -1    2.30    0.50
   4   1   1    4.20    0.70
  -4   1  -1    3.10    0.60
  -4  -1  -1    3.50    0.60
   4  -1   1    3.20    0.60
   4  -1   1    2.70    0.60
  -4  -1  -1    3.40    0.60
  -4   1  -2  256.97   13.20
   4   1   2  280.57   13.20
  -4   1  -2  270.27   13.10
  -4   1  -2  256.67   13.20
   4   1   2  268.77   13.40
  -4  -1  -2  248.88   13.20
  -4  -1  -2  273.97   13.30
   4  -1   2  274.27   13.20
   4  -1   2  281.37   13.20
  -4  -1  -2  266.77   13.20
  -4   1  -3  635.64   30.30
  -4   1  -3  657.03   30.30
  -4   1  -3  642.54   30.30
   4   1   3  624.54   30.30
   4   1   3  632.54   30.50
   4  -1   3  611.44   30.30
  -4  -1  -3  635.94   30.50
  -4  -1  -3  533.55   30.30
  -4  -1  -3  617.24   30.30
   4   1   4   77.99    4.30
   4   1   4   64.19    4.30
  -4   1  -4   75.79    4.30
  -4   1  -4   74.69    4.50
   4   1   4   73.59    4.70
  -4   1  -4   82.29    4.20
   4  -1   4   75.09    4.20
  -4  -1  -4   77.19    4.20
  -4  -1  -4   75.39    4.30
   4  -1   4   78.09    4.30
  -4  -1  -4   77.89    4.60
   4   1   5   12.90    1.50
  -4   1  -5   13.30    1.40
   4   1   5   15.30    2.30
   4   1   5    8.60    1.40
  -4   1  -5   13.60    1.90
  -4  -1  -5   14.30    2.00
  -4  -1  -5   10.40    1.40
   4  -1   5   13.50    1.40
  -4  -1  -5   11.10    1.40
   4  -1   5    7.90    1.30
   4   1   6   21.20    2.80
  -4   1  -6   21.10    2.60
   4   1   6   12.80    1.70
  -4  -1  -6   17.80    2.50
   4  -1   6   16.80    1.70
   4  -1   6   17.20    1.70
  -4  -1  -6   14.00    1.70
  -4   1  -7   19.30    2.10
  -4   1  -7   22.10    3.00
   4   1   7   20.50    2.20
   4  -1   7   24.40    2.40
  -4  -1  -7   17.90    1.90
   4   1   8    2.40    1.70
   4  -1   8    2.50    1.50
  -4  -1  -8    2.40    1.60
   4   1   9   -1.60    1.70
   4  -1   9   -1.00    1.60
  -4  -1  -9   -2.80    1.60
   4   1  10    0.30    2.00
   4  -1  10    2.90    1.70
  -4  -1 -10   -0.40    1.70
   4   1  11    0.30    2.00
   4  -1  11    1.60    1.80
  -4  -1 -11   -1.70    1.70
   4   1  12    6.90    2.50
  -4   1 -12    4.90    2.30
  -4  -1 -12    4.90    2.20
   4  -1  12    5.30    2.20
   4   1  13    9.00    2.60
  -4   1 -13    8.70    2.60
   4  -1  13    7.20    2.30
  -4  -1 -13    7.00    2.50
   4   2 -14    3.40    3.00
  -4   2  14    6.80    3.00
   4  -2 -14   -0.40    2.70
  -4  -2  14    1.80    2.10
  -4   2  13   14.50    3.20
   4   2 -13   14.20    3.10
  -4  -2  13   12.00    2.40
   4  -2 -13   11.10    2.70
   4   2 -12    5.00    2.60
  -4   2  12    5.20    2.70
   4  -2 -12    6.10    2.40
  -4  -2  12    5.60    2.00
   4   2 -11   26.80    3.10
  -4   2  11   24.60    3.20
   4  -2 -11   20.30    2.90
  -4  -2  11   24.10    2.60
  -4   2  10    0.10    2.20
   4   2 -10    7.50    2.30
   4  -2 -10    3.20    2.10
  -4  -2  10    6.10    2.00
  -4   2   9   31.50    3.20
   4   2  -9   26.90    2.90
   4  -2  -9   30.70    3.00
  -4  -2   9   34.20    2.80
   4   2  -8   -3.00    1.70
  -4   2   8   -3.50    1.70
   4  -2  -8   -2.70    1.60
  -4  -2   8   -3.50    1.40
  -4  -2   8   -1.30    1.20
  -4   2   7    9.90    1.80
   4   2  -7    9.40    1.70
  -4  -2   7    6.10    1.40
  -4  -2   7    9.60    1.30
   4  -2  -7    9.60    1.80
   4  -2  -7    9.90    1.70
   4   2  -6    5.70    1.20
   4   2  -6    3.90    1.40
  -4   2   6    4.60    1.50
  -4   2   6    5.40    1.60
  -4  -2   6    3.30    1.30
   4  -2  -6    4.50    1.20
  -4  -2   6    4.60    1.00
   4  -2  -6    4.80    1.90
   4  -2  -6    2.30    1.30
   4   2  -5  341.67   16.10
   4   2  -5  331.97   16.20
  -4   2   5  286.87   16.20
  -4   2   5  313.27   16.20
   4  -2  -5  306.87   16.20
  -4  -2   5  325.17   16.10
   4  -2  -5  352.56   16.10
  -4  -2   5  335.97   16.00
   4  -2  -5  333.27   16.60
   4   2  -4  133.89    6.60
   4   2  -4  132.19    6.60
  -4   2   4  132.19    6.70
  -4   2   4  109.99    6.60
   4  -2  -4  129.29    6.90
  -4  -2   4  130.59    6.60
   4  -2  -4  116.09    6.50
  -4  -2   4  127.09    6.40
   4  -2  -4  134.89    6.70
  -4   2   3  422.66   21.00
  -4   2   3  402.16   21.00
  -4   2   3  438.66   21.30
   4   2  -3  450.05   21.00
   4   2  -3  468.05   21.00
   4  -2  -3  433.46   21.00
  -4  -2   3  377.66   21.00
  -4  -2   3  425.36   20.90
   4  -2  -3  450.15   21.00
   4  -2  -3  427.46   21.30
   4   2  -2  563.14   25.00
  -4   2   2  537.25   25.10
   4   2  -2  500.55   25.00
  -4   2   2  486.05   25.00
  -4   2   2  525.95   25.30
  -4  -2   2  530.65   25.00
   4  -2  -2  471.45   25.00
  -4  -2   2  475.55   25.00
   4  -2  -2  531.15   25.10
   4  -2  -2  521.65   25.20
  -4   2   1  115.09    6.10
  -4   2   1  126.19    6.10
  -4   2   1  120.49    6.20
   4   2  -1  123.39    6.10
   4   2  -1  116.79    6.10
   4  -2  -1  118.39    6.10
  -4  -2   1  127.69    6.10
   4  -2  -1  127.69    6.20
  -4  -2   1  123.49    6.10
   4  -2  -1  123.39    6.20
  -4   2   0   83.99    4.30
  -4   2   0   86.49    4.20
   4   2   0   77.59    4.30
  -4   2   0   82.49    4.30
   4   2   0   90.19    4.30
   4  -2   0   84.19    4.20
  -4  -2   0   87.19    4.30
   4  -2   0   83.19    4.30
  -4  -2   0   78.29    4.20
   4   2   1    0.00    0.50
   4   2   1    0.10    0.60
   4   2   1   -0.20    1.00
  -4   2  -1    0.00    0.50
  -4   2  -1    0.60    0.40
  -4  -2  -1    0.10    0.50
  -4  -2  -1    0.00    0.60
   4  -2   1    0.40    0.50
   4  -2   1   -0.80    0.50
  -4   2  -2   -0.40    0.50
   4   2   2   -0.50    1.30
   4   2   2   -0.10    0.80
   4   2   2    0.10    0.60
  -4   2  -2   -0.10    0.70
  -4  -2  -2    0.80    0.70
   4  -2   2    1.50    0.70
   4  -2   2    1.20    0.60
  -4  -2  -2    0.00    0.50
   4   2   3   82.59    4.70
  -4   2  -3   90.59    4.50
  -4   2  -3   84.29    4.60
   4   2   3   79.19    5.00
   4  -2   3   88.89    4.40
  -4  -2  -3   84.99    4.60
  -4  -2  -3   80.79    4.50
  -4  -2  -3   82.19    4.90
   4  -2   3   89.69    4.60
   4   2   4   81.29    4.60
   4   2   4   79.69    5.10
  -4   2  -4   90.69    4.50
   4   2   4   72.19    4.70
  -4  -2  -4   81.09    4.50
  -4  -2  -4   88.29    4.70
   4  -2   4   84.69    4.50
   4  -2   4   88.29    4.40
  -4  -2  -4   79.39    4.90
  -4   2  -5    2.10    1.20
  -4   2  -5   -1.20    1.50
  -4   2  -5    1.10    1.10
   4   2   5    1.60    1.90
   4   2   5    0.90    1.30
   4  -2   5   -1.50    0.90
  -4  -2  -5    1.00    1.50
   4  -2   5    0.10    0.90
  -4  -2  -5   -0.30    0.90
  -4  -2  -5    1.30    1.10
  -4   2  -6   74.69    4.90
   4   2   6   68.69    4.70
   4   2   6   81.19    5.40
  -4   2  -6   75.69    4.60
  -4  -2  -6   75.69    4.50
   4  -2   6   86.79    4.40
   4  -2   6   73.69    4.50
   4   2   7    2.80    2.60
   4   2   7   -1.10    1.70
  -4   2  -7    1.40    1.60
  -4   2  -7    2.10    2.10
  -4  -2  -7    0.60    1.40
   4  -2   7    1.50    1.20
   4   2   8   13.10    3.50
  -4   2  -8    9.40    2.00
   4   2   8    8.80    2.10
  -4  -2  -8   12.10    1.90
   4  -2   8   12.60    1.70
  -4   2  -9   -1.00    1.80
   4   2   9   -1.50    1.90
   4  -2   9    0.80    1.50
  -4  -2  -9    2.00    1.60
   4   2  10   15.10    2.60
  -4  -2 -10   11.10    2.10
   4  -2  10   13.70    2.00
   4   2  11    4.20    2.40
  -4  -2 -11    0.00    1.80
   4  -2  11    2.60    1.70
   4   2  12    1.20    2.40
   4  -2  12   -1.30    1.80
  -4  -2 -12   -1.40    1.90
   4   2  13    5.60    2.70
  -4   2 -13    0.90    2.50
   4  -2  13    3.40    2.10
  -4  -2 -13    3.40    2.30
   4   3 -14    3.80    3.00
  -4   3  14    4.00    3.20
   4  -3 -14    5.30    2.70
  -4  -3  14    1.30    2.00
   4   3 -13   -1.10    2.70
  -4   3  13    4.00    3.00
  -4  -3  13    0.40    1.80
   4  -3 -13    0.00    2.40
   4   3 -12    3.60    2.50
  -4   3  12    2.00    2.60
  -4  -3  12    3.10    1.70
   4  -3 -12    2.10    2.20
  -4   3  11    1.80    2.50
   4   3 -11    4.80    2.30
  -4  -3  11    3.30    1.70
   4  -3 -11    2.00    2.10
   4   3 -10   12.20    2.50
  -4   3  10   11.80    2.70
   4  -3 -10   13.50    2.40
  -4  -3  10   14.20    2.00
  -4   3   9   44.20    3.60
   4   3  -9   34.50    3.20
  -4  -3   9   37.00    3.10
   4  -3  -9   35.90    3.60
  -4  -3   9   34.30    3.30
   4   3  -8   19.40    2.40
  -4   3   8   22.80    2.70
   4  -3  -8   28.60    2.50
  -4  -3   8   27.10    2.30
  -4  -3   8   23.50    2.30
   4   3  -7   27.70    2.80
  -4   3   7   23.30    2.40
  -4  -3   7   27.80    2.50
  -4  -3   7   29.70    2.10
   4  -3  -7   26.50    2.50
   4  -3  -7   24.60    2.30
   4   3  -6   61.69    3.80
  -4   3   6   60.79    4.10
   4   3  -6   71.59    4.00
  -4   3   6   59.79    4.70
   4  -3  -6   60.49    3.80
  -4  -3   6   63.59    3.70
   4  -3  -6   65.69    4.00
  -4  -3   6   62.39    3.50
  -4   3   5   57.99    4.30
  -4   3   5   47.00    3.50
   4   3  -5   55.49    3.30
   4   3  -5   53.69    3.20
  -4   3   5   46.30    3.30
   4  -3  -5   51.89    3.10
   4  -3  -5   51.99    3.30
   4  -3  -5   51.69    3.80
  -4  -3   5   54.69    2.90
  -4  -3   5   53.49    3.10
  -4   3   4  302.37   14.60
   4   3  -4  290.87   14.50
   4   3  -4  311.87   14.60
  -4   3   4  301.17   15.10
  -4   3   4  272.97   14.60
   4  -3  -4  301.27   14.60
  -4  -3   4  298.27   14.40
   4  -3  -4  286.17   14.90
  -4  -3   4  301.47   14.50
   4  -3  -4  276.47   14.50
  -4   3   3  272.37   14.10
  -4   3   3  287.17   13.70
  -4   3   3  268.37   13.70
   4   3  -3  288.47   13.60
   4   3  -3  265.77   13.60
   4  -3  -3  278.17   13.50
  -4  -3   3  269.17   13.50
  -4  -3   3  287.97   13.50
   4  -3  -3  279.97   14.00
   4  -3  -3  265.97   13.60
  -4   3   2   24.90    2.30
  -4   3   2   26.40    1.80
   4   3  -2   24.50    1.70
   4   3  -2   27.00    1.60
  -4   3   2   27.40    1.90
   4  -3  -2   27.00    1.50
   4  -3  -2   24.70    2.10
   4  -3  -2   24.10    1.80
  -4  -3   2   24.60    1.60
  -4  -3   2   26.30    1.50
  -4   3   1   -0.40    0.40
   4   3  -1    0.00    0.50
  -4   3   1   -0.10    0.60
   4   3  -1   -0.10    0.50
  -4   3   1   -0.50    1.00
  -4  -3   1   -0.60    0.40
   4  -3  -1    0.20    0.80
   4  -3  -1    0.20    0.50
   4  -3  -1    0.40    0.30
  -4  -3   1   -0.40    0.50
  -4   3   0  793.02   38.40
   4   3   0  736.43   38.30
   4   3   0  754.32   38.30
  -4   3   0  840.62   38.30
  -4   3   0  805.32   38.30
  -4  -3   0  763.32   38.30
  -4  -3   0  812.82   38.30
   4  -3   0  817.12   38.20
   4   3   1  113.79    6.40
  -4   3  -1  112.49    5.70
  -4   3  -1  114.79    5.80
   4   3   1  118.09    5.80
   4   3   1  113.69    5.90
  -4  -3  -1  108.89    5.80
   4  -3   1  114.49    5.70
   4  -3   1  115.69    5.70
  -4  -3  -1  120.39    5.70
   4   3   2  183.58   10.60
   4   3   2  208.48   11.00
  -4   3  -2  205.68   10.40
  -4   3  -2  212.68   10.50
   4   3   2  222.18   10.50
   4  -3   2  222.88   10.40
  -4  -3  -2  225.88   10.60
  -4  -3  -2  216.88   10.50
   4  -3   2  206.78   10.40
   4   3   3   91.79    4.80
  -4   3  -3   90.19    4.60
   4   3   3   83.99    5.30
   4  -3   3   88.79    4.60
  -4  -3  -3   79.29    4.50
  -4  -3  -3   88.09    4.70
   4  -3   3   89.39    4.50
   4   3   4    0.70    1.10
   4   3   4    1.70    1.90
  -4   3  -4    0.50    0.70
   4   3   4    0.80    1.00
  -4   3  -4    0.80    1.00
  -4  -3  -4    1.70    1.00
  -4  -3  -4    2.20    1.60
  -4  -3  -4    0.80    0.80
   4  -3   4    1.40    0.80
   4  -3   4    1.80    0.60
   4   3   5    8.90    1.50
   4   3   5   14.60    2.60
  -4   3  -5   10.50    1.40
   4  -3   5   12.40    1.10
   4  -3   5   13.00    1.30
  -4  -3  -5   13.30    1.50
  -4  -3  -5    9.50    1.20
  -4   3  -6  493.55   24.30
   4   3   6  492.25   25.10
   4   3   6  514.15   24.40
   4  -3   6  509.55   24.20
   4  -3   6  463.05   24.10
  -4  -3  -6  476.85   24.20
  -4   3  -7  239.78   12.60
   4   3   7  236.28   13.20
   4   3   7  229.78   12.40
  -4   3  -7  228.28   12.20
   4  -3   7  248.38   12.10
  -4  -3  -7  234.08   12.10
   4  -3   7  231.38   11.90
  -4   3  -8   73.89    5.10
   4   3   8   68.59    6.30
   4   3   8   73.29    5.20
  -4  -3  -8   78.39    4.70
   4  -3   8   74.89    4.50
   4   3   9   -1.70    2.90
   4   3   9   -0.10    2.10
  -4   3  -9    0.50    1.90
   4  -3   9    0.40    1.30
  -4  -3  -9   -0.70    1.50
  -4   3 -10    3.90    2.10
   4   3  10    2.20    2.20
   4  -3  10    2.80    1.50
  -4  -3 -10    2.40    1.80
   4   3  11   15.60    2.90
  -4  -3 -11   15.50    2.30
   4  -3  11   18.30    2.20
   4   3  12    6.40    2.80
  -4  -3 -12    2.20    2.20
   4  -3  12    2.70    1.90
   4   3  13    1.30    2.70
  -4   3 -13    1.60    2.50
   4  -3  13   -1.20    1.80
  -4  -3 -13   -0.50    2.20
  -4   4  13    1.30    2.90
   4   4 -13   -0.50    2.70
   4  -4 -13   -1.20    2.20
  -4  -4  13   -0.30    1.60
   4   4 -12   -1.30    2.40
  -4   4  12   -1.00    2.80
  -4  -4  12   -0.10    1.50
   4  -4 -12   -2.10    2.00
  -4   4  11    4.80    2.60
   4   4 -11    5.40    2.30
   4  -4 -11    5.20    2.10
  -4  -4  11    3.20    1.40
   4   4 -10   26.10    3.00
  -4   4  10   30.40    3.40
   4  -4 -10   24.90    2.70
  -4  -4  10   28.20    2.70
   4   4  -9   -3.70    1.80
  -4   4   9   -4.00    2.20
  -4  -4   9   -1.30    1.20
   4  -4  -9   -1.10    1.60
  -4  -4   9   -2.90    0.90
   4   4  -8   -4.60    1.60
  -4   4   8   -3.80    2.00
   4  -4  -8   -0.60    1.40
  -4  -4   8   -1.50    0.90
  -4  -4   8   -3.20    1.10
  -4   4   7   19.30    3.50
  -4   4   7    9.50    2.00
   4   4  -7   11.80    1.80
  -4  -4   7   12.80    1.20
  -4  -4   7   11.50    1.30
   4  -4  -7   14.10    1.60
   4  -4  -7   13.50    1.70
  -4   4   6   79.29    4.70
  -4   4   6   76.09    5.70
   4   4  -6   78.19    4.50
   4   4  -6   82.19    5.30
   4  -4  -6   77.09    4.50
  -4  -4   6   77.09    4.10
  -4  -4   6   75.19    4.00
   4  -4  -6   74.59    4.30
  -4   4   5  157.08    8.20
  -4   4   5  145.29    7.90
   4   4  -5  147.89    7.70
  -4   4   5  146.69    8.60
   4   4  -5  152.08    7.70
   4  -4  -5  153.18    7.60
   4  -4  -5  146.09    7.70
  -4  -4   5  150.58    7.40
  -4  -4   5  149.29    7.40
  -4   4   4    5.30    1.10
   4   4  -4    9.00    1.10
  -4   4   4    6.90    1.20
  -4   4   4    6.50    2.10
   4   4  -4    6.50    1.00
   4  -4  -4    6.90    0.80
   4  -4  -4    5.40    0.90
   4  -4  -4    8.20    1.80
  -4   4   3   35.40    2.40
   4   4  -3   36.50    2.20
   4   4  -3   35.40    2.10
  -4   4   3   26.80    3.20
  -4   4   3   32.30    2.30
   4  -4  -3   34.40    1.90
   4  -4  -3   32.40    2.60
   4  -4  -3   34.30    2.00
  -4   4   2   20.00    1.70
   4   4  -2   21.20    1.50
  -4   4   2   17.00    2.20
  -4   4   2   19.80    1.50
   4   4  -2   20.70    1.40
   4  -4  -2   20.20    1.90
  -4   4   1   31.50    1.80
   4   4  -1   30.30    1.80
  -4   4   1   30.60    2.00
  -4   4   1   30.00    2.50
   4   4  -1   32.50    1.80
  -4   4   0  142.19    7.20
   4   4   0  153.78    7.20
  -4   4   0  148.29    7.20
  -4   4   0  143.89    7.60
   4   4   0  139.29    7.30
  -4   4  -1   16.30    1.20
   4   4   1   17.10    1.50
  -4   4  -1   17.10    1.70
   4   4   1   17.10    1.30
  -4   4  -1   15.20    1.20
   4   4   1   16.90    2.20
  -4  -4  -1   16.00    1.10
  -4  -4  -1   18.10    1.20
   4   4   2    6.80    0.90
  -4   4  -2    7.40    0.70
  -4   4  -2    5.70    0.80
   4   4   2    9.40    2.00
   4   4   2    6.00    1.00
  -4  -4  -2    6.80    0.90
  -4  -4  -2    7.20    0.70
  -4   4  -3   47.30    2.70
   4   4   3   49.60    3.10
   4   4   3   44.80    3.80
  -4  -4  -3   47.00    2.90
  -4  -4  -3   49.70    2.70
   4   4   4   31.50    3.60
  -4   4  -4   33.90    2.20
   4   4   4   36.30    2.70
   4  -4   4   34.10    1.90
  -4  -4  -4   36.10    2.50
   4  -4   4   33.90    2.00
  -4  -4  -4   32.20    2.20
   4   4   5   16.50    2.90
  -4   4  -5   13.10    1.60
   4   4   5   17.30    1.90
  -4  -4  -5   19.20    1.80
   4  -4   5   15.30    1.50
   4  -4   5   15.60    1.60
  -4  -4  -5   17.20    1.70
  -4   4  -6  136.59    7.20
   4   4   6  121.09    8.30
   4   4   6  140.19    7.50
  -4  -4  -6  132.09    7.00
   4  -4   6  136.79    6.70
   4  -4   6  127.29    6.80
  -4  -4  -6  119.99    7.10
   4   4   7   49.90    5.40
  -4   4  -7   56.09    3.90
   4   4   7   49.90    4.30
   4  -4   7   45.90    3.30
   4  -4   7   49.10    3.20
  -4  -4  -7   48.70    3.60
   4   4   8    2.90    2.10
   4   4   8    2.40    3.10
  -4   4  -8    3.00    1.80
  -4  -4  -8    3.80    1.50
   4  -4   8    3.80    1.10
   4   4   9   26.00    3.20
  -4   4  -9   25.00    2.80
   4   4   9   31.60    4.70
  -4  -4  -9   25.60    2.50
   4  -4   9   31.10    2.60
  -4   4 -10   30.20    3.10
   4   4  10   28.20    3.30
   4   4  10   36.00    5.30
   4  -4  10   36.10    2.90
  -4  -4 -10   26.70    2.70
   4   4  11   -0.10    2.50
  -4  -4 -11   -1.00    1.80
   4  -4  11   -0.30    1.40
   4   4  12    4.50    2.70
  -4  -4 -12   -0.40    2.00
   4  -4  12   -0.40    1.60
   4   5 -13   -0.20    2.80
  -4   5  13   10.20    3.30
   4   5 -12    5.50    2.70
  -4   5  12    6.70    3.00
   4   5 -11    3.50    2.30
  -4   5  11   10.00    2.80
   4  -5 -11    6.60    2.00
  -4  -5  11    5.60    1.20
   4   5 -10   14.10    2.60
  -4   5  10   14.30    2.80
   4  -5 -10   16.60    2.20
  -4  -5  10   17.30    1.50
   4   5  -9    6.30    2.10
  -4   5   9    7.10    2.40
   4  -5  -9   11.10    1.80
  -4  -5   9    6.60    1.00
  -4   5   8   62.79    6.20
   4   5  -8   67.59    4.50
  -4   5   8   63.39    4.80
  -4  -5   8   63.09    3.40
   4  -5  -8   59.39    4.10
   4  -5  -8   62.89    3.90
  -4  -5   8   65.39    3.40
   4   5  -7    0.70    1.50
  -4   5   7    1.50    3.20
  -4   5   7   -0.30    1.80
   4  -5  -7   -0.90    1.00
   4  -5  -7    0.00    1.10
  -4   5   6   15.60    3.40
   4   5  -6   13.90    1.60
  -4   5   6   12.40    1.90
   4  -5  -6   13.80    1.20
   4  -5  -6    9.50    1.30
   4   5  -5   28.10    2.30
   4   5  -5   28.60    2.40
  -4   5   5   28.50    3.70
  -4   5   5   30.00    2.70
   4  -5  -5   27.60    1.80
  -4   5   4  100.99    6.40
  -4   5   4  104.69    5.50
  -4   5   4   92.59    5.50
   4   5  -4  107.69    5.30
   4   5  -4  104.29    5.30
   4  -5  -4   97.49    5.00
   4  -5  -4  100.49    5.00
   4   5  -3   69.89    3.60
  -4   5   3   60.79    3.80
  -4   5   3   67.69    3.80
  -4   5   3   65.89    4.70
   4   5  -3   68.39    3.50
   4  -5  -3   64.69    4.20
  -4   5   2   25.10    1.70
   4   5  -2   24.10    1.50
  -4   5   2   23.70    1.90
   4   5  -2   25.60    1.70
  -4   5   2   22.40    2.80
  -4   5   1   82.49    4.90
   4   5  -1   84.49    4.20
   4   5  -1   79.39    4.20
  -4   5   1   81.59    4.20
  -4   5   1   80.79    4.30
   4   5   0   40.70    2.20
   4   5   0   38.10    2.30
  -4   5   0   40.20    2.20
  -4   5   0   41.50    3.00
  -4   5   0   38.80    2.20
  -4   5  -1  235.48   12.30
   4   5   1  239.48   12.80
   4   5   1  248.48   12.00
   4   5   1  241.48   12.10
  -4   5  -1  239.18   11.90
  -4   5  -1  254.57   11.90
   4   5   2   86.69    5.60
   4   5   2   91.39    4.80
   4   5   2   94.89    4.70
  -4   5  -2   85.19    4.60
  -4   5  -2   86.19    4.50
   4   5   3   13.60    2.60
   4   5   3    9.30    1.30
  -4   5  -3    9.20    0.90
  -4   5  -3   10.00    1.10
  -4  -5  -3   11.40    1.10
  -4  -5  -3   10.40    1.00
   4   5   4    0.70    2.30
   4   5   4    1.70    1.30
  -4   5  -4    1.10    0.80
  -4  -5  -4    0.00    0.90
  -4  -5  -4    1.10    0.70
  -4   5  -5   22.50    2.20
   4   5   5   14.60    2.00
   4   5   5   25.50    3.70
  -4  -5  -5   15.40    1.60
  -4  -5  -5   15.80    1.40
  -4   5  -6    5.00    1.40
   4   5   6    2.60    1.80
   4   5   6    6.80    3.20
  -4  -5  -6    1.90    1.00
  -4  -5  -6    3.70    1.30
  -4   5  -7   63.29    4.20
   4   5   7   62.09    5.50
   4   5   7   56.59    4.60
   4  -5   7   57.89    3.20
   4  -5   7   59.69    3.50
  -4  -5  -7   57.59    3.80
   4   5   8  112.79    8.40
   4   5   8  126.29    7.20
  -4   5  -8  116.69    6.80
  -4  -5  -8  113.29    6.50
   4  -5   8  118.79    6.00
   4   5   9   -5.10    2.80
   4   5   9    1.80    2.30
  -4   5  -9   -0.80    1.90
  -4  -5  -9    0.40    1.40
   4  -5   9    1.50    0.90
   4   5  10    0.30    2.40
   4   5  10   -2.30    3.90
   4  -5  10    3.40    1.20
  -4  -5 -10    3.80    1.70
   4   5  11    1.80    2.70
   4   5  11   -1.20    4.30
  -4  -5 -11    0.20    1.80
  -4   6  12    3.60    3.00
   4   6 -12    1.90    2.60
   4  -6 -12    1.80    1.70
   4   6 -11    0.80    2.30
  -4   6  11    1.90    2.80
   4  -6 -11    0.40    1.50
  -4   6  10    4.10    2.60
   4   6 -10    1.60    2.20
   4  -6 -10    1.80    1.40
  -4   6   9   -1.70    2.20
   4   6  -9   -1.40    1.80
  -4   6   9   -3.20    3.60
   4  -6  -9    0.70    1.10
  -4   6   8    0.60    3.50
   4   6  -8   -0.70    1.60
  -4   6   8   -0.40    2.00
   4  -6  -8   -1.00    1.00
  -4   6   7   11.80    2.20
   4   6  -7   14.40    1.90
  -4   6   7   17.30    3.60
   4  -6  -7   11.90    1.20
   4   6  -6   -1.90    1.20
  -4   6   6    2.20    1.60
  -4   6   6    0.30    2.60
   4  -6  -6    0.10    0.60
   4  -6  -6    0.20    0.50
   4   6  -5    0.30    1.10
  -4   6   5    1.50    1.40
  -4   6   5   -2.50    2.60
   4   6  -5   -1.30    1.00
  -4   6   4    6.40    1.30
   4   6  -4    4.80    1.00
  -4   6   4    5.80    2.60
   4   6  -4    5.80    1.00
  -4   6   3   93.49    5.20
  -4   6   3   95.99    5.20
   4   6  -3  100.19    5.00
  -4   6   3   88.39    6.10
   4   6  -3   95.99    4.90
   4   6  -2    7.60    0.80
  -4   6   2    8.10    1.00
   4   6  -2    7.00    0.80
  -4   6   2    6.90    1.10
  -4   6   2    7.30    2.30
  -4   6   1  320.97   16.50
   4   6  -1  333.67   15.70
  -4   6   1  300.87   15.70
  -4   6   1  331.57   15.80
   4   6  -1  320.37   15.70
   4   6   0   18.70    1.40
  -4   6   0   20.70    2.40
   4   6   0   17.20    1.50
  -4   6   0   17.90    1.40
  -4   6   0   18.20    1.30
   4   6   0   24.30    3.00
   4   6   1   81.29    5.60
   4   6   1   78.69    4.30
  -4   6  -1   78.69    4.00
   4   6   1   80.69    4.20
  -4   6  -1   77.99    4.00
  -4   6  -1   77.19    4.90
   4   6   2   41.90    2.80
  -4   6  -2   43.10    2.40
  -4   6  -2   38.90    2.30
   4   6   2   40.70    2.60
  -4   6  -2   41.30    3.30
   4   6   2   40.10    4.10
  -4   6  -3  119.09    6.30
   4   6   3  129.89    6.60
   4   6   3  122.29    7.70
  -4   6  -3  120.59    6.20
   4   6   4    2.70    1.40
  -4   6  -4    0.70    1.00
  -4   6  -4    1.30    0.80
   4   6   4    4.30    2.60
  -4  -6  -4    1.60    0.50
  -4  -6  -4    1.10    0.50
   4   6   5   26.30    3.70
   4   6   5   16.00    2.10
  -4  -6  -5   19.30    1.60
  -4  -6  -5   18.20    1.80
   4   6   6    7.80    2.00
   4   6   6   10.90    3.40
  -4  -6  -6    8.40    1.10
   4   6   7    8.20    2.20
   4   6   7    8.60    3.40
  -4  -6  -7    5.10    1.10
   4   6   8   29.70    3.20
   4   6   8   37.20    5.00
  -4  -6  -8   31.10    2.70
   4   6   9   45.40    4.00
   4   6   9   43.00    5.90
  -4  -6  -9   38.50    3.40
   4   6  10    3.70    2.70
   4   6  10   -2.90    4.00
  -4  -6 -10    1.40    1.60
   4   6  11   -9.40    4.00
   4   6  11    1.10    2.80
  -4  -6 -11    1.90    1.70
  -4   7  11    0.50    2.90
  -4   7  10   -0.20    2.50
  -4   7   9    3.90    2.40
   4   7  -9    0.00    2.30
  -4   7   9   -2.10    3.60
  -4   7   8    5.20    2.20
  -4   7   8    6.70    4.00
   4   7  -8    8.00    1.90
   4   7  -7   20.60    2.30
  -4   7   7   26.90    2.70
  -4   7   7   27.90    4.40
  -4   7   6   19.50    3.80
  -4   7   6   23.30    2.40
   4   7  -6   20.80    2.00
   4   7  -5   -0.70    1.10
  -4   7   5    1.40    2.80
  -4   7   5   -1.50    1.50
  -4   7   4    3.60    1.40
   4   7  -4    4.80    1.00
  -4   7   4    7.00    2.90
   4   7  -4    6.90    1.10
  -4   7   3   68.39    4.10
  -4   7   3   71.79    4.20
  -4   7   3   70.99    5.40
   4   7  -3   67.49    3.70
   4   7  -3   68.79    3.70
  -4   7   2  163.28    8.40
   4   7  -2  166.08    8.20
  -4   7   2  162.58    8.40
   4   7  -2  163.08    8.20
  -4   7   2  170.78    9.50
  -4   7   1  138.09    7.00
  -4   7   1  143.69    8.10
   4   7  -1  138.09    6.90
   4   7  -1  138.79    6.90
  -4   7   1  134.09    7.00
   4   7   0    0.40    0.70
   4   7   0    0.30    0.60
  -4   7   0   -0.90    0.60
  -4   7   0   -0.50    0.50
  -4   7   0    2.80    2.10
   4   7   0    3.00    2.50
  -4   7  -1    0.00    0.50
   4   7   1    0.10    0.70
   4   7   1   -0.40    2.40
  -4   7  -1    0.20    0.50
  -4   7  -1    1.70    1.90
   4   7   1    0.70    0.80
   4   7   2    5.40    2.60
  -4   7  -2    2.50    0.60
  -4   7  -2    1.70    0.60
   4   7   2    2.90    1.10
  -4   7  -2    4.00    1.90
   4   7   3    0.90    1.10
   4   7   3    0.60    2.50
  -4   7  -3    2.10    0.80
  -4   7  -4    7.80    1.10
   4   7   4    7.50    1.50
   4   7   4   12.30    3.50
   4   7   5    2.80    1.60
  -4   7  -5    3.10    1.10
   4   7   5    2.20    3.10
  -4   7  -6    0.80    1.30
   4   7   6    3.70    3.10
   4   7   6    1.10    1.70
   4   7   7    1.80    2.00
   4   7   7   -2.10    3.20
   4   7   8   18.60    2.80
   4   7   8   15.80    4.50
   4   7   9    7.50    2.70
   4   7   9    5.30    4.30
   4   7  10    1.80    4.30
   4   7  10    6.50    2.90
  -4   8  10   -1.00    4.80
  -4   8  10    4.30    2.90
  -4   8   9    4.10    2.40
  -4   8   9   -3.20    4.40
  -4   8   8   10.50    2.50
  -4   8   8    3.70    4.00
  -4   8   7    0.20    3.60
  -4   8   7    3.40    2.00
  -4   8   6    5.50    1.90
  -4   8   6    5.40    3.50
  -4   8   5    0.10    1.50
  -4   8   5    1.90    3.10
  -4   8   4   42.10    5.00
  -4   8   4   34.10    3.20
  -4   8   3   95.99    5.60
  -4   8   3   91.69    6.70
  -4   8   2   56.49    5.10
   4   8  -1    0.60    2.60
  -4   8   1   -1.80    2.30
  -4   8   0    2.30    2.20
   4   8   0    0.70    2.80
   4   8   1    3.30    0.90
  -4   8  -1    7.10    2.30
   4   8   1    4.60    2.90
   4   8   2   17.40    3.60
  -4   8  -2   16.60    2.70
   4   8   2   15.10    1.50
   4   8   3    5.30    3.30
   4   8   3    1.70    1.20
  -4   8  -3    3.60    2.10
   4   8   4   13.80    1.90
   4   8   4   21.80    4.20
   4   8   5   16.30    4.00
   4   8   5   12.90    2.00
   4   8   6   -1.60    1.70
   4   8   6   -2.30    3.10
   4   8   7    5.40    2.20
   4   8   7    8.50    4.30
   4   8   8    6.50    2.50
   4   8   8    5.80    4.30
  -4   9   8    2.00    4.40
  -4   9   7    6.60    4.40
  -4   9   6    3.90    3.80
  -4   9   5    8.70    3.80
  -4   9   4   14.30    3.70
  -4   9   3   22.70    3.80
   4   9  -2    4.00    2.60
  -4   9   2    1.90    2.70
   4   9  -1    1.80    2.80
  -4   9   1    4.30    2.80
  -4   9   0    4.20    2.60
   4   9   0    3.60    3.00
   4   9   1    1.60    2.90
  -4   9  -1    3.00    2.50
  -4   9  -2    5.60    2.40
   4   9   2    7.40    3.40
   4   9   3   19.20    4.30
  -4   9  -3   28.00    3.80
  -4   9  -4   11.00    2.80
   4   9   4    9.10    3.50
   4   9   5   19.60    4.50
   4   9   6    6.00    3.90
  -4  10   5   12.10    4.30
  -4  10   4    4.60    3.60
   4  10  -3    3.50    3.20
  -4  10   3    7.20    3.50
   4  10  -2    2.70    3.10
  -4  10   2    3.00    3.00
  -4  10   1   -0.20    2.90
   4  10  -1    2.80    3.30
   4  10   0    0.40    3.20
  -4  10   0    3.50    3.00
  -4  10  -1   10.40    3.10
   4  10   1    9.60    3.80
  -4  10  -2    4.80    2.80
   4  10   2    6.00    3.80
   4  10   3    5.00    3.80
   4  10   4   -0.70    3.60
   5   0 -15    5.40    3.20
  -5   0  15    3.00    2.70
   5   0 -14    7.00    3.10
  -5   0  14    7.00    2.70
   5   0 -13    2.50    2.80
  -5   0  13    5.20    2.70
  -5   0  12   17.30    2.80
   5   0 -12   14.70    2.90
   5   0 -11   -5.80    2.20
  -5   0  11   -2.10    2.20
  -5   0  10   -3.30    2.10
   5   0 -10   -2.20    1.90
   5   0  -9   -1.20    1.80
  -5   0   9   -1.40    1.70
   5   0  -8    2.00    1.60
  -5   0   8    3.40    1.60
   5   0  -7   -0.50    1.50
  -5   0   7   -1.30    1.40
   5   0  -6    4.90    1.30
  -5   0   6    5.50    1.20
  -5   0   6    4.10    1.40
   5   0  -6    4.40    1.20
   5   0  -5    0.50    1.20
   5   0  -5   -0.20    1.00
  -5   0   5    0.30    1.20
  -5   0   5    0.20    0.90
   5   0  -4  147.59    7.20
  -5   0   4  140.29    7.30
   5   0  -4  139.59    7.30
  -5   0   4  137.29    7.20
   5   0  -3   -0.30    0.70
  -5   0   3    0.60    0.80
   5   0  -3    1.30    0.90
  -5   0   3    0.30    0.80
  -5   0   2  324.67   15.60
   5   0  -2  329.57   15.70
   5   0  -2  327.97   15.60
  -5   0   2  293.87   15.60
  -5   0   1   -0.40    0.50
   5   0  -1    0.00    0.70
  -5   0   1   -0.10    0.60
   5   0  -1    0.20    0.50
   5   0   0  153.88    7.60
   5   0   0  153.78    7.60
  -5   0   0  147.89    7.60
  -5   0   0  156.88    7.60
   5   0   1   -0.40    0.50
  -5   0  -1   -0.20    0.50
   5   0   1   -0.50    0.50
  -5   0  -1   -0.30    0.50
   5   0   1   -0.10    0.70
   5   0   2  445.26   22.20
   5   0   2  477.95   22.20
   5   0   2  439.96   22.20
  -5   0  -2  458.25   22.20
  -5   0  -2  487.25   22.20
  -5   0  -2  413.16   22.10
   5   0   3    0.70    0.80
  -5   0  -3    0.60    0.80
   5   0   3   -1.40    1.20
  -5   0  -3   -0.20    1.00
   5   0   3   -3.10    0.90
  -5   0  -3    0.40    0.80
   5   0   4  833.12   41.10
  -5   0  -4  838.72   41.00
   5   0   4  850.91   40.90
  -5   0  -4  855.51   41.00
  -5   0  -4  823.22   40.90
   5   0   4  838.72   40.90
   5   0   5   -1.10    1.10
  -5   0  -5    0.20    1.00
  -5   0  -5    1.80    1.40
   5   0   5    0.00    1.10
  -5   0  -6   91.39    5.30
  -5   0  -6   92.39    5.50
   5   0   6   97.49    5.40
   5   0   7    0.00    1.40
  -5   0  -7   -0.70    1.40
  -5   0  -8    8.20    1.80
   5   0   8    3.20    1.60
   5   0   9   -0.60    1.70
  -5   0  -9    0.10    1.70
   5   0  10   23.40    2.60
  -5   0 -10   21.60    2.60
  -5   0 -11   -0.80    1.90
   5   0  11   -2.00    1.80
  -5   0 -12   -1.90    2.10
   5   0  12   -2.20    2.00
   5   0  13   -1.50    2.20
  -5   0 -13    3.40    2.30
  -5   1  14   27.50    3.60
   5   1 -14   25.80    3.70
   5  -1 -14   22.80    3.60
  -5  -1  14   31.30    3.40
  -5   1  13   79.89    6.30
   5   1 -13   74.89    6.40
  -5  -1  13   76.79    5.80
   5  -1 -13   83.89    6.40
  -5   1  12   56.39    5.20
   5   1 -12   57.79    5.30
   5  -1 -12   56.29    5.40
  -5  -1  12   52.59    5.10
  -5   1  11   24.10    3.10
   5   1 -11   22.50    3.10
  -5  -1  11   23.10    2.90
   5  -1 -11   22.30    2.90
  -5   1  10   35.00    3.30
   5   1 -10   35.20    3.30
   5  -1 -10   35.20    3.30
  -5  -1  10   30.20    3.00
   5   1  -9    1.00    1.90
  -5   1   9   -0.70    2.00
  -5  -1   9   -2.70    1.70
   5  -1  -9   -1.50    1.70
   5   1  -8   22.20    2.40
  -5   1   8   27.80    2.60
  -5  -1   8   21.80    2.30
   5  -1  -8   19.20    2.20
   5   1  -7   98.99    5.60
  -5   1   7  101.49    5.70
  -5  -1   7   97.29    5.60
  -5  -1   7   95.89    5.40
   5  -1  -7   88.59    5.60
  -5   1   6  716.03   34.80
   5   1  -6  707.53   34.80
   5   1  -6  694.23   34.80
  -5  -1   6  754.72   34.80
  -5  -1   6  716.33   34.70
   5  -1  -6  687.13   35.20
   5  -1  -6  698.03   34.80
   5   1  -5   13.50    1.40
  -5   1   5    7.80    1.30
  -5   1   5   10.80    1.30
   5   1  -5   11.90    1.50
   5  -1  -5    8.80    1.20
  -5  -1   5   13.40    1.50
  -5  -1   5   12.30    1.30
   5  -1  -5   15.70    2.50
   5  -1  -5   10.20    1.40
   5   1  -4   64.19    3.80
  -5   1   4   72.59    3.90
   5   1  -4   59.39    3.70
  -5   1   4   66.69    3.80
   5  -1  -4   60.09    3.70
  -5  -1   4   69.39    3.60
   5  -1  -4   67.79    3.90
   5   1  -3 3421.56  155.48
   5   1  -3 3198.68  155.78
  -5   1   3 3251.37  155.68
  -5   1   3 3337.27  155.48
   5  -1  -3 3042.60  155.38
  -5  -1   3 3539.75  155.68
  -5  -1   3 2893.61  155.38
   5  -1  -3 3039.90  155.48
  -5   1   2  161.48    8.20
  -5   1   2  168.78    8.20
   5   1  -2  177.48    8.20
   5   1  -2  153.08    8.20
   5  -1  -2  165.78    8.30
  -5  -1   2  168.98    8.20
  -5  -1   2  175.78    8.20
   5  -1  -2  144.69    8.20
   5   1  -1   61.69    3.10
   5   1  -1   54.39    3.00
  -5   1   1   57.09    3.00
  -5   1   1   55.39    3.10
  -5  -1   1   61.59    3.10
   5  -1  -1   52.49    3.00
  -5  -1   1   58.59    3.00
   5  -1  -1   52.69    3.10
  -5   1   0  103.09    5.60
  -5   1   0  111.69    5.60
   5   1   0   96.79    5.70
   5   1   0  119.89    5.70
  -5  -1   0  114.19    5.70
   5  -1   0  114.59    5.70
  -5  -1   0  119.09    5.70
   5  -1   0  117.39    5.60
   5   1   1  208.98    9.40
   5   1   1  192.28    9.50
   5   1   1  160.28    9.40
  -5   1  -1  182.98    9.40
  -5   1  -1  198.28    9.40
  -5  -1  -1  161.48    9.40
  -5  -1  -1  202.28    9.40
   5  -1   1  196.18    9.40
   5  -1   1  198.48    9.40
   5   1   2  712.03   34.80
   5   1   2  703.03   35.00
  -5   1  -2  706.43   34.70
   5   1   2  743.03   34.80
  -5   1  -2  770.32   34.80
  -5   1  -2  716.13   34.80
  -5  -1  -2  702.13   34.80
  -5  -1  -2  724.53   34.80
   5  -1   2  658.63   34.70
   5   1   3   12.80    1.40
   5   1   3   18.00    2.00
  -5   1  -3   17.00    1.70
  -5   1  -3   17.70    1.60
  -5   1  -3   14.70    1.60
  -5  -1  -3   15.20    2.00
   5  -1   3   17.50    1.70
  -5  -1  -3   18.20    1.60
  -5  -1  -3   16.30    1.40
   5  -1   3   16.20    1.60
   5   1   4    9.00    1.90
  -5   1  -4   10.90    1.20
  -5   1  -4    9.10    1.30
   5   1   4    9.40    1.20
   5   1   4   11.00    1.40
  -5   1  -4   10.70    1.50
  -5  -1  -4    9.40    1.20
   5  -1   4    9.90    1.20
  -5  -1  -4    7.00    1.10
  -5  -1  -4   10.90    1.60
   5  -1   4    6.80    1.10
   5   1   5   15.00    2.30
  -5   1  -5    8.40    1.40
   5   1   5    9.20    1.40
  -5   1  -5   15.60    1.90
   5  -1   5   14.80    1.50
  -5  -1  -5   15.30    2.00
  -5  -1  -5    9.30    1.30
   5  -1   5   11.20    1.40
   5   1   6    2.50    1.40
   5   1   6    5.80    2.20
  -5   1  -6    6.20    1.70
  -5   1  -6    3.10    1.30
   5  -1   6    3.40    1.20
  -5  -1  -6    3.40    1.30
  -5  -1  -6    7.60    1.90
   5   1   7    2.00    1.60
  -5   1  -7    2.00    1.90
  -5   1  -7    1.20    1.40
  -5  -1  -7    3.00    1.50
   5  -1   7   -0.40    1.40
  -5   1  -8   -2.00    1.60
   5   1   8    0.40    1.70
  -5  -1  -8   -1.80    1.50
   5  -1   8   -1.40    1.50
   5   1   9   48.60    4.10
  -5   1  -9   48.60    4.00
  -5  -1  -9   45.40    3.90
   5  -1   9   44.60    3.80
  -5   1 -10    0.90    1.80
   5   1  10    3.70    1.90
   5  -1  10    4.40    1.80
  -5  -1 -10    2.80    1.90
   5   1  11    1.10    2.10
  -5   1 -11   -0.10    1.90
  -5  -1 -11   -0.70    1.90
   5  -1  11    0.40    1.90
  -5   1 -12    2.90    2.30
   5   1  12   -0.50    2.10
  -5  -1 -12   -0.20    2.10
   5  -1  12   -0.80    2.00
  -5   1 -13    5.30    2.50
   5   1  13    7.00    2.70
  -5  -1 -13    7.40    2.50
   5  -1  13    4.40    2.30
  -5   2  14   25.00    3.70
   5   2 -14   37.20    4.10
   5  -2 -14   28.20    3.60
  -5  -2  14   34.40    3.40
  -5   2  13   12.20    3.20
   5   2 -13   11.70    3.00
   5  -2 -13   11.30    2.80
  -5  -2  13   11.00    2.40
  -5   2  12    7.30    2.60
   5   2 -12    8.50    2.70
  -5  -2  12    8.40    2.20
   5  -2 -12    7.70    2.50
  -5   2  11    9.40    2.70
   5   2 -11    7.30    2.40
  -5  -2  11   13.50    2.30
   5  -2 -11    8.80    2.40
  -5   2  10    7.90    2.40
   5   2 -10   16.40    2.60
  -5  -2  10   12.30    2.10
   5  -2 -10   11.70    2.40
   5   2  -9   27.00    2.90
  -5   2   9   26.80    3.00
  -5  -2   9   27.80    2.70
   5  -2  -9   20.80    2.70
  -5   2   8    5.20    1.90
   5   2  -8   11.70    2.10
  -5  -2   8   13.70    1.90
   5  -2  -8    9.90    1.90
  -5  -2   8   13.50    1.70
   5   2  -7   27.50    2.80
  -5   2   7   23.10    2.40
   5  -2  -7   30.00    2.90
  -5  -2   7   29.70    2.70
  -5  -2   7   30.20    2.40
   5   2  -6   83.59    4.90
  -5   2   6   88.79    5.00
   5   2  -6   78.39    4.80
   5  -2  -6   82.79    5.00
   5  -2  -6   92.19    4.80
  -5  -2   6   85.19    4.60
  -5  -2   6   79.69    4.90
  -5   2   5  236.08   12.20
   5   2  -5  243.88   12.20
   5   2  -5  253.87   12.20
  -5   2   5  234.08   12.20
   5  -2  -5  226.38   12.60
   5  -2  -5  236.58   12.30
  -5  -2   5  253.17   12.10
  -5  -2   5  243.98   12.20
   5  -2  -5  258.87   12.20
   5   2  -4  136.69    7.00
   5   2  -4  144.69    7.00
  -5   2   4  131.99    7.00
  -5   2   4  135.49    7.00
   5  -2  -4  145.19    6.90
  -5  -2   4  123.89    6.80
   5  -2  -4  130.69    7.40
  -5  -2   4  142.49    7.00
   5  -2  -4  124.09    7.10
  -5   2   3  489.85   22.70
   5   2  -3  438.96   22.70
  -5   2   3  405.46   22.70
   5   2  -3  485.05   22.70
   5  -2  -3  480.85   22.90
   5  -2  -3  415.96   22.60
  -5  -2   3  500.45   22.60
  -5  -2   3  473.75   22.70
   5  -2  -3  484.95   22.70
  -5   2   2    2.70    0.80
   5   2  -2    2.90    0.70
  -5   2   2    4.30    0.70
   5   2  -2    4.70    0.80
   5  -2  -2    2.20    0.90
  -5  -2   2    3.30    0.60
   5  -2  -2    4.40    1.10
   5  -2  -2    4.00    0.60
  -5  -2   2    3.80    0.80
  -5   2   1    9.10    0.90
  -5   2   1    8.90    0.80
   5   2  -1    7.40    0.80
   5   2  -1    7.80    0.80
   5  -2  -1    9.10    0.80
   5  -2  -1    8.90    1.00
  -5  -2   1    8.20    0.80
  -5  -2   1    9.30    0.90
   5  -2  -1   10.20    1.00
   5   2   0    2.10    0.60
  -5   2   0    4.00    0.60
  -5   2   0    2.90    0.60
   5   2   0    3.30    0.70
  -5  -2   0    2.80    0.60
   5  -2   0    4.00    0.70
  -5  -2   0    2.90    0.60
   5  -2   0    3.20    0.50
   5   2   1   91.09    4.40
   5   2   1   85.89    4.80
  -5   2  -1   91.29    4.40
   5   2   1   77.19    4.40
  -5   2  -1   81.99    4.30
  -5  -2  -1   72.99    4.40
  -5  -2  -1   87.59    4.40
   5  -2   1   85.49    4.30
   5   2   2   65.29    3.70
  -5   2  -2   66.39    3.50
  -5   2  -2   72.49    3.70
   5   2   2   64.39    4.00
   5   2   2   69.39    3.80
  -5   2  -2   60.69    3.60
  -5  -2  -2   72.79    3.60
   5  -2   2   69.19    3.70
  -5  -2  -2   68.09    3.70
   5  -2   2   66.69    3.60
  -5   2  -3   -0.40    1.00
  -5   2  -3   -0.60    0.80
  -5   2  -3    0.00    0.70
   5   2   3   -0.80    1.00
   5   2   3   -1.20    1.50
   5   2   3   -0.10    0.70
   5  -2   3    1.40    0.80
  -5  -2  -3   -1.60    0.80
  -5  -2  -3    0.00    1.20
   5  -2   3   -0.50    0.60
  -5  -2  -3    0.20    0.70
  -5   2  -4   61.29    3.70
  -5   2  -4   66.99    3.60
   5   2   4   64.69    3.70
   5   2   4   59.39    3.80
  -5   2  -4   61.39    3.60
   5   2   4   59.29    4.10
   5  -2   4   64.89    3.60
  -5  -2  -4   64.19    3.50
   5  -2   4   54.29    3.50
  -5  -2  -4   60.09    4.00
  -5  -2  -4   61.89    3.70
   5   2   5   42.60    3.20
  -5   2  -5   42.30    3.20
  -5   2  -5   43.60    3.00
   5   2   5   43.10    3.70
  -5  -2  -5   45.50    3.10
   5  -2   5   41.10    2.70
  -5  -2  -5   44.80    2.90
   5  -2   5   43.90    3.00
  -5  -2  -5   41.20    3.30
   5   2   6    0.80    1.50
  -5   2  -6   -1.00    1.60
   5   2   6   -0.10    2.10
  -5   2  -6   -2.20    1.20
  -5  -2  -6   -0.20    1.10
   5  -2   6   -0.50    1.10
   5  -2   6   -1.20    1.00
  -5   2  -7   18.30    2.60
   5   2   7   12.10    2.10
   5   2   7   14.70    3.20
  -5  -2  -7   12.00    1.80
   5  -2   7   14.80    1.70
   5   2   8    4.80    2.00
   5   2   8    4.30    3.00
  -5  -2  -8    1.70    1.60
   5  -2   8    5.50    1.50
  -5   2  -9    3.10    1.90
   5   2   9   -0.30    2.00
  -5  -2  -9    2.50    1.70
   5  -2   9    1.60    1.50
  -5   2 -10    8.30    2.20
   5   2  10    6.40    2.30
   5  -2  10    6.90    1.80
  -5  -2 -10    4.70    1.90
   5   2  11    0.70    2.20
  -5   2 -11    0.40    2.20
   5  -2  11    1.20    1.80
  -5  -2 -11    0.40    1.90
  -5   2 -12    8.70    2.50
   5   2  12   11.20    2.80
   5  -2  12   10.60    2.20
  -5  -2 -12    6.90    2.20
   5   2  13    1.20    2.50
  -5   2 -13   -0.20    2.50
   5  -2  13    2.70    2.10
  -5  -2 -13    0.50    2.10
   5   3 -14    7.70    3.10
  -5   3  14    4.30    3.10
   5  -3 -14    6.20    2.80
  -5  -3  14    7.30    2.20
  -5   3  13    2.60    3.10
   5   3 -13   -2.00    2.60
   5  -3 -13    0.60    2.40
  -5  -3  13    0.60    1.80
  -5   3  12   19.00    3.10
   5   3 -12   27.30    3.30
  -5  -3  12   22.30    2.50
   5  -3 -12   21.00    3.00
   5   3 -11    5.50    2.40
  -5   3  11    5.30    2.50
  -5  -3  11    3.70    1.70
   5  -3 -11    2.80    2.10
   5   3 -10   -0.70    2.10
  -5   3  10    1.00    2.20
  -5  -3  10    1.20    1.60
   5  -3 -10    2.00    2.00
  -5   3   9   25.50    3.00
   5   3  -9   22.80    2.80
  -5  -3   9   27.60    2.70
  -5  -3   9   23.50    2.40
   5  -3  -9   30.60    2.80
  -5   3   8   12.60    2.30
   5   3  -8   15.50    2.20
  -5  -3   8   23.00    1.80
  -5  -3   8   17.40    2.00
   5  -3  -8   17.20    2.10
   5   3  -7    1.90    1.40
  -5   3   7    1.40    1.60
   5  -3  -7   -1.00    1.40
  -5  -3   7    0.30    0.90
  -5  -3   7   -0.70    1.20
   5  -3  -7   -1.50    1.10
   5   3  -6    6.20    1.60
   5   3  -6    5.90    1.40
  -5   3   6    5.50    1.50
  -5  -3   6    7.70    1.30
   5  -3  -6    7.40    1.50
   5  -3  -6    7.10    1.20
  -5  -3   6    7.40    1.00
   5   3  -5   87.69    4.90
  -5   3   5   90.49    5.00
   5   3  -5   91.49    4.90
  -5   3   5   88.49    5.00
   5  -3  -5   86.49    4.80
  -5  -3   5   88.39    4.60
  -5  -3   5   87.69    4.80
   5  -3  -5   84.39    4.90
   5  -3  -5   90.29    5.40
  -5   3   4  860.91   40.30
   5   3  -4  800.82   40.20
   5   3  -4  858.41   40.20
  -5   3   4  742.73   40.30
  -5   3   4  832.92   40.70
  -5  -3   4  834.62   40.10
  -5  -3   4  844.22   40.20
   5  -3  -4  871.81   40.20
   5  -3  -4  798.52   40.30
   5  -3  -4  825.22   40.60
  -5   3   3   71.09    4.30
   5   3  -3   67.69    3.60
  -5   3   3   66.59    3.70
  -5   3   3   66.49    3.80
   5   3  -3   72.49    3.60
  -5  -3   3   61.09    3.60
   5  -3  -3   66.19    3.50
   5  -3  -3   65.09    4.00
  -5  -3   3   61.69    3.40
   5  -3  -3   61.29    3.70
   5   3  -2   14.60    1.30
  -5   3   2   16.60    1.90
   5   3  -2   14.40    1.40
  -5   3   2   12.10    1.20
  -5   3   2   14.00    1.40
   5  -3  -2   13.90    1.60
  -5  -3   2   14.50    1.40
   5  -3  -2   17.40    1.20
  -5  -3   2   16.60    1.10
   5  -3  -2   13.70    1.20
   5   3  -1  601.04   31.10
  -5   3   1  643.04   31.30
  -5   3   1  661.83   31.10
   5   3  -1  655.33   31.10
  -5   3   1  659.03   31.10
   5  -3  -1  641.74   31.00
   5  -3  -1  661.43   31.10
   5  -3  -1  618.94   31.20
  -5  -3   1  617.64   31.10
  -5  -3   1  640.44   31.10
   5   3   0   47.50    2.60
  -5   3   0   44.70    2.50
   5   3   0   48.10    2.70
  -5   3   0   47.90    2.60
  -5   3   0   46.00    2.70
   5  -3   0   45.60    2.60
  -5  -3   0   46.50    2.60
  -5  -3   0   44.90    2.60
  -5   3  -1  735.63   35.70
   5   3   1  781.62   35.80
   5   3   1  794.92   35.80
   5   3   1  721.43   36.20
  -5   3  -1  738.33   35.70
  -5   3  -1  728.03   35.70
   5  -3   1  688.33   35.70
  -5  -3  -1  679.23   35.70
  -5  -3  -1  700.73   35.70
   5  -3   1  787.92   35.70
   5   3   2   14.80    1.40
   5   3   2   21.80    2.30
  -5   3  -2   16.50    1.30
   5   3   2   16.70    1.50
  -5   3  -2   14.80    1.50
   5  -3   2   17.20    1.50
   5  -3   2   14.10    1.30
  -5  -3  -2   15.20    1.40
  -5  -3  -2   17.10    1.60
  -5   3  -3    1.80    0.70
   5   3   3    0.90    0.80
  -5   3  -3    1.50    0.80
   5   3   3    0.30    0.90
   5   3   3    0.30    1.60
  -5  -3  -3    2.40    0.90
   5  -3   3    0.50    0.70
   5  -3   3    1.20    0.60
  -5  -3  -3    1.80    0.70
   5   3   4    0.00    1.90
  -5   3  -4    0.30    0.90
  -5   3  -4   -1.50    0.70
   5   3   4    0.00    1.10
   5  -3   4    0.20    0.70
   5  -3   4    0.40    0.80
  -5  -3  -4    0.60    1.00
  -5  -3  -4    0.00    0.80
   5   3   5   11.40    2.60
   5   3   5    6.40    1.50
  -5   3  -5    7.70    1.30
   5  -3   5    6.60    1.00
  -5  -3  -5   11.00    1.50
   5  -3   5    9.40    1.20
  -5  -3  -5    6.40    1.10
   5   3   6   64.09    5.40
  -5   3  -6   66.49    4.60
   5   3   6   71.29    4.60
   5  -3   6   60.99    3.90
   5  -3   6   68.69    4.10
  -5  -3  -6   66.09    4.20
   5   3   7   12.40    3.30
  -5   3  -7   17.50    2.80
   5   3   7   10.40    2.10
   5  -3   7   13.70    1.80
  -5  -3  -7   11.40    1.70
   5  -3   7   13.30    1.60
   5   3   8    2.60    2.00
   5   3   8    0.00    3.10
  -5  -3  -8    0.60    1.40
   5  -3   8    0.90    1.30
   5   3   9   32.60    3.20
   5   3   9   32.90    4.70
  -5  -3  -9   22.60    2.50
   5  -3   9   33.20    3.00
   5   3  10    5.50    2.40
  -5   3 -10    5.70    2.10
  -5  -3 -10    2.30    1.80
   5  -3  10    2.90    1.50
   5   3  11    7.20    2.50
  -5   3 -11   11.30    2.50
  -5  -3 -11    7.30    2.10
   5  -3  11    7.50    1.80
   5   3  12   16.50    3.00
  -5   3 -12   13.80    2.80
  -5  -3 -12   11.90    2.50
   5  -3  12   14.90    2.20
  -5   4  13   -1.70    3.00
   5   4 -13    1.20    2.80
  -5  -4  13    0.10    1.60
   5  -4 -13   -1.30    2.30
   5   4 -12   -0.40    2.50
  -5   4  12    1.10    2.70
  -5  -4  12    2.20    1.50
   5  -4 -12   -1.30    2.10
   5   4 -11    3.90    2.30
  -5   4  11    2.10    2.50
  -5  -4  11    0.10    1.40
   5  -4 -11   -1.10    1.90
   5   4 -10   39.50    4.30
  -5   4  10   44.60    4.60
   5  -4 -10   44.60    4.10
  -5  -4  10   50.19    3.50
   5   4  -9    5.80    2.10
  -5   4   9    7.40    2.40
  -5  -4   9    8.60    1.20
  -5  -4   9    7.20    1.50
   5  -4  -9    8.50    1.90
  -5   4   8    1.90    2.00
   5   4  -8    5.00    1.90
   5  -4  -8    6.90    1.70
  -5  -4   8    5.20    1.30
  -5  -4   8    8.90    1.10
   5   4  -7    5.40    1.50
  -5   4   7   -0.80    1.60
   5  -4  -7    2.00    1.20
  -5  -4   7    4.10    0.80
  -5  -4   7    2.90    1.10
   5  -4  -7    5.50    1.50
  -5   4   6    4.20    2.60
  -5   4   6    2.40    1.40
   5   4  -6    3.40    1.30
   5  -4  -6    2.20    1.00
  -5  -4   6    2.00    0.60
  -5  -4   6    2.90    0.90
   5  -4  -6    0.00    1.20
  -5   4   5   48.00    3.40
  -5   4   5   50.19    4.30
   5   4  -5   47.70    3.10
   5   4  -5   51.39    3.20
   5  -4  -5   46.90    2.90
   5  -4  -5   49.70    3.20
  -5  -4   5   51.99    2.60
  -5  -4   5   47.20    2.80
   5   4  -4   63.99    3.50
   5   4  -4   65.49    3.60
  -5   4   4   61.59    3.70
  -5   4   4   63.19    4.50
  -5   4   4   60.29    3.70
   5  -4  -4   61.79    4.00
   5  -4  -4   59.79    3.50
  -5  -4   4   59.39    3.10
   5  -4  -4   65.99    3.30
  -5  -4   4   61.29    3.20
  -5   4   3    7.80    1.10
   5   4  -3    9.60    1.00
  -5   4   3   10.40    2.00
  -5   4   3   10.80    1.20
   5   4  -3   10.30    1.00
   5  -4  -3    9.80    0.90
   5  -4  -3    8.60    1.50
   5  -4  -3    8.10    0.90
  -5   4   2    4.00    1.60
   5   4  -2    8.20    0.90
  -5   4   2    6.70    0.90
   5   4  -2    7.20    0.80
  -5   4   2    7.00    0.90
   5  -4  -2    9.20    1.30
   5  -4  -2    6.80    0.70
   5  -4  -2    6.50    0.60
   5   4  -1    3.80    0.60
   5   4  -1    6.50    0.70
  -5   4   1    5.70    1.40
  -5   4   1    5.10    0.70
  -5   4   1    5.60    0.80
  -5   4   0  117.29    5.70
   5   4   0  117.79    5.80
   5   4   0  114.79    5.80
  -5   4   0  109.89    5.70
  -5   4   0  108.39    6.00
  -5  -4   0  111.79    5.70
  -5  -4   0  116.99    5.70
   5   4   1  196.28    9.60
   5   4   1  189.88   10.30
  -5   4  -1  192.38    9.60
   5   4   1  192.38    9.70
  -5   4  -1  201.78    9.60
  -5   4  -1  192.78    9.70
  -5  -4  -1  192.58    9.60
  -5  -4  -1  188.88    9.50
   5   4   2   17.10    2.40
  -5   4  -2   17.60    1.30
  -5   4  -2   17.90    1.50
   5   4   2   19.50    1.60
   5   4   2   12.20    1.40
  -5  -4  -2   16.80    1.30
  -5  -4  -2   18.80    1.60
   5   4   3   -1.20    1.30
  -5   4  -3    0.60    0.80
   5   4   3    0.70    1.00
  -5   4  -3    0.80    0.60
   5   4   3   -1.80    1.80
   5  -4   3    1.30    0.50
  -5  -4  -3    0.80    0.90
   5  -4   3    1.00    0.50
  -5  -4  -3    1.50    0.60
   5   4   4   86.99    5.00
  -5   4  -4   86.09    4.70
  -5   4  -4   84.69    4.60
   5   4   4   79.59    5.70
   5  -4   4   83.39    4.40
  -5  -4  -4   88.19    4.80
   5  -4   4   84.29    4.40
  -5  -4  -4   85.59    4.60
  -5   4  -5  500.95   24.30
   5   4   5  467.45   25.10
   5   4   5  526.85   24.50
  -5  -4  -5  490.75   24.20
   5  -4   5  474.75   24.10
  -5  -4  -5  484.95   24.40
   5  -4   5  508.65   24.10
   5   4   6  214.18   11.60
   5   4   6  214.48   12.40
  -5  -4  -6  225.38   11.20
   5  -4   6  214.18   11.00
   5  -4   6  224.78   11.10
   5   4   7   15.60    2.40
   5   4   7   29.40    4.20
  -5  -4  -7   22.60    2.10
   5  -4   7   21.10    1.90
   5  -4   7   18.80    1.70
   5   4   8   10.20    2.40
   5   4   8   13.10    3.50
   5  -4   8   12.30    1.50
  -5  -4  -8    9.10    1.70
   5   4   9    1.30    2.30
   5   4   9   -0.30    3.30
  -5  -4  -9    1.10    1.50
   5  -4   9    1.90    1.20
   5   4  10    8.20    2.60
   5   4  10    4.40    3.90
  -5   4 -10   12.30    2.30
  -5  -4 -10    6.10    1.90
   5  -4  10    7.80    1.50
  -5   4 -11    6.50    2.40
   5   4  11    1.50    2.60
   5  -4  11    2.50    1.60
  -5  -4 -11    3.30    2.00
   5   4  12    3.30    2.70
  -5   4 -12    1.00    2.50
  -5  -4 -12   -0.50    2.00
   5  -4  12   -1.60    1.60
  -5   5  13    3.30    3.20
   5   5 -13    5.10    2.90
   5  -5 -13   -2.70    2.20
   5   5 -12   13.80    3.00
  -5   5  12   16.20    3.20
   5  -5 -12   13.70    2.40
  -5   5  11   31.20    3.70
   5   5 -11   33.80    3.40
   5  -5 -11   27.50    2.80
  -5  -5  11   35.00    2.60
  -5   5  10    2.10    2.50
   5   5 -10   -2.00    2.10
   5  -5 -10   -2.30    1.70
  -5  -5  10    1.00    1.00
  -5   5   9    2.20    2.20
   5   5  -9    1.80    2.00
   5  -5  -9    1.70    1.60
  -5  -5   9    2.70    0.90
   5   5  -8   -2.60    1.60
  -5   5   8   -2.40    1.90
  -5  -5   8   -0.50    0.60
  -5  -5   8    0.00    0.70
   5  -5  -8   -1.80    1.40
   5  -5  -8   -2.20    1.10
  -5   5   7   -0.70    2.80
  -5   5   7   -1.20    1.70
   5   5  -7    0.40    1.40
  -5  -5   7   -0.40    0.30
   5  -5  -7   -2.90    1.10
  -5  -5   7    0.20    0.50
   5  -5  -7   -1.40    0.90
  -5   5   6   15.60    2.00
  -5   5   6   16.40    3.30
   5   5  -6   21.40    1.90
   5  -5  -6   19.40    1.70
   5  -5  -6   14.80    1.50
  -5   5   5   14.20    1.70
   5   5  -5   13.90    1.40
  -5   5   5   14.70    2.90
   5   5  -5   11.70    1.40
   5  -5  -5   11.40    1.00
   5  -5  -5    8.80    1.20
  -5   5   4   60.49    3.80
  -5   5   4   60.59    3.80
   5   5  -4   64.99    3.60
  -5   5   4   62.69    4.80
   5   5  -4   65.19    3.60
   5  -5  -4   62.99    3.20
   5   5  -3   56.59    3.10
   5   5  -3   56.49    3.20
  -5   5   3   52.69    3.30
  -5   5   3   59.29    3.40
  -5   5   3   59.49    4.40
   5  -5  -3   54.39    3.80
  -5   5   2   11.00    1.20
   5   5  -2   13.70    1.10
  -5   5   2   13.70    1.40
   5   5  -2   12.00    1.20
  -5   5   2   13.10    2.10
  -5   5   1   22.30    2.40
   5   5  -1   20.40    1.50
  -5   5   1   18.80    1.40
  -5   5   1   18.20    1.60
   5   5  -1   22.30    1.50
   5   5   0   76.39    4.00
  -5   5   0   76.39    4.40
  -5   5   0   74.99    3.90
  -5   5   0   74.09    3.90
   5   5   0   72.09    3.90
   5   5   1   43.20    2.60
  -5   5  -1   43.20    2.50
   5   5   1   43.90    3.80
  -5   5  -1   45.80    2.50
   5   5   1   42.70    2.70
  -5   5  -1   43.80    3.00
  -5   5  -2    1.10    0.70
   5   5   2    1.20    0.70
   5   5   2    0.90    0.90
  -5   5  -2    1.00    0.60
   5   5   2    0.00    1.90
  -5  -5  -2    1.40    0.50
  -5  -5  -2    1.30    0.60
  -5   5  -3   54.99    3.20
   5   5   3   52.79    4.30
   5   5   3   54.99    3.60
  -5   5  -3   54.19    3.10
  -5  -5  -3   56.19    3.00
  -5  -5  -3   56.79    3.20
   5   5   4    7.00    2.60
   5   5   4    7.20    1.50
  -5   5  -4    6.70    1.20
  -5  -5  -4    9.30    1.00
  -5  -5  -4    8.50    1.20
   5   5   5  254.07   14.30
   5   5   5  277.97   13.50
  -5   5  -5  262.47   13.20
  -5  -5  -5  265.87   13.10
  -5  -5  -5  251.57   13.20
   5   5   6   52.99    5.30
   5   5   6   50.79    4.40
  -5   5  -6   54.39    3.70
   5  -5   6   47.80    2.80
   5  -5   6   50.69    2.70
  -5  -5  -6   53.79    3.30
  -5  -5  -6   52.49    3.60
   5   5   7   80.99    5.60
   5   5   7   82.49    6.70
  -5  -5  -7   82.19    4.70
   5  -5   7   76.49    4.20
   5   5   8    5.40    2.30
   5   5   8    6.00    3.50
   5  -5   8    5.80    1.00
  -5  -5  -8    4.80    1.50
   5   5   9    1.30    3.60
  -5   5  -9   -0.10    1.80
   5   5   9    0.90    2.40
   5  -5   9    1.70    1.00
  -5  -5  -9    1.30    1.50
   5   5  10   -2.20    3.60
  -5   5 -10   -0.50    2.00
   5   5  10    3.10    2.60
  -5  -5 -10    0.10    1.70
   5   5  11   -6.90    4.20
  -5   5 -11    1.10    2.30
   5   5  11    3.00    2.80
  -5  -5 -11   -2.10    1.80
  -5   6  12   11.90    3.20
   5   6 -12    6.70    2.70
   5  -6 -12    4.50    1.80
   5   6 -11   10.60    2.60
  -5   6  11    8.10    2.90
   5  -6 -11    5.50    1.70
   5   6 -10    6.00    2.30
  -5   6  10    5.50    2.60
   5   6  -9    4.60    2.00
  -5   6   9    3.00    2.30
   5   6  -8    0.90    1.70
  -5   6   8    1.00    2.00
  -5   6   8    0.60    3.50
  -5   6   7   -0.50    3.10
  -5   6   7   -0.70    1.80
   5   6  -7   -1.30    1.40
   5  -6  -7   -0.90    0.80
  -5   6   6   -0.20    3.00
  -5   6   6    2.00    1.60
   5   6  -6   -0.70    1.30
   5  -6  -6    0.00    0.50
   5  -6  -6    1.00    0.60
  -5   6   5   -0.70    1.40
   5   6  -5    1.40    1.10
  -5   6   5    1.60    2.70
   5   6  -4   18.00    1.50
  -5   6   4   18.40    3.10
  -5   6   4   18.40    1.80
   5   6  -4   17.90    1.50
   5   6  -3   20.20    1.80
  -5   6   3   24.80    2.10
  -5   6   3   16.20    1.60
   5   6  -3   20.60    1.70
  -5   6   3   16.70    2.90
  -5   6   2  276.97   14.80
   5   6  -2  293.07   14.00
   5   6  -2  282.27   14.00
  -5   6   2  274.17   14.00
  -5   6   2  291.47   14.10
   5   6  -1   27.90    1.90
  -5   6   1   31.40    3.20
  -5   6   1   31.00    2.00
   5   6  -1   30.00    2.00
  -5   6   1   29.40    2.10
   5   6   0   14.70    1.50
  -5   6   0   18.00    2.30
  -5   6   0   14.30    1.30
   5   6   0   19.90    2.90
   5   6   0   14.90    1.40
  -5   6   0   15.60    1.40
   5   6   1   72.49    3.90
  -5   6  -1   74.19    3.80
   5   6   1   75.59    4.00
   5   6   1   70.69    5.10
  -5   6  -1   75.29    4.60
  -5   6  -1   68.69    3.80
  -5   6  -2    3.00    1.60
  -5   6  -2    2.70    0.60
   5   6   2    3.20    2.40
   5   6   2    1.30    1.00
  -5   6  -2    0.70    0.70
   5   6   3    1.60    2.30
  -5   6  -3   -0.50    0.60
   5   6   3   -0.40    1.10
  -5   6  -3    0.20    0.80
  -5   6  -4    1.20    1.00
   5   6   4    2.00    2.80
   5   6   4    1.80    1.40
  -5  -6  -4    3.60    0.70
  -5  -6  -4    4.40    0.80
  -5   6  -5   22.80    2.40
   5   6   5   19.10    2.30
   5   6   5   25.60    4.10
  -5  -6  -5   22.40    1.80
   5   6   6    1.20    1.80
  -5   6  -6    4.60    1.40
   5   6   6    5.20    3.10
  -5  -6  -6    5.70    1.00
   5   6   7   17.40    3.90
  -5   6  -7   11.20    1.80
   5   6   7    9.90    2.20
  -5  -6  -7   10.20    1.30
   5   6   8   20.90    2.90
  -5   6  -8   17.80    2.20
   5   6   8   23.80    4.30
  -5  -6  -8   14.90    1.80
   5   6   9   11.20    4.20
   5   6   9    6.30    2.60
  -5   6  -9    3.90    2.00
  -5  -6  -9    4.60    1.50
  -5   6 -10    2.70    2.20
   5   6  10   -2.40    4.10
   5   6  10   10.20    3.00
  -5  -6 -10    5.40    1.70
  -5   7  11    0.90    2.80
  -5   7  10    1.70    2.70
  -5   7   9   -7.60    3.70
  -5   7   9    1.70    2.30
   5   7  -9    2.80    2.30
  -5   7   8   -4.50    3.50
  -5   7   8    0.40    2.00
   5   7  -8   -1.60    1.60
  -5   7   7   16.30    2.30
  -5   7   7   11.80    3.90
   5   7  -7   12.50    1.90
  -5   7   6    8.20    3.40
   5   7  -6   10.10    1.60
  -5   7   6    6.10    1.80
  -5   7   5   10.20    3.20
   5   7  -5    8.40    1.40
  -5   7   5    4.50    1.60
  -5   7   4   15.30    1.70
  -5   7   4   12.20    3.10
   5   7  -4   15.50    1.50
   5   7  -4   15.80    1.40
   5   7  -3   -0.30    0.70
   5   7  -3   -1.50    0.70
  -5   7   3    0.30    1.10
  -5   7   3    1.40    2.40
  -5   7   2   95.89    6.40
  -5   7   2   98.49    5.20
   5   7  -2   94.79    5.00
  -5   7   2   94.19    5.20
   5   7  -2  102.29    5.10
   5   7  -1    6.90    0.80
  -5   7   1    4.40    0.90
  -5   7   1    7.20    2.40
   5   7  -1    5.60    0.80
  -5   7   1    5.20    0.90
   5   7   0   60.39    4.90
  -5   7   0   65.79    4.60
   5   7   0   63.89    3.40
  -5   7   0   58.69    3.30
  -5   7   0   58.39    3.30
   5   7   0   59.49    3.40
  -5   7  -1   14.30    1.30
  -5   7  -1   16.30    1.40
   5   7   1   22.90    3.30
  -5   7  -1   21.20    2.60
   5   7   1   13.50    1.30
  -5   7  -2   20.50    1.80
   5   7   2   29.90    3.90
  -5   7  -2   23.00    2.80
  -5   7  -2   22.10    1.70
   5   7   2   22.10    2.20
  -5   7  -3   84.69    5.30
   5   7   3   88.19    5.00
  -5   7  -3   83.39    4.60
   5   7   3   88.69    6.60
   5   7   4   -0.60    2.80
  -5   7  -4    1.20    0.90
   5   7   4    1.00    1.40
   5   7   5   10.80    3.20
  -5   7  -5    5.80    1.20
   5   7   5    2.30    1.60
   5   7   6    0.60    1.80
   5   7   6    4.20    3.20
  -5   7  -6    0.20    1.20
  -5   7  -7    0.70    2.50
   5   7   7    0.50    3.10
   5   7   7    1.70    2.10
   5   7   8   23.90    3.10
   5   7   8   28.60    5.20
   5   7   9    1.40    2.60
   5   7   9    3.80    4.20
  -5   8  10    0.60    2.70
  -5   8   9   -6.60    4.00
  -5   8   9    9.70    2.60
  -5   8   8    1.70    4.10
  -5   8   8    3.90    2.20
  -5   8   7    2.20    2.00
  -5   8   7   -0.10    3.60
  -5   8   6    7.90    3.50
  -5   8   6    9.50    2.00
  -5   8   5    0.50    3.10
  -5   8   5    2.80    1.60
  -5   8   4    5.90    3.10
  -5   8   4    3.20    1.50
  -5   8   3   17.30    2.20
  -5   8   3   32.70    4.30
  -5   8   2    2.50    2.50
   5   8  -1   17.30    3.20
  -5   8   1   21.10    3.10
   5   8   0    3.20    2.60
   5   8   0    1.40    1.00
  -5   8   0    5.60    2.30
   5   8   1    0.70    0.80
   5   8   1   -0.40    2.40
  -5   8  -1    2.50    2.10
  -5   8  -2    7.20    2.10
   5   8   2    2.60    1.00
   5   8   2    5.00    2.80
   5   8   3    3.60    1.30
   5   8   3    3.60    3.00
  -5   8  -3    5.20    2.10
   5   8   4    2.70    1.40
   5   8   4    8.80    3.40
  -5   8  -4    8.20    2.20
   5   8   5   16.20    2.10
   5   8   5   17.10    4.10
   5   8   6    6.50    3.70
   5   8   6    1.40    1.90
   5   8   7    1.30    2.10
   5   8   7    2.20    3.80
   5   8   8    8.60    4.30
   5   8   8    6.10    2.50
  -5   9   8    3.40    4.50
  -5   9   7    4.00    4.10
  -5   9   6    5.80    4.00
  -5   9   5   10.80    3.90
  -5   9   4    4.30    3.20
  -5   9   3    0.80    2.90
  -5   9   2   -2.10    2.50
   5   9  -2    2.90    3.10
   5   9  -1    5.30    3.10
  -5   9   1    0.00    2.40
   5   9   0    4.90    3.00
  -5   9   0    6.10    2.70
   5   9   1   10.60    3.50
  -5   9  -1   13.70    2.80
  -5   9  -2   10.20    2.60
   5   9   2   11.50    3.70
   5   9   3    4.90    3.20
  -5   9  -3    4.10    2.40
   5   9   4    4.20    3.70
   5   9   5    3.80    3.60
   5   9   6    2.90    3.50
  -5  10   5   13.70    4.30
  -5  10   4    7.10    3.60
   5  10  -3    4.00    3.30
  -5  10   3    8.30    3.50
   5  10  -2    1.20    3.30
  -5  10   2    0.10    2.90
   5  10  -1    5.50    3.30
  -5  10   1    1.80    2.80
  -5  10   0    4.80    2.90
   5  10   0    4.30    3.20
   5  10   1    8.30    3.70
   5  10   2    5.50    3.80
   5  10   3    8.60    4.00
   6   0 -15   -0.40    3.00
  -6   0  15   -0.40    2.70
   6   0 -14    7.50    3.10
  -6   0  14   11.20    2.90
   6   0 -13   -0.50    2.70
  -6   0  13    3.00    2.60
  -6   0  12    4.90    2.50
   6   0 -12    0.70    2.60
   6   0 -11   -1.10    2.30
  -6   0  11   -2.50    2.10
   6   0 -10    5.30    2.30
  -6   0  10    3.50    2.30
   6   0  -9   -0.60    1.90
  -6   0   9   -1.90    1.80
  -6   0   8  246.98   12.90
   6   0  -8  251.67   12.90
   6   0  -7   -0.30    1.50
  -6   0   7    1.70    1.40
  -6   0   6  381.66   18.00
   6   0  -6  324.87   17.80
  -6   0   6  365.96   17.90
   6   0  -6  369.46   18.00
  -6   0   5    1.90    1.00
   6   0  -5    1.30    1.20
  -6   0   5   -0.30    1.00
   6   0  -5   -0.90    1.00
   6   0  -4  703.73   33.80
  -6   0   4  682.53   33.80
  -6   0   4  714.03   33.80
   6   0  -4  672.23   33.80
  -6   0   3   -0.40    0.80
  -6   0   3   -0.60    0.80
   6   0  -3   -0.80    0.80
   6   0  -3    0.60    0.90
   6   0  -2  475.55   24.10
  -6   0   2  496.55   24.10
  -6   0   2  527.55   24.10
   6   0  -2  476.55   24.10
  -6   0   1   -1.00    0.60
   6   0  -1   -0.30    0.60
   6   0  -1   -0.10    0.70
  -6   0   1   -0.50    0.60
  -6   0   0    0.10    0.60
   6   0   0    0.30    0.50
  -6   0   0    0.90    0.60
   6   0   0    1.10    0.70
  -6   0  -1    0.70    0.60
   6   0   1    0.10    0.70
   6   0   1    0.00    0.60
   6   0   1   -0.70    0.70
  -6   0  -1   -0.20    0.60
   6   0   2   43.60    2.50
  -6   0  -2   39.20    2.60
   6   0   2   43.60    2.60
   6   0   2   41.00    2.70
  -6   0  -2   42.80    2.60
  -6   0  -3    0.60    0.80
  -6   0  -3    1.90    0.90
  -6   0  -3   -0.50    0.90
   6   0   3   -0.30    1.20
   6   0   3    0.90    0.90
   6   0   4   20.70    2.10
  -6   0  -4   23.70    2.10
  -6   0  -4   21.50    2.00
   6   0   4   23.50    2.40
  -6   0  -4   23.30    2.10
   6   0   4   24.10    2.10
  -6   0  -5    0.60    1.30
   6   0   5   -0.20    1.10
  -6   0  -5    0.00    1.10
  -6   0  -6   31.30    2.80
   6   0   6   30.10    2.80
  -6   0  -6   30.70    2.70
  -6   0  -7    0.60    1.40
   6   0   7   -1.30    1.40
  -6   0  -8   80.69    5.00
   6   0   8   72.39    5.10
   6   0   9   -1.30    1.60
  -6   0  -9   -1.00    1.80
  -6   0 -10   -0.20    1.80
   6   0  10   -1.60    1.80
   6   0  11    1.00    2.00
  -6   0 -11   -1.60    2.00
  -6   0 -12   -0.40    2.20
   6   0  12    2.00    2.20
  -6   1  14   21.60    3.50
   6   1 -14   19.20    3.60
   6  -1 -14   18.10    3.40
  -6  -1  14   22.30    3.10
  -6   1  13   10.20    2.90
   6   1 -13   10.60    2.90
   6  -1 -13   10.50    2.90
  -6  -1  13   12.20    2.80
  -6   1  12   15.80    2.80
   6   1 -12   22.00    3.10
   6  -1 -12   15.20    2.90
  -6  -1  12   19.50    2.80
   6   1 -11   91.09    6.30
  -6   1  11   90.49    6.40
   6  -1 -11   98.59    6.30
  -6  -1  11   86.99    6.30
  -6   1  10    2.00    2.30
   6   1 -10    1.70    2.20
  -6  -1  10    0.60    2.00
   6  -1 -10   -1.50    1.90
  -6   1   9   47.60    4.10
   6   1  -9   43.60    4.10
  -6  -1   9   42.60    3.80
   6  -1  -9   40.00    3.90
  -6   1   8    6.40    1.90
   6   1  -8    6.10    1.80
   6  -1  -8    6.40    1.90
  -6  -1   8    6.10    1.80
  -6   1   7   86.59    5.40
   6   1  -7   89.39    5.40
  -6  -1   7   90.79    5.40
  -6  -1   7   96.89    5.20
   6  -1  -7   90.79    5.40
  -6   1   6   -0.90    1.40
  -6   1   6   -0.10    1.40
   6   1  -6   -0.90    1.20
   6   1  -6   -0.60    1.30
   6  -1  -6   -1.30    1.30
  -6  -1   6   -1.10    1.00
   6  -1  -6    0.30    1.00
  -6  -1   6   -1.00    1.20
   6  -1  -6    0.20    2.00
   6   1  -5    1.10    1.10
  -6   1   5    1.30    1.10
   6   1  -5    1.90    1.30
  -6   1   5   -0.60    1.10
   6  -1  -5   -0.30    1.00
  -6  -1   5   -0.50    1.10
   6  -1  -5   -0.30    1.20
  -6  -1   5    0.90    0.90
  -6   1   4  378.56   20.30
   6   1  -4  430.96   20.30
   6   1  -4  405.46   20.30
  -6   1   4  418.36   20.30
   6  -1  -4  419.16   20.30
  -6  -1   4  422.26   20.30
   6  -1  -4  403.16   20.30
  -6  -1   4  423.66   20.20
   6   1  -3  217.38   11.00
  -6   1   3  219.48   11.00
  -6   1   3  229.08   11.00
   6   1  -3  232.98   11.00
   6  -1  -3  196.88   11.00
   6  -1  -3  230.68   11.10
  -6  -1   3  207.78   10.90
  -6  -1   3  234.88   11.00
  -6   1   2  459.65   21.20
   6   1  -2  471.15   21.20
  -6   1   2  409.96   21.20
   6   1  -2  413.96   21.20
   6  -1  -2  423.46   21.20
   6  -1  -2  442.86   21.20
  -6  -1   2  379.06   21.10
  -6  -1   2  468.55   21.20
   6   1  -1  228.58   11.20
   6   1  -1  249.68   11.20
  -6   1   1  230.18   11.20
  -6   1   1  210.78   11.20
  -6  -1   1  239.48   11.20
   6  -1  -1  229.28   11.20
  -6  -1   1  221.48   11.20
   6  -1  -1  205.38   11.20
  -6   1   0  352.36   16.30
  -6   1   0  337.17   16.30
   6   1   0  328.37   16.30
  -6  -1   0  321.27   16.30
  -6  -1   0  348.57   16.30
   6  -1   0  332.97   16.30
   6  -1   0  311.77   16.30
   6   1   1   -0.30    0.60
   6   1   1   -0.30    0.90
   6   1   1    0.60    0.70
  -6   1  -1    0.20    0.60
  -6   1  -1    0.90    0.60
   6  -1   1    1.30    0.50
  -6  -1  -1    0.40    0.60
   6  -1   1    0.20    0.60
   6  -1   1    0.60    0.70
  -6  -1  -1    0.50    0.60
   6   1   2    8.10    0.90
   6   1   2    5.70    1.00
  -6   1  -2    8.50    1.00
   6   1   2    9.80    1.50
  -6   1  -2    6.80    1.00
   6  -1   2    9.20    1.00
  -6  -1  -2    8.80    1.00
   6  -1   2    8.40    1.00
  -6  -1  -2   10.50    1.10
  -6   1  -3  452.45   21.50
  -6   1  -3  444.06   21.40
  -6   1  -3  479.55   21.50
   6   1   3  368.26   21.50
   6   1   3  444.36   21.70
   6   1   3  459.05   21.50
   6  -1   3  415.16   21.50
  -6  -1  -3  386.56   21.50
  -6  -1  -3  438.76   21.60
  -6  -1  -3  468.45   21.60
   6  -1   3  459.95   21.50
  -6   1  -4  151.88    7.50
   6   1   4  143.49    7.40
   6   1   4  146.99    7.60
  -6   1  -4  143.59    7.30
  -6   1  -4  141.69    7.30
   6   1   4  139.49    7.70
   6  -1   4  121.39    7.20
  -6  -1  -4  125.29    7.30
   6  -1   4  141.69    7.30
  -6  -1  -4  146.89    7.50
  -6  -1  -4  138.29    7.30
  -6   1  -5   10.20    1.60
  -6   1  -5    7.50    1.40
   6   1   5    6.10    1.40
   6   1   5    9.40    2.10
  -6  -1  -5    8.10    1.70
  -6  -1  -5    6.90    1.20
   6  -1   5   10.30    1.40
   6  -1   5    6.00    1.10
  -6   1  -6    5.10    1.40
   6   1   6    1.70    2.10
   6   1   6    2.80    1.50
  -6   1  -6    6.90    1.70
  -6  -1  -6    2.70    1.30
  -6  -1  -6    3.50    2.00
   6  -1   6    3.00    1.20
  -6   1  -7   13.10    2.20
  -6   1  -7    7.60    1.70
   6   1   7    5.70    1.70
  -6  -1  -7    5.90    1.60
   6  -1   7    6.40    1.60
   6   1   8   -1.20    1.60
  -6   1  -8   -0.30    1.70
  -6  -1  -8    0.10    1.60
   6  -1   8   -0.10    1.50
   6   1   9   -0.90    1.70
  -6   1  -9   -0.80    1.70
  -6  -1  -9   -0.50    1.60
   6  -1   9    1.20    1.60
  -6   1 -10    6.80    2.10
   6   1  10    2.90    2.10
   6  -1  10    3.00    1.80
  -6  -1 -10    2.00    1.80
  -6   1 -11    0.70    2.10
   6   1  11   -1.50    2.10
  -6  -1 -11   -1.10    2.00
   6  -1  11   -1.40    1.80
   6   1  12    0.10    2.30
  -6   1 -12    0.30    2.40
  -6  -1 -12    0.00    2.10
   6  -1  12    0.60    2.10
   6   2 -14   29.70    3.90
  -6   2  14   30.80    4.00
  -6  -2  14   26.10    3.10
   6  -2 -14   25.00    3.60
   6   2 -13   28.20    3.60
  -6   2  13   28.10    3.70
   6  -2 -13   31.20    3.60
  -6  -2  13   32.50    3.30
  -6   2  12   24.80    3.30
   6   2 -12   23.10    3.20
   6  -2 -12   26.70    3.10
  -6  -2  12   22.00    2.80
  -6   2  11   93.29    6.60
   6   2 -11  102.99    6.60
  -6  -2  11   98.69    6.20
   6  -2 -11   90.79    6.40
  -6   2  10  115.59    7.20
   6   2 -10  112.99    7.00
  -6  -2  10  117.29    6.90
   6  -2 -10  107.59    7.00
  -6   2   9   41.80    4.30
   6   2  -9   51.19    4.20
   6  -2  -9   43.40    4.10
  -6  -2   9   50.39    3.90
   6   2  -8  104.99    6.20
  -6   2   8  104.39    6.30
   6  -2  -8  106.09    6.20
  -6  -2   8  101.59    6.10
   6   2  -7   16.40    1.90
  -6   2   7   10.70    1.80
  -6  -2   7   17.80    1.90
  -6  -2   7   20.80    1.90
   6  -2  -7   16.70    2.00
  -6   2   6   -0.60    1.20
   6   2  -6   -0.50    1.30
   6  -2  -6   -0.20    1.00
  -6  -2   6    0.30    0.90
   6  -2  -6   -1.30    1.30
   6  -2  -6    0.40    2.00
  -6  -2   6   -0.30    1.20
  -6   2   5  205.58   11.40
   6   2  -5  240.28   11.30
  -6   2   5  231.18   11.40
   6   2  -5  222.68   11.30
   6  -2  -5  224.58   11.80
   6  -2  -5  208.88   11.40
  -6  -2   5  222.68   11.30
  -6  -2   5  225.48   11.20
   6  -2  -5  239.48   11.30
  -6   2   4 1109.59   51.29
   6   2  -4 1100.79   51.29
   6   2  -4 1003.70   51.19
  -6   2   4  889.21   51.19
  -6  -2   4 1140.49   51.29
   6  -2  -4 1035.30   51.29
   6  -2  -4 1131.69   51.59
   6  -2  -4  979.30   51.19
  -6  -2   4 1102.29   51.19
  -6   2   3    4.00    1.00
  -6   2   3    4.50    1.00
   6   2  -3    4.10    0.90
   6   2  -3    4.60    0.90
   6  -2  -3    4.90    0.80
   6  -2  -3    5.80    1.20
   6  -2  -3    3.70    1.50
  -6  -2   3    6.50    1.00
  -6  -2   3    5.60    0.80
  -6   2   2   25.80    1.90
   6   2  -2   25.80    1.80
   6   2  -2   25.10    1.80
  -6   2   2   29.40    1.90
   6  -2  -2   25.40    1.80
   6  -2  -2   24.50    2.00
  -6  -2   2   29.20    1.70
  -6  -2   2   24.90    1.90
   6  -2  -2   25.50    2.10
   6   2  -1  660.23   35.00
  -6   2   1  727.03   35.00
  -6   2   1  675.83   35.00
   6   2  -1  693.53   35.00
  -6  -2   1  735.13   35.00
   6  -2  -1  758.92   35.00
  -6  -2   1  752.62   35.00
   6  -2  -1  736.83   35.00
   6  -2  -1  745.73   35.00
  -6   2   0  503.65   26.30
   6   2   0  503.95   26.30
  -6   2   0  569.04   26.30
   6   2   0  576.04   26.30
  -6  -2   0  570.34   26.30
  -6  -2   0  495.65   26.30
   6  -2   0  552.74   26.30
   6  -2   0  547.85   26.30
   6   2   1    0.90    0.70
   6   2   1   -0.60    1.10
  -6   2  -1   -0.40    0.60
   6   2   1    0.70    0.80
  -6   2  -1    0.10    0.60
  -6  -2  -1   -0.20    0.60
   6  -2   1   -0.20    0.60
  -6  -2  -1    0.20    0.70
   6  -2   1   -0.50    0.70
   6   2   2  158.18    8.70
  -6   2  -2  172.98    8.40
  -6   2  -2  162.18    8.40
   6   2   2  164.68    8.40
   6  -2   2  166.48    8.40
  -6  -2  -2  165.98    8.40
  -6  -2  -2  167.98    8.40
   6  -2   2  171.28    8.40
  -6   2  -3  102.09    5.20
   6   2   3   89.89    5.30
   6   2   3  105.99    5.70
  -6   2  -3   97.39    5.20
   6   2   3  106.29    5.30
  -6   2  -3   96.29    5.10
  -6  -2  -3  106.19    5.20
   6  -2   3   90.89    5.10
   6  -2   3  104.09    5.20
  -6  -2  -3   84.69    5.30
  -6   2  -4    0.30    1.00
   6   2   4   -0.70    1.60
  -6   2  -4    0.50    0.90
   6   2   4   -1.40    1.10
   6  -2   4    0.90    0.90
  -6  -2  -4   -0.10    1.00
  -6  -2  -4   -0.20    0.80
   6  -2   4   -0.80    0.80
  -6  -2  -4    0.20    1.30
  -6   2  -5    3.80    1.30
  -6   2  -5    6.90    1.50
   6   2   5    2.60    1.30
   6   2   5    5.00    2.20
  -6  -2  -5    2.90    1.10
   6  -2   5    4.80    1.20
   6  -2   5    5.60    1.10
   6   2   6    0.10    1.50
   6   2   6   -0.30    2.10
  -6   2  -6   -1.10    1.60
  -6   2  -6   -2.90    1.30
   6  -2   6   -2.90    1.10
  -6  -2  -6    0.00    1.20
  -6   2  -7    1.50    1.60
   6   2   7    0.40    2.60
   6   2   7   -1.70    1.60
  -6   2  -7    1.20    1.90
   6  -2   7   -0.20    1.30
  -6  -2  -7   -2.00    1.40
   6   2   8   -1.20    1.70
   6   2   8    1.20    2.90
  -6   2  -8   -1.40    1.60
   6  -2   8    0.30    1.40
  -6  -2  -8    0.40    1.50
  -6   2  -9   14.80    2.30
   6   2   9   11.20    2.30
  -6  -2  -9    8.70    1.90
   6  -2   9   14.40    2.00
   6   2  10    7.80    2.20
  -6   2 -10   12.90    2.30
  -6  -2 -10    9.80    2.10
   6  -2  10   14.20    2.10
  -6   2 -11   -2.30    2.10
   6   2  11   -0.30    2.20
  -6  -2 -11    0.20    1.90
   6  -2  11   -1.00    1.80
   6   2  12   11.10    2.80
  -6   2 -12    7.90    2.60
   6  -2  12   14.80    2.40
  -6  -2 -12   11.00    2.50
  -6   3  14    2.10    3.30
   6   3 -14    2.80    3.00
  -6  -3  14    3.00    2.00
   6  -3 -14    1.50    2.70
  -6   3  13    4.40    3.00
   6   3 -13    1.10    2.80
   6  -3 -13    3.70    2.50
  -6  -3  13    1.90    1.90
  -6   3  12    5.40    2.70
   6   3 -12   -0.20    2.50
  -6  -3  12    2.50    1.80
   6  -3 -12    3.90    2.40
   6   3 -11   13.70    2.60
  -6   3  11   12.10    2.70
  -6  -3  11   10.10    2.10
   6  -3 -11   11.10    2.40
  -6   3  10    3.50    2.40
   6   3 -10    4.60    2.30
   6  -3 -10    3.20    2.20
  -6  -3  10    5.80    1.90
   6   3  -9   -5.30    1.90
   6  -3  -9   -1.40    1.90
  -6  -3   9   -5.10    1.50
  -6   3   8   40.90    3.30
   6   3  -8   32.00    3.50
  -6  -3   8   31.00    3.20
   6  -3  -8   38.50    3.40
  -6  -3   8   39.40    2.70
  -6   3   7   -3.30    1.50
   6   3  -7    0.30    1.40
   6  -3  -7   -0.20    1.40
   6  -3  -7   -1.60    1.40
  -6  -3   7    1.20    0.90
  -6  -3   7   -0.70    1.30
  -6   3   6   33.00    2.80
   6   3  -6   28.90    2.70
   6  -3  -6   31.80    2.50
   6  -3  -6   28.00    2.80
  -6  -3   6   28.80    2.60
  -6  -3   6   32.50    2.10
   6   3  -5  207.38   10.80
  -6   3   5  226.08   11.20
  -6   3   5  202.48   10.80
   6   3  -5  201.48   10.80
   6  -3  -5  215.68   10.90
   6  -3  -5  228.58   10.70
  -6  -3   5  220.28   10.80
  -6  -3   5  212.28   10.60
   6  -3  -5  207.88   11.20
  -6   3   4  619.04   30.50
   6   3  -4  675.73   30.50
  -6   3   4  649.54   30.60
   6   3  -4  630.84   30.50
  -6  -3   4  615.64   30.40
   6  -3  -4  579.54   30.50
   6  -3  -4  602.84   30.80
  -6  -3   4  613.34   30.50
   6  -3  -4  638.34   30.40
  -6   3   3   -0.80    0.80
   6   3  -3   -1.50    0.80
   6   3  -3    0.00    0.80
  -6   3   3    2.80    1.60
  -6   3   3   -1.40    0.90
  -6  -3   3   -1.80    0.80
   6  -3  -3   -0.90    0.60
  -6  -3   3    0.00    0.50
   6  -3  -3   -1.90    0.90
   6  -3  -3    0.30    1.20
   6   3  -2   47.40    2.80
  -6   3   2   43.10    2.80
  -6   3   2   52.19    2.90
   6   3  -2   46.80    2.80
  -6   3   2   56.99    3.40
   6  -3  -2   48.60    2.70
  -6  -3   2   49.99    2.60
  -6  -3   2   46.90    2.80
   6  -3  -2   46.80    2.90
   6  -3  -2   47.50    2.90
   6   3  -1    9.20    0.90
  -6   3   1    7.80    0.90
  -6   3   1    8.70    1.00
  -6   3   1    9.90    1.40
   6   3  -1    6.40    0.80
   6  -3  -1    8.60    1.00
   6  -3  -1    9.50    0.90
   6  -3  -1   10.70    1.10
  -6  -3   1    9.00    0.90
  -6  -3   1    8.20    0.80
  -6   3   0  352.76   18.20
   6   3   0  397.66   18.30
  -6   3   0  392.26   18.20
   6   3   0  341.87   18.20
  -6   3   0  375.86   18.20
   6  -3   0  380.66   18.20
  -6  -3   0  361.46   18.20
  -6  -3   0  387.36   18.20
   6  -3   0  363.56   18.20
   6   3   1   21.00    1.60
   6   3   1   18.00    2.20
   6   3   1   15.60    1.70
  -6   3  -1   21.40    1.50
  -6   3  -1   20.80    1.50
  -6   3  -1   19.00    1.30
   6  -3   1   21.90    1.50
   6  -3   1   19.80    1.60
  -6  -3  -1   21.40    1.70
  -6  -3  -1   18.50    1.50
  -6   3  -2   25.30    1.60
   6   3   2   21.60    1.80
  -6   3  -2   24.00    1.70
   6   3   2   21.20    2.50
   6   3   2   20.60    2.00
   6  -3   2   22.00    1.70
  -6  -3  -2   21.40    1.70
   6  -3   2   21.00    1.60
  -6  -3  -2   23.00    1.80
   6   3   3    2.60    1.10
  -6   3  -3    3.40    0.90
  -6   3  -3    3.40    0.80
   6   3   3    4.90    1.80
  -6  -3  -3    3.00    0.80
   6  -3   3    3.40    0.90
   6  -3   3    3.90    0.80
  -6  -3  -3    3.10    1.00
   6   3   4   -1.00    1.10
  -6   3  -4   -1.70    1.20
   6   3   4   -0.90    1.90
  -6   3  -4    0.80    1.00
   6  -3   4    2.00    0.90
  -6  -3  -4    0.10    0.80
   6  -3   4    0.80    0.80
  -6  -3  -4    0.00    1.00
  -6   3  -5   81.89    5.00
   6   3   5   91.59    5.10
  -6   3  -5   86.59    4.90
   6   3   5   85.09    5.80
   6  -3   5   86.09    4.80
  -6  -3  -5   80.89    4.80
   6  -3   5   80.89    4.60
   6   3   6  277.37   14.90
  -6   3  -6  268.87   14.00
   6   3   6  271.87   14.20
  -6   3  -6  275.57   14.20
   6  -3   6  271.77   14.00
   6  -3   6  292.57   13.90
  -6  -3  -6  276.37   14.00
   6   3   7    1.70    2.70
  -6   3  -7   -2.40    1.50
  -6   3  -7    1.40    2.00
   6   3   7   -0.80    1.80
  -6  -3  -7   -0.40    1.30
   6  -3   7    0.60    1.20
  -6   3  -8    5.60    1.80
   6   3   8    2.90    2.00
   6   3   8    4.00    3.10
  -6  -3  -8    3.40    1.60
   6  -3   8    5.70    1.40
  -6   3  -9    0.20    1.80
   6   3   9    1.30    2.10
   6   3   9    1.50    3.20
   6  -3   9    1.80    1.40
  -6  -3  -9    0.10    1.60
  -6   3 -10    8.00    2.20
   6   3  10    5.30    2.40
  -6  -3 -10    3.80    1.80
   6  -3  10    2.10    1.60
  -6   3 -11    3.40    2.30
   6   3  11    4.60    2.50
   6  -3  11    3.40    1.70
  -6  -3 -11    3.20    2.00
   6   3  12    6.20    2.50
  -6   3 -12    0.60    2.40
   6  -3  12    1.20    1.80
  -6  -3 -12    2.10    2.10
   6   4 -13   -0.30    2.80
  -6   4  13    1.30    3.10
  -6  -4  13    1.60    1.70
   6  -4 -13   -5.10    2.30
  -6   4  12   -0.20    2.70
   6   4 -12   -1.90    2.50
   6  -4 -12   -2.20    2.20
  -6  -4  12    0.40    1.50
  -6   4  11    2.80    2.60
   6   4 -11    5.60    2.40
  -6  -4  11    4.00    1.60
   6  -4 -11    2.60    2.10
  -6   4  10   35.30    3.70
   6   4 -10   46.60    4.50
   6  -4 -10   44.50    4.10
  -6  -4  10   47.50    3.50
   6   4  -9   -0.30    1.90
  -6   4   9   -3.30    2.10
  -6  -4   9   -0.20    1.30
  -6  -4   9    0.70    1.00
   6  -4  -9   -0.10    1.70
  -6   4   8   11.90    2.40
   6   4  -8   18.40    2.30
  -6  -4   8   19.90    1.80
   6  -4  -8   19.80    2.20
  -6  -4   8   18.70    1.80
   6   4  -7   20.50    2.10
  -6   4   7   20.10    2.30
   6  -4  -7   21.40    2.10
  -6  -4   7   21.80    1.70
  -6  -4   7   21.40    2.20
   6  -4  -7   22.00    2.30
  -6   4   6    3.50    1.50
   6   4  -6    3.80    1.30
   6  -4  -6    3.90    1.00
  -6  -4   6    4.70    1.10
   6  -4  -6    4.00    1.30
  -6  -4   6    4.20    0.70
  -6   4   5    2.30    1.30
  -6   4   5    1.60    2.20
   6   4  -5    1.60    1.00
   6   4  -5    3.10    1.10
   6  -4  -5    1.20    0.70
  -6  -4   5    1.60    0.80
  -6  -4   5    1.50    0.60
   6  -4  -5    2.20    1.10
  -6   4   4  241.48   12.70
   6   4  -4  237.28   12.00
   6   4  -4  253.27   12.00
  -6   4   4  229.88   12.10
  -6   4   4  245.38   12.10
   6  -4  -4  233.48   12.40
   6  -4  -4  233.58   11.90
   6  -4  -4  242.58   12.00
  -6  -4   4  246.28   11.90
  -6  -4   4  243.18   11.80
  -6   4   3   68.69    4.50
  -6   4   3   60.29    3.80
  -6   4   3   73.19    3.90
   6   4  -3   76.99    3.80
   6   4  -3   63.69    3.70
  -6  -4   3   68.79    3.60
   6  -4  -3   70.49    3.60
  -6  -4   3   69.59    3.50
   6  -4  -3   68.09    4.10
   6  -4  -3   67.19    3.80
  -6   4   2  135.69    7.30
   6   4  -2  138.79    6.90
   6   4  -2  129.49    6.80
  -6   4   2  123.39    6.80
  -6   4   2  145.29    6.90
  -6  -4   2  134.89    6.70
  -6  -4   2  138.19    6.80
   6  -4  -2  135.39    6.70
   6  -4  -2  135.59    7.10
   6  -4  -2  139.49    6.80
   6   4  -1  102.29    4.90
  -6   4   1   84.09    4.80
   6   4  -1   87.89    4.90
  -6   4   1   99.69    4.90
  -6   4   1   96.09    5.20
   6  -4  -1   92.99    4.70
  -6  -4   1   96.59    4.80
  -6  -4   1   94.29    4.80
  -6   4   0    9.00    1.30
  -6   4   0    7.50    0.80
   6   4   0    8.20    0.90
  -6   4   0    7.20    0.80
   6   4   0    4.60    0.80
  -6  -4   0    6.20    0.80
   6  -4   0    5.90    0.60
  -6  -4   0    6.90    0.80
   6  -4   0    4.70    0.50
  -6   4  -1    2.90    0.60
   6   4   1    3.40    1.70
  -6   4  -1    3.50    1.00
   6   4   1    2.50    0.70
  -6   4  -1    2.30    0.60
   6   4   1    1.70    0.80
  -6  -4  -1    2.30    0.60
   6  -4   1    2.80    0.60
  -6  -4  -1    3.40    0.80
   6  -4   1    2.20    0.50
   6   4   2   12.00    2.30
   6   4   2    6.20    1.10
   6   4   2    8.00    1.00
  -6   4  -2    6.10    0.90
  -6   4  -2    9.70    1.20
  -6   4  -2    9.60    0.90
   6  -4   2    7.20    0.80
  -6  -4  -2    8.90    0.90
  -6  -4  -2    8.90    1.10
   6  -4   2    7.80    0.80
   6   4   3    4.30    2.00
  -6   4  -3    4.80    1.00
  -6   4  -3    4.90    0.80
   6   4   3    6.40    1.30
   6  -4   3    5.50    0.70
   6  -4   3    5.60    0.80
  -6  -4  -3    6.30    1.10
  -6  -4  -3    4.50    0.80
   6   4   4   40.30    4.40
  -6   4  -4   55.49    3.30
   6   4   4   52.69    3.60
   6  -4   4   56.09    3.10
  -6  -4  -4   55.79    3.50
  -6  -4  -4   50.29    3.20
   6  -4   4   52.09    3.00
  -6   4  -5  153.58    7.80
   6   4   5  141.99    8.90
   6   4   5  145.69    8.10
   6  -4   5  151.48    7.60
   6  -4   5  149.99    7.50
  -6  -4  -5  148.19    7.70
  -6  -4  -5  136.99    7.90
   6   4   6  549.05   27.90
   6   4   6  561.94   28.70
  -6   4  -6  562.04   27.70
   6  -4   6  565.14   27.60
  -6  -4  -6  559.34   27.70
   6  -4   6  575.14   27.50
   6   4   7  142.99    9.40
  -6   4  -7  145.89    9.10
   6   4   7  164.38    8.60
  -6   4  -7  149.19    8.20
   6  -4   7  148.89    7.80
  -6  -4  -7  152.38    8.10
   6  -4   7  151.58    8.00
  -6   4  -8    6.60    1.80
   6   4   8    6.70    2.20
   6   4   8    6.10    3.30
   6  -4   8    7.70    1.30
  -6  -4  -8    6.40    1.60
   6   4   9    1.00    2.20
  -6   4  -9    1.00    1.90
   6   4   9    2.70    3.60
  -6  -4  -9    1.00    1.60
   6  -4   9    3.80    1.30
   6   4  10   -5.10    3.70
  -6   4 -10    2.40    2.10
   6   4  10    3.10    2.40
   6  -4  10    0.80    1.40
  -6  -4 -10    2.40    1.80
  -6   4 -11   17.30    2.90
   6   4  11   23.50    3.30
  -6  -4 -11   16.50    2.50
   6  -4  11   16.10    2.10
  -6   5  13    8.40    3.20
   6   5 -13    3.10    2.90
   6  -5 -13    3.10    2.30
  -6   5  12   22.20    3.50
   6   5 -12   12.30    2.90
   6  -5 -12   14.80    2.50
  -6   5  11    5.90    2.80
   6   5 -11    6.20    2.50
   6  -5 -11    2.30    1.90
  -6  -5  11    4.30    1.20
  -6   5  10   -3.40    2.30
   6   5 -10   -2.60    2.10
   6  -5 -10   -3.20    1.70
  -6  -5  10   -0.60    1.00
   6   5  -9    1.50    1.90
  -6   5   9   -0.10    2.20
  -6  -5   9   -0.20    0.90
   6  -5  -9   -0.50    1.60
   6   5  -8   -1.60    1.60
  -6   5   8   -2.70    1.90
   6  -5  -8   -2.50    1.10
   6  -5  -8   -1.80    1.40
  -6  -5   8   -1.10    0.80
  -6  -5   8   -0.60    0.80
  -6   5   7   44.90    4.10
  -6   5   7   46.20    5.30
   6   5  -7   53.99    3.70
  -6  -5   7   48.50    2.60
   6  -5  -7   48.90    3.10
  -6  -5   7   46.80    2.70
   6  -5  -7   49.50    3.40
  -6   5   6    2.10    1.60
  -6   5   6    2.70    2.70
   6   5  -6    4.70    1.40
   6  -5  -6    1.40    0.80
   6  -5  -6    0.10    1.10
  -6   5   5   42.20    3.20
   6   5  -5   43.60    3.00
  -6   5   5   42.20    4.40
   6  -5  -5   40.90    2.40
   6  -5  -5   36.30    2.70
   6   5  -4  199.98   10.20
  -6   5   4  199.18   11.10
   6   5  -4  206.68   10.20
  -6   5   4  215.28   10.40
   6  -5  -4  198.48   10.00
   6  -5  -4  198.18   10.00
  -6   5   3   48.20    3.20
   6   5  -3   52.19    3.00
   6   5  -3   52.49    3.00
  -6   5   3   52.19    4.10
  -6   5   3   54.19    3.20
   6  -5  -3   46.40    3.50
   6   5  -2   41.00    2.40
  -6   5   2   38.30    2.60
   6   5  -2   41.10    2.50
  -6   5   2   40.90    2.50
  -6   5   2   40.90    3.40
   6   5  -1   44.00    2.70
  -6   5   1   48.00    3.40
   6   5  -1   45.20    2.70
  -6   5   1   47.00    2.70
  -6   5   1   45.50    2.60
  -6   5   0    5.10    0.70
   6   5   0    3.40    0.70
  -6   5   0    4.90    1.50
   6   5   0    4.10    0.80
  -6   5   0    3.40    0.70
  -6   5  -1   20.00    2.00
  -6   5  -1   18.90    1.50
  -6   5  -1   18.60    1.50
   6   5   1   20.00    1.80
   6   5   1   21.00    2.80
   6   5   1   19.00    1.60
  -6  -5  -1   19.40    1.30
  -6  -5  -1   19.10    1.40
   6   5   2   40.00    3.80
  -6   5  -2   44.40    3.00
   6   5   2   47.40    3.00
  -6   5  -2   45.40    2.70
  -6   5  -2   47.10    2.60
  -6  -5  -2   48.20    2.70
  -6  -5  -2   44.10    2.60
  -6   5  -3  103.79    5.50
   6   5   3  106.99    5.70
  -6   5  -3  105.09    5.50
   6   5   3   94.79    6.70
  -6  -5  -3  106.89    5.50
  -6  -5  -3   99.89    5.30
   6   5   4   27.80    4.00
  -6   5  -4   25.70    2.40
  -6  -5  -4   32.60    2.50
  -6  -5  -4   28.80    2.10
   6   5   5   18.70    2.30
   6   5   5   30.10    3.80
  -6   5  -5   20.00    2.00
  -6  -5  -5   28.40    2.20
  -6  -5  -5   25.60    2.50
   6  -5   5   23.70    1.50
   6   5   6   24.80    3.80
  -6   5  -6   20.90    2.10
   6   5   6   18.40    2.40
   6  -5   6   22.70    1.70
  -6  -5  -6   25.20    2.40
   6  -5   6   20.70    2.00
   6   5   7   15.90    3.70
   6   5   7   15.90    2.50
  -6   5  -7   12.70    1.90
   6  -5   7   12.70    1.20
  -6  -5  -7   13.00    1.60
   6   5   8    8.30    3.30
  -6   5  -8    6.30    1.90
   6   5   8   11.40    2.40
  -6  -5  -8    6.00    1.50
   6  -5   8    7.20    1.10
   6   5   9    2.00    2.30
  -6   5  -9   -0.50    1.80
   6   5   9   -2.20    3.10
   6  -5   9   -1.30    1.00
  -6  -5  -9    0.90    1.50
   6   5  10   -1.60    3.90
  -6   5 -10    0.10    2.10
   6   5  10   -0.10    2.40
  -6  -5 -10    0.80    1.70
   6   5  11    7.40    2.90
  -6   5 -11   -1.30    2.30
   6   5  11   -2.70    4.40
  -6  -5 -11   -0.30    1.90
  -6   6  12   25.40    3.60
   6   6 -12   15.90    3.10
   6   6 -11    2.90    2.40
  -6   6  11    5.40    2.90
  -6   6  10    2.80    2.50
   6   6 -10    2.30    2.20
   6   6  -9   -0.40    1.90
  -6   6   9   -0.80    2.20
  -6   6   8   14.40    4.10
  -6   6   8   15.90    2.50
   6   6  -8   14.40    2.10
  -6   6   7   -0.80    3.20
   6   6  -7    0.70    1.50
  -6   6   7   -1.50    1.70
  -6   6   6    4.00    3.20
   6   6  -6    4.40    1.40
  -6   6   6    7.20    1.80
   6  -6  -6    4.90    0.70
  -6   6   5   18.80    3.40
  -6   6   5   14.10    1.80
   6   6  -5   14.10    1.60
  -6   6   4   13.00    1.60
  -6   6   4   13.90    3.00
   6   6  -4   12.60    1.50
   6   6  -4    9.80    1.30
   6   6  -3  310.17   15.10
   6   6  -3  307.77   15.10
  -6   6   3  304.97   16.00
  -6   6   3  301.17   15.20
  -6   6   2   30.80    3.40
  -6   6   2   30.90    2.30
   6   6  -2   31.00    2.20
   6   6  -2   29.90    2.10
  -6   6   2   32.70    2.30
   6   6  -1   33.60    2.20
  -6   6   1   32.20    2.20
  -6   6   1   33.30    2.20
   6   6  -1   32.60    2.20
  -6   6   1   36.10    3.40
   6   6   0    0.40    0.70
  -6   6   0   -0.90    0.60
   6   6   0   -0.20    0.70
  -6   6   0    0.80    1.70
   6   6   0   -0.30    1.90
  -6   6   0    0.20    0.70
  -6   6  -1   18.40    1.50
  -6   6  -1   15.90    1.50
   6   6   1   17.70    1.80
  -6   6  -1   19.60    2.20
   6   6   1   20.40    3.10
  -6   6  -2   71.59    3.90
  -6   6  -2   69.59    4.40
   6   6   2   73.69    5.60
   6   6   2   75.79    4.20
  -6   6  -2   69.69    3.90
   6   6   3   38.60    4.50
  -6   6  -3   41.20    2.60
  -6   6  -3   37.10    3.00
   6   6   3   45.10    3.10
  -6  -6  -3   38.10    2.20
  -6  -6  -3   37.80    2.20
  -6   6  -4    4.10    1.10
   6   6   4    7.50    2.80
   6   6   4    2.90    1.40
  -6  -6  -4    3.50    0.80
  -6  -6  -4    4.50    1.00
   6   6   5   36.60    3.60
   6   6   5   40.20    5.00
  -6   6  -5   42.20    3.10
  -6  -6  -5   42.40    2.60
  -6   6  -6    4.00    1.40
   6   6   6    6.40    3.30
   6   6   6    4.50    2.00
  -6  -6  -6    4.80    1.00
   6   6   7    7.40    3.60
  -6   6  -7    5.50    1.60
   6   6   7    3.70    2.10
  -6  -6  -7    5.80    1.20
  -6   6  -8    9.00    2.00
   6   6   8   14.20    4.10
   6   6   8   12.50    2.60
  -6  -6  -8   11.50    1.70
   6   6   9    2.50    2.40
   6   6   9    2.50    4.00
  -6   6  -9    0.40    1.90
  -6  -6  -9    3.00    1.50
   6   6  10    3.40    2.60
   6   6  10   -0.60    4.00
  -6   6 -10    1.40    2.10
  -6  -6 -10   -0.60    1.50
  -6   7  11    3.80    2.90
  -6   7  10    0.80    2.60
  -6   7   9    2.20    2.30
   6   7  -9    0.00    2.10
  -6   7   8    2.30    2.10
   6   7  -8   -0.90    1.70
  -6   7   8   -5.90    3.20
  -6   7   7    0.10    3.40
  -6   7   7    1.60    1.90
   6   7  -7    2.50    1.50
   6   7  -6   -1.00    1.30
  -6   7   6    0.20    3.10
  -6   7   6   -2.10    1.60
   6   7  -5   -0.20    1.10
  -6   7   5    1.30    2.90
  -6   7   5    0.00    1.50
  -6   7   4    3.90    1.40
   6   7  -4    4.30    1.10
  -6   7   4    6.30    2.80
   6   7  -3    1.90    0.80
  -6   7   3    0.50    1.10
  -6   7   3    0.40    2.40
   6   7  -3    0.90    1.20
  -6   7   2   25.90    3.50
   6   7  -2   24.10    1.80
  -6   7   2   21.60    2.10
   6   7  -2   21.20    1.80
  -6   7   1   22.00    1.90
  -6   7   1   21.20    1.80
   6   7  -1   23.40    1.80
  -6   7   1   26.00    3.30
  -6   7   0   23.00    2.80
   6   7   0   18.80    1.80
  -6   7   0   16.00    1.50
   6   7   0   16.40    3.00
  -6   7   0   16.00    1.50
   6   7   1    1.60    0.90
  -6   7  -1    2.30    1.80
  -6   7  -1    1.70    0.70
  -6   7  -1    1.50    0.70
   6   7   1    0.70    2.50
   6   7   2   -1.50    2.50
  -6   7  -2    0.80    0.70
  -6   7  -2    0.50    1.60
   6   7   2    0.20    1.00
   6   7   3   -1.10    1.10
  -6   7  -3    1.70    1.70
   6   7   3    0.80    2.70
  -6   7  -3   -0.60    0.80
   6   7   4    2.10    1.40
  -6   7  -4    0.90    1.60
   6   7   4   -0.80    2.90
  -6   7  -4   -0.60    1.00
  -6   7  -5    1.10    1.10
   6   7   5    1.40    1.60
   6   7   5    0.70    3.10
   6   7   6    2.80    3.30
   6   7   6   -2.00    1.70
  -6   7  -6   -1.80    1.30
   6   7   7   15.90    4.30
   6   7   7    9.90    2.30
   6   7   8    4.90    4.10
   6   7   8    3.40    2.30
   6   7   9   24.80    5.20
   6   7   9   22.50    3.30
  -6   8   9   -7.50    4.20
  -6   8   9    2.80    2.40
  -6   8   8    0.70    4.10
  -6   8   8    7.60    2.40
  -6   8   7   -1.70    3.70
  -6   8   7    4.40    2.10
  -6   8   6    5.90    3.50
  -6   8   6    3.50    1.90
  -6   8   5    2.60    3.20
  -6   8   5    5.00    1.70
  -6   8   4   24.60    3.80
  -6   8   4   21.20    2.20
  -6   8   3    5.80    2.30
  -6   8   3    7.70    2.90
  -6   8   2    0.40    2.30
  -6   8   1    6.60    2.40
   6   8  -1    6.00    2.80
  -6   8   0    9.00    2.40
   6   8   0    4.80    1.10
   6   8   0    7.10    3.00
   6   8   1    1.10    0.90
   6   8   1    1.00    2.80
  -6   8  -1    2.10    2.10
  -6   8  -2   12.40    2.30
   6   8   2    9.10    3.30
   6   8   2    6.60    1.20
  -6   8  -3   18.60    2.50
   6   8   3   21.70    4.10
   6   8   3   12.90    1.70
   6   8   4    9.70    1.70
   6   8   4   12.30    3.80
   6   8   5    7.30    1.80
   6   8   5    5.60    3.50
   6   8   6    0.40    1.80
   6   8   6    0.60    3.30
   6   8   7   14.30    4.60
   6   8   7   11.70    2.40
  -6   9   7   -2.60    4.00
  -6   9   6   12.40    4.30
  -6   9   5    7.40    3.90
  -6   9   4    5.40    3.50
  -6   9   3    5.50    3.10
  -6   9   2    0.40    2.60
   6   9  -2    3.80    3.10
  -6   9   1    3.80    2.60
   6   9  -1    4.10    3.20
   6   9   0    2.80    3.10
  -6   9   0    6.00    2.60
  -6   9  -1   11.90    2.80
   6   9   1    6.30    3.20
   6   9   2   29.00    4.70
   6   9   3    1.30    3.30
   6   9   4    5.50    3.40
   6   9   5    2.40    3.70
  -6  10   4    3.80    3.70
  -6  10   3    7.10    3.40
   6  10  -3    2.00    3.20
   6  10  -2    5.60    3.50
  -6  10   2    2.30    3.00
  -6  10   1    3.70    3.50
   6  10  -1    1.90    3.30
   6  10   0    6.50    3.70
   6  10   1    2.90    3.50
   6  10   2    4.10    3.70
  -7   0  15    4.30    2.90
   7   0 -15    6.10    3.20
   7   0 -14    3.40    3.10
  -7   0  14    2.90    2.70
  -7   0  13    4.50    2.60
   7   0 -13    4.60    2.70
  -7   0  12    6.40    2.50
   7   0 -12    2.70    2.60
  -7   0  11   -0.70    2.30
   7   0 -11    0.40    2.30
  -7   0  10    4.20    2.20
   7   0 -10    2.40    2.10
  -7   0   9   -0.90    1.90
   7   0  -9   -0.50    1.80
   7   0  -8  395.06   19.60
  -7   0   8  380.56   19.50
   7   0  -7    0.00    1.50
  -7   0   7    0.20    1.30
   7   0  -6   -1.60    1.30
  -7   0   6   -1.70    1.00
  -7   0   6   -0.60    1.20
   7   0  -5   -0.40    1.00
  -7   0   5    1.00    1.00
   7   0  -5    0.70    1.30
  -7   0   5   -0.20    1.10
   7   0  -4   10.70    1.30
  -7   0   4   20.30    1.60
  -7   0   4   18.20    1.50
   7   0  -4   14.00    1.50
  -7   0   3   -0.50    1.00
  -7   0   3    0.00    0.80
   7   0  -3   -0.60    0.80
   7   0  -3    0.80    1.00
   7   0  -2    1.30    0.90
  -7   0   2    1.60    0.70
   7   0  -2    0.40    0.70
  -7   0   2    1.50    0.80
  -7   0   1   -0.30    0.70
   7   0  -1    0.30    0.70
   7   0  -1   -0.70    0.70
  -7   0   1    0.10    0.60
   7   0   0  219.98   11.40
   7   0   0  227.98   11.30
  -7   0   0  254.17   11.40
  -7   0   0  213.38   11.30
   7   0   1   -0.50    0.80
  -7   0  -1    0.10    0.60
   7   0   1   -0.20    0.60
   7   0   1    0.10    0.70
  -7   0  -1    0.10    0.60
  -7   0  -2   84.89    4.60
   7   0   2   83.19    4.60
  -7   0  -2   85.19    4.60
   7   0   2   89.29    4.60
   7   0   2   84.09    4.60
  -7   0  -3   -0.40    0.70
   7   0   3   -0.70    1.20
   7   0   3   -0.10    0.90
  -7   0  -3   -0.20    0.90
  -7   0  -3    0.20    0.80
   7   0   4   46.50    3.40
  -7   0  -4   48.90    3.10
  -7   0  -4   46.00    3.00
   7   0   5    0.30    1.10
  -7   0  -5   -0.20    1.10
  -7   0  -5    0.90    1.30
  -7   0  -6    0.40    1.50
  -7   0  -6    0.90    1.20
   7   0   6   -1.30    1.30
   7   0   7   -0.60    1.40
  -7   0  -7    0.50    1.40
   7   0   8   13.40    2.00
  -7   0  -8   15.30    2.10
   7   0   9   -0.30    1.80
  -7   0  -9   -0.60    1.70
   7   0  10    1.20    1.90
  -7   0 -10   -1.70    1.90
   7   0  11    0.40    2.10
  -7   0 -11   -1.20    2.00
   7   0  12   -2.50    2.20
  -7   0 -12    1.50    2.30
  -7   1  14    6.40    3.10
   7   1 -14    7.20    3.00
   7  -1 -14    2.00    2.90
  -7  -1  14    8.00    2.70
  -7   1  13    7.50    2.70
   7   1 -13    3.60    2.80
   7  -1 -13    9.30    2.90
  -7  -1  13   10.90    2.70
   7   1 -12   10.90    2.80
  -7   1  12   10.60    2.70
   7  -1 -12    9.60    2.80
  -7  -1  12   14.10    2.70
  -7   1  11    0.00    2.40
   7   1 -11   -4.00    2.20
   7  -1 -11   -1.00    2.30
  -7  -1  11    0.20    2.20
  -7   1  10   13.10    2.60
   7   1 -10   12.40    2.50
  -7  -1  10   15.70    2.40
   7  -1 -10   14.00    2.60
   7   1  -9    1.80    2.00
  -7   1   9    2.00    2.10
   7  -1  -9    1.80    2.00
  -7  -1   9    3.20    1.90
   7   1  -8   34.40    3.40
  -7   1   8   35.10    3.50
  -7  -1   8   33.90    3.00
   7  -1  -8   38.90    3.60
   7   1  -7   -0.70    1.40
  -7   1   7   -0.20    1.50
   7  -1  -7    1.80    1.50
  -7  -1   7    0.00    1.40
  -7   1   6    9.80    1.60
   7   1  -6   11.00    1.70
  -7  -1   6   11.40    1.60
   7  -1  -6    7.00    1.60
  -7  -1   6   10.90    1.30
   7  -1  -6    8.80    1.40
  -7   1   5   90.49    5.40
  -7   1   5   92.49    5.50
   7   1  -5   95.89    5.50
   7   1  -5  105.09    5.40
   7  -1  -5  101.59    5.60
  -7  -1   5  102.19    5.50
  -7  -1   5  104.29    5.40
   7  -1  -5  108.39    5.50
   7   1  -4 1166.48   56.29
  -7   1   4 1188.88   56.29
   7   1  -4 1123.49   56.29
  -7   1   4 1134.59   56.29
   7  -1  -4 1100.59   56.29
  -7  -1   4 1247.28   56.39
  -7  -1   4 1166.28   56.29
   7  -1  -4 1147.29   56.39
  -7   1   3   74.59    4.10
   7   1  -3   67.19    4.10
  -7   1   3   72.59    4.10
   7   1  -3   77.99    4.00
   7  -1  -3   75.49    4.20
  -7  -1   3   77.39    4.10
   7  -1  -3   73.99    4.00
  -7  -1   3   66.49    3.90
  -7   1   2    0.20    0.80
   7   1  -2    0.80    0.70
  -7   1   2    0.60    0.80
   7   1  -2    1.00    0.90
  -7  -1   2   -0.50    0.80
   7  -1  -2    0.40    0.70
   7  -1  -2   -0.60    0.90
  -7  -1   2    0.10    0.70
   7   1  -1  399.46   18.50
  -7   1   1  338.57   18.50
  -7   1   1  395.16   18.50
   7   1  -1  381.76   18.50
  -7  -1   1  377.16   18.50
   7  -1  -1  362.36   18.50
   7  -1  -1  377.06   18.50
  -7  -1   1  384.56   18.50
  -7   1   0    0.90    0.60
  -7   1   0    1.20    0.60
   7   1   0    0.70    0.80
   7   1   0    1.40    0.70
  -7  -1   0    1.40    0.70
   7  -1   0    0.60    0.80
  -7  -1   0    1.40    0.70
   7  -1   0    0.80    0.70
  -7   1  -1   77.49    4.00
   7   1   1   77.99    4.10
   7   1   1   77.99    4.10
   7   1   1   73.59    4.20
  -7   1  -1   71.89    4.00
   7  -1   1   74.49    4.10
  -7  -1  -1   81.69    4.10
   7  -1   1   65.09    3.80
   7  -1   1   78.19    4.00
  -7  -1  -1   74.89    4.00
  -7   1  -2  272.47   12.90
   7   1   2  267.17   13.10
   7   1   2  243.88   12.90
   7   1   2  273.07   13.00
  -7   1  -2  233.28   12.90
   7  -1   2  267.57   12.90
  -7  -1  -2  256.37   12.90
  -7  -1  -2  267.47   12.90
  -7   1  -3   13.10    1.40
  -7   1  -3   15.60    1.40
   7   1   3   17.30    2.00
  -7   1  -3   13.40    1.30
   7   1   3   16.70    1.70
  -7  -1  -3   12.60    1.30
  -7  -1  -3   16.40    1.50
   7  -1   3   14.90    1.40
   7  -1   3   15.80    1.50
   7   1   4   90.69    5.00
   7   1   4   88.39    5.30
  -7   1  -4   90.89    4.90
  -7   1  -4   87.29    4.80
  -7  -1  -4   88.79    5.00
  -7  -1  -4   84.69    4.80
   7  -1   4   77.89    4.80
   7  -1   4   95.09    4.90
  -7   1  -5    3.90    1.30
  -7   1  -5    1.50    1.20
   7   1   5    0.60    1.20
   7   1   5    2.00    1.80
  -7  -1  -5    3.40    1.50
   7  -1   5    0.50    1.10
  -7  -1  -5    1.30    1.10
  -7   1  -6   10.90    1.60
  -7   1  -6   17.30    2.10
   7   1   6   17.20    2.90
   7   1   6    9.20    1.70
  -7  -1  -6    9.30    1.50
   7  -1   6   10.30    1.50
  -7   1  -7    5.00    1.90
   7   1   7    2.60    1.70
  -7   1  -7    1.40    1.60
   7  -1   7    0.30    1.50
  -7  -1  -7    1.60    1.50
  -7   1  -8   17.30    2.30
   7   1   8   18.30    2.30
   7  -1   8   18.10    2.20
  -7  -1  -8   16.70    2.20
   7   1   9    1.80    1.90
  -7   1  -9    1.60    1.80
  -7  -1  -9    4.00    1.90
   7  -1   9    6.70    1.80
   7   1  10    5.90    2.10
  -7   1 -10    5.40    2.00
  -7  -1 -10    2.70    2.00
   7  -1  10    6.70    2.00
  -7   1 -11   -2.20    2.00
   7   1  11    0.10    2.10
   7  -1  11   -0.30    1.90
  -7  -1 -11   -0.50    2.00
   7   1  12    2.70    2.40
  -7   1 -12    0.50    2.30
  -7  -1 -12   -1.60    2.20
   7  -1  12    2.60    2.10
  -7   2  14   70.89    6.50
   7   2 -14   66.59    6.40
  -7  -2  14   60.99    5.30
   7  -2 -14   40.80    4.60
  -7   2  13   -1.60    2.60
   7   2 -13    3.70    2.70
   7  -2 -13    0.80    2.60
  -7  -2  13    4.60    2.30
  -7   2  12   13.40    2.90
   7   2 -12   13.70    2.90
   7  -2 -12   17.40    2.80
  -7  -2  12   12.80    2.40
  -7   2  11   -1.40    2.40
   7   2 -11   -0.30    2.40
  -7  -2  11    0.00    2.00
   7  -2 -11   -1.60    2.20
   7   2 -10   16.10    2.70
  -7   2  10   16.80    2.70
   7  -2 -10   17.80    2.70
  -7  -2  10   18.40    2.50
   7   2  -9   -2.90    2.00
  -7   2   9   -6.30    2.00
   7  -2  -9   -5.00    1.90
  -7  -2   9   -0.80    1.80
   7   2  -8   30.40    2.80
  -7   2   8   36.20    3.50
   7  -2  -8   31.30    2.80
  -7  -2   8   28.70    2.60
   7   2  -7   57.89    4.10
  -7   2   7   61.29    4.20
  -7  -2   7   62.29    3.70
   7  -2  -7   60.29    4.20
  -7  -2   7   62.09    4.20
  -7   2   6  122.09    6.60
   7   2  -6  120.29    6.60
   7  -2  -6  121.79    6.70
   7  -2  -6  117.69    6.40
   7  -2  -6  117.29    7.10
  -7  -2   6  117.89    6.30
  -7  -2   6  121.19    6.50
   7   2  -5  111.09    5.50
  -7   2   5  110.89    5.90
  -7   2   5  102.69    5.70
   7   2  -5  101.09    5.60
  -7  -2   5  102.69    5.40
   7  -2  -5   98.49    5.70
   7  -2  -5   99.89    6.10
  -7  -2   5   95.49    5.60
   7  -2  -5   96.69    5.50
  -7   2   4   23.40    2.20
   7   2  -4   25.20    2.20
   7   2  -4   28.40    2.20
  -7   2   4   24.60    2.30
  -7  -2   4   27.30    2.20
  -7  -2   4   27.30    1.90
   7  -2  -4   26.10    2.00
   7  -2  -4   27.40    2.80
   7  -2  -4   28.20    2.40
  -7   2   3  702.23   33.90
   7   2  -3  760.22   33.90
  -7   2   3  717.33   33.90
   7   2  -3  645.44   33.80
   7  -2  -3  733.43   33.80
   7  -2  -3  699.63   34.10
  -7  -2   3  710.43   33.80
  -7  -2   3  586.74   33.80
   7  -2  -3  697.23   33.90
   7   2  -2  227.98   11.40
  -7   2   2  229.78   11.40
  -7   2   2  245.18   11.40
   7   2  -2  245.78   11.40
   7  -2  -2  228.88   11.50
  -7  -2   2  234.08   11.40
   7  -2  -2  220.98   11.30
  -7  -2   2  231.38   11.40
   7  -2  -2  200.88   11.40
  -7   2   1  893.51   45.60
   7   2  -1  989.60   45.70
   7   2  -1  877.21   45.60
  -7   2   1  972.80   45.70
   7  -2  -1  987.00   45.60
   7  -2  -1  947.41   45.70
   7  -2  -1  933.91   45.60
  -7  -2   1  925.31   45.60
  -7  -2   1  933.31   45.60
   7   2   0    0.20    0.70
  -7   2   0    0.60    0.70
  -7   2   0   -0.50    0.60
   7   2   0   -0.70    0.70
   7  -2   0    1.20    0.80
  -7  -2   0    0.20    0.70
  -7  -2   0    0.90    0.70
   7  -2   0    0.30    0.60
  -7   2  -1    8.00    1.00
   7   2   1    8.00    1.10
   7   2   1    7.20    0.90
   7   2   1   10.60    1.70
  -7   2  -1    7.50    0.90
  -7  -2  -1    6.00    0.90
  -7  -2  -1    9.80    1.00
   7  -2   1    9.30    1.00
   7  -2   1    8.70    1.00
   7   2   2  212.58   11.10
   7   2   2  232.98   11.10
   7   2   2  215.88   11.40
  -7   2  -2  213.48   11.10
  -7   2  -2  231.68   11.10
  -7  -2  -2  208.78   11.10
   7  -2   2  236.88   11.10
  -7  -2  -2  224.88   11.10
   7  -2   2  219.98   11.10
  -7   2  -3   20.60    1.90
   7   2   3   21.70    2.10
  -7   2  -3   20.30    1.40
   7   2   3   22.60    2.50
  -7   2  -3   19.40    1.90
  -7  -2  -3   21.40    1.80
   7  -2   3   20.70    1.80
   7  -2   3   23.20    2.00
  -7  -2  -3   23.00    2.00
   7   2   4   74.99    4.60
  -7   2  -4   82.39    4.50
  -7   2  -4   76.79    4.30
   7   2   4   80.49    5.10
   7  -2   4   75.29    4.40
  -7  -2  -4   81.69    4.40
   7  -2   4   82.59    4.50
   7   2   5    5.60    2.10
  -7   2  -5    2.20    1.30
   7   2   5    1.60    1.30
  -7   2  -5    5.70    1.40
  -7  -2  -5    3.20    1.10
   7  -2   5    4.40    1.30
   7  -2   5    3.20    1.10
   7   2   6    2.70    2.40
  -7   2  -6    0.10    1.40
   7   2   6   -0.50    1.60
  -7   2  -6   -0.30    1.60
   7  -2   6   -1.40    1.10
  -7  -2  -6    0.40    1.20
  -7   2  -7   10.90    2.10
   7   2   7    2.80    1.80
   7   2   7   10.50    2.90
  -7   2  -7    6.10    1.80
   7  -2   7    2.20    1.40
  -7  -2  -7    4.80    1.60
  -7   2  -8   11.10    2.00
   7   2   8   11.10    2.20
   7   2   8   13.70    3.40
   7  -2   8    8.20    1.70
  -7  -2  -8    9.60    1.90
  -7   2  -9   16.60    2.40
   7   2   9   12.50    2.30
   7  -2   9   13.90    2.00
  -7  -2  -9   13.60    2.20
  -7   2 -10    4.20    2.10
   7   2  10    4.90    2.30
   7  -2  10    5.00    1.80
  -7  -2 -10    2.40    1.90
  -7   2 -11    1.00    2.30
   7   2  11   -1.60    2.30
  -7  -2 -11    1.50    2.10
   7  -2  11    2.10    1.80
  -7   2 -12    0.20    2.40
   7   2  12    2.90    2.50
  -7  -2 -12    0.20    2.20
   7  -2  12    2.90    2.00
  -7   3  14    7.20    3.30
   7   3 -14    5.50    3.10
  -7  -3  14    3.70    2.10
   7  -3 -14    4.20    2.80
   7   3 -13   -1.60    2.70
  -7   3  13    0.40    2.80
   7  -3 -13    0.90    2.60
  -7  -3  13    1.20    2.00
   7   3 -12    1.50    2.60
  -7   3  12    1.60    2.60
   7  -3 -12    5.60    2.40
  -7  -3  12    3.50    2.00
   7   3 -11    3.00    2.40
  -7   3  11    2.00    2.40
   7  -3 -11    2.10    2.20
  -7  -3  11    1.90    1.80
   7   3 -10   25.70    2.90
  -7   3  10   19.00    2.80
  -7  -3  10   22.50    2.40
   7  -3 -10   20.40    2.70
  -7   3   9   57.39    4.80
   7   3  -9   58.49    4.60
  -7  -3   9   62.09    4.30
   7  -3  -9   57.19    4.70
   7   3  -8   32.80    3.40
  -7   3   8   33.90    3.10
   7  -3  -8   32.40    2.90
  -7  -3   8   33.90    2.60
  -7  -3   8   31.60    3.30
  -7   3   7   23.20    2.50
   7   3  -7   28.70    2.50
  -7  -3   7   26.50    2.70
  -7  -3   7   25.90    2.20
   7  -3  -7   29.50    3.00
  -7   3   6   32.00    2.90
   7   3  -6   30.70    2.90
   7  -3  -6   36.70    2.60
  -7  -3   6   36.00    2.80
   7  -3  -6   34.50    2.90
  -7  -3   6   33.40    2.30
   7   3  -5  335.07   17.40
   7   3  -5  357.06   17.60
  -7   3   5  348.97   17.40
   7  -3  -5  349.07   17.40
   7  -3  -5  343.67   17.80
   7  -3  -5  370.96   17.30
  -7  -3   5  353.86   17.20
  -7  -3   5  338.87   17.30
  -7   3   4  126.99    6.20
   7   3  -4  112.39    6.10
   7   3  -4  124.39    6.10
  -7   3   4  108.19    6.20
   7  -3  -4  111.69    6.00
   7  -3  -4  113.79    6.50
  -7  -3   4  110.19    6.10
   7  -3  -4  110.19    6.20
  -7  -3   4  125.99    5.90
  -7   3   3    9.30    1.20
  -7   3   3    5.00    1.00
   7   3  -3    8.60    1.10
   7   3  -3    9.20    1.10
   7  -3  -3    5.00    1.20
  -7  -3   3    9.20    0.90
   7  -3  -3   11.50    1.60
  -7  -3   3    6.80    1.10
   7  -3  -3    7.00    0.90
  -7   3   2   28.10    2.00
   7   3  -2   26.40    1.90
   7   3  -2   28.30    1.90
  -7   3   2   27.90    2.00
  -7  -3   2   25.90    2.00
   7  -3  -2   26.10    2.00
   7  -3  -2   27.70    2.20
   7  -3  -2   29.30    1.80
  -7  -3   2   27.30    1.80
   7   3  -1   -0.20    0.70
  -7   3   1   -0.10    0.60
  -7   3   1   -0.20    0.70
   7   3  -1    0.60    0.70
  -7  -3   1    0.30    0.70
   7  -3  -1    0.10    0.80
   7  -3  -1   -0.20    0.50
   7  -3  -1    0.00    0.60
  -7  -3   1    0.00    0.60
  -7   3   0   66.59    3.50
   7   3   0   59.29    3.50
   7   3   0   64.29    3.50
  -7   3   0   63.09    3.40
   7  -3   0   64.29    3.50
   7  -3   0   64.89    3.40
  -7  -3   0   56.99    3.40
  -7  -3   0   64.79    3.50
   7   3   1   44.80    3.40
  -7   3  -1   48.30    2.70
   7   3   1   46.50    2.70
   7   3   1   40.90    2.80
  -7   3  -1   44.20    2.70
   7  -3   1   44.70    2.70
  -7  -3  -1   47.20    2.70
  -7  -3  -1   47.60    2.70
   7  -3   1   43.70    2.70
   7   3   2   43.70    3.40
  -7   3  -2   42.90    2.60
  -7   3  -2   43.60    2.70
   7   3   2   45.60    2.90
  -7  -3  -2   44.50    2.70
   7  -3   2   46.20    2.70
   7  -3   2   45.60    2.70
  -7  -3  -2   41.60    2.70
  -7   3  -3    1.00    0.70
   7   3   3    0.20    1.70
  -7   3  -3    0.60    0.90
   7   3   3    0.30    1.00
   7  -3   3    0.20    0.80
  -7  -3  -3    0.60    1.00
   7  -3   3    0.10    0.80
  -7  -3  -3    0.20    0.80
  -7   3  -4  102.19    5.60
   7   3   4  104.79    6.00
   7   3   4  107.59    6.50
  -7   3  -4  113.49    5.80
   7  -3   4  112.09    5.70
  -7  -3  -4  100.39    5.70
  -7  -3  -4  108.89    5.90
   7  -3   4  105.19    5.60
   7   3   5   34.30    3.10
  -7   3  -5   32.60    2.80
  -7   3  -5   23.60    2.50
   7   3   5   25.30    3.40
   7  -3   5   30.90    2.60
  -7  -3  -5   27.30    2.50
   7  -3   5   30.70    2.40
  -7   3  -6   41.30    3.40
  -7   3  -6   37.50    3.30
   7   3   6   46.90    3.80
   7   3   6   45.20    4.60
   7  -3   6   38.60    3.20
   7  -3   6   46.70    3.20
  -7  -3  -6   39.00    3.20
  -7   3  -7    1.80    1.60
   7   3   7    0.40    2.80
  -7   3  -7    1.60    1.90
   7   3   7    0.60    1.80
   7  -3   7    1.20    1.20
  -7  -3  -7    0.10    1.30
   7   3   8    5.70    2.10
   7   3   8    3.70    3.10
  -7   3  -8    5.30    1.80
  -7  -3  -8    3.10    1.50
   7  -3   8    5.00    1.40
  -7   3  -9   38.30    3.80
   7   3   9   35.60    4.90
   7   3   9   24.30    2.90
   7  -3   9   32.70    3.10
  -7  -3  -9   25.80    2.70
  -7   3 -10   30.60    3.30
   7   3  10   46.70    4.60
  -7  -3 -10   38.70    4.00
   7  -3  10   39.90    3.50
   7   3  11    3.40    2.60
  -7   3 -11    2.50    2.30
   7  -3  11    1.60    1.80
  -7  -3 -11    1.20    2.00
   7  -3  12    5.20    2.00
  -7   4  13   -0.70    3.00
   7   4 -13   -5.20    2.70
   7  -4 -13   -0.30    2.40
  -7  -4  13    1.70    1.70
   7   4 -12   -3.00    2.50
  -7   4  12   -1.60    2.70
   7  -4 -12   -1.30    2.20
  -7  -4  12   -0.40    1.60
  -7   4  11    0.00    2.50
   7   4 -11   -2.10    2.20
   7  -4 -11   -1.70    2.00
  -7  -4  11   -0.70    1.50
   7   4 -10   26.00    3.00
  -7   4  10   18.50    3.00
   7  -4 -10   23.80    2.70
  -7  -4  10   31.70    3.00
  -7   4   9   -2.50    2.10
   7   4  -9    0.20    1.90
   7  -4  -9    0.50    1.80
  -7  -4   9   -0.60    1.20
  -7  -4   9   -2.30    1.30
  -7   4   8   -1.90    1.90
   7   4  -8   -0.30    1.70
   7  -4  -8    0.20    1.60
  -7  -4   8   -0.70    1.30
  -7  -4   8   -0.40    0.80
  -7   4   7   13.30    2.10
   7   4  -7   13.50    2.00
  -7  -4   7   11.20    1.50
   7  -4  -7   16.10    1.90
  -7  -4   7   12.20    1.20
   7  -4  -7   15.00    1.60
  -7   4   6  254.37   13.10
   7   4  -6  259.57   13.00
  -7  -4   6  255.17   12.80
   7  -4  -6  257.87   12.80
   7  -4  -6  262.97   13.00
  -7  -4   6  247.18   12.60
   7   4  -5   14.30    1.50
  -7   4   5   13.40    1.70
  -7  -4   5   13.00    1.30
   7  -4  -5   12.20    1.50
   7  -4  -5   12.80    1.20
   7  -4  -5   12.50    2.50
  -7  -4   5   12.90    1.30
  -7   4   4  126.39    7.00
   7   4  -4  132.99    6.90
  -7   4   4  126.89    7.60
   7   4  -4  148.69    6.90
   7  -4  -4  136.89    6.70
  -7  -4   4  133.19    6.80
   7  -4  -4  134.99    6.90
  -7  -4   4  124.69    6.60
   7  -4  -4  127.09    7.30
  -7   4   3    3.80    1.70
  -7   4   3    1.10    0.90
   7   4  -3    1.30    0.80
   7   4  -3    1.10    0.80
  -7   4   3    1.00    0.90
   7  -4  -3    3.10    1.20
  -7  -4   3   -0.20    0.80
  -7  -4   3    0.80    0.50
   7  -4  -3   -2.20    0.90
   7  -4  -3    0.80    0.60
  -7   4   2   -0.60    0.80
  -7   4   2    0.80    0.70
   7   4  -2    0.30    0.70
  -7   4   2    0.90    1.40
   7   4  -2    0.20    0.70
  -7  -4   2    1.10    0.50
   7  -4  -2   -1.30    0.80
   7  -4  -2    0.70    0.90
  -7  -4   2   -0.60    0.70
   7  -4  -2    0.50    0.40
   7   4  -1   10.50    1.10
  -7   4   1   14.20    1.60
  -7   4   1   12.10    1.10
   7   4  -1   13.60    1.10
  -7   4   1   10.50    1.10
  -7  -4   1   11.20    1.00
   7  -4  -1   12.10    1.00
   7  -4  -1   12.80    1.10
  -7  -4   1   13.10    1.20
   7   4   0  121.49    6.20
  -7   4   0  119.79    6.20
  -7   4   0  107.79    6.00
  -7   4   0  117.19    6.10
   7   4   0  120.49    6.10
  -7  -4   0  119.49    6.10
   7  -4   0  120.69    6.00
   7  -4   0  120.89    6.00
  -7  -4   0  121.09    6.00
   7   4   1    0.50    0.70
   7   4   1   -0.30    1.70
  -7   4  -1    0.10    0.60
  -7   4  -1    0.10    0.80
  -7   4  -1    0.10    0.60
   7   4   1   -0.30    0.80
  -7  -4  -1   -0.30    0.80
   7  -4   1   -0.20    0.60
  -7  -4  -1    0.00    0.70
   7  -4   1    0.20    0.60
   7   4   2   10.30    2.30
  -7   4  -2   10.80    1.10
  -7   4  -2    8.80    1.10
  -7   4  -2    8.10    1.00
   7   4   2    7.90    1.20
  -7  -4  -2    9.30    1.20
   7  -4   2    9.40    0.90
   7  -4   2    7.90    0.90
  -7  -4  -2    9.10    1.00
   7   4   3    3.80    1.20
   7   4   3    4.30    2.20
  -7   4  -3    4.50    1.00
   7  -4   3    7.20    0.90
  -7  -4  -3    5.60    1.10
  -7  -4  -3    5.90    0.90
   7  -4   3    6.70    0.90
  -7   4  -4   35.00    2.70
   7   4   4   39.70    3.10
   7   4   4   30.90    3.90
  -7  -4  -4   32.60    2.80
  -7  -4  -4   33.90    2.50
   7  -4   4   38.70    2.50
   7  -4   4   36.90    2.40
   7   4   5    8.60    2.80
  -7   4  -5    5.70    1.90
  -7   4  -5    9.90    1.60
   7  -4   5    9.00    1.30
   7  -4   5   10.00    1.40
  -7  -4  -5    9.60    1.40
   7   4   6  132.29    8.60
  -7   4  -6  124.19    7.40
   7   4   6  142.69    7.70
  -7   4  -6  136.49    7.40
  -7  -4  -6  131.79    7.20
   7  -4   6  137.89    7.10
   7  -4   6  137.49    7.20
  -7   4  -7   51.39    4.00
   7   4   7   47.30    5.30
   7   4   7   53.79    4.30
   7  -4   7   54.39    3.40
  -7  -4  -7   49.10    3.70
   7   4   8    1.40    3.20
   7   4   8    2.40    2.10
  -7   4  -8   -1.00    1.60
   7  -4   8    0.00    1.20
  -7  -4  -8    0.50    1.40
  -7   4  -9    1.40    1.90
   7   4   9   -0.10    3.50
   7   4   9    2.20    2.10
  -7  -4  -9    1.10    1.60
   7  -4   9   -1.50    1.20
  -7   4 -10   13.80    2.60
   7   4  10   17.00    2.90
   7   4  10   12.80    4.50
   7  -4  10   11.40    1.80
  -7  -4 -10   14.40    2.20
   7   4  11    7.70    2.80
  -7   4 -11    6.20    2.50
  -7  -4 -11    2.80    2.00
   7  -4  11    5.90    1.80
   7   5 -13   18.00    3.30
  -7   5  13   19.80    3.80
   7  -5 -13   10.10    2.60
  -7   5  12    2.70    3.00
   7   5 -12    3.20    2.70
   7  -5 -12   -0.20    2.10
   7   5 -11    9.50    2.70
  -7   5  11    8.10    2.80
  -7  -5  11   11.20    1.50
   7  -5 -11    7.30    2.10
  -7   5  10    1.90    2.40
   7   5 -10    0.30    2.10
   7  -5 -10   -0.80    1.80
  -7  -5  10   -0.10    1.10
  -7   5   9    8.90    2.50
   7   5  -9   11.10    2.20
   7  -5  -9    9.80    1.90
  -7  -5   9   12.00    1.30
   7   5  -8    5.80    1.90
  -7   5   8    5.40    2.10
   7  -5  -8    5.20    1.60
   7  -5  -8    9.10    1.70
  -7  -5   8    8.20    1.10
  -7   5   7   17.40    2.30
   7   5  -7   16.90    2.00
  -7  -5   7   15.80    1.60
  -7  -5   7   14.10    1.30
   7  -5  -7   15.70    1.80
   7  -5  -7   17.80    1.50
   7   5  -6   69.29    4.40
  -7   5   6   72.49    4.70
  -7   5   6   70.79    5.80
  -7  -5   6   72.09    3.70
   7  -5  -6   71.09    4.00
  -7  -5   6   70.59    3.60
   7  -5  -6   72.89    4.20
   7   5  -5    1.40    1.10
  -7   5   5    1.40    1.30
  -7   5   5   -0.90    2.50
   7  -5  -5    2.10    1.00
   7  -5  -5   -0.10    0.60
  -7   5   4  322.57   17.00
   7   5  -4  330.47   16.90
  -7   5   4  352.16   17.70
   7  -5  -4  346.67   17.80
   7  -5  -4  352.56   16.80
   7  -5  -4  347.07   16.70
  -7   5   3   56.99    3.30
   7   5  -3   51.49    3.20
  -7   5   3   54.09    4.20
   7   5  -3   54.09    3.20
   7  -5  -3   54.79    3.60
   7  -5  -3   54.29    2.80
   7  -5  -3   50.19    2.90
  -7   5   2   50.49    3.80
  -7   5   2   53.19    3.10
   7   5  -2   52.39    3.00
  -7   5   2   50.39    3.10
   7   5  -2   52.69    3.00
  -7   5   1   11.50    1.10
   7   5  -1    9.30    1.00
  -7   5   1   14.10    1.90
   7   5  -1   10.10    1.10
  -7   5   1   11.00    1.10
  -7   5   0   27.70    2.00
  -7   5   0   32.10    2.50
   7   5   0   32.80    2.20
  -7   5   0   31.30    2.00
   7   5   0   31.90    2.30
  -7  -5   0   28.50    1.80
  -7  -5   0   29.20    1.80
  -7   5  -1    0.50    1.20
  -7   5  -1    0.50    0.60
   7   5   1   -1.30    2.00
  -7   5  -1   -1.00    0.60
   7   5   1   -0.10    0.80
  -7  -5  -1    0.20    0.70
  -7  -5  -1   -0.80    0.60
  -7   5  -2    6.40    1.00
   7   5   2    5.50    1.20
  -7   5  -2   10.20    1.30
   7   5   2   10.30    2.50
  -7  -5  -2    8.20    0.90
  -7  -5  -2    8.40    1.10
  -7   5  -3    2.30    1.10
   7   5   3    3.40    1.30
   7   5   3   -2.00    2.40
  -7   5  -3    2.10    0.90
  -7  -5  -3    2.40    1.00
  -7  -5  -3    1.30    0.80
  -7   5  -4   99.89    5.30
   7   5   4   95.49    5.60
   7   5   4   83.89    6.40
  -7  -5  -4   96.79    5.10
   7  -5   4   91.59    4.70
  -7  -5  -4   97.99    5.30
   7   5   5   36.00    3.50
  -7   5  -5   30.30    2.90
   7   5   5   40.50    4.60
  -7  -5  -5   29.80    2.80
   7  -5   5   30.70    2.10
  -7  -5  -5   33.10    2.60
   7  -5   5   31.60    2.20
  -7   5  -6   12.20    1.80
   7   5   6   24.60    3.80
   7   5   6   17.60    2.30
  -7  -5  -6   14.50    1.60
   7  -5   6   14.80    1.60
   7   5   7    1.20    1.90
   7   5   7    4.20    3.30
  -7   5  -7    2.30    1.50
   7  -5   7    0.50    0.90
  -7  -5  -7    0.20    1.20
   7   5   8   17.20    2.60
   7   5   8   13.20    3.80
  -7   5  -8   13.00    2.10
   7  -5   8   15.00    1.40
  -7  -5  -8   11.70    1.80
   7   5   9    0.90    3.50
  -7   5  -9    0.50    1.90
   7   5   9   -1.00    2.20
   7  -5   9    0.60    1.30
  -7  -5  -9    0.50    1.60
   7   5  10   -1.00    2.50
   7   5  10    1.40    4.20
  -7   5 -10    0.70    2.20
  -7  -5 -10    0.20    1.70
   7   6 -12    1.90    2.60
  -7   6  12    6.40    3.10
   7   6 -11   19.70    3.00
  -7   6  11   17.80    3.20
   7  -6 -11   18.40    2.30
  -7   6  10    4.70    2.50
   7   6 -10    1.00    2.20
   7  -6 -10   -2.00    1.50
   7   6  -9   -1.60    1.80
  -7   6   9    0.60    2.20
   7  -6  -9   -2.40    1.30
  -7   6   8    5.50    2.10
   7   6  -8    3.90    1.80
   7  -6  -8   -0.40    1.20
   7   6  -7    3.40    1.60
  -7   6   7    4.00    1.90
  -7   6   7    1.90    3.10
   7  -6  -7    2.10    1.00
   7   6  -6    0.10    1.30
  -7   6   6   -0.70    2.90
  -7   6   6   -0.70    1.60
   7  -6  -6    0.70    0.70
  -7   6   5    0.00    2.70
   7   6  -5    1.90    1.20
  -7   6   5    0.80    1.40
   7  -6  -5    0.00    0.20
   7   6  -4  159.78    8.10
  -7   6   4  152.78    9.10
  -7   6   4  158.08    8.30
  -7   6   3   14.10    1.50
   7   6  -3   14.30    1.40
  -7   6   3   12.50    2.70
  -7   6   2   -1.20    1.90
  -7   6   2   -1.10    0.90
   7   6  -2    0.40    0.80
  -7   6   1   -0.70    0.70
  -7   6   1    4.00    1.80
  -7   6   1   -1.00    0.80
   7   6  -1   -0.90    0.70
   7   6   0   29.50    3.70
  -7   6   0   31.70    2.90
  -7   6   0   27.10    2.00
  -7   6   0   27.30    2.00
   7   6   0   28.40    2.20
  -7   6  -1   21.40    2.50
  -7   6  -1   15.90    1.60
  -7   6  -1   19.90    1.70
   7   6   1   21.00    3.20
   7   6   1   14.60    1.50
  -7   6  -2    9.50    1.10
   7   6   2    9.30    1.40
  -7   6  -2   13.80    1.80
   7   6   2   10.90    2.90
   7   6   3  136.79    7.10
  -7   6  -3  131.29    6.70
  -7   6  -3  125.79    6.90
   7   6   3  126.59    8.30
  -7  -6  -3  123.69    6.50
  -7  -6  -3  128.99    6.60
  -7   6  -4   17.40    1.70
   7   6   4   16.00    2.00
   7   6   4   28.90    4.00
  -7  -6  -4   18.30    1.70
   7   6   5    0.00    2.90
  -7   6  -5   -2.00    1.20
   7   6   5   -1.90    1.60
  -7  -6  -5   -2.00    0.80
   7   6   6    8.20    3.30
  -7   6  -6    5.90    1.50
   7   6   6    4.50    1.90
  -7  -6  -6    7.00    1.20
  -7   6  -7    2.70    1.60
   7   6   7    5.30    2.20
   7   6   7    4.80    3.60
  -7  -6  -7    3.50    1.20
   7   6   8    0.30    2.20
   7   6   8   -0.20    3.60
  -7   6  -8   -1.60    1.70
  -7  -6  -8   -0.70    1.30
   7   6   9    1.60    4.00
   7   6   9    1.50    2.50
  -7   6  -9   -0.70    1.90
  -7  -6  -9   -0.30    1.50
  -7   7  11    0.90    2.90
  -7   7  10    1.00    2.50
   7   7  -9    1.60    2.10
  -7   7   9    0.50    2.30
   7   7  -8   -0.50    1.70
  -7   7   8    0.40    2.00
   7   7  -7   -0.80    1.50
  -7   7   7   -2.00    1.80
  -7   7   7   -3.00    3.20
   7   7  -6    2.80    1.40
  -7   7   6   -1.20    3.30
  -7   7   6    1.50    1.70
  -7   7   5    0.40    1.50
   7   7  -5    0.60    1.20
  -7   7   5    1.10    2.90
  -7   7   4   -1.10    1.20
  -7   7   4   -0.10    2.60
   7   7  -4   -0.20    1.00
   7   7  -3    2.50    0.90
  -7   7   3    2.40    1.20
  -7   7   3    1.40    2.40
  -7   7   2   15.30    1.50
   7   7  -2   16.50    1.40
  -7   7   2   16.70    2.80
  -7   7   1    1.30    0.90
  -7   7   1    2.70    2.00
   7   7  -1    1.20    0.80
   7   7   0    1.80    0.90
  -7   7   0    1.00    0.70
  -7   7   0    3.70    1.90
   7   7   0    0.40    2.30
  -7   7  -1    0.00    0.70
  -7   7  -1    1.20    1.80
   7   7   1    1.40    2.70
   7   7   1   -0.30    0.90
   7   7   2    1.90    2.50
  -7   7  -2    0.60    0.80
  -7   7  -2    2.20    1.60
   7   7   2    0.80    1.00
  -7   7  -3    0.80    1.50
   7   7   3   -0.80    1.10
   7   7   3   -1.20    2.70
  -7   7  -3   -0.20    0.80
   7   7   4   -0.30    2.70
  -7   7  -4    0.60    1.60
   7   7   4   -1.30    1.40
  -7   7  -4    0.00    1.00
  -7   7  -5    0.20    1.10
   7   7   5    0.90    1.70
   7   7   5   -1.50    3.10
  -7   7  -6    1.70    1.70
   7   7   6    6.30    3.60
   7   7   6    2.80    1.90
   7   7   7    1.60    2.10
   7   7   7    1.40    3.70
   7   7   8    0.90    3.80
   7   7   8    0.00    2.30
  -7   8   9    7.80    2.60
  -7   8   8    4.30    4.40
  -7   8   8   12.90    2.60
  -7   8   7   19.30    2.60
  -7   8   7   15.40    4.60
  -7   8   6    4.70    3.60
  -7   8   6    0.50    1.80
  -7   8   5    1.00    3.20
  -7   8   5    3.30    1.70
  -7   8   4    3.10    1.70
  -7   8   4    6.40    3.10
  -7   8   3   19.10    3.30
  -7   8   2    2.10    2.40
   7   8  -1    4.70    2.80
  -7   8   1    7.20    2.40
   7   8   0    3.40    1.00
  -7   8   0    8.40    2.30
   7   8   0    4.30    3.00
   7   8   1    9.90    1.30
   7   8   1   12.60    3.50
  -7   8  -1   16.30    2.50
   7   8   2    0.90    3.00
   7   8   2    0.50    1.10
   7   8   3    0.30    1.20
   7   8   3    0.40    3.00
   7   8   4    0.80    1.40
   7   8   4    1.50    3.20
   7   8   5    2.50    3.10
   7   8   5    2.40    1.70
   7   8   6   -2.10    1.80
   7   8   6    1.90    3.70
   7   8   7    4.30    2.30
   7   8   7    4.80    4.00
  -7   9   7   -5.60    4.00
  -7   9   6    4.80    4.00
  -7   9   5   18.60    4.30
  -7   9   4    3.20    3.40
  -7   9   3    2.10    3.00
   7   9  -2    3.70    3.20
  -7   9   2    3.30    2.80
  -7   9   1    4.30    2.60
   7   9  -1    1.40    3.00
  -7   9   0    4.40    2.60
   7   9   0    4.20    3.30
   7   9   1    2.70    3.20
   7   9   2    4.70    3.20
   7   9   3    2.40    3.50
   7   9   4    3.40    3.50
   7   9   5    4.20    3.70
  -7  10   4   -0.60    3.50
  -7  10   3    8.40    5.00
   7  10  -3    4.20    3.40
   7  10  -2    4.80    3.40
   7  10  -1    9.70    3.80
   7  10   0   48.80    6.10
   7  10   1    5.90    3.40
   8   0 -14    7.20    3.10
  -8   0  14   10.50    3.00
  -8   0  13    3.60    2.50
   8   0 -13    2.50    2.80
   8   0 -12    6.90    2.80
  -8   0  12    8.60    2.70
  -8   0  11   -1.50    2.30
   8   0 -11   -1.40    2.40
   8   0 -10   -2.00    2.10
  -8   0  10   -5.00    2.10
   8   0  -9    1.70    2.00
  -8   0   9    1.20    1.90
  -8   0   8   91.09    5.50
   8   0  -8   87.49    5.60
  -8   0   7   -0.10    1.50
   8   0  -7    0.10    1.60
   8   0  -6   45.30    3.50
  -8   0   6   48.00    3.30
  -8   0   5   -0.80    1.30
   8   0  -5   -1.30    1.20
   8   0  -5   -0.90    1.00
  -8   0   5   -0.50    1.00
  -8   0   4    2.70    1.00
   8   0  -4    2.90    1.20
   8   0  -4    4.00    1.00
  -8   0   4    4.20    1.10
   8   0  -3    1.80    1.10
  -8   0   3    0.00    0.80
   8   0  -3    0.90    0.80
  -8   0   3    0.30    0.90
  -8   0   2    3.10    0.80
   8   0  -2    3.00    1.00
   8   0  -2    4.50    0.90
  -8   0   2    4.60    0.90
  -8   0   1   -0.70    0.70
   8   0  -1   -1.10    0.70
   8   0  -1    0.30    0.80
  -8   0   1    0.30    0.70
   8   0   0   71.69    3.80
  -8   0   0   60.59    3.70
  -8   0   0   72.99    3.80
  -8   0  -1    0.80    0.60
   8   0   1   -0.90    0.60
   8   0   1    0.00    0.80
   8   0   1    0.70    0.90
  -8   0  -1    1.00    0.70
   8   0   2   88.29    4.80
  -8   0  -2   87.69    4.70
   8   0   2   83.79    4.70
   8   0   2   88.39    4.70
  -8   0  -2   88.99    4.70
  -8   0  -3   -0.30    0.80
   8   0   3    0.40    1.20
   8   0   3    0.40    1.00
  -8   0  -4   69.89    4.00
  -8   0  -4   66.19    3.90
   8   0   4   69.59    4.10
   8   0   4   64.39    4.20
  -8   0  -5    0.10    1.10
  -8   0  -5    0.40    1.30
   8   0   5   -0.30    1.20
   8   0   6   97.69    5.60
  -8   0  -6   94.99    5.60
  -8   0  -6   95.39    5.60
   8   0   7    0.10    1.50
  -8   0  -7   -0.70    1.40
   8   0   8  167.88    8.90
  -8   0  -8  156.98    8.90
  -8   0  -9   -1.50    1.70
   8   0   9    0.30    1.70
  -8   0 -10    1.10    2.00
   8   0  10    1.50    1.90
   8   0  11    0.90    2.20
  -8   0 -11    0.00    2.10
  -8   0 -12    1.80    2.40
   8   0  12    7.30    2.50
  -8   1  14   -0.90    2.90
   8   1 -14   -4.10    2.90
   8  -1 -14    2.90    3.00
  -8  -1  14    6.60    2.70
  -8   1  13   44.30    4.20
   8   1 -13   33.70    4.00
   8  -1 -13   32.40    3.90
  -8  -1  13   31.90    3.70
  -8   1  12   29.20    3.40
   8   1 -12   33.90    3.70
   8  -1 -12   24.30    3.50
  -8  -1  12   31.60    3.40
   8   1 -11   -3.10    2.40
  -8   1  11   -3.60    2.30
  -8  -1  11   -1.50    2.20
   8  -1 -11   -1.10    2.30
  -8   1  10    9.80    2.50
   8   1 -10    5.20    2.20
  -8  -1  10    6.20    2.30
   8  -1 -10    4.60    2.30
  -8   1   9    4.40    2.00
   8   1  -9   10.60    2.30
   8  -1  -9    5.00    2.10
  -8  -1   9    6.60    2.10
   8   1  -8   17.00    2.30
  -8   1   8   19.40    2.40
  -8  -1   8   24.00    2.40
   8  -1  -8   15.70    2.30
  -8   1   7   29.00    2.90
   8   1  -7   25.00    2.40
   8  -1  -7   21.70    2.30
  -8  -1   7   31.60    2.90
   8   1  -6   48.90    3.60
  -8   1   6   49.00    3.50
  -8  -1   6   53.79    3.20
   8  -1  -6   45.60    3.60
  -8  -1   6   51.69    3.50
  -8   1   5  237.18   13.00
  -8   1   5  270.07   13.70
   8   1  -5  267.27   13.10
   8   1  -5  240.68   13.10
  -8  -1   5  277.97   13.00
   8  -1  -5  255.17   13.10
  -8  -1   5  247.48   12.90
   8  -1  -5  273.57   13.00
  -8   1   4   24.10    2.20
   8   1  -4   27.90    2.30
   8   1  -4   26.10    2.20
   8  -1  -4   26.80    2.40
  -8  -1   4   26.20    2.30
  -8  -1   4   28.80    2.10
   8  -1  -4   28.00    2.10
  -8   1   3  658.23   32.20
  -8   1   3  701.03   32.20
   8   1  -3  599.04   32.20
   8   1  -3  662.73   32.30
  -8  -1   3  686.43   32.20
   8  -1  -3  695.13   32.20
  -8  -1   3  666.23   32.20
   8  -1  -3  612.94   32.20
   8   1  -2   42.90    2.50
  -8   1   2   38.50    2.50
  -8   1   2   40.80    2.60
   8   1  -2   39.20    2.60
   8  -1  -2   38.70    2.50
  -8  -1   2   37.30    2.50
   8  -1  -2   37.70    2.60
  -8  -1   2   41.10    2.50
   8   1  -1   22.20    1.80
  -8   1   1   22.60    1.70
  -8   1   1   21.00    1.70
   8   1  -1   20.10    1.80
   8  -1  -1   21.40    1.70
  -8  -1   1   18.20    1.70
   8  -1  -1   19.00    1.90
  -8  -1   1   22.10    1.80
  -8   1   0   93.19    5.20
   8   1   0  105.89    5.20
  -8   1   0  103.39    5.20
  -8  -1   0   91.49    5.20
   8  -1   0  105.59    5.20
  -8  -1   0  101.99    5.20
   8  -1   0   92.99    5.20
   8   1   1  449.66   22.10
  -8   1  -1  416.96   22.10
   8   1   1  450.15   22.20
  -8   1  -1  466.65   22.10
   8   1   1  439.16   22.10
   8  -1   1  457.65   22.10
   8  -1   1  437.16   22.10
  -8  -1  -1  466.85   22.10
  -8  -1  -1  476.45   22.10
   8  -1   1  444.56   21.90
  -8   1  -2  124.29    6.70
   8   1   2  129.29    6.90
   8   1   2  132.59    6.70
  -8   1  -2  135.99    6.70
   8   1   2  137.59    6.80
   8  -1   2  133.59    6.70
  -8  -1  -2  112.19    6.70
  -8  -1  -2  130.09    6.70
   8  -1   2  130.89    6.70
  -8   1  -3    2.00    0.90
   8   1   3    1.70    1.00
   8   1   3    3.20    1.50
   8  -1   3    4.30    1.10
   8  -1   3    4.00    1.00
  -8  -1  -3    1.60    0.90
   8   1   4   24.30    2.70
   8   1   4   24.10    2.40
  -8   1  -4   23.70    1.90
  -8   1  -4   20.50    2.20
   8  -1   4   25.80    2.20
  -8  -1  -4   21.50    2.20
   8   1   5    2.60    1.90
  -8   1  -5    2.10    1.20
   8   1   5    0.60    1.30
  -8   1  -5   -0.20    1.20
  -8  -1  -5    2.20    1.10
   8  -1   5    1.70    1.10
  -8  -1  -5    3.60    1.50
   8   1   6   14.60    2.70
   8   1   6    8.50    1.70
  -8   1  -6   16.10    2.00
  -8   1  -6    9.90    1.80
  -8  -1  -6    9.30    1.60
   8  -1   6    9.10    1.70
  -8   1  -7    0.20    1.60
   8   1   7   -0.20    1.70
  -8   1  -7    0.80    1.70
  -8  -1  -7   -1.20    1.50
   8  -1   7   -1.00    1.50
   8   1   8    0.20    1.80
  -8   1  -8   -0.80    1.70
   8  -1   8    1.70    1.60
  -8  -1  -8   -1.60    1.50
  -8   1  -9    1.20    1.90
   8   1   9   -0.20    1.90
  -8  -1  -9   -0.90    1.60
   8  -1   9   -0.30    1.60
   8   1  10   -0.80    2.00
  -8   1 -10   -3.00    1.90
   8  -1  10    0.40    1.80
  -8  -1 -10   -0.90    1.90
  -8   1 -11    6.30    2.30
   8   1  11   10.70    2.50
   8  -1  11    9.10    2.20
  -8  -1 -11   11.10    2.40
   8   1  12    1.10    2.30
  -8   1 -12   -0.10    2.40
  -8  -1 -12   -0.70    2.20
   8  -1  12   -2.00    2.00
  -8   2  14   14.90    3.40
   8   2 -14    7.30    3.20
  -8  -2  14    7.00    2.60
   8  -2 -14    3.30    3.00
  -8   2  13    2.90    3.00
   8   2 -13    3.40    2.90
  -8  -2  13    1.40    2.30
   8  -2 -13    2.00    2.70
  -8   2  12   12.60    3.00
   8   2 -12    9.10    2.80
   8  -2 -12   10.10    2.80
  -8  -2  12   10.00    2.50
   8   2 -11   -0.60    2.50
  -8   2  11    4.10    2.50
  -8  -2  11    1.80    2.10
   8  -2 -11    0.90    2.30
   8   2 -10   10.20    2.40
  -8   2  10    9.90    2.60
  -8  -2  10    7.60    2.20
   8  -2 -10    6.00    2.30
   8   2  -9  108.49    6.70
  -8   2   9  107.99    6.70
  -8  -2   9  113.99    6.60
   8  -2  -9  104.49    6.70
   8   2  -8   -0.10    1.80
  -8   2   8    0.00    1.80
   8  -2  -8   -0.50    1.90
  -8  -2   8    0.70    1.70
   8   2  -7   15.30    2.00
  -8   2   7   16.60    2.10
  -8  -2   7   13.80    1.90
   8  -2  -7   15.70    2.20
  -8  -2   7   19.30    2.00
   8   2  -6   39.10    3.20
  -8   2   6   39.60    3.20
  -8  -2   6   43.70    3.10
   8  -2  -6   36.80    3.30
   8  -2  -6   41.50    4.40
   8  -2  -6   43.10    3.30
  -8  -2   6   43.70    2.80
  -8   2   5   38.80    3.00
   8   2  -5   43.60    3.00
  -8  -2   5   43.70    2.70
   8  -2  -5   43.10    2.80
   8  -2  -5   39.70    3.50
   8  -2  -5   39.20    3.10
  -8  -2   5   43.40    3.00
   8   2  -4  491.55   25.80
   8   2  -4  569.14   25.90
  -8   2   4  518.65   25.90
  -8   2   4  468.95   25.80
  -8  -2   4  547.75   25.90
   8  -2  -4  519.35   25.80
  -8  -2   4  561.54   25.80
   8  -2  -4  539.05   26.20
   8  -2  -4  526.95   25.90
  -8   2   3  322.97   17.80
   8   2  -3  350.76   17.90
   8   2  -3  372.06   17.80
  -8   2   3  368.86   17.90
   8  -2  -3  337.97   17.80
  -8  -2   3  383.86   17.90
   8  -2  -3  373.46   18.10
  -8  -2   3  377.26   17.80
   8  -2  -3  369.56   17.90
  -8   2   2  390.06   20.40
   8   2  -2  409.16   20.40
  -8   2   2  433.66   20.40
   8   2  -2  366.66   20.30
   8  -2  -2  431.36   20.40
   8  -2  -2  422.46   20.50
  -8  -2   2  446.56   20.40
   8  -2  -2  405.26   20.40
  -8  -2   2  431.36   20.40
   8   2  -1   77.89    4.00
   8   2  -1   65.99    4.00
  -8   2   1   66.29    3.90
  -8   2   1   74.29    3.90
   8  -2  -1   79.09    3.90
   8  -2  -1   64.69    4.00
  -8  -2   1   64.89    3.90
   8  -2  -1   72.69    3.80
  -8  -2   1   78.59    3.90
  -8   2   0  220.08   10.40
  -8   2   0  215.58   10.40
   8   2   0  202.38   10.50
   8   2   0  216.98   10.50
   8  -2   0  200.78   10.40
  -8  -2   0  204.18   10.40
   8  -2   0  203.88   10.40
  -8  -2   0  205.68   10.40
  -8   2  -1  753.22   35.00
  -8   2  -1  687.53   34.90
   8   2   1  728.13   35.00
   8   2   1  663.83   35.00
   8   2   1  742.33   35.30
   8  -2   1  761.32   34.90
  -8  -2  -1  686.13   35.00
   8  -2   1  733.63   34.90
  -8  -2  -1  697.53   34.90
   8   2   2   32.40    2.40
   8   2   2   32.10    2.70
  -8   2  -2   28.10    2.10
  -8  -2  -2   28.00    2.10
   8  -2   2   28.10    2.10
  -8  -2  -2   27.00    2.10
  -8   2  -3  135.29    7.20
   8   2   3  137.79    7.30
   8   2   3  131.79    7.60
   8  -2   3  143.09    7.20
  -8  -2  -3  156.38    7.50
  -8  -2  -3  133.99    7.20
   8  -2   3  133.79    7.20
   8   2   4    5.60    1.40
   8   2   4   12.40    2.20
  -8   2  -4    6.40    1.30
  -8   2  -4    8.70    1.10
   8  -2   4    6.60    1.10
   8  -2   4    7.10    1.30
  -8  -2  -4    6.20    1.10
   8   2   5   95.99    5.50
  -8   2  -5   95.09    5.30
  -8   2  -5   87.69    5.00
   8   2   5   87.49    5.90
  -8  -2  -5   80.09    5.10
   8  -2   5   97.09    5.10
   8   2   6   27.90    2.70
  -8   2  -6   29.50    3.00
  -8   2  -6   30.10    2.70
   8   2   6   29.70    4.00
  -8  -2  -6   29.00    2.80
   8  -2   6   29.40    2.70
   8   2   7   -2.10    1.70
   8   2   7   -0.20    2.60
  -8   2  -7   -0.80    1.50
  -8   2  -7    0.40    1.60
  -8  -2  -7   -1.50    1.40
   8  -2   7   -1.80    1.30
  -8   2  -8    4.00    1.80
   8   2   8   -1.00    2.90
   8   2   8    3.20    2.00
   8  -2   8    3.70    1.50
  -8  -2  -8    2.30    1.60
  -8   2  -9    4.70    2.00
   8   2   9    5.70    2.20
  -8  -2  -9    2.30    1.80
   8  -2   9    3.90    1.70
  -8   2 -10    1.10    2.10
   8   2  10    0.50    2.10
  -8  -2 -10    1.00    1.80
   8  -2  10    0.50    1.70
  -8   2 -11   12.90    2.60
   8   2  11   16.50    2.90
  -8  -2 -11    6.90    2.30
   8  -2  11    9.90    2.20
   8   3 -14   -0.60    2.90
  -8   3  14    1.00    3.10
   8  -3 -14    1.70    2.80
  -8  -3  14    4.00    2.20
   8   3 -13    1.30    2.70
  -8   3  13    2.00    3.00
   8  -3 -13   -0.10    2.50
  -8  -3  13    1.30    2.10
  -8   3  12   19.50    3.30
   8   3 -12   19.00    3.20
  -8  -3  12   17.50    2.60
   8  -3 -12   21.00    3.00
   8   3 -11    7.10    2.50
  -8   3  11    7.80    2.60
  -8  -3  11    4.90    2.00
   8  -3 -11    3.30    2.30
  -8   3  10   15.70    2.70
   8   3 -10   16.50    2.60
   8  -3 -10   14.00    2.50
  -8  -3  10   15.20    2.20
   8   3  -9    1.00    2.00
  -8   3   9    3.20    2.20
   8  -3  -9   -1.80    1.90
  -8  -3   9   -1.60    1.70
  -8   3   8    3.50    1.90
   8   3  -8    8.20    1.90
  -8  -3   8    5.90    1.80
  -8  -3   8    5.50    1.50
   8  -3  -8    6.00    1.90
  -8   3   7    2.20    1.60
   8   3  -7   -1.90    1.50
  -8  -3   7    0.70    1.00
  -8  -3   7   -2.00    1.40
   8  -3  -7    2.50    1.70
  -8   3   6    2.50    1.40
   8   3  -6    4.20    1.40
   8  -3  -6    2.30    1.10
   8  -3  -6    1.90    1.50
  -8  -3   6    2.50    0.90
  -8  -3   6    3.90    1.40
  -8   3   5  102.09    5.50
   8   3  -5   98.39    5.40
  -8  -3   5   97.09    5.40
   8  -3  -5   92.49    5.80
  -8  -3   5   99.19    5.10
   8  -3  -5   89.89    5.50
   8  -3  -5   99.29    5.20
  -8   3   4    1.40    1.10
   8   3  -4    3.30    1.00
   8   3  -4    1.60    1.20
   8  -3  -4    2.00    1.50
   8  -3  -4    3.50    0.90
  -8  -3   4    3.80    1.10
   8  -3  -4    2.80    1.30
  -8  -3   4    4.30    0.80
   8   3  -3    2.00    0.90
   8   3  -3    0.20    0.80
  -8   3   3    1.00    0.90
  -8   3   3    1.20    0.90
   8  -3  -3    1.90    1.20
  -8  -3   3    2.90    1.00
   8  -3  -3    0.40    1.10
   8  -3  -3    0.90    0.70
  -8  -3   3    1.30    0.70
   8   3  -2    4.20    0.90
   8   3  -2    6.00    0.90
  -8   3   2    7.40    1.00
  -8   3   2    5.30    0.90
  -8  -3   2    5.00    1.00
   8  -3  -2    6.90    1.10
  -8  -3   2    5.00    0.80
   8  -3  -2    5.20    1.20
   8  -3  -2    6.10    0.80
  -8   3   1   29.70    2.00
   8   3  -1   29.40    2.00
  -8   3   1   26.70    2.00
   8   3  -1   29.80    2.10
   8  -3  -1   28.70    2.10
   8  -3  -1   29.00    1.80
  -8  -3   1   28.00    1.90
  -8  -3   1   26.80    2.00
   8   3   0    0.70    0.80
  -8   3   0    0.60    0.70
  -8   3   0    1.10    0.70
   8   3   0    0.70    0.70
  -8  -3   0    0.90    0.70
   8  -3   0    0.80    0.60
   8  -3   0    0.70    0.90
  -8  -3   0    1.90    0.80
   8   3   1    2.20    1.40
   8   3   1    1.50    0.90
  -8   3  -1    1.20    0.70
  -8   3  -1    1.00    0.70
   8  -3   1    0.70    0.80
  -8  -3  -1    1.10    0.80
  -8  -3  -1    0.60    0.70
   8   3   2   -0.30    0.90
  -8   3  -2    0.40    0.80
   8   3   2   -0.40    1.60
   8  -3   2    0.00    0.80
  -8  -3  -2   -0.20    0.70
   8  -3   2    0.40    0.80
  -8  -3  -2    0.80    0.90
   8   3   3   10.90    1.50
  -8   3  -3    9.30    1.20
   8   3   3   12.40    2.20
  -8  -3  -3    9.10    1.30
   8  -3   3   11.00    1.20
  -8  -3  -3    6.80    1.10
   8  -3   3   12.20    1.30
   8   3   4   18.90    2.00
  -8   3  -4   26.00    2.40
   8   3   4   22.10    3.00
  -8   3  -4   19.20    1.60
   8  -3   4   24.90    2.20
  -8  -3  -4   21.40    2.20
   8  -3   4   24.10    2.30
  -8   3  -5  331.97   16.40
  -8   3  -5  312.47   16.10
   8   3   5  318.37   16.50
   8   3   5  323.27   17.10
  -8  -3  -5  327.17   16.30
   8  -3   5  339.47   16.30
   8  -3   5  325.37   16.20
   8   3   6    0.80    2.50
  -8   3  -6    0.40    1.40
  -8   3  -6   -1.70    1.40
   8   3   6    0.40    1.60
   8  -3   6   -0.50    1.10
  -8  -3  -6    1.60    1.30
   8   3   7    3.10    1.80
   8   3   7    4.50    2.90
  -8   3  -7    3.20    1.60
  -8  -3  -7    5.30    1.50
   8  -3   7    5.00    1.40
   8   3   8   44.20    5.10
  -8   3  -8   40.30    3.90
   8   3   8   45.30    4.20
   8  -3   8   39.50    3.40
  -8  -3  -8   41.30    3.70
   8   3   9    1.60    2.20
   8   3   9    2.30    3.40
  -8   3  -9    0.40    1.90
   8  -3   9    2.30    1.50
  -8  -3  -9    2.60    1.80
   8   3  10    0.40    2.20
  -8   3 -10    2.70    2.20
  -8  -3 -10    0.70    1.90
   8  -3  10    1.70    1.60
  -8   3 -11    1.10    2.40
   8   3  11    1.70    2.40
  -8  -3 -11    1.40    2.10
   8  -3  11    0.20    1.70
  -8   4  13    4.40    3.30
   8   4 -13    4.20    2.90
   8  -4 -13   -2.00    2.40
  -8  -4  13    2.40    1.80
  -8   4  12    1.90    2.80
   8   4 -12    2.60    2.60
   8  -4 -12    0.00    2.30
  -8  -4  12    2.60    1.80
  -8   4  11    7.70    2.70
   8   4 -11    7.50    2.60
  -8  -4  11    8.10    1.90
   8  -4 -11    5.60    2.30
  -8   4  10    5.80    2.50
   8   4 -10    6.00    2.30
  -8  -4  10    5.70    1.70
   8  -4 -10    5.60    2.10
  -8   4   9   13.20    2.60
   8   4  -9   12.20    2.30
   8  -4  -9   10.00    2.10
  -8  -4   9   12.10    1.80
   8   4  -8   -0.50    1.70
  -8   4   8    1.10    1.90
  -8  -4   8   -1.10    1.30
  -8  -4   8   -0.70    0.80
   8  -4  -8   -0.10    1.60
   8   4  -7  143.99    7.90
  -8   4   7  140.99    7.90
  -8  -4   7  145.89    7.60
   8  -4  -7  142.09    7.80
   8  -4  -7  144.49    7.90
  -8  -4   7  137.29    7.30
  -8   4   6  727.93   34.70
   8   4  -6  723.13   34.60
  -8  -4   6  716.63   34.40
   8  -4  -6  656.03   34.40
  -8  -4   6  653.83   34.30
   8  -4  -6  752.72   34.60
   8   4  -5   12.50    1.60
  -8   4   5   12.90    1.70
   8  -4  -5   16.60    2.40
  -8  -4   5   11.70    1.40
   8  -4  -5   12.60    1.60
   8  -4  -5   10.90    1.20
  -8  -4   5   15.00    1.40
  -8   4   4    3.80    1.20
   8   4  -4    4.50    1.10
   8  -4  -4    4.70    0.80
   8  -4  -4    7.30    1.60
  -8  -4   4    5.10    1.10
   8  -4  -4    2.50    1.20
  -8  -4   4    3.70    0.70
   8   4  -3   72.69    4.00
  -8   4   3   65.49    4.10
   8   4  -3   78.09    4.30
   8  -4  -3   72.69    3.80
  -8  -4   3   71.29    4.00
  -8  -4   3   73.39    3.80
   8  -4  -3   71.69    4.10
   8  -4  -3   69.19    4.20
   8   4  -2   18.90    1.80
  -8   4   2   24.60    1.90
   8   4  -2   25.10    1.80
  -8   4   2   20.30    1.80
  -8  -4   2   20.90    1.50
   8  -4  -2   21.70    1.50
  -8  -4   2   20.10    1.90
   8  -4  -2   18.40    1.90
   8  -4  -2   20.70    1.80
  -8   4   1   -0.60    0.70
  -8   4   1    0.10    0.70
   8   4  -1    1.10    0.80
   8   4  -1    0.10    0.70
  -8  -4   1   -0.40    0.60
   8  -4  -1   -0.90    0.80
   8  -4  -1    0.70    0.50
  -8  -4   1   -1.10    0.80
  -8   4   0    4.90    0.90
  -8   4   0    4.80    0.80
   8   4   0    4.00    0.90
  -8  -4   0    5.90    0.90
   8  -4   0    5.60    0.90
  -8  -4   0    6.50    0.90
   8   4   1    8.30    1.20
   8   4   1   13.00    2.20
  -8   4  -1   10.10    1.10
   8  -4   1   11.60    1.10
  -8  -4  -1   11.50    1.20
  -8  -4  -1   11.10    1.10
   8  -4   1   13.70    1.30
   8   4   2   10.90    2.50
   8   4   2    6.00    1.20
  -8   4  -2    7.30    1.10
   8  -4   2    9.40    1.00
  -8  -4  -2    8.60    1.10
   8  -4   2   10.10    1.10
  -8  -4  -2   12.40    1.30
  -8   4  -3    1.60    1.00
   8   4   3   -2.10    2.10
   8   4   3    1.30    1.20
  -8  -4  -3    1.50    0.90
  -8  -4  -3    2.80    1.10
   8  -4   3    3.00    0.90
   8  -4   3    2.60    0.90
   8   4   4  346.57   18.40
   8   4   4  363.86   19.10
  -8   4  -4  357.66   17.90
  -8   4  -4  369.66   18.20
   8  -4   4  370.76   18.00
   8  -4   4  384.76   18.10
  -8  -4  -4  355.56   18.20
  -8  -4  -4  384.16   18.80
   8   4   5   65.59    4.30
  -8   4  -5   57.09    3.60
  -8   4  -5   56.89    4.00
   8   4   5   58.29    5.20
   8  -4   5   58.29    3.60
   8  -4   5   65.49    3.80
  -8  -4  -5   58.49    3.80
  -8   4  -6   12.40    1.90
   8   4   6   19.40    3.60
   8   4   6   13.50    2.10
   8  -4   6   13.40    2.30
  -8  -4  -6   16.20    1.70
   8  -4   6   14.90    1.60
   8   4   7   26.50    2.90
  -8   4  -7   33.70    3.30
   8   4   7   35.90    4.80
  -8  -4  -7   33.10    3.00
   8  -4   7   28.70    2.70
   8   4   8    5.30    2.20
   8   4   8    3.80    3.30
  -8   4  -8    2.30    1.80
   8  -4   8    2.30    1.30
  -8  -4  -8    3.40    1.60
   8   4   9    1.70    3.60
  -8   4  -9    3.70    2.00
   8   4   9    7.10    2.50
   8  -4   9    2.70    1.40
  -8  -4  -9    3.70    1.80
   8   4  10    7.00    4.40
  -8   4 -10    9.70    2.50
   8   4  10    9.50    2.70
   8  -4  10    9.30    1.80
  -8  -4 -10   13.30    2.20
   8   4  11    2.40    2.50
  -8   4 -11    0.40    2.40
   8  -4  11    2.80    1.70
  -8  -4 -11    0.60    2.00
  -8   5  13    2.90    3.20
   8   5 -13    0.80    2.90
   8  -5 -13    0.70    2.30
  -8   5  12    6.20    3.00
   8   5 -12    3.60    2.70
   8  -5 -12    1.70    2.20
  -8   5  11    2.50    2.70
   8   5 -11    0.70    2.50
  -8  -5  11    4.70    1.30
   8  -5 -11    1.60    2.10
  -8   5  10    4.60    2.50
   8   5 -10    2.00    2.20
   8  -5 -10    4.30    1.90
  -8  -5  10    2.90    1.20
  -8   5   9   20.40    2.90
   8   5  -9   23.10    2.60
  -8  -5   9   15.60    1.60
   8  -5  -9   19.20    2.30
   8   5  -8   23.00    2.50
  -8   5   8   22.50    2.70
  -8  -5   8   24.20    2.20
   8  -5  -8   22.90    2.30
  -8   5   7   25.90    2.70
   8   5  -7   29.10    2.60
   8  -5  -7   30.80    2.40
  -8  -5   7   30.20    2.20
   8  -5  -7   30.20    3.00
  -8  -5   7   28.50    1.90
  -8   5   6    5.50    1.70
   8   5  -6    4.40    1.50
   8  -5  -6    3.50    0.90
  -8  -5   6    3.30    0.60
   8  -5  -6    4.80    1.30
  -8  -5   6    3.10    0.90
  -8   5   5  115.89    6.30
   8   5  -5  114.89    6.10
   8  -5  -5  106.19    5.70
  -8  -5   5  107.39    5.50
  -8  -5   5  108.89    5.60
   8  -5  -5  113.29    5.90
  -8   5   4    1.10    1.20
  -8   5   4    0.50    2.40
   8   5  -4    2.20    1.00
   8  -5  -4    2.20    0.60
  -8  -5   4    2.20    0.50
  -8  -5   4    1.70    0.70
   8  -5  -4    1.70    1.00
   8  -5  -4    2.70    1.60
  -8   5   3   55.29    3.60
   8   5  -3   61.29    3.50
  -8   5   3   62.69    4.50
  -8  -5   3   60.49    3.20
   8  -5  -3   55.49    3.30
   8  -5  -3   55.99    3.10
   8  -5  -3   62.69    3.80
  -8  -5   3   57.19    3.00
  -8   5   2  138.79    7.60
   8   5  -2  136.49    7.10
  -8   5   2  137.49    7.10
  -8  -5   2  137.39    6.80
  -8  -5   2  138.49    6.80
   8  -5  -2  133.49    6.80
  -8   5   1    3.70    1.60
  -8   5   1    2.50    0.80
   8   5  -1    1.60    0.80
  -8  -5   1    0.30    0.70
  -8  -5   1    0.40    0.70
  -8   5   0   20.90    1.80
   8   5   0   19.80    2.00
  -8   5   0   25.00    2.20
  -8  -5   0   23.00    1.80
  -8  -5   0   21.50    1.70
   8   5   1   -1.50    2.10
  -8   5  -1    0.00    0.80
   8   5   1    0.20    1.00
  -8   5  -1    0.10    1.10
  -8  -5  -1    0.30    0.80
  -8  -5  -1   -0.60    0.70
   8   5   2   12.10    2.70
  -8   5  -2   10.80    1.30
  -8   5  -2   14.90    1.50
   8   5   2   10.80    1.50
  -8  -5  -2   14.10    1.30
  -8  -5  -2   15.10    1.40
   8   5   3    9.20    3.00
  -8   5  -3    6.50    1.20
   8   5   3    8.80    1.50
  -8   5  -3   10.20    1.30
  -8  -5  -3    9.90    1.30
   8  -5   3    8.00    0.80
  -8  -5  -3    7.50    1.10
   8  -5   3    7.60    0.70
   8   5   4  295.57   16.30
   8   5   4  320.57   15.50
  -8   5  -4  298.87   15.30
   8  -5   4  296.57   14.90
   8  -5   4  305.17   14.90
  -8  -5  -4  310.57   15.30
  -8  -5  -4  303.37   15.10
  -8   5  -5    6.10    1.50
   8   5   5    9.40    3.20
   8   5   5    5.80    1.80
   8  -5   5    7.30    1.00
  -8  -5  -5    8.00    1.30
  -8   5  -6    9.60    1.80
   8   5   6   14.90    2.30
   8   5   6   17.30    3.60
   8  -5   6   12.30    1.20
  -8  -5  -6   11.10    1.60
  -8   5  -7    5.20    1.70
   8   5   7    5.90    3.30
   8   5   7    3.50    2.10
   8  -5   7    3.90    1.00
  -8  -5  -7    5.20    1.40
   8   5   8    0.10    3.30
   8   5   8    0.70    2.20
  -8   5  -8    2.60    1.80
   8  -5   8    0.70    1.00
  -8  -5  -8   -0.50    1.40
   8   5   9    2.50    3.60
   8   5   9    4.60    2.60
  -8   5  -9    2.10    2.10
  -8  -5  -9    1.10    1.60
   8   5  10   -4.00    4.10
  -8   5 -10   -5.60    2.10
   8   5  10   -1.40    2.50
  -8  -5 -10   -2.00    1.70
  -8   6  12   20.60    3.60
   8   6 -12   12.60    3.10
   8  -6 -12   12.00    2.30
  -8   6  11    2.20    2.70
   8   6 -11    1.00    2.50
   8  -6 -11    3.20    1.80
  -8   6  10    2.00    2.50
   8   6 -10    0.30    2.20
   8  -6 -10   -0.60    1.60
  -8   6   9    0.70    2.20
   8   6  -9    1.00    2.00
   8  -6  -9   -2.30    1.30
   8   6  -8   -1.50    1.70
  -8   6   8    0.60    2.00
   8  -6  -8    0.80    1.20
  -8   6   7   13.70    2.30
   8   6  -7   14.10    2.00
   8  -6  -7   13.40    1.50
  -8   6   6    7.30    3.20
  -8   6   6    4.90    1.80
   8   6  -6    4.10    1.50
   8  -6  -6    4.30    1.00
  -8   6   5   64.79    4.30
  -8   6   5   68.29    5.70
   8   6  -5   67.29    4.10
   8  -6  -5   60.59    3.30
   8  -6  -5   63.79    3.40
   8   6  -4    2.30    1.00
  -8   6   4   -0.30    2.50
  -8   6   4   -0.60    1.20
  -8   6   3  201.68   10.20
  -8   6   3  198.18   10.90
   8   6  -3  197.38   10.10
  -8   6   2   52.49    3.20
   8   6  -2   47.10    3.10
  -8   6   2   51.39    4.10
  -8   6   1    5.50    1.00
  -8   6   1    9.30    2.00
   8   6  -1    2.00    0.90
  -8   6   0    5.20    1.70
   8   6   0    2.30    1.00
   8   6   0    1.00    2.40
  -8   6   0    2.50    0.80
   8   6   1    0.10    1.00
  -8   6  -1    1.40    1.40
  -8   6  -1    0.50    0.80
   8   6   1    1.40    2.20
  -8   6  -2    2.60    0.90
   8   6   2    2.80    2.80
  -8   6  -2    6.60    1.50
   8   6   2    1.80    1.20
  -8  -6  -2    3.50    0.80
  -8  -6  -2    2.70    0.70
  -8   6  -3   10.10    1.50
  -8   6  -3    7.90    1.20
   8   6   3    5.60    1.50
   8   6   3    8.00    3.10
  -8  -6  -3    6.00    1.00
   8   6   4   14.10    3.40
   8   6   4    9.80    1.80
  -8   6  -4   10.00    1.40
  -8   6  -4   13.30    1.60
  -8  -6  -4    8.60    1.20
   8   6   5    1.90    1.70
   8   6   5    6.00    3.30
  -8   6  -5    3.90    1.40
  -8  -6  -5    4.10    1.00
   8   6   6    2.00    2.90
  -8   6  -6   -1.20    1.40
   8   6   6   -0.80    1.80
  -8  -6  -6    1.40    1.00
   8   6   7    5.90    3.60
  -8   6  -7    2.30    1.60
   8   6   7    3.80    2.10
  -8  -6  -7    0.50    1.20
   8   6   8   -2.20    2.20
  -8   6  -8   -4.00    1.80
   8   6   8    4.50    3.80
  -8  -6  -8   -1.40    1.30
   8   6   9    1.00    2.50
  -8   6  -9    0.70    2.00
   8   6   9    2.90    4.10
  -8  -6  -9    0.40    1.50
  -8   7  11    1.30    2.80
  -8   7  10    1.60    2.60
   8   7  -9   10.30    2.40
  -8   7   9    8.10    2.60
   8   7  -8    1.50    1.80
  -8   7   8    0.50    2.10
  -8   7   7    0.00    1.90
   8   7  -7    1.20    1.60
   8   7  -6    0.10    1.40
  -8   7   6   -3.10    3.10
  -8   7   6   -1.10    1.60
  -8   7   5   15.70    3.50
   8   7  -5   13.20    1.70
  -8   7   5   12.00    1.90
  -8   7   4    5.20    2.80
  -8   7   4    3.40    1.40
   8   7  -4    5.40    1.20
  -8   7   3    7.80    2.60
   8   7  -3    8.70    1.20
  -8   7   3    8.50    1.40
   8   7  -2    3.20    0.90
  -8   7   2    4.10    2.20
  -8   7   2    4.10    1.10
  -8   7   1    3.80    2.00
   8   7  -1    0.30    0.80
  -8   7   1    0.00    0.90
   8   7   0    5.80    1.10
   8   7   0    9.40    2.80
  -8   7   0   11.00    2.10
  -8   7   0    5.60    1.00
   8   7   1    0.50    1.00
   8   7   1    2.00    2.70
  -8   7  -1    2.80    1.70
  -8   7  -1   -0.30    0.80
   8   7   2   28.20    3.90
   8   7   2   19.30    1.90
  -8   7  -2   23.30    2.10
   8   7   3   -1.00    1.20
   8   7   3    0.10    2.80
  -8   7  -3   -0.40    0.90
   8   7   4    6.40    2.90
  -8   7  -4    4.60    1.20
   8   7   4    2.10    1.50
  -8   7  -5   -1.50    1.20
   8   7   5    2.30    3.30
   8   7   5   -3.00    1.70
   8   7   6    0.10    3.50
   8   7   6   -1.90    1.90
   8   7   7    9.50    4.20
   8   7   7    8.70    2.40
   8   7   8    1.60    3.90
   8   7   8    2.40    2.40
  -8   8   9    4.10    2.60
  -8   8   8   14.20    2.70
  -8   8   7    4.20    4.00
  -8   8   7    6.30    2.20
  -8   8   6    7.10    2.10
  -8   8   6    6.40    3.90
  -8   8   5    2.70    3.30
  -8   8   5    3.30    1.80
  -8   8   4   19.80    3.70
  -8   8   4   22.00    3.20
  -8   8   3   -0.20    2.60
  -8   8   2    0.10    2.30
  -8   8   1    4.40    2.20
   8   8  -1    0.60    2.60
  -8   8   0    5.40    2.10
   8   8   0   -0.50    2.70
   8   8   0    0.20    0.90
   8   8   1    2.40    1.10
   8   8   1    4.00    3.10
   8   8   2    1.20    2.80
   8   8   2    0.50    1.20
   8   8   3    1.60    1.30
   8   8   3    8.00    3.50
   8   8   4   -2.20    1.40
   8   8   4    1.10    3.20
   8   8   5    5.60    3.50
   8   8   5    1.70    1.70
   8   8   6    1.60    1.90
   8   8   6    6.50    3.90
  -8   9   7   -4.30    4.00
  -8   9   6   -2.80    3.80
  -8   9   5   20.70    4.40
  -8   9   4   24.10    4.30
  -8   9   3    3.60    3.10
   8   9  -2    7.70    3.50
  -8   9   2    5.30    2.90
   8   9  -1    3.60    3.30
   8   9   0    8.50    3.60
   8   9   1    1.70    3.30
   8   9   2    1.90    3.10
   8   9   3    3.10    3.60
   8   9   4    7.00    3.80
   8  10  -2    6.40    3.60
   8  10  -1   19.10    4.50
   9   0 -14   20.50    3.60
  -9   0  14   23.90    3.60
   9   0 -13   -2.30    2.80
  -9   0  13    2.60    2.80
   9   0 -12    5.00    2.80
  -9   0  12    6.00    2.60
  -9   0  11   -2.30    2.30
   9   0 -11   -5.40    2.20
   9   0 -10    0.70    2.10
  -9   0  10    2.00    2.20
   9   0  -9   -1.60    2.00
  -9   0   9   -1.20    1.90
   9   0  -8   24.20    2.60
  -9   0   8   25.90    2.60
  -9   0   7   -1.90    1.50
   9   0  -7   -2.80    1.60
  -9   0   6  201.08   11.50
   9   0  -6  250.07   11.70
   9   0  -5    0.40    1.30
  -9   0   5    0.20    1.20
  -9   0   4   39.80    2.70
  -9   0   4   43.40    2.80
   9   0  -4   34.90    2.90
   9   0  -4   40.10    2.60
  -9   0   3   -0.90    0.90
   9   0  -3    0.20    0.80
  -9   0   3   -0.40    0.80
   9   0  -3    1.10    1.00
  -9   0   2   31.40    2.20
   9   0  -2   31.20    2.20
   9   0  -2   29.50    2.30
  -9   0   2   30.00    2.20
   9   0  -1   -1.00    0.90
  -9   0   1   -0.10    0.70
  -9   0   1   -1.00    0.80
   9   0  -1    0.40    0.80
  -9   0   0   38.80    2.40
   9   0   0   33.20    2.40
  -9   0   0   34.60    2.40
   9   0   0   36.10    2.40
   9   0   1   -0.60    0.70
   9   0   1    0.20    0.90
   9   0   1    0.10    0.90
  -9   0  -1   -0.40    0.70
  -9   0  -1   -0.20    0.80
   9   0   2   27.50    2.20
   9   0   2   30.20    2.20
  -9   0  -2   29.40    2.20
   9   0   3    1.00    1.00
  -9   0  -3    0.20    0.90
   9   0   3    0.40    1.20
  -9   0  -4   49.40    3.40
   9   0   4   55.39    3.50
   9   0   4   51.89    3.70
  -9   0  -5    0.30    1.20
   9   0   5   -1.50    1.20
  -9   0  -5    0.40    1.20
   9   0   6   11.70    1.80
  -9   0  -6   12.40    1.80
  -9   0  -6   19.00    2.40
   9   0   7    0.00    1.50
  -9   0  -7    0.70    1.60
  -9   0  -8   -1.20    1.60
   9   0   8    0.60    1.60
   9   0   9    0.50    1.80
  -9   0  -9   -3.10    1.70
  -9   0 -10    5.00    2.00
   9   0  10    2.90    2.10
   9   0  11   -1.80    2.10
  -9   0 -11    0.20    2.00
  -9   1  14    8.40    3.10
   9   1 -14    8.40    3.40
   9  -1 -14   15.00    3.40
  -9  -1  14    9.90    2.90
   9   1 -13    5.70    3.10
  -9   1  13    9.10    2.90
  -9  -1  13   12.90    2.80
   9  -1 -13    1.20    2.80
   9   1 -12   29.30    3.50
  -9   1  12   38.90    3.90
   9  -1 -12   27.90    3.60
  -9  -1  12   26.00    3.30
   9   1 -11    8.50    2.70
  -9   1  11    1.70    2.50
  -9  -1  11    3.80    2.40
   9  -1 -11    0.60    2.40
   9   1 -10   14.40    2.70
  -9   1  10   23.50    3.00
  -9  -1  10   17.30    2.70
   9  -1 -10   13.80    2.70
  -9   1   9   10.50    2.20
   9   1  -9   16.00    2.50
   9  -1  -9   11.50    2.30
  -9  -1   9   14.30    2.30
  -9   1   8   44.90    3.80
   9   1  -8   39.30    3.80
  -9  -1   8   40.30    3.60
   9  -1  -8   40.30    3.90
  -9   1   7   12.00    1.90
   9   1  -7   17.20    2.10
   9  -1  -7   18.40    2.20
  -9  -1   7   18.20    2.10
   9   1  -6   13.20    1.80
  -9   1   6    9.60    1.60
  -9  -1   6   15.30    1.70
   9  -1  -6   14.20    1.90
   9   1  -5   56.49    3.70
  -9   1   5   56.89    3.70
   9  -1  -5   55.79    3.80
  -9  -1   5   61.19    3.80
  -9  -1   5   59.39    3.50
   9   1  -4   51.09    3.40
  -9   1   4   59.09    3.50
  -9  -1   4   54.99    3.40
   9  -1  -4   58.49    3.20
   9  -1  -4   52.29    3.50
  -9  -1   4   47.10    3.20
  -9   1   3   30.90    2.20
  -9   1   3   28.40    2.30
   9   1  -3   27.90    2.30
  -9  -1   3   27.50    2.30
  -9  -1   3   30.60    2.10
   9  -1  -3   27.70    2.40
   9  -1  -3   27.10    2.10
  -9   1   2  292.57   14.60
   9   1  -2  263.97   14.50
   9   1  -2  254.67   14.60
  -9   1   2  310.37   14.60
  -9  -1   2  293.87   14.60
  -9  -1   2  319.07   14.60
   9  -1  -2  305.27   14.60
   9  -1  -2  312.97   14.60
   9   1  -1   17.70    1.70
  -9   1   1   16.40    1.70
   9   1  -1   17.70    1.80
  -9   1   1   19.40    1.70
  -9  -1   1   18.30    1.70
  -9  -1   1   16.60    1.60
   9  -1  -1   19.40    1.60
   9  -1  -1   16.50    1.60
   9   1   0   39.80    2.70
  -9   1   0   46.20    2.80
   9   1   0   46.30    2.90
  -9   1   0   47.40    2.80
   9  -1   0   44.00    2.80
  -9  -1   0   48.00    2.80
  -9  -1   0   40.50    2.70
   9  -1   0   47.60    2.70
   9   1   1   15.80    1.80
   9   1   1   15.80    1.40
  -9   1  -1   11.60    1.20
  -9  -1  -1   15.40    1.40
   9  -1   1   15.80    1.60
   9  -1   1   14.40    1.10
  -9  -1  -1   15.30    1.50
   9  -1   1   12.40    1.30
   9   1   2  123.89    6.60
  -9   1  -2  130.19    6.40
   9   1   2  105.99    6.30
  -9  -1  -2  113.59    6.30
   9  -1   2  126.39    6.40
   9  -1   2  122.99    6.30
  -9   1  -3  142.89    7.30
   9   1   3  125.39    7.30
   9   1   3  142.39    7.60
   9  -1   3  145.19    7.30
  -9  -1  -3  140.49    7.30
   9   1   4    1.70    1.30
  -9   1  -4    0.70    1.10
   9   1   4    2.70    1.70
   9  -1   4    1.10    1.10
  -9  -1  -4    1.40    1.00
   9   1   5    0.20    2.00
   9   1   5   -0.10    1.30
  -9   1  -5    2.30    1.20
  -9   1  -5   -1.50    1.20
   9  -1   5   -0.20    1.20
  -9  -1  -5   -0.10    1.20
  -9   1  -6   20.00    2.20
   9   1   6   27.40    3.60
   9   1   6   23.90    2.40
  -9   1  -6   24.60    2.40
  -9  -1  -6   17.40    2.00
   9  -1   6   16.60    2.00
  -9   1  -7   47.40    3.90
  -9   1  -7   51.59    3.90
   9   1   7   46.70    4.10
  -9  -1  -7   46.80    3.80
   9  -1   7   46.90    3.70
  -9   1  -8    4.40    1.80
   9   1   8    2.70    1.80
  -9  -1  -8    1.70    1.60
   9  -1   8    3.30    1.60
  -9   1  -9    0.20    1.80
   9   1   9   -0.50    1.90
  -9  -1  -9    0.20    1.70
   9  -1   9    1.20    1.70
  -9   1 -10    2.90    2.00
   9   1  10    3.70    2.20
   9  -1  10    1.70    1.90
  -9  -1 -10    1.90    2.00
   9   1  11    5.70    2.30
  -9   1 -11    0.60    2.20
   9  -1  11    2.80    2.10
  -9  -1 -11    4.60    2.20
   9   2 -14   -1.10    3.10
  -9   2  14    0.00    3.10
   9  -2 -14   -1.30    2.90
  -9  -2  14    1.30    2.40
  -9   2  13    3.70    2.90
   9   2 -13    2.50    2.90
  -9  -2  13    1.20    2.40
   9  -2 -13   -0.20    2.80
   9   2 -12   53.69    5.20
  -9   2  12   50.29    5.10
   9  -2 -12   38.30    4.00
  -9  -2  12   56.69    4.90
   9   2 -11   -1.40    2.40
  -9   2  11   -0.10    2.30
  -9  -2  11   -0.10    2.20
   9  -2 -11   -3.20    2.30
   9   2 -10   52.49    4.70
  -9   2  10   40.60    3.90
  -9  -2  10   53.29    4.30
   9  -2 -10   50.89    4.60
  -9   2   9   -2.80    1.90
   9   2  -9   -1.40    2.00
  -9  -2   9   -2.10    1.90
   9  -2  -9   -3.90    2.00
   9   2  -8   -0.70    1.80
  -9   2   8   -2.40    1.80
  -9  -2   8   -1.50    1.70
   9  -2  -8   -0.60    1.90
   9   2  -7   59.79    4.40
  -9   2   7   59.09    4.20
   9  -2  -7   53.09    4.30
  -9  -2   7   59.09    4.00
  -9   2   6   59.09    4.00
   9   2  -6   60.59    4.00
  -9  -2   6   58.79    3.60
   9  -2  -6   61.39    4.10
  -9  -2   6   61.49    4.00
   9   2  -5  399.06   20.20
  -9   2   5  364.46   20.10
   9  -2  -5  383.16   20.00
  -9  -2   5  413.96   20.20
   9  -2  -5  432.36   20.60
   9  -2  -5  411.16   20.20
  -9  -2   5  439.66   20.00
   9   2  -4  369.76   18.70
  -9   2   4  379.56   18.70
  -9  -2   4  359.16   18.70
   9  -2  -4  403.66   18.60
   9  -2  -4  364.36   18.70
   9  -2  -4  370.26   18.90
  -9  -2   4  391.06   18.60
   9   2  -3   56.99    3.60
   9   2  -3   63.79    3.80
  -9   2   3   68.29    4.60
  -9   2   3   61.69    3.60
   9  -2  -3   57.19    3.70
   9  -2  -3   57.69    3.80
  -9  -2   3   65.89    3.50
   9  -2  -3   57.29    3.50
  -9  -2   3   61.19    3.60
   9   2  -2   -0.30    0.80
   9   2  -2   -1.70    0.90
  -9   2   2   -0.80    0.80
  -9   2   2   -0.90    0.80
  -9  -2   2    0.60    0.90
  -9  -2   2   -0.20    0.70
   9  -2  -2   -1.30    1.00
   9  -2  -2    0.80    1.00
   9  -2  -2    0.00    0.70
  -9   2   1    6.20    1.00
   9   2  -1    4.50    1.00
  -9   2   1    4.50    0.90
   9   2  -1    6.60    1.00
   9  -2  -1    4.40    0.80
  -9  -2   1    3.80    0.90
   9  -2  -1    6.90    0.80
  -9  -2   1    6.40    0.90
   9  -2  -1    4.50    1.10
  -9   2   0   41.50    2.70
  -9   2   0   39.10    2.50
   9  -2   0   39.10    2.70
   9  -2   0   40.20    2.50
  -9  -2   0   37.00    2.50
  -9  -2   0   41.70    2.60
   9   2   1   22.70    2.10
  -9   2  -1   26.60    2.00
   9   2   1   25.50    2.40
   9  -2   1   24.30    2.00
  -9  -2  -1   18.60    1.90
   9  -2   1   23.40    1.90
  -9  -2  -1   24.90    1.90
  -9   2  -2    1.70    0.80
   9   2   2    3.00    1.50
   9   2   2    0.10    1.00
  -9  -2  -2    2.30    1.00
  -9  -2  -2    1.50    0.90
   9  -2   2    2.00    1.00
   9   2   3    7.30    1.40
  -9   2  -3    3.50    1.10
   9   2   3    8.70    1.90
  -9  -2  -3    5.70    1.10
   9  -2   3    6.10    1.20
   9  -2   3    6.90    1.20
   9   2   4  243.78   12.00
   9   2   4  232.88   12.40
  -9   2  -4  241.78   11.90
   9  -2   4  243.58   11.80
  -9  -2  -4  205.38   11.80
   9   2   5   52.19    3.80
   9   2   5   51.79    4.30
  -9   2  -5   53.29    3.60
  -9   2  -5   44.50    3.00
  -9  -2  -5   45.20    3.40
   9  -2   5   52.09    3.40
   9   2   6   -0.30    2.30
  -9   2  -6    2.70    1.30
  -9   2  -6   -0.40    1.50
   9   2   6   -1.70    1.60
   9  -2   6   -1.20    1.30
  -9  -2  -6   -1.70    1.30
  -9   2  -7    4.70    1.70
   9   2   7    5.90    2.80
   9   2   7    4.20    1.80
  -9  -2  -7    5.10    1.50
   9  -2   7    5.80    1.60
   9   2   8   20.10    3.80
   9   2   8   13.40    2.30
  -9   2  -8   15.90    2.40
  -9  -2  -8   15.40    2.10
   9  -2   8   17.20    2.10
   9   2   9   -0.60    1.90
  -9   2  -9    1.30    1.90
  -9  -2  -9    1.50    1.80
   9  -2   9    0.70    1.60
  -9   2 -10    6.30    2.30
   9   2  10    4.80    2.30
   9  -2  10    5.70    1.90
  -9  -2 -10    4.40    2.10
  -9   2 -11    4.60    2.40
   9   2  11    7.00    2.60
  -9  -2 -11    0.00    2.00
   9  -2  11    3.90    2.00
  -9   3  14   -1.20    3.20
   9   3 -14   -4.80    2.90
   9  -3 -14    0.50    2.70
  -9  -3  14    1.00    2.20
  -9   3  13    2.80    3.10
   9   3 -13    1.40    2.80
   9  -3 -13    2.60    2.70
  -9  -3  13   -1.40    2.10
  -9   3  12    1.20    2.70
   9   3 -12    4.40    2.70
  -9  -3  12    5.50    2.20
   9  -3 -12    4.70    2.60
  -9   3  11    6.30    2.70
   9   3 -11    6.50    2.50
  -9  -3  11    7.00    2.10
   9  -3 -11    9.80    2.50
  -9   3  10    9.20    2.50
   9   3 -10   14.90    2.60
  -9  -3  10   15.90    2.30
   9  -3 -10   10.00    2.40
  -9   3   9   26.00    2.90
   9   3  -9   19.60    2.70
  -9  -3   9   29.60    2.70
   9  -3  -9   25.20    2.80
  -9   3   8   -0.80    1.80
   9   3  -8   -2.20    1.80
  -9  -3   8   -0.80    1.70
   9  -3  -8    0.00    1.80
   9   3  -7   17.00    2.20
  -9   3   7   15.00    2.10
  -9  -3   7   18.60    1.90
   9  -3  -7   21.00    2.30
  -9  -3   7   22.10    2.10
   9   3  -6   14.70    1.90
  -9   3   6   18.60    2.10
   9  -3  -6   15.40    2.00
   9  -3  -6   18.10    2.10
  -9  -3   6   19.70    1.90
  -9  -3   6   19.20    1.80
   9   3  -5   14.60    1.70
  -9   3   5   12.70    1.70
   9  -3  -5   15.10    1.80
  -9  -3   5   11.40    1.50
  -9  -3   5   12.50    1.20
   9  -3  -5   16.30    2.40
   9  -3  -5   15.60    1.40
  -9   3   4    1.40    1.10
   9   3  -4   -0.30    1.00
  -9  -3   4    0.70    0.70
   9  -3  -4    0.20    0.80
  -9  -3   4    0.20    1.10
   9  -3  -4    0.80    1.30
   9  -3  -4    2.30    1.40
  -9   3   3    0.80    1.00
   9   3  -3   -0.80    0.90
   9  -3  -3   -0.10    1.20
   9  -3  -3    4.40    1.20
  -9  -3   3    0.80    0.70
   9  -3  -3    1.00    0.80
  -9  -3   3   -0.50    1.00
   9   3  -2    2.30    0.90
  -9   3   2    3.80    0.90
  -9  -3   2    5.00    0.80
   9  -3  -2    4.50    1.00
   9  -3  -2    5.10    1.10
  -9  -3   2    4.60    1.00
   9  -3  -2    5.20    0.80
   9   3  -1  179.18    9.20
  -9   3   1  176.78    9.20
  -9  -3   1  190.58    9.20
   9  -3  -1  190.28    9.20
   9  -3  -1  178.98    9.10
  -9  -3   1  174.48    9.10
  -9   3   0   53.39    3.10
   9   3   0   47.40    3.20
  -9  -3   0   49.80    3.10
  -9  -3   0   53.29    3.10
   9  -3   0   53.89    3.20
   9  -3   0   53.89    3.00
   9   3   1   40.70    3.30
  -9   3  -1   37.60    2.60
   9   3   1   40.70    2.80
   9  -3   1   40.40    2.50
  -9  -3  -1   40.10    2.60
  -9  -3  -1   39.80    2.60
   9  -3   1   38.60    2.60
   9   3   2    6.60    1.20
   9   3   2    9.40    2.10
  -9   3  -2    8.20    1.10
   9  -3   2    8.30    1.20
  -9  -3  -2    9.60    1.10
   9  -3   2   11.40    1.20
  -9  -3  -2    8.30    1.20
   9   3   3   29.90    3.50
   9   3   3   33.10    2.80
  -9   3  -3   35.90    2.60
   9  -3   3   33.80    2.60
   9  -3   3   37.10    2.60
  -9  -3  -3   33.90    2.60
  -9   3  -4  418.16   21.80
   9   3   4  444.16   21.90
   9   3   4  430.16   22.40
   9  -3   4  446.26   21.70
   9  -3   4  468.35   21.80
  -9  -3  -4  430.56   21.70
  -9   3  -5    0.20    0.90
   9   3   5    1.70    2.30
   9   3   5   -0.80    1.50
  -9   3  -5    0.40    1.30
  -9  -3  -5    1.10    1.20
   9  -3   5   -0.50    1.20
   9   3   6    3.20    1.70
  -9   3  -6    2.80    1.50
   9   3   6    5.30    2.70
   9  -3   6    1.80    1.20
  -9  -3  -6    1.60    1.30
   9   3   7    7.60    3.00
   9   3   7    1.90    1.80
  -9   3  -7    4.90    1.80
  -9  -3  -7    1.90    1.50
   9  -3   7    4.70    1.40
   9   3   8    0.20    3.00
   9   3   8   -0.30    1.90
  -9   3  -8    1.60    1.80
   9  -3   8    0.80    1.40
  -9  -3  -8    0.10    1.50
   9   3   9   13.80    2.50
   9   3   9   10.50    3.80
  -9   3  -9   12.00    2.40
   9  -3   9    8.60    1.90
  -9  -3  -9   11.70    2.20
   9   3  10    6.50    2.50
  -9   3 -10    3.40    2.30
  -9  -3 -10    2.20    2.00
   9  -3  10    4.30    1.80
   9   3  11    5.40    2.50
  -9   3 -11    5.10    2.60
   9  -3  11    3.80    1.90
  -9  -3 -11    3.80    2.10
  -9   4  13   -4.00    2.90
   9   4 -13   -0.20    2.80
   9  -4 -13   -1.20    2.40
  -9  -4  13    2.60    1.90
  -9   4  12   -0.90    2.70
   9   4 -12    0.90    2.60
   9  -4 -12    0.50    2.40
  -9  -4  12    1.80    1.90
  -9   4  11    9.20    2.80
   9   4 -11    5.80    2.60
   9  -4 -11    6.20    2.30
  -9  -4  11    8.10    1.90
   9   4 -10   19.50    2.80
  -9   4  10   14.00    2.80
  -9  -4  10   19.40    2.20
   9  -4 -10   17.20    2.60
  -9   4   9    2.10    2.30
   9   4  -9    3.40    2.00
  -9  -4   9    2.70    1.60
   9  -4  -9   -0.70    1.90
  -9   4   8   31.30    3.00
   9   4  -8   35.00    3.40
  -9  -4   8   36.10    3.10
  -9  -4   8   27.70    2.40
   9  -4  -8   33.20    2.90
  -9   4   7   25.40    2.50
   9   4  -7   19.80    2.30
  -9  -4   7   20.60    1.90
   9  -4  -7   19.60    2.20
  -9  -4   7   23.80    2.10
  -9   4   6  565.34   26.90
   9   4  -6  522.55   26.80
  -9  -4   6  520.55   26.50
   9  -4  -6  552.54   26.60
   9  -4  -6  542.75   26.80
  -9  -4   6  549.54   26.70
  -9   4   5   67.39    4.20
   9   4  -5   59.39    4.10
   9  -4  -5   67.19    4.30
  -9  -4   5   66.39    3.60
  -9  -4   5   61.49    4.00
   9  -4  -5   60.59    3.70
   9  -4  -5   64.79    4.50
  -9   4   4    0.30    1.20
   9   4  -4    2.00    1.10
   9  -4  -4    2.40    1.50
  -9  -4   4    1.30    0.70
   9  -4  -4    0.50    1.20
  -9  -4   4    0.80    1.10
   9  -4  -4    1.40    0.80
  -9   4   3   -0.20    1.00
   9   4  -3   -1.00    0.90
   9  -4  -3   -0.80    0.60
   9  -4  -3   -1.00    1.10
   9  -4  -3   -0.20    1.10
  -9  -4   3    0.10    1.00
  -9  -4   3    0.20    0.60
  -9   4   2   26.90    2.20
   9   4  -2   27.30    2.20
   9  -4  -2   29.00    2.10
  -9  -4   2   28.30    1.90
   9  -4  -2   27.10    2.30
  -9  -4   2   28.10    2.20
   9  -4  -2   28.70    1.80
  -9   4   1    6.90    1.00
   9   4  -1    5.20    1.00
   9  -4  -1    6.50    0.80
  -9  -4   1    6.80    0.90
  -9  -4   1    5.20    1.00
   9  -4  -1    5.50    1.10
  -9   4   0   -0.20    0.70
   9   4   0   -0.40    0.80
   9  -4   0   -1.40    0.90
  -9  -4   0   -0.20    0.70
  -9  -4   0   -0.70    0.80
   9   4   1   -0.20    1.90
   9   4   1    1.00    1.00
  -9   4  -1    0.80    0.80
  -9  -4  -1    0.90    0.80
  -9  -4  -1    1.60    0.90
   9  -4   1    1.10    0.80
   9  -4   1    1.50    0.90
  -9   4  -2    0.00    0.80
   9   4   2   -0.30    2.00
   9   4   2    1.10    1.10
   9  -4   2    1.90    0.90
  -9  -4  -2    1.50    0.90
   9  -4   2    0.60    0.90
  -9  -4  -2    3.20    1.10
  -9   4  -3   51.39    3.50
   9   4   3   46.90    4.70
   9   4   3   53.09    3.80
  -9  -4  -3   61.09    3.50
   9  -4   3   52.19    3.40
   9  -4   3   58.99    3.40
  -9  -4  -3   60.39    3.70
  -9   4  -4    6.80    1.40
   9   4   4    5.10    2.50
   9   4   4    6.80    1.60
   9  -4   4    5.20    1.20
   9  -4   4    7.20    1.20
  -9  -4  -4    5.00    1.20
  -9   4  -5   -1.80    1.30
   9   4   5    0.20    1.60
   9   4   5    0.90    2.50
   9  -4   5   -0.50    1.10
   9  -4   5    0.20    1.10
  -9  -4  -5   -0.20    1.10
   9   4   6   15.70    3.40
   9   4   6   11.00    2.10
  -9   4  -6   11.50    1.80
  -9  -4  -6    8.80    1.60
   9  -4   6   10.10    1.50
   9   4   7    6.20    3.10
  -9   4  -7    3.90    1.80
   9   4   7    7.30    2.20
  -9  -4  -7    5.40    1.50
   9  -4   7    4.00    1.30
   9   4   8    6.60    3.50
  -9   4  -8    9.20    2.10
   9   4   8    3.50    2.20
  -9  -4  -8    4.70    1.60
   9  -4   8    3.90    1.40
   9   4   9    4.80    2.40
   9   4   9   -2.20    3.60
  -9   4  -9    3.30    2.10
  -9  -4  -9    2.70    1.80
   9  -4   9    0.50    1.50
  -9   4 -10   17.10    2.80
   9   4  10   18.90    3.10
   9   4  10   10.70    4.60
   9  -4  10   14.70    2.10
  -9  -4 -10   11.10    2.30
  -9   5  13    2.90    3.30
   9   5 -13    1.20    2.90
   9  -5 -13   -1.60    2.30
   9   5 -12    5.70    2.90
  -9   5  12   10.40    3.20
   9  -5 -12   10.30    2.50
   9   5 -11    7.30    2.60
  -9   5  11    7.00    2.80
  -9  -5  11    5.80    1.40
   9  -5 -11    5.30    2.20
   9   5 -10   10.80    2.50
  -9   5  10    3.10    2.50
  -9  -5  10   11.10    1.50
   9  -5 -10   12.20    2.20
  -9   5   9   -1.40    2.10
   9   5  -9    0.90    2.00
  -9  -5   9    1.90    1.20
   9  -5  -9   -0.10    1.70
  -9   5   8   15.30    2.50
   9   5  -8   13.80    2.20
   9  -5  -8   16.40    2.10
  -9  -5   8   14.30    1.50
  -9   5   7   57.29    4.60
   9   5  -7   61.79    4.30
  -9  -5   7   60.49    3.70
   9  -5  -7   59.69    3.70
   9  -5  -7   62.19    4.20
   9   5  -6    8.70    1.70
  -9   5   6    6.40    1.80
   9  -5  -6    6.40    1.00
  -9  -5   6    6.30    1.10
  -9  -5   6    6.60    0.80
   9  -5  -6    5.20    1.50
   9   5  -5   63.79    4.20
  -9   5   5   67.19    4.30
   9  -5  -5   63.59    3.70
  -9  -5   5   68.29    3.70
   9  -5  -5   68.59    4.00
  -9  -5   5   64.09    3.50
  -9   5   4   83.59    4.90
   9   5  -4   78.09    4.70
   9  -5  -4   81.49    4.30
   9  -5  -4   88.29    4.70
  -9  -5   4   79.09    4.30
   9  -5  -4   79.99    5.00
  -9  -5   4   87.29    4.50
  -9   5   3   38.60    2.80
   9   5  -3   33.10    2.60
   9  -5  -3   35.50    2.70
  -9  -5   3   33.70    2.10
   9  -5  -3   33.60    2.50
  -9  -5   3   34.90    2.30
   9  -5  -3   33.00    2.10
   9   5  -2   17.50    1.60
  -9   5   2   17.50    1.60
   9  -5  -2   18.70    1.40
   9  -5  -2   18.50    1.40
  -9  -5   2   18.00    1.50
  -9  -5   2   16.00    1.70
  -9   5   1   75.19    4.30
   9   5  -1   73.49    4.40
   9  -5  -1   73.49    4.00
  -9  -5   1   76.19    4.10
   9  -5  -1   81.49    4.00
  -9  -5   1   79.59    4.20
  -9   5   0    8.80    1.10
   9   5   0    6.10    1.20
  -9  -5   0    8.80    1.10
   9  -5   0   10.00    0.80
  -9  -5   0    9.30    1.10
   9  -5   0    8.00    0.90
   9   5   1   20.80    3.30
  -9   5  -1   19.50    1.90
   9   5   1   16.60    1.70
  -9  -5  -1   17.20    1.80
   9  -5   1   18.40    1.50
   9  -5   1   22.10    1.40
  -9  -5  -1   22.00    2.00
   9   5   2   -3.50    2.50
  -9   5  -2   -0.50    0.90
   9   5   2    1.30    1.20
  -9  -5  -2    0.70    0.90
  -9  -5  -2    0.80    1.00
   9  -5   2    1.90    0.70
   9  -5   2    1.10    0.70
   9   5   3  114.29    6.20
  -9   5  -3  110.29    5.90
   9   5   3   97.69    7.20
  -9  -5  -3  111.09    5.90
   9  -5   3  110.49    5.60
   9  -5   3  106.19    5.60
  -9  -5  -3  103.69    5.80
   9   5   4    2.00    2.70
  -9   5  -4    1.70    1.20
   9   5   4    0.10    1.40
  -9  -5  -4    2.70    1.40
   9  -5   4    0.90    0.90
  -9  -5  -4    0.70    1.00
   9   5   5   27.30    2.60
  -9   5  -5   27.20    2.90
   9   5   5   38.10    4.60
  -9  -5  -5   30.80    2.70
   9  -5   5   27.20    2.20
   9   5   6    7.30    2.10
  -9   5  -6    7.70    1.70
   9   5   6    9.20    3.20
  -9  -5  -6    5.90    1.40
   9  -5   6    7.00    1.20
   9   5   7   -0.60    3.20
  -9   5  -7    1.10    1.70
   9   5   7    3.40    2.20
  -9  -5  -7    0.70    1.40
   9  -5   7    1.10    1.00
   9   5   8    2.80    3.30
   9   5   8    4.60    2.40
  -9   5  -8    2.50    1.90
   9  -5   8    1.40    1.20
  -9  -5  -8    2.00    1.60
   9   5   9    1.00    3.70
   9   5   9    1.90    2.50
  -9   5  -9   -0.60    2.10
  -9  -5  -9    0.20    1.70
  -9   6  12    8.70    3.10
   9   6 -12    8.70    2.90
   9  -6 -12    2.20    2.10
  -9   6  11   -1.00    2.70
   9   6 -11    0.10    2.50
   9  -6 -11    1.60    1.90
   9   6 -10    3.40    2.30
  -9   6  10    2.90    2.50
   9  -6 -10    1.40    1.70
  -9   6   9   11.30    2.60
   9   6  -9    8.20    2.20
   9  -6  -9    8.10    1.70
  -9   6   8   40.80    4.40
   9   6  -8   47.60    4.00
   9  -6  -8   49.40    3.40
   9   6  -7    0.00    1.50
  -9   6   7    1.80    1.90
   9  -6  -7   -0.80    1.10
  -9   6   6    0.50    1.60
   9   6  -6    1.60    1.40
   9  -6  -6    0.30    0.90
  -9   6   5   21.40    2.20
   9   6  -5   23.40    2.10
   9  -6  -5   22.30    1.70
   9   6  -4   31.80    2.80
  -9   6   4   42.70    4.40
  -9   6   4   35.50    3.00
   9   6  -3    0.10    1.00
  -9   6   3   -1.00    1.10
  -9   6   3   -0.30    2.20
  -9   6   2   29.40    2.40
  -9   6   2   27.20    3.30
   9   6  -2   25.90    2.30
   9   6  -1    3.40    1.00
  -9   6   1    5.00    1.80
  -9   6   1    5.90    1.00
  -9   6   0   -0.20    0.80
   9   6   0    0.20    0.90
  -9   6   0   -0.50    1.50
   9   6   0    1.40    2.50
   9   6   1   41.00    4.70
  -9   6  -1   42.70    3.00
  -9   6  -1   45.80    2.90
   9   6   1   41.40    3.10
  -9  -6  -1   44.70    2.60
  -9  -6  -1   42.20    2.50
  -9   6  -2   57.59    3.60
  -9   6  -2   62.59    3.50
   9   6   2   59.29    5.40
   9   6   2   59.99    4.00
  -9  -6  -2   60.59    3.40
   9   6   3   65.49    4.40
  -9   6  -3   63.39    4.00
   9   6   3   68.79    5.70
  -9  -6  -3   63.99    3.70
   9   6   4    0.80    1.50
   9   6   4    2.20    2.80
  -9   6  -4    1.70    1.20
  -9  -6  -4    2.90    1.00
  -9   6  -5    2.70    1.40
   9   6   5    2.80    1.80
   9   6   5    5.40    3.20
  -9  -6  -5    2.00    1.10
   9   6   6    0.80    3.20
  -9   6  -6   -1.20    1.40
   9   6   6    1.00    1.80
  -9  -6  -6    0.00    1.20
  -9   6  -7   -3.50    1.50
   9   6   7   -1.90    2.10
   9   6   7    2.00    3.50
  -9  -6  -7    0.80    1.30
  -9   6  -8    1.60    2.00
   9   6   8    4.70    2.60
   9   6   8    7.80    4.10
  -9  -6  -8    5.00    1.60
  -9   7  10    2.50    2.60
   9   7  -9   13.20    2.60
  -9   7   9   20.00    2.90
  -9   7   8   11.20    2.50
   9   7  -8    9.40    2.10
   9   7  -7    3.70    1.70
  -9   7   7    4.40    2.00
  -9   7   6    1.20    1.80
   9   7  -6    1.60    1.50
   9   7  -5    4.80    1.40
  -9   7   5    2.20    2.90
  -9   7   5    3.80    1.60
  -9   7   4    0.00    2.60
   9   7  -4    0.10    1.10
  -9   7   4    1.30    1.30
  -9   7   3   29.30    3.50
   9   7  -3   21.90    2.30
  -9   7   3   23.10    2.10
   9   7  -2   -0.60    0.90
  -9   7   2    0.00    1.10
  -9   7   2   -1.60    2.10
  -9   7   1    4.30    1.10
  -9   7   1    3.90    2.00
   9   7  -1    4.60    1.10
  -9   7   0   10.20    1.30
   9   7   0    8.80    1.30
   9   7   0   16.50    3.40
  -9   7   0   16.20    2.20
   9   7   1    3.80    1.20
   9   7   1    7.00    2.90
  -9   7  -1    5.20    1.10
  -9   7  -1   12.20    2.90
  -9   7  -2   26.80    2.30
   9   7   2   27.10    2.80
   9   7   2   33.40    4.40
   9   7   3   -1.40    1.30
  -9   7  -3   -0.90    1.00
   9   7   3    3.20    2.90
  -9   7  -4    2.90    1.20
   9   7   4    4.10    1.60
   9   7   4    6.20    3.30
   9   7   5    1.90    3.40
  -9   7  -5    0.90    1.50
   9   7   5    2.40    1.80
   9   7   6    0.80    3.50
   9   7   6   -0.40    2.00
   9   7   7    2.90    2.20
   9   7   7    1.90    3.80
  -9   8   9    1.60    2.50
  -9   8   8    7.30    2.50
  -9   8   7    4.30    2.20
  -9   8   6    0.70    3.60
  -9   8   6    5.00    2.10
  -9   8   5   22.60    3.20
  -9   8   5   17.80    4.00
  -9   8   4    2.30    3.10
  -9   8   3   -1.80    2.50
  -9   8   2   -1.70    2.30
  -9   8   1    3.70    2.90
   9   8  -1    2.80    3.10
   9   8  -1    3.50    1.70
   9   8   0    5.50    1.30
   9   8   0    4.90    2.90
   9   8   1    3.70    3.00
   9   8   1    0.30    1.10
   9   8   2    2.40    1.30
   9   8   2    2.40    3.00
   9   8   3    2.70    3.30
   9   8   3    0.70    1.50
   9   8   4    3.60    1.70
   9   8   4    4.00    3.60
   9   8   5    2.20    3.30
   9   8   5    2.00    1.80
   9   8   6   12.90    2.40
   9   8   6   16.50    4.40
  -9   9   6   -1.00    3.80
  -9   9   5    9.10    4.10
  -9   9   4   -0.50    3.80
   9   9  -2   40.80    5.60
   9   9  -1    9.20    3.80
   9   9   0   13.90    4.00
   9   9   1   11.40    3.60
   9   9   2    8.30    3.70
   9   9   3    1.30    3.60
 -10   0  14   13.20    3.30
  10   0 -14   11.90    3.30
  10   0 -13    1.40    2.80
 -10   0  13    2.40    2.70
 -10   0  12   21.50    3.20
  10   0 -12   15.40    3.10
  10   0 -11   -2.30    2.50
 -10   0  11   -4.30    2.20
  10   0 -10    1.60    2.30
 -10   0  10    0.10    2.20
 -10   0   9   -1.10    1.90
  10   0  -9   -0.60    2.00
  10   0  -8   -0.20    1.80
 -10   0   8    1.90    1.80
 -10   0   7   -0.10    1.50
  10   0  -7    0.80    1.80
 -10   0   6    5.00    1.50
  10   0  -6    4.70    1.70
  10   0  -5   -0.90    1.30
 -10   0   5   -0.30    1.20
 -10   0   4  360.26   18.00
  10   0  -4  363.66   18.00
  10   0  -3   -0.60    1.10
 -10   0   3   -1.10    1.00
 -10   0   2   41.90    3.00
 -10   0   2   57.39    3.30
  10   0  -2   50.59    3.00
  10   0  -2   52.19    3.20
 -10   0   1    1.00    0.90
  10   0  -1   -0.30    0.80
  10   0  -1    0.30    0.90
  10   0   0    4.80    1.10
 -10   0   0    4.50    1.00
  10   0   1   -0.30    0.90
 -10   0  -1   -0.30    0.80
  10   0   1    0.20    0.90
 -10   0  -2    5.20    1.00
  10   0   2    5.30    1.10
  10   0   2    9.50    1.30
 -10   0  -3   -0.40    1.00
  10   0   3   -0.20    1.30
  10   0   3    0.50    1.10
  10   0   4    1.40    1.20
 -10   0  -4    2.50    1.20
  10   0   4    5.30    1.70
 -10   0  -5   -2.10    1.20
  10   0   5   -1.00    1.40
  10   0   6    3.30    1.60
 -10   0  -6    2.50    1.50
 -10   0  -7    0.00    1.50
  10   0   7    0.10    1.60
  10   0   8    0.90    1.70
 -10   0  -8    1.80    1.80
  10   0   9   -1.50    1.80
 -10   0  -9    0.10    1.90
 -10   0 -10    0.80    2.00
  10   0  10    1.80    2.00
 -10   0 -11    1.00    2.10
  10   0  11    1.20    2.30
 -10   1  14    4.20    3.10
  10   1 -14   -0.60    3.10
 -10  -1  14    5.60    2.80
  10  -1 -14   -1.70    3.00
  10   1 -13   33.60    4.10
 -10   1  13   38.60    4.10
 -10  -1  13   37.00    3.90
  10  -1 -13   28.80    3.90
  10   1 -12   -6.70    2.50
 -10   1  12   -3.50    2.50
  10  -1 -12   -3.10    2.50
 -10  -1  12   -0.60    2.40
 -10   1  11   -0.30    2.40
  10   1 -11   -7.50    2.20
 -10  -1  11   -2.40    2.30
  10  -1 -11   -5.90    2.30
  10   1 -10    0.90    2.30
 -10   1  10    0.10    2.10
  10  -1 -10   -2.20    2.20
 -10  -1  10   -2.00    2.10
 -10   1   9   23.10    2.80
  10   1  -9   30.00    3.00
  10  -1  -9   30.60    3.10
 -10  -1   9   37.90    3.60
 -10   1   8   36.80    3.70
  10   1  -8   41.00    3.80
 -10  -1   8   35.70    3.60
  10  -1  -8   39.30    3.80
  10   1  -7    4.20    1.80
 -10   1   7    0.50    1.60
 -10  -1   7    1.20    1.60
  10  -1  -7    0.30    1.70
  10   1  -6    2.00    1.50
 -10   1   6    0.60    1.60
  10  -1  -6    0.40    1.50
 -10  -1   6    1.70    1.40
  10   1  -5   18.10    2.00
 -10   1   5   24.10    2.40
  10  -1  -5   19.40    2.10
 -10  -1   5   19.30    2.00
  10   1  -4   -0.30    1.20
 -10   1   4    1.90    1.20
 -10  -1   4    2.50    1.00
  10  -1  -4    1.80    1.30
 -10  -1   4    2.60    1.10
  10   1  -3    0.50    1.00
 -10   1   3    1.20    1.00
 -10  -1   3    1.10    0.80
  10  -1  -3    0.50    1.20
 -10  -1   3    0.50    0.90
  10  -1  -3    0.90    0.80
 -10   1   2  114.99    6.70
  10   1  -2  117.69    6.70
 -10  -1   2  142.39    6.70
  10  -1  -2  127.89    6.60
  10  -1  -2  127.79    6.80
 -10  -1   2  135.69    6.70
  10   1  -1    2.80    1.00
 -10   1   1    2.80    0.90
  10  -1  -1    4.40    0.90
 -10  -1   1    3.30    0.90
  10  -1  -1    3.40    1.10
 -10  -1   1    4.60    1.00
 -10   1   0   35.90    2.40
 -10  -1   0   36.80    2.40
  10  -1   0   32.20    2.50
  10  -1   0   32.40    2.30
 -10  -1   0   31.80    2.40
 -10   1  -1   49.60    3.10
  10   1   1   48.40    3.30
  10   1   1   49.90    3.10
 -10  -1  -1   49.99    3.10
  10  -1   1   53.59    3.20
  10  -1   1   46.30    2.70
 -10   1  -2  127.29    6.40
  10   1   2  123.49    6.60
  10   1   2  111.69    6.40
  10  -1   2  119.79    6.40
 -10  -1  -2  114.49    6.30
  10   1   3   65.19    4.10
  10   1   3   67.59    4.30
 -10   1  -3   61.79    3.90
  10  -1   3   64.69    3.90
 -10  -1  -3   63.69    3.90
 -10   1  -4    5.80    1.30
  10   1   4    2.50    1.30
  10   1   4    9.10    2.10
  10  -1   4    7.30    1.50
 -10  -1  -4    3.80    1.20
  10   1   5    0.30    1.50
 -10   1  -5   -0.80    1.20
  10   1   5    3.00    2.10
  10  -1   5    1.50    1.40
 -10  -1  -5    0.30    1.20
 -10   1  -6   96.89    5.70
  10   1   6   94.79    6.30
 -10   1  -6   92.79    5.30
 -10  -1  -6   91.29    5.60
  10  -1   6   90.79    5.60
  10   1   7    2.50    1.80
 -10   1  -7    3.10    1.70
 -10  -1  -7    1.80    1.50
  10  -1   7    0.90    1.50
  10   1   8   -0.60    1.80
 -10   1  -8   -0.30    1.80
 -10  -1  -8   -1.60    1.60
  10  -1   8   -3.00    1.50
 -10   1  -9    0.90    2.00
  10   1   9    1.00    1.90
 -10  -1  -9   -1.20    1.70
  10  -1   9    1.60    1.80
 -10   1 -10   -0.20    2.10
  10   1  10    1.60    2.20
  10  -1  10    0.90    1.90
 -10  -1 -10    0.30    2.10
 -10   1 -11   12.60    2.70
  10   1  11   13.40    2.60
  10  -1  11   10.50    2.40
 -10  -1 -11   14.20    2.70
 -10   2  14   -0.20    3.20
  10   2 -14    2.80    3.20
  10  -2 -14    4.00    3.10
 -10  -2  14    3.30    2.70
 -10   2  13    9.90    3.10
  10   2 -13    3.70    3.00
  10  -2 -13    7.40    3.00
 -10  -2  13    8.90    2.70
  10   2 -12    1.10    2.70
 -10   2  12    0.70    2.70
 -10  -2  12    3.10    2.40
  10  -2 -12   -1.70    2.50
  10   2 -11   22.80    3.20
 -10   2  11   21.70    3.30
  10  -2 -11   16.70    2.90
 -10  -2  11   24.70    3.00
  10   2 -10   -0.70    2.10
 -10   2  10   -0.60    2.30
 -10  -2  10    3.00    2.10
  10  -2 -10   -1.80    2.20
  10   2  -9    6.10    2.20
 -10   2   9    6.70    2.30
 -10  -2   9    7.00    2.10
  10  -2  -9    4.80    2.20
 -10   2   8   19.70    2.60
  10   2  -8   29.50    2.70
  10  -2  -8   24.70    2.80
 -10  -2   8   23.60    2.60
 -10   2   7    0.10    1.70
  10   2  -7   -0.70    1.70
  10  -2  -7    1.90    1.80
 -10  -2   7    1.30    1.60
 -10   2   6   16.20    2.00
  10   2  -6   13.50    2.00
 -10  -2   6   13.80    1.80
  10  -2  -6   15.90    2.00
  10   2  -5  107.29    6.10
 -10   2   5  108.89    6.00
 -10  -2   5  115.29    6.00
 -10  -2   5  104.39    5.80
  10  -2  -5  112.69    6.20
  10  -2  -5  103.39    6.40
 -10   2   4    0.30    1.20
  10   2  -4    3.00    1.20
  10  -2  -4    3.10    1.70
 -10  -2   4    2.20    0.90
 -10  -2   4    2.80    1.20
  10  -2  -4    3.00    1.40
  10  -2  -4    2.40    1.00
  10   2  -3    8.30    1.30
 -10   2   3    3.10    1.10
 -10  -2   3    7.10    1.00
  10  -2  -3    5.10    1.40
  10  -2  -3    5.20    1.00
 -10  -2   3    4.80    1.20
  10  -2  -3    7.90    1.60
 -10   2   2  203.68   10.00
  10   2  -2  186.78   10.00
  10  -2  -2  196.68    9.90
  10  -2  -2  187.18   10.00
 -10  -2   2  210.38   10.00
  10  -2  -2  195.58   10.10
 -10  -2   2  202.48   10.00
 -10   2   1   90.19    4.70
  10   2  -1   83.79    4.70
  10  -2  -1   80.59    4.60
  10  -2  -1   87.79    4.70
  10  -2  -1   84.49    4.30
 -10  -2   1   82.49    4.60
 -10  -2   1   81.79    4.60
  10   2   0   12.70    1.50
 -10   2   0   18.90    1.80
 -10  -2   0   18.90    1.70
  10  -2   0   16.40    1.60
 -10  -2   0   17.40    1.80
  10  -2   0   17.10    1.60
  10   2   1   -1.00    0.90
  10   2   1    0.10    1.40
 -10   2  -1    1.60    0.90
  10  -2   1   -0.20    0.80
 -10  -2  -1    0.40    0.80
  10  -2   1    1.00    1.00
 -10   2  -2   77.69    4.70
  10   2   2   85.19    5.10
  10   2   2   89.99    4.90
  10  -2   2   80.79    4.60
 -10  -2  -2   81.89    4.70
  10  -2   2   83.99    4.70
  10   2   3  161.38    8.90
  10   2   3  163.78    8.70
 -10   2  -3  164.78    8.50
 -10  -2  -3  162.08    8.50
  10  -2   3  165.08    8.50
  10   2   4   42.40    3.90
 -10   2  -4   42.60    3.20
  10  -2   4   42.10    3.10
 -10  -2  -4   39.80    3.10
  10   2   5    8.40    1.80
 -10   2  -5   13.00    1.80
  10   2   5   20.30    2.90
  10  -2   5   10.60    1.60
 -10  -2  -5    8.60    1.60
  10   2   6    2.60    2.40
 -10   2  -6    1.90    1.60
  10   2   6    0.80    1.60
 -10  -2  -6   -0.20    1.30
  10  -2   6    0.10    1.30
 -10   2  -7   -2.90    1.60
  10   2   7   -2.60    1.70
  10   2   7    0.20    2.60
  10  -2   7   -1.10    1.40
 -10  -2  -7    0.90    1.50
 -10   2  -8   -0.70    1.70
  10   2   8    0.60    1.90
  10   2   8   -0.80    2.90
 -10  -2  -8   -1.50    1.50
  10  -2   8    0.70    1.60
 -10   2  -9   10.80    2.40
  10   2   9   10.30    2.30
  10  -2   9   10.50    2.10
 -10  -2  -9   10.70    2.20
 -10   2 -10    5.80    2.30
  10   2  10    3.20    2.20
 -10  -2 -10    4.70    2.00
  10  -2  10    4.00    2.00
 -10   3  14    0.80    3.30
  10   3 -14    0.30    3.10
 -10  -3  14   -2.00    2.20
  10  -3 -14    0.80    2.90
 -10   3  13    0.90    3.00
  10   3 -13    1.60    2.90
  10  -3 -13    3.90    2.70
 -10  -3  13    2.50    2.30
  10   3 -12    4.10    2.70
 -10   3  12    2.70    2.80
 -10  -3  12    1.50    2.10
  10  -3 -12    3.60    2.60
  10   3 -11   44.70    4.10
 -10   3  11   38.80    4.00
  10  -3 -11   50.29    4.80
 -10  -3  11   50.59    4.40
 -10   3  10   -2.60    2.30
  10   3 -10    1.10    2.20
  10  -3 -10   -1.40    2.10
 -10  -3  10    0.30    1.90
 -10   3   9   22.00    2.90
  10   3  -9   23.90    2.90
 -10  -3   9   19.80    2.50
  10  -3  -9   22.20    2.70
  10   3  -8   28.90    2.80
 -10   3   8   27.40    2.80
  10  -3  -8   20.50    2.60
 -10  -3   8   20.90    2.40
 -10   3   7  103.19    6.50
  10   3  -7  110.49    6.40
 -10  -3   7  112.59    6.30
  10  -3  -7  112.09    6.50
  10   3  -6    2.80    1.60
 -10   3   6    5.80    1.70
 -10  -3   6    4.20    1.10
  10  -3  -6    4.10    1.70
 -10  -3   6    2.30    1.50
 -10   3   5   12.00    1.60
  10   3  -5    7.70    1.50
 -10  -3   5    6.70    1.40
  10  -3  -5    9.90    1.30
 -10  -3   5    9.00    1.10
  10  -3  -5    9.90    2.10
  10  -3  -5    5.50    1.60
  10   3  -4    8.70    1.40
 -10   3   4    6.20    1.30
  10  -3  -4    6.10    1.10
  10  -3  -4   10.50    1.80
 -10  -3   4    8.50    1.40
  10  -3  -4    9.50    1.60
 -10  -3   4    7.50    1.00
  10   3  -3   15.50    1.50
 -10   3   3   12.20    1.40
 -10  -3   3   15.40    1.60
 -10  -3   3   14.30    1.50
  10  -3  -3   12.10    1.20
  10  -3  -3   13.90    1.60
  10  -3  -3   13.10    1.70
  10   3  -2    9.50    1.30
 -10   3   2   12.80    1.40
 -10  -3   2    8.70    1.10
  10  -3  -2    9.70    1.00
  10  -3  -2   11.30    1.40
 -10  -3   2   10.10    1.30
  10  -3  -2    9.70    1.30
 -10   3   1  134.29    6.90
  10   3  -1  121.89    6.90
 -10  -3   1  139.19    6.80
  10  -3  -1  128.29    6.80
 -10  -3   1  128.89    6.90
  10  -3  -1  137.59    6.90
 -10   3   0   63.49    3.80
  10   3   0   62.09    3.80
  10  -3   0   63.19    3.80
  10  -3   0   69.59    3.70
 -10  -3   0   60.99    3.80
 -10  -3   0   68.39    3.70
  10   3   1   23.20    3.00
  10   3   1   24.90    2.30
 -10   3  -1   22.60    2.10
 -10  -3  -1   26.70    2.10
 -10  -3  -1   23.20    2.20
  10  -3   1   25.30    2.00
  10  -3   1   27.60    2.30
  10   3   2   -0.60    1.80
  10   3   2    0.50    1.10
 -10   3  -2   -0.10    0.90
  10  -3   2    0.40    1.10
  10  -3   2   -1.30    1.00
 -10  -3  -2    0.60    0.90
 -10   3  -3  115.49    6.70
  10   3   3  128.99    6.80
  10   3   3  124.19    7.50
 -10  -3  -3  122.69    6.60
  10  -3   3  123.59    6.70
  10  -3   3  125.99    6.60
  10   3   4   34.00    3.90
  10   3   4   40.00    3.40
 -10   3  -4   40.40    3.20
  10  -3   4   37.30    2.90
 -10  -3  -4   39.10    2.90
  10   3   5    4.20    2.50
 -10   3  -5    1.10    1.30
  10   3   5   -1.00    1.60
  10  -3   5    0.70    1.30
 -10  -3  -5    1.10    1.20
  10   3   6    1.60    1.80
  10   3   6    1.30    2.70
 -10   3  -6    0.30    1.50
 -10  -3  -6    2.70    1.40
  10  -3   6    0.30    1.30
 -10   3  -7   -1.80    1.60
  10   3   7    1.70    1.90
  10   3   7    0.50    2.70
  10  -3   7   -1.00    1.30
 -10  -3  -7    0.30    1.40
  10   3   8   15.60    3.80
 -10   3  -8   15.40    2.40
  10   3   8   20.50    2.70
  10  -3   8   14.00    2.00
 -10  -3  -8   16.60    2.20
  10   3   9    9.80    2.50
 -10   3  -9    7.10    2.20
  10   3   9    8.70    3.90
  10  -3   9    6.10    1.80
 -10  -3  -9    6.50    2.00
 -10   3 -10    2.10    2.40
  10   3  10    8.10    2.60
 -10  -3 -10    3.80    2.00
  10  -3  10    3.90    1.90
  10   4 -13   -2.50    2.80
 -10   4  13    4.10    3.10
 -10  -4  13    4.90    2.00
  10  -4 -13    4.40    2.60
 -10   4  12    1.60    2.90
  10   4 -12   -0.30    2.60
 -10  -4  12    0.10    1.90
  10  -4 -12   -2.70    2.30
 -10   4  11   13.70    2.90
  10   4 -11   17.30    3.00
 -10  -4  11   14.10    2.20
  10  -4 -11   16.10    2.70
 -10   4  10   23.00    3.10
  10   4 -10   29.80    3.10
 -10  -4  10   23.70    2.50
  10  -4 -10   19.40    2.80
 -10   4   9   30.80    3.30
  10   4  -9   38.60    3.40
 -10  -4   9   41.20    3.60
  10  -4  -9   41.70    4.10
  10   4  -8   26.10    2.70
 -10   4   8   25.70    2.90
 -10  -4   8   27.40    2.40
  10  -4  -8   23.70    2.60
 -10  -4   8   30.00    3.10
  10   4  -7   22.10    2.40
 -10   4   7   22.00    2.50
 -10  -4   7   21.30    2.00
  10  -4  -7   23.20    2.40
 -10  -4   7   24.30    2.20
  10   4  -6  155.08    8.40
 -10   4   6  150.38    8.50
  10  -4  -6  156.08    8.40
 -10  -4   6  142.69    7.90
  10  -4  -6  160.28    8.10
 -10  -4   6  169.98    8.30
 -10   4   5  142.59    7.50
  10   4  -5  133.49    7.40
  10  -4  -5  125.99    7.40
 -10  -4   5  136.39    7.00
  10  -4  -5  142.29    7.20
 -10  -4   5  140.29    7.30
  10  -4  -5  134.59    7.70
  10   4  -4  119.49    6.80
 -10   4   4  117.29    6.80
  10  -4  -4  124.69    6.50
  10  -4  -4  127.99    6.90
 -10  -4   4  129.89    6.70
  10  -4  -4  129.69    6.90
 -10  -4   4  128.99    6.50
 -10   4   3    7.50    1.30
  10   4  -3   12.20    1.40
  10  -4  -3    8.00    1.50
 -10  -4   3   10.80    1.40
  10  -4  -3   10.10    1.10
  10  -4  -3   14.70    1.70
 -10  -4   3   11.00    1.10
 -10   4   2    0.50    0.90
  10   4  -2    0.10    1.00
 -10  -4   2    1.00    0.70
  10  -4  -2    1.70    0.70
  10  -4  -2    1.00    1.20
 -10  -4   2    1.60    1.00
  10   4  -1   31.20    2.40
 -10   4   1   32.30    2.30
  10  -4  -1   30.60    2.40
 -10  -4   1   28.40    2.10
  10  -4  -1   28.50    2.00
 -10  -4   1   30.70    2.30
 -10   4   0    0.70    0.80
  10   4   0   -1.10    0.90
 -10  -4   0   -0.40    0.90
  10  -4   0   -0.30    1.00
 -10  -4   0   -0.90    0.80
 -10   4  -1    3.10    1.00
  10   4   1    3.30    1.10
  10   4   1    3.50    2.20
  10  -4   1    2.30    1.10
 -10  -4  -1    3.10    1.00
 -10  -4  -1    4.40    1.00
  10  -4   1    3.00    0.90
 -10   4  -2    0.50    1.00
  10   4   2   -2.70    2.00
  10   4   2   -0.30    1.20
  10  -4   2   -1.50    0.90
  10  -4   2   -0.60    1.00
 -10  -4  -2   -0.40    1.00
 -10  -4  -2   -0.60    1.00
  10   4   3   20.00    3.10
  10   4   3   12.10    1.80
  10  -4   3   18.10    1.60
  10  -4   3   16.10    1.60
 -10  -4  -3   17.90    1.70
 -10   4  -4   61.79    4.10
  10   4   4   63.19    5.30
  10   4   4   67.59    4.50
  10  -4   4   59.09    3.90
 -10  -4  -4   65.49    4.00
  10  -4   4   66.69    3.90
  10   4   5   19.90    3.50
  10   4   5   16.30    2.10
 -10   4  -5   12.10    1.80
 -10  -4  -5   14.50    1.70
  10  -4   5   13.80    1.60
 -10   4  -6   14.00    2.00
  10   4   6   13.30    2.20
  10   4   6   13.30    3.30
 -10  -4  -6   12.10    1.70
  10  -4   6   10.00    1.60
  10   4   7    0.60    2.90
  10   4   7    2.10    1.90
 -10   4  -7   -0.70    1.70
  10  -4   7   -0.70    1.30
 -10  -4  -7    1.00    1.50
  10   4   8   -0.20    3.20
 -10   4  -8    1.10    1.90
  10   4   8    0.60    2.20
  10  -4   8   -1.30    1.40
 -10  -4  -8   -0.80    1.60
  10   4   9    8.70    2.60
  10   4   9    8.90    4.20
 -10   4  -9    6.20    2.40
 -10  -4  -9   11.00    2.10
  10  -4   9   10.50    1.80
  10   4  10   -6.20    4.00
  10   4  10    4.40    2.60
 -10   4 -10    4.80    2.40
 -10  -4 -10    3.20    2.00
  10  -4  10    2.50    1.70
  10   5 -12    1.70    2.70
 -10   5  12    0.50    3.00
  10  -5 -12   -1.00    2.20
  10   5 -11    1.10    2.50
 -10   5  11    0.90    2.70
 -10  -5  11   -0.40    1.30
  10  -5 -11   -1.50    2.00
 -10   5  10    5.30    2.60
  10   5 -10    4.50    2.40
 -10  -5  10    5.20    1.50
  10  -5 -10    4.90    2.10
  10   5  -9    4.80    2.20
 -10   5   9    4.90    2.40
 -10  -5   9    8.00    1.40
  10  -5  -9    5.30    1.90
 -10   5   8   72.69    5.50
  10   5  -8   73.19    5.10
 -10  -5   8   77.29    4.50
  10  -5  -8   79.59    5.10
  10   5  -7   47.40    3.90
 -10   5   7   52.59    4.10
  10  -5  -7   52.39    3.90
 -10  -5   7   49.40    3.40
 -10   5   6   19.90    2.30
  10   5  -6   22.00    2.30
  10  -5  -6   23.00    2.20
  10  -5  -6   22.00    2.00
 -10  -5   6   24.20    2.30
 -10  -5   6   23.40    1.80
  10   5  -5  230.38   12.00
 -10   5   5  237.38   12.10
  10  -5  -5  238.78   11.90
  10  -5  -5  232.98   11.70
 -10  -5   5  242.38   11.80
 -10  -5   5  222.98   11.60
  10   5  -4   88.99    5.30
 -10   5   4   98.59    5.40
  10  -5  -4   88.49    5.40
 -10  -5   4   96.79    5.10
  10  -5  -4   95.19    5.20
  10  -5  -4   90.49    4.90
 -10  -5   4   91.99    4.80
 -10   5   3   -1.00    1.10
  10   5  -3   -1.20    1.00
  10  -5  -3   -1.50    0.60
  10  -5  -3   -0.70    1.10
 -10  -5   3    0.20    0.70
 -10  -5   3   -1.40    0.90
 -10   5   2   -1.10    1.00
  10   5  -2   -0.20    1.00
  10  -5  -2   -2.80    0.90
 -10  -5   2   -1.40    0.90
 -10  -5   2    0.00    0.70
  10  -5  -2   -0.60    0.60
  10   5  -1   10.00    1.40
 -10   5   1    9.90    1.30
  10  -5  -1    9.40    1.20
 -10  -5   1   11.80    1.30
 -10  -5   1   12.30    1.20
 -10   5   0    7.30    1.10
  10   5   0    5.40    2.40
  10   5   0    6.30    1.20
  10  -5   0    7.20    0.90
  10  -5   0    7.20    1.00
 -10  -5   0    6.00    1.10
 -10  -5   0    8.00    1.10
 -10   5  -1    0.80    0.90
  10   5   1    1.50    1.10
  10   5   1   -0.90    2.30
 -10  -5  -1    1.20    1.00
  10  -5   1    0.80    0.80
  10  -5   1    1.00    0.90
 -10  -5  -1    0.10    1.00
 -10   5  -2   72.59    4.40
  10   5   2   70.79    5.80
  10   5   2   71.49    4.70
 -10  -5  -2   76.69    4.40
  10  -5   2   80.29    4.10
 -10  -5  -2   80.69    4.50
  10  -5   2   76.59    4.10
  10   5   3    2.90    1.50
  10   5   3    0.60    2.50
 -10   5  -3    2.90    1.20
 -10  -5  -3    3.50    1.30
 -10  -5  -3    3.50    1.20
  10  -5   3    1.80    0.90
 -10   5  -4   37.40    3.20
  10   5   4   43.10    4.80
  10   5   4   44.80    3.60
 -10  -5  -4   38.80    3.00
  10  -5   4   39.50    2.70
  10   5   5   -1.10    1.60
 -10   5  -5   -0.10    1.30
  10   5   5    1.30    2.80
  10  -5   5   -1.50    1.00
 -10  -5  -5   -1.10    1.10
  10   5   6   -0.40    1.80
  10   5   6   -2.20    2.90
 -10   5  -6   -0.20    1.50
 -10  -5  -6   -1.10    1.30
  10  -5   6   -0.70    1.00
 -10   5  -7   -1.50    1.70
  10   5   7   -0.30    3.00
  10   5   7   -1.90    2.00
  10  -5   7   -0.70    1.10
 -10  -5  -7   -0.60    1.40
 -10   5  -8    1.60    2.00
  10   5   8    2.60    3.70
  10   5   8    2.10    2.20
 -10  -5  -8   -0.20    1.60
 -10   5  -9   12.70    2.50
  10   5   9   10.40    2.70
  10   5   9   11.00    4.40
 -10  -5  -9   10.00    2.00
 -10   6  11   13.80    3.20
  10   6 -11    9.80    2.80
  10  -6 -11    9.30    2.20
  10   6 -10    3.30    2.40
 -10   6  10    5.20    2.70
  10  -6 -10    6.90    1.90
  10   6  -9   54.69    4.80
 -10   6   9   56.69    5.10
  10  -6  -9   55.09    4.00
 -10   6   8   16.30    2.50
  10   6  -8    9.20    2.20
  10  -6  -8    9.30    1.60
 -10   6   7   29.10    2.90
  10   6  -7   30.90    2.80
  10  -6  -7   30.80    2.70
 -10   6   6   10.70    2.00
  10   6  -6    9.80    1.80
  10  -6  -6    9.90    1.30
  10   6  -5    0.50    1.30
 -10   6   5    0.50    1.40
  10  -6  -5    0.70    0.90
  10   6  -4    0.00    1.10
 -10   6   4    1.80    1.30
  10  -6  -4    0.30    0.70
  10   6  -3   15.90    1.70
 -10   6   3   18.50    1.80
 -10   6   2   26.10    2.40
  10   6  -2   24.80    2.40
  10   6  -1   37.60    2.70
 -10   6   1   36.90    2.60
 -10  -6   1   31.70    2.00
 -10  -6   1   38.00    2.10
  10   6   0    9.70    2.80
  10   6   0    7.00    1.30
 -10   6   0    4.80    1.10
 -10  -6   0    6.30    0.90
 -10   6  -1   35.70    2.70
  10   6   1   36.40    4.50
  10   6   1   36.90    3.00
 -10  -6  -1   38.40    2.40
  10   6   2   57.99    3.90
 -10   6  -2   54.99    3.60
  10   6   2   57.59    5.30
 -10  -6  -2   55.49    3.30
  10   6   3    9.90    3.20
 -10   6  -3    5.40    1.30
  10   6   3    7.30    1.60
 -10  -6  -3    3.80    1.10
  10   6   4    4.40    3.10
 -10   6  -4    0.40    1.20
  10   6   4    0.50    1.60
 -10  -6  -4   -0.40    1.00
  10   6   5    2.80    1.80
 -10   6  -5    1.00    1.40
  10   6   5    4.30    3.00
 -10  -6  -5    1.50    1.20
  10   6   6    1.00    1.90
 -10   6  -6    0.20    1.50
  10   6   6    4.00    3.40
 -10  -6  -6   -1.30    1.20
  10   6   7    1.20    2.20
 -10   6  -7   -1.10    1.70
  10   6   7    4.60    3.40
 -10  -6  -7    0.80    1.40
  10   6   8    3.10    2.50
 -10   6  -8    0.80    2.00
  10   6   8    7.30    3.90
 -10  -6  -8    2.80    1.60
 -10   7  10    4.00    2.70
 -10   7   9    2.50    2.40
  10   7  -9    1.30    2.30
  10   7  -8   15.90    2.50
 -10   7   8   19.20    2.80
 -10   7   7   -1.30    1.90
  10   7  -7    1.00    1.70
 -10   7   6   -0.20    1.70
  10   7  -6    0.10    1.50
  10   7  -5    9.60    1.60
 -10   7   5    9.60    1.80
 -10   7   4    1.80    1.40
  10   7  -4    1.50    1.20
 -10   7   3    6.00    2.70
  10   7  -3    7.00    1.30
 -10   7   3   10.90    1.60
 -10   7   2    3.10    2.40
  10   7  -2    5.60    1.20
 -10   7   2    5.00    1.30
 -10   7   1   -2.50    1.90
  10   7  -1    5.90    2.70
  10   7  -1    2.10    1.00
 -10   7   1    1.40    1.10
  10   7   0    3.30    2.80
 -10   7   0    2.80    1.00
  10   7   0    0.90    1.10
 -10   7  -1    8.00    1.30
  10   7   1   10.60    3.30
  10   7   1    4.70    1.30
  10   7   2   27.90    4.10
  10   7   2   30.70    2.90
 -10   7  -2   27.30    2.50
 -10   7  -3    2.70    1.20
  10   7   3    3.90    1.60
  10   7   3    7.10    3.30
  10   7   4    6.60    1.80
  10   7   4    7.50    3.40
 -10   7  -4    3.40    1.30
  10   7   5    2.10    3.30
  10   7   5   -1.60    1.80
  10   7   6   14.50    2.40
  10   7   6   15.20    4.20
  10   7   7   18.90    2.90
  10   7   7   22.00    4.70
 -10   8   8    9.10    2.70
 -10   8   7   12.50    2.80
 -10   8   6    0.40    2.60
 -10   8   4    9.00    3.30
 -10   8   3   -2.60    2.80
  10   8  -1    2.80    2.80
  10   8   0    3.10    3.20
  10   8   0    0.80    1.20
  10   8   1   12.30    1.70
  10   8   1   17.60    3.80
  10   8   2   13.10    1.80
  10   8   2   15.70    3.60
  10   8   3   -1.40    1.40
  10   8   3    1.90    3.20
  10   8   4    2.30    1.80
  10   8   4    8.40    3.80
  10   8   5    1.60    1.90
  10   8   5    6.00    4.00
  10   9  -2    9.40    3.70
  10   9  -1   11.00    3.50
  10   9   0    3.70    3.00
  10   9   1    3.40    3.50
  10   9   2    5.60    3.70
  11   0 -14   91.09    7.30
 -11   0  14   93.09    7.20
  11   0 -13   -0.20    2.90
 -11   0  13    3.40    2.80
  11   0 -12   -2.00    2.60
 -11   0  12   -0.50    2.60
  11   0 -11   -3.20    2.50
 -11   0  11   -3.10    2.30
  11   0 -10   23.60    3.00
 -11   0  10   14.10    2.60
 -11   0   9   -2.30    1.90
  11   0  -9    1.80    2.00
  11   0  -8   69.89    5.00
 -11   0   8   70.99    4.90
 -11   0   7   -0.20    1.60
  11   0  -7    0.90    1.80
 -11   0   6    0.20    1.40
  11   0  -6   -0.80    1.60
  11   0  -5   -2.20    1.30
 -11   0   5    0.30    1.30
  11   0  -4  295.57   15.00
 -11   0   4  300.27   15.00
 -11   0   3   -1.20    1.00
  11   0  -3    0.40    1.20
  11   0  -2   13.90    1.50
 -11   0   2   13.40    1.50
  11   0  -1    0.00    1.00
 -11   0   1   -0.60    0.90
  11   0   0    4.60    1.20
 -11   0   0    4.80    1.00
  11   0   1    0.10    1.00
  11   0   1    1.80    1.10
 -11   0  -1   -0.20    0.80
  11   0   2    7.60    1.40
 -11   0  -2   11.10    1.40
  11   0   2   13.20    1.70
 -11   0  -3    0.00    1.10
  11   0   3    0.00    1.20
  11   0   3    0.30    1.30
  11   0   4   -0.40    1.60
 -11   0  -4   -0.70    1.20
  11   0   4   -1.20    1.20
  11   0   5   -0.50    1.50
 -11   0  -5   -3.20    1.30
 -11   0  -6   -0.20    1.50
  11   0   6   -1.60    1.50
  11   0   7   -3.00    1.60
 -11   0  -7   -1.10    1.50
  11   0   8    0.40    1.70
 -11   0  -8    0.30    1.80
 -11   0  -9   -1.00    1.90
  11   0   9   -0.40    1.90
 -11   0 -10    2.90    2.00
  11   0  10    1.20    2.10
 -11   1  14   20.60    3.70
  11   1 -14   25.30    3.90
  11  -1 -14   21.80    3.70
 -11  -1  14   18.30    3.30
 -11   1  13    3.20    2.90
  11   1 -13   -0.20    3.00
  11  -1 -13   -0.40    2.90
 -11  -1  13    1.90    2.70
 -11   1  12    3.70    2.70
  11   1 -12    4.90    2.80
 -11  -1  12    4.40    2.50
  11  -1 -12    2.90    2.70
 -11   1  11    3.20    2.50
  11   1 -11    9.90    2.70
  11  -1 -11    8.20    2.80
 -11  -1  11    5.00    2.40
  11   1 -10   -2.60    2.30
 -11   1  10    0.00    2.30
  11  -1 -10   -2.10    2.20
 -11  -1  10   -2.40    2.10
  11   1  -9   15.40    2.50
 -11   1   9   16.60    2.60
  11  -1  -9   15.20    2.50
 -11  -1   9   10.60    2.20
 -11   1   8   20.80    2.60
  11   1  -8   35.00    3.10
  11  -1  -8   30.00    3.00
 -11  -1   8   36.10    3.50
  11   1  -7    2.10    1.90
 -11   1   7    4.50    1.60
 -11  -1   7    4.60    1.80
  11  -1  -7    4.50    1.90
 -11   1   6    4.30    1.60
  11   1  -6    3.40    1.60
 -11  -1   6    4.90    1.50
  11  -1  -6    4.30    1.80
  11   1  -5   73.49    4.90
 -11   1   5   79.69    4.80
  11  -1  -5   80.99    4.90
 -11  -1   5   86.49    4.80
 -11   1   4   27.80    2.50
  11   1  -4   26.60    2.60
  11  -1  -4   25.80    2.70
 -11  -1   4   29.40    2.50
  11   1  -3  268.97   14.90
 -11   1   3  313.37   14.90
 -11  -1   3  294.07   14.90
  11  -1  -3  316.07   15.00
 -11   1   2    0.00    0.90
  11   1  -2   -0.40    1.10
 -11  -1   2   -1.30    0.90
  11  -1  -2   -0.40    1.10
 -11   1   1   28.90    2.30
  11   1  -1   30.60    2.50
  11  -1  -1   26.90    2.50
 -11  -1   1   30.50    2.30
 -11   1   0    1.80    0.90
  11   1   0    0.80    1.10
 -11  -1   0    1.60    0.90
  11  -1   0    1.40    1.10
  11  -1   0    2.60    0.70
  11   1   1   74.49    4.50
 -11   1  -1   72.49    4.30
  11  -1   1   72.09    3.80
  11  -1   1   73.49    4.30
 -11  -1  -1   76.49    4.30
  11   1   2   90.29    5.30
 -11   1  -2   86.29    5.10
  11   1   2   94.69    5.30
  11  -1   2   96.19    5.20
 -11  -1  -2   90.29    5.10
  11   1   3    0.30    1.60
  11   1   3   -0.60    1.30
 -11   1  -3   -0.10    1.00
  11  -1   3   -0.30    1.20
 -11  -1  -3   -0.30    1.00
 -11   1  -4   -0.80    1.20
  11   1   4    2.40    1.80
  11   1   4   -1.60    1.30
 -11  -1  -4   -0.30    1.20
  11  -1   4   -1.60    1.20
 -11   1  -5   19.30    2.00
  11   1   5   15.50    2.00
 -11  -1  -5   20.20    2.00
  11  -1   5   15.30    1.90
  11   1   6   -0.70    2.20
 -11   1  -6   -1.40    1.50
  11   1   6   -1.80    1.60
  11  -1   6   -2.90    1.40
 -11  -1  -6    0.10    1.50
  11   1   7    4.40    1.90
 -11   1  -7    1.60    1.60
 -11  -1  -7    3.50    1.60
  11  -1   7    4.00    1.70
  11   1   8    0.60    1.90
 -11   1  -8   -4.20    1.70
  11  -1   8   -2.30    1.60
 -11  -1  -8    0.70    1.70
  11   1   9    1.10    1.90
 -11   1  -9    2.50    2.10
 -11  -1  -9    0.30    1.80
  11  -1   9    0.50    1.80
 -11   1 -10    1.60    2.10
  11   1  10    3.30    2.20
  11  -1  10    1.90    2.00
 -11  -1 -10    1.70    2.10
 -11   2  14    2.10    3.30
  11   2 -14    0.40    3.20
 -11  -2  14    1.50    2.60
  11  -2 -14    2.10    3.00
  11   2 -13   -2.30    2.90
 -11   2  13   -1.20    2.80
 -11  -2  13   -0.50    2.40
  11  -2 -13   -2.00    2.80
  11   2 -12    5.00    2.90
 -11   2  12    3.20    2.80
  11  -2 -12    3.60    2.70
 -11  -2  12    4.40    2.50
 -11   2  11    1.80    2.60
  11   2 -11   -0.60    2.50
  11  -2 -11    1.80    2.40
 -11  -2  11   -2.00    2.10
  11   2 -10   14.00    2.70
 -11   2  10    8.00    2.40
 -11  -2  10   17.80    2.60
  11  -2 -10   15.00    2.80
 -11   2   9    3.50    2.10
  11   2  -9    0.80    2.20
 -11  -2   9    0.20    1.90
  11  -2  -9    0.20    2.10
 -11   2   8   36.80    3.10
  11   2  -8   25.20    2.80
  11  -2  -8   25.30    2.90
 -11  -2   8   27.20    2.70
  11   2  -7   13.00    2.00
 -11   2   7   15.60    2.20
  11  -2  -7   12.50    2.20
 -11  -2   7   11.90    2.00
  11   2  -6  260.67   13.90
 -11   2   6  282.67   14.00
 -11  -2   6  282.27   13.90
  11  -2  -6  265.97   14.00
 -11   2   5   87.99    5.10
  11   2  -5   82.89    5.10
  11  -2  -5   89.09    5.20
  11  -2  -5   81.99    5.50
 -11  -2   5   84.19    5.10
 -11   2   4   10.20    1.50
  11   2  -4    9.10    1.50
  11  -2  -4    9.40    1.70
 -11  -2   4    8.70    1.50
  11  -2  -4   15.40    2.20
 -11   2   3   32.00    2.70
  11   2  -3   33.00    2.70
 -11  -2   3   36.60    2.60
  11  -2  -3   36.70    2.80
  11  -2  -3   35.10    2.80
  11  -2  -3   32.00    2.80
 -11   2   2  139.19    7.00
  11   2  -2  130.09    7.00
 -11  -2   2  130.79    7.00
  11  -2  -2  132.79    6.90
  11  -2  -2  137.59    7.10
  11  -2  -2  125.59    6.90
 -11   2   1   -0.30    1.00
  11   2  -1   -1.30    1.00
 -11  -2   1    0.10    0.90
  11  -2  -1    1.40    0.60
  11  -2  -1   -0.20    0.80
  11  -2  -1    0.10    1.10
 -11   2   0   98.89    6.00
  11   2   0  118.99    6.10
 -11  -2   0  114.79    6.00
  11  -2   0  114.19    5.90
  11  -2   0  113.29    6.10
  11   2   1   26.50    2.80
 -11   2  -1   26.30    2.20
  11   2   1   26.90    2.40
 -11  -2  -1   22.60    2.20
  11  -2   1   26.70    2.40
 -11   2  -2  187.48    9.80
  11   2   2  187.48   10.20
  11   2   2  199.18    9.90
  11  -2   2  198.58    9.80
 -11  -2  -2  178.68    9.80
  11   2   3    1.80    1.90
 -11   2  -3    2.00    1.20
  11   2   3    1.00    1.40
 -11  -2  -3    1.90    1.20
  11  -2   3    1.40    1.30
  11   2   4   15.90    2.60
 -11   2  -4    8.80    1.60
  11   2   4   11.60    1.90
  11  -2   4   12.40    1.70
 -11  -2  -4    9.10    1.50
  11   2   5    2.90    1.70
 -11   2  -5    2.10    1.40
  11   2   5    6.70    2.50
 -11  -2  -5    1.60    1.30
  11  -2   5    2.10    1.40
 -11   2  -6    0.10    1.40
  11   2   6   -0.90    2.30
  11   2   6   -1.00    1.60
  11  -2   6   -0.70    1.30
 -11  -2  -6    0.30    1.40
  11   2   7    1.60    1.90
  11   2   7    1.20    2.70
 -11   2  -7    0.40    1.60
  11  -2   7    0.40    1.50
 -11  -2  -7    0.70    1.50
  11   2   8    1.00    3.10
 -11   2  -8    1.70    2.00
  11   2   8    3.10    2.00
  11  -2   8    2.60    1.70
 -11  -2  -8    0.90    1.70
 -11   2  -9    0.90    2.20
  11   2   9    1.70    2.10
 -11  -2  -9    1.80    1.90
  11  -2   9    1.70    1.80
  11   2  10    1.40    2.20
 -11   2 -10   -1.80    2.20
 -11  -2 -10   -0.90    2.00
  11  -2  10    2.20    2.00
  11   3 -13   -0.60    3.00
 -11   3  13   -2.00    3.00
 -11  -3  13    2.10    2.30
  11  -3 -13    0.90    2.70
  11   3 -12    9.60    3.00
 -11   3  12   12.60    3.20
 -11  -3  12   11.00    2.50
  11  -3 -12   13.30    2.90
  11   3 -11    1.70    2.60
 -11   3  11    5.00    2.70
 -11  -3  11    5.00    2.20
  11  -3 -11    2.50    2.40
  11   3 -10   20.40    2.90
 -11   3  10   18.80    3.00
  11  -3 -10   18.00    2.70
 -11  -3  10   18.20    2.50
 -11   3   9    6.00    2.30
  11   3  -9    3.90    2.20
 -11  -3   9    4.30    1.90
  11  -3  -9    3.40    2.20
  11   3  -8  104.59    6.50
 -11   3   8  101.69    6.60
 -11  -3   8  104.89    6.30
  11  -3  -8  105.79    6.50
 -11   3   7  443.26   23.50
  11   3  -7  455.15   23.40
  11  -3  -7  499.35   23.50
 -11  -3   7  477.15   23.40
  11   3  -6  217.78   11.40
 -11   3   6  222.18   11.40
 -11  -3   6  229.48   11.30
  11  -3  -6  203.38   11.40
  11   3  -5  177.88    9.30
 -11   3   5  164.28    9.30
 -11  -3   5  182.38    9.00
  11  -3  -5  174.28    9.40
  11  -3  -5  176.68    9.60
 -11  -3   5  183.68    9.30
 -11   3   4   12.50    1.60
  11   3  -4   15.30    1.70
  11  -3  -4   15.90    1.90
 -11  -3   4   17.20    1.50
 -11  -3   4   18.10    1.80
  11  -3  -4   13.60    1.50
  11  -3  -4   14.80    2.10
  11   3  -3   12.90    1.50
 -11   3   3    9.20    1.40
  11  -3  -3   15.00    1.70
  11  -3  -3   12.10    1.70
 -11  -3   3   14.40    1.30
  11  -3  -3   14.40    1.30
 -11  -3   3   11.90    1.50
 -11   3   2    9.90    1.30
  11   3  -2   10.10    1.40
  11  -3  -2    5.50    1.40
  11  -3  -2    9.00    1.20
 -11  -3   2    7.50    1.10
  11  -3  -2    7.50    1.00
 -11  -3   2    8.90    1.30
 -11   3   1   13.90    1.40
  11   3  -1    9.00    1.40
  11  -3  -1    9.20    1.40
 -11  -3   1    6.90    1.20
  11  -3  -1    8.80    1.10
 -11  -3   1   10.30    1.20
  11   3   0    7.10    1.40
 -11   3   0    5.20    1.10
  11  -3   0    7.50    1.30
  11  -3   0    7.50    1.10
 -11  -3   0    8.30    1.20
 -11   3  -1    5.00    1.10
  11   3   1    5.10    1.30
  11   3   1    4.70    2.00
 -11  -3  -1    4.10    1.20
  11  -3   1    5.80    1.30
  11  -3   1    5.00    1.00
 -11   3  -2    5.70    1.20
  11   3   2    3.50    1.40
  11   3   2    3.60    2.10
 -11  -3  -2    5.40    1.20
  11  -3   2   -0.20    1.20
  11  -3   2    6.00    1.30
  11   3   3   37.40    4.00
 -11   3  -3   39.70    3.10
  11   3   3   47.50    3.40
 -11  -3  -3   41.70    3.00
  11  -3   3   42.00    3.10
  11   3   4   64.99    4.40
 -11   3  -4   61.59    4.10
  11   3   4   60.19    4.90
 -11  -3  -4   60.49    4.00
  11  -3   4   64.69    4.00
  11   3   5    0.00    2.30
  11   3   5    1.50    1.60
 -11   3  -5   -0.90    1.40
  11  -3   5   -0.60    1.30
 -11  -3  -5   -0.70    1.20
  11   3   6   12.50    2.10
 -11   3  -6   14.70    2.10
  11   3   6   17.20    3.30
  11  -3   6   15.40    1.90
 -11  -3  -6   13.20    1.90
 -11   3  -7    0.90    1.80
  11   3   7    1.90    2.90
  11   3   7    3.70    2.00
 -11  -3  -7    0.30    1.50
  11  -3   7    1.10    1.50
 -11   3  -8   -0.90    1.90
  11   3   8   -1.50    3.20
  11   3   8    1.80    2.10
  11  -3   8    1.50    1.60
 -11  -3  -8   -0.60    1.60
  11   3   9   16.00    4.30
 -11   3  -9   14.50    2.60
  11   3   9   17.80    2.80
  11  -3   9   14.10    2.20
 -11  -3  -9   12.80    2.20
  11   3  10    2.40    2.50
 -11   3 -10   -4.00    2.20
  11  -3  10    2.30    1.90
 -11  -3 -10    1.50    2.00
  11   4 -13   -1.30    3.00
 -11   4  13    2.00    3.10
  11  -4 -13    3.20    2.70
 -11  -4  13    3.90    2.10
 -11   4  12    0.50    2.80
  11   4 -12    1.50    2.70
  11  -4 -12    3.70    2.60
 -11  -4  12    2.50    2.00
  11   4 -11    1.40    2.50
 -11   4  11    4.00    2.60
  11  -4 -11   -0.10    2.20
 -11  -4  11    1.80    1.80
  11   4 -10   19.80    2.90
 -11   4  10   18.50    3.10
 -11  -4  10   18.70    2.40
  11  -4 -10   17.20    2.70
  11   4  -9    1.10    2.10
 -11   4   9    2.30    2.30
 -11  -4   9    0.60    1.70
  11  -4  -9   -0.60    2.00
  11   4  -8   -0.10    1.90
 -11   4   8   -2.00    2.00
 -11  -4   8    0.20    1.60
  11  -4  -8   -0.90    1.80
  11   4  -7    9.60    1.90
 -11   4   7    6.50    2.00
  11  -4  -7    7.10    1.90
 -11  -4   7    5.70    1.60
 -11  -4   7    4.50    1.10
 -11   4   6   43.70    3.80
  11   4  -6   40.80    3.60
  11  -4  -6   44.90    3.70
 -11  -4   6   44.00    2.90
 -11  -4   6   44.00    3.50
 -11   4   5    1.00    1.40
  11   4  -5    0.90    1.40
  11  -4  -5    1.60    1.00
  11  -4  -5    3.50    1.70
 -11  -4   5    1.70    0.90
  11  -4  -5   -0.10    1.60
 -11  -4   5    0.50    1.40
 -11   4   4   -1.10    1.30
  11   4  -4   -1.60    1.20
  11  -4  -4   -2.20    0.80
 -11  -4   4   -3.90    1.20
 -11  -4   4   -1.60    0.80
  11  -4  -4    1.20    1.30
  11  -4  -4   -5.30    1.40
 -11   4   3    1.20    1.20
  11   4  -3    1.80    1.20
 -11  -4   3    3.30    0.90
  11  -4  -3    6.30    1.20
  11  -4  -3    3.40    0.80
  11  -4  -3    1.90    1.40
 -11  -4   3    2.30    1.20
  11   4  -2   18.70    1.80
 -11   4   2   20.40    2.10
 -11  -4   2   20.80    2.20
 -11  -4   2   21.50    1.90
  11  -4  -2   19.80    1.70
  11  -4  -2   21.70    2.00
 -11   4   1   11.40    1.40
  11   4  -1    8.70    1.40
 -11  -4   1    8.60    1.10
  11  -4  -1   10.10    1.10
 -11  -4   1    9.50    1.30
  11  -4  -1    9.70    1.40
 -11   4   0    9.90    1.30
  11   4   0    8.50    1.40
 -11  -4   0   11.60    1.30
 -11  -4   0    9.40    1.30
  11  -4   0   12.80    1.50
  11  -4   0   11.00    1.20
  11   4   1    3.60    2.20
  11   4   1    4.50    1.30
 -11   4  -1    2.80    1.10
  11  -4   1    2.10    1.20
  11  -4   1    2.90    1.00
 -11  -4  -1    5.20    1.30
 -11  -4  -1    5.20    1.20
  11   4   2   42.90    3.20
 -11   4  -2   40.00    3.00
  11   4   2   35.60    4.00
  11  -4   2   42.20    2.80
  11  -4   2   38.60    2.90
 -11  -4  -2   39.90    2.90
 -11   4  -3    1.40    1.20
  11   4   3    1.10    1.40
  11   4   3    1.30    2.40
  11  -4   3    2.60    1.20
 -11  -4  -3    2.30    1.20
  11  -4   3    2.60    1.10
  11   4   4    0.30    1.60
 -11   4  -4    0.50    1.20
  11   4   4    1.80    2.50
  11  -4   4    1.40    1.30
 -11  -4  -4    1.00    1.20
  11   4   5    1.20    1.70
  11   4   5    2.90    2.70
 -11   4  -5    1.50    1.40
 -11  -4  -5    3.00    1.30
  11  -4   5    2.20    1.30
  11   4   6    0.00    1.80
 -11   4  -6    0.30    1.50
  11   4   6   -0.70    2.70
  11  -4   6    0.90    1.30
 -11  -4  -6    1.60    1.40
  11   4   7    1.80    2.10
  11   4   7   -0.90    2.90
 -11   4  -7    0.30    1.70
  11  -4   7   -0.40    1.50
 -11  -4  -7   -0.70    1.50
  11   4   8   10.00    2.50
 -11   4  -8    5.70    2.20
  11   4   8    8.80    3.80
  11  -4   8    9.20    1.90
 -11  -4  -8    9.40    2.00
  11   4   9   -0.80    3.80
 -11   4  -9    1.90    2.30
  11   4   9    6.30    2.50
 -11  -4  -9    5.90    2.00
  11  -4   9    3.60    1.70
  11   5 -12    0.10    2.80
 -11   5  12    0.80    3.00
  11  -5 -12   -1.40    2.30
  11   5 -11   35.20    3.70
 -11   5  11   30.00    3.80
  11  -5 -11   28.60    3.30
 -11  -5  11   39.70    3.30
  11   5 -10    5.20    2.40
 -11   5  10    9.70    2.80
 -11  -5  10    5.30    1.60
  11  -5 -10    5.30    2.20
 -11   5   9    2.00    2.30
  11   5  -9    0.80    2.10
 -11  -5   9    0.70    1.30
  11  -5  -9    2.70    1.90
  11   5  -8  104.69    6.50
 -11   5   8  102.29    6.80
 -11  -5   8  113.19    6.00
  11  -5  -8  103.69    6.40
 -11   5   7    5.70    2.00
  11   5  -7    4.90    1.80
 -11  -5   7    5.10    1.40
  11  -5  -7    5.20    1.70
  11   5  -6   73.29    4.90
 -11   5   6   77.39    5.20
  11  -5  -6   85.49    4.90
 -11  -5   6   75.39    4.60
 -11   5   5   34.10    3.30
  11   5  -5   37.50    3.20
  11  -5  -5   42.00    3.30
 -11  -5   5   38.00    2.60
  11  -5  -5   37.00    2.50
 -11  -5   5   35.90    2.90
  11   5  -4   49.00    3.50
 -11   5   4   49.60    3.60
  11  -5  -4   46.50    2.90
 -11  -5   4   50.09    3.30
 -11  -5   4   44.10    2.90
  11  -5  -4   50.29    3.50
  11  -5  -4   51.39    3.40
  11   5  -3   14.50    1.70
 -11   5   3   16.80    1.70
 -11  -5   3   12.40    1.50
  11  -5  -3    9.70    1.50
  11  -5  -3   10.90    1.10
 -11  -5   3   13.80    1.20
 -11   5   2   14.10    1.60
  11   5  -2   11.40    1.60
 -11  -5   2   15.10    1.50
 -11  -5   2   14.10    1.30
  11  -5  -2   13.40    1.20
  11  -5  -2   13.70    1.50
  11   5  -1   78.79    4.80
 -11   5   1   75.89    4.70
 -11  -5   1   81.49    4.50
  11  -5  -1   82.89    4.60
 -11  -5   1   88.29    4.60
  11   5   0    1.20    2.50
 -11   5   0    3.30    1.10
  11   5   0    2.50    1.20
 -11  -5   0    3.30    1.00
  11  -5   0    3.30    0.90
  11  -5   0    4.30    1.10
 -11  -5   0    2.90    1.10
  11   5   1   26.20    3.50
  11   5   1   19.20    1.90
 -11   5  -1   15.40    1.70
 -11  -5  -1   19.80    1.70
 -11  -5  -1   23.10    2.20
  11  -5   1   22.40    1.90
  11  -5   1   19.60    2.00
  11   5   2   14.70    2.90
  11   5   2   10.90    1.70
 -11   5  -2   14.70    1.70
 -11  -5  -2   15.00    1.60
 -11  -5  -2   17.80    1.90
  11  -5   2   12.70    1.40
  11   5   3   44.10    3.60
  11   5   3   45.60    4.70
 -11   5  -3   37.90    3.20
  11  -5   3   43.40    2.90
 -11  -5  -3   42.10    3.20
  11   5   4   11.00    3.20
 -11   5  -4    4.30    1.40
  11   5   4    7.20    1.80
  11  -5   4    4.00    1.20
 -11  -5  -4    8.00    1.40
  11   5   5    8.90    2.00
 -11   5  -5    4.20    1.60
  11   5   5    7.30    3.10
 -11  -5  -5    6.40    1.50
  11  -5   5    3.80    1.20
  11   5   6    5.60    3.20
 -11   5  -6   -1.20    1.50
  11   5   6    1.10    2.00
 -11  -5  -6    0.20    1.30
  11  -5   6    0.50    1.20
  11   5   7    1.60    2.10
  11   5   7   -1.70    3.40
 -11   5  -7   -1.30    1.70
  11  -5   7   -0.70    1.40
 -11  -5  -7   -1.00    1.50
 -11   5  -8   21.00    2.70
  11   5   8   14.70    2.80
  11   5   8   18.20    4.40
 -11  -5  -8   21.80    2.40
  11   6 -11   -4.10    2.50
 -11   6  11   -0.10    2.80
  11  -6 -11    1.00    2.00
  11   6 -10   -0.80    2.30
 -11   6  10   -2.90    2.50
  11  -6 -10    1.80    1.80
  11   6  -9    4.30    2.20
 -11   6   9    1.70    2.40
  11  -6  -9    4.90    1.70
 -11   6   8   31.50    3.20
  11   6  -8   28.10    3.00
  11  -6  -8   37.30    3.10
 -11   6   7   -1.30    1.80
  11   6  -7    0.70    1.70
  11  -6  -7   -0.50    1.30
 -11   6   6    3.20    1.80
  11   6  -6    4.90    1.70
  11  -6  -6    6.20    1.30
  11   6  -5   27.70    2.50
 -11   6   5   31.70    3.20
  11  -6  -5   33.10    2.40
  11   6  -4    3.30    1.30
 -11   6   4    4.40    1.50
  11  -6  -4    3.90    0.90
 -11  -6   4    3.40    0.70
  11   6  -3   30.40    2.70
 -11   6   3   29.20    2.70
 -11  -6   3   31.70    1.90
  11  -6  -3   28.90    1.90
  11   6  -2    0.50    1.10
 -11   6   2    2.00    1.10
 -11  -6   2    0.00    0.80
  11   6  -1    8.20    1.40
 -11   6   1    6.60    1.20
 -11  -6   1    7.00    1.00
  11   6   0   -1.10    2.30
  11   6   0    0.40    1.10
 -11   6   0    0.50    1.00
 -11  -6   0    0.00    0.90
  11   6   1   36.10    4.30
 -11   6  -1   40.10    2.90
  11   6   1   37.90    3.20
 -11  -6  -1   38.00    2.60
 -11   6  -2   24.50    2.40
  11   6   2   21.40    3.50
  11   6   2   18.90    2.10
 -11  -6  -2   22.80    2.10
 -11   6  -3   -0.60    1.10
  11   6   3   -0.80    1.40
  11   6   3    0.10    2.60
 -11  -6  -3    0.20    1.00
 -11   6  -4   -0.40    1.30
  11   6   4    4.00    3.00
  11   6   4    3.70    1.80
 -11  -6  -4    2.10    1.20
  11   6   5    5.10    3.30
 -11   6  -5    0.10    1.40
  11   6   5    2.10    1.80
 -11  -6  -5   -0.40    1.20
  11   6   6    7.00    3.50
 -11   6  -6    3.10    1.70
  11   6   6    3.40    2.20
 -11  -6  -6    2.30    1.40
  11   6   7    5.10    3.80
 -11   6  -7    4.40    1.90
  11   6   7    0.80    2.40
 -11  -6  -7    0.90    1.60
 -11   7  10   17.80    3.20
 -11   7   9    0.60    2.40
  11   7  -9    1.40    2.40
 -11   7   8    6.30    2.40
  11   7  -8    5.30    2.10
  11   7  -7    3.00    1.90
 -11   7   7    2.60    2.10
  11   7  -6   -0.20    1.60
 -11   7   6   -3.80    1.70
 -11   7   5   -1.20    1.50
  11   7  -5   -1.10    1.30
  11   7  -4    2.10    1.30
 -11   7   4   -1.50    1.30
  11   7  -3    1.70    1.20
 -11   7   3    0.60    1.30
 -11   7   2    3.00    1.30
  11   7  -2    2.80    1.20
  11   7  -1    9.40    3.10
  11   7  -1    8.50    1.40
 -11   7   1    7.80    1.40
  11   7   0   29.20    2.80
 -11   7   0   28.30    2.50
  11   7   0   33.30    4.30
  11   7   1   43.40    3.50
  11   7   1   54.19    5.30
 -11   7  -1   40.10    3.10
  11   7   2   51.39    4.00
 -11   7  -2   50.89    3.60
  11   7   2   61.89    5.70
  11   7   3   -0.40    1.50
 -11   7  -3   -1.10    1.20
  11   7   3    3.30    3.10
 -11   7  -4    3.70    1.60
  11   7   4   10.70    3.70
  11   7   4    2.90    1.80
  11   7   5    4.00    3.60
  11   7   5    4.70    2.00
  11   7   6   26.50    4.90
  11   7   6   20.10    2.80
 -11   8   8    1.20    3.60
  11   8  -1    3.70    3.30
  11   8   0    0.00    1.40
  11   8   0    5.50    3.40
  11   8   1   12.80    3.60
  11   8   1   10.60    1.70
  11   8   2    4.30    3.40
  11   8   2    0.30    1.40
  11   8   3    0.40    1.50
  11   8   3    1.70    3.40
  11   8   4    2.90    3.50
  11   8   4   -0.40    1.70
  11   9  -2    6.80    3.60
  11   9  -1    2.50    3.60
  11   9   0    3.90    3.40
  11   9   1    4.70    3.60
  12   0 -14    9.70    3.30
 -12   0  14    8.80    3.20
  12   0 -13   -0.80    3.00
 -12   0  13    3.50    2.90
 -12   0  12   11.10    3.00
  12   0 -12    4.90    2.90
  12   0 -11   -3.50    2.50
 -12   0  11   -1.00    2.40
  12   0 -10   -0.10    2.40
 -12   0  10   -0.80    2.10
  12   0  -9    1.40    2.00
 -12   0   9   -3.20    1.90
  12   0  -8   -1.10    1.90
 -12   0   8    2.10    1.90
  12   0  -7   -0.90    1.80
 -12   0   7   -0.40    1.60
  12   0  -6    2.70    1.60
 -12   0   6    2.90    1.60
  12   0  -5    0.50    1.40
 -12   0   5    2.60    1.40
 -12   0   4  112.19    6.20
  12   0  -4  112.69    6.30
  12   0  -3    0.60    1.30
 -12   0   3    1.20    1.10
  12   0  -2   97.99    5.70
 -12   0   2  109.59    5.70
  12   0  -1   -0.30    1.10
 -12   0   1    0.20    1.10
  12   0   0    4.60    1.20
  12   0   0    5.90    1.20
 -12   0   0    3.60    1.00
 -12   0  -1    0.60    1.00
  12   0   1    0.60    1.10
  12   0   1    0.40    1.20
 -12   0  -2    0.20    1.10
  12   0   2    0.20    1.20
  12   0   2    2.70    1.20
  12   0   3   -2.40    1.20
  12   0   3    0.10    1.40
 -12   0  -3   -2.40    1.10
  12   0   4    4.90    1.90
 -12   0  -4    3.50    1.40
  12   0   4    3.80    1.60
 -12   0  -5   -2.20    1.30
  12   0   5   -0.30    1.50
  12   0   6   10.40    2.00
 -12   0  -6    9.10    1.90
 -12   0  -7   -1.50    1.50
  12   0   7    0.00    1.70
  12   0   8    1.50    1.80
 -12   0  -8    0.60    1.80
 -12   0  -9   -1.90    1.90
  12   0   9   -2.20    1.90
  12   0  10    4.20    2.20
 -12   0 -10    7.00    2.30
  12   1 -14    8.10    3.30
 -12   1  14    1.60    3.20
  12  -1 -14    3.80    3.30
 -12  -1  14   10.40    3.00
  12   1 -13   -2.40    3.00
 -12   1  13    0.80    2.90
  12  -1 -13   -5.30    2.80
 -12  -1  13    0.10    2.70
 -12   1  12   -4.30    2.50
  12   1 -12   -2.00    2.60
 -12  -1  12   -1.30    2.50
  12  -1 -12   -4.10    2.70
  12   1 -11   -3.80    2.40
 -12   1  11   -2.90    2.30
 -12  -1  11   -0.40    2.30
  12  -1 -11   -2.90    2.50
 -12   1  10   28.40    3.30
  12   1 -10   24.80    3.10
  12  -1 -10   22.80    3.10
 -12  -1  10   25.50    3.10
 -12   1   9    2.20    2.10
  12   1  -9    0.10    2.10
  12  -1  -9    1.50    2.10
 -12  -1   9    1.70    2.10
 -12   1   8   36.40    3.80
  12   1  -8   37.90    3.90
 -12  -1   8   40.60    3.80
  12  -1  -8   40.00    3.50
 -12   1   7   13.10    2.20
  12   1  -7   20.10    2.40
  12  -1  -7   19.70    2.50
 -12  -1   7   19.80    2.30
  12   1  -6    4.10    1.70
 -12   1   6    6.90    1.80
  12  -1  -6    8.80    1.90
 -12  -1   6    5.20    1.70
 -12   1   5   98.89    5.60
  12   1  -5  100.19    5.70
 -12  -1   5   88.69    5.50
  12  -1  -5   93.59    5.70
  12   1  -4   61.99    4.00
 -12   1   4   57.59    3.90
  12  -1  -4   62.19    4.20
 -12  -1   4   61.59    3.90
 -12   1   3   11.10    1.50
  12   1  -3   10.10    1.50
 -12  -1   3    8.60    1.40
  12  -1  -3   11.80    1.70
 -12   1   2   11.10    1.50
  12   1  -2   13.20    1.60
 -12  -1   2   14.60    1.60
  12  -1  -2   12.50    1.60
 -12   1   1   -0.60    1.00
  12   1  -1   -0.40    1.10
  12  -1  -1   -0.90    1.10
 -12  -1   1   -0.20    1.00
  12   1   0    2.90    1.30
 -12   1   0    0.70    1.00
 -12  -1   0    2.30    1.10
  12  -1   0    1.50    0.80
  12  -1   0   -0.10    1.10
  12   1   1  183.18    9.60
  12   1   1  194.88    9.50
 -12   1  -1  176.08    9.40
 -12  -1  -1  180.98    9.40
  12  -1   1  175.58    9.00
  12  -1   1  184.18    9.50
  12   1   2   64.49    4.20
 -12   1  -2   62.69    4.00
 -12  -1  -2   59.09    4.00
  12  -1   2   68.89    4.20
 -12   1  -3   18.90    1.90
  12   1   3   24.10    2.70
  12   1   3   12.80    1.80
 -12  -1  -3   16.30    1.80
  12  -1   3   14.50    1.80
  12   1   4   -0.50    1.40
 -12   1  -4    1.30    1.30
  12   1   4    2.20    2.00
 -12  -1  -4   -0.90    1.30
  12  -1   4    1.60    1.50
  12   1   5   -0.30    2.00
 -12   1  -5   -4.60    1.30
  12   1   5   -2.30    1.50
 -12  -1  -5    0.60    1.40
  12  -1   5   -2.30    1.40
  12   1   6    8.70    2.60
 -12   1  -6    9.80    1.90
  12   1   6    4.20    1.80
 -12  -1  -6    7.40    1.80
  12  -1   6    6.90    1.80
  12   1   7   -2.10    1.70
 -12   1  -7   -0.80    1.60
  12  -1   7   -3.40    1.60
 -12  -1  -7   -2.40    1.50
 -12   1  -8   -1.00    1.90
  12   1   8    2.40    2.00
  12  -1   8   -0.40    1.70
 -12  -1  -8   -2.30    1.70
  12   1   9   -1.90    2.00
 -12   1  -9   -1.00    2.10
 -12  -1  -9    1.60    1.90
  12  -1   9   -1.40    1.80
 -12   1 -10    5.00    2.20
  12   1  10    4.10    2.30
  12  -1  10    2.20    2.20
 -12  -1 -10    1.60    2.10
 -12   2  13   -1.80    3.00
  12   2 -13   -4.50    3.00
 -12  -2  13    2.20    2.60
  12  -2 -13   -4.20    2.80
  12   2 -12   -0.10    2.80
 -12   2  12    4.10    2.90
  12  -2 -12   -1.70    2.50
 -12  -2  12   -1.10    2.30
  12   2 -11   14.90    3.10
 -12   2  11   14.00    3.00
 -12  -2  11   10.30    2.70
  12  -2 -11   16.30    2.90
 -12   2  10    0.20    2.20
  12   2 -10   -0.90    2.20
 -12  -2  10   -0.70    2.10
  12  -2 -10   -2.50    2.30
 -12   2   9    7.00    2.20
  12   2  -9    7.10    2.30
 -12  -2   9    8.60    2.20
  12  -2  -9    4.20    2.30
  12   2  -8  151.78    8.80
 -12   2   8  168.48    8.80
 -12  -2   8  150.78    8.70
  12  -2  -8  152.08    8.80
  12   2  -7  180.28    9.70
 -12   2   7  174.88    9.70
 -12  -2   7  179.08    9.60
  12  -2  -7  177.08    9.70
 -12   2   6   96.09    5.50
  12   2  -6   86.09    5.50
 -12  -2   6   85.39    5.50
  12  -2  -6   87.49    5.60
  12   2  -5  244.28   12.50
 -12   2   5  258.07   12.50
  12  -2  -5  233.58   12.50
 -12  -2   5  240.18   12.40
  12  -2  -5  232.78   12.80
 -12   2   4   57.69    4.10
  12   2  -4   73.79    4.30
 -12  -2   4   69.69    4.20
  12  -2  -4   68.89    4.60
  12  -2  -4   69.59    4.50
  12   2  -3   46.90    3.40
 -12   2   3   50.49    3.30
  12  -2  -3   47.20    3.40
 -12  -2   3   45.70    3.40
  12  -2  -3   50.09    3.60
 -12   2   2   21.30    2.30
  12   2  -2   29.50    2.60
  12  -2  -2   29.00    2.60
 -12  -2   2   25.80    2.40
  12  -2  -2   25.10    2.20
  12   2  -1  128.99    6.80
 -12   2   1  127.99    6.70
  12  -2  -1  122.99    6.20
  12  -2  -1  123.99    6.80
 -12  -2   1  124.49    6.70
  12   2   0   16.70    1.90
 -12   2   0   23.60    2.20
 -12  -2   0   22.40    2.20
  12  -2   0   23.60    2.40
 -12   2  -1   67.49    4.20
  12   2   1   69.49    4.80
  12   2   1   78.49    4.50
 -12  -2  -1   72.39    4.30
  12  -2   1   70.19    4.40
  12   2   2   12.80    2.30
  12   2   2    9.90    1.50
 -12   2  -2    9.80    1.50
 -12  -2  -2   12.70    1.60
  12  -2   2   11.70    1.70
 -12   2  -3  167.48    9.10
  12   2   3  170.68    9.50
  12   2   3  173.18    9.20
 -12  -2  -3  173.58    9.10
  12  -2   3  178.38    9.10
 -12   2  -4   53.99    3.70
  12   2   4   52.69    4.40
  12   2   4   51.39    4.00
  12  -2   4   55.19    3.80
 -12  -2  -4   48.10    3.70
 -12   2  -5   -0.60    1.40
  12   2   5    0.40    1.70
  12   2   5    3.00    2.30
  12  -2   5    2.60    1.50
 -12  -2  -5   -0.60    1.30
 -12   2  -6    1.40    1.60
  12   2   6    1.80    2.50
  12   2   6    0.20    1.80
  12  -2   6    2.20    1.60
 -12  -2  -6    1.20    1.50
 -12   2  -7   -2.30    1.60
  12   2   7    0.80    1.90
  12   2   7   -1.90    2.70
 -12  -2  -7    0.00    1.60
  12  -2   7    0.40    1.60
 -12   2  -8   10.30    2.30
  12   2   8    8.70    2.40
 -12  -2  -8    9.70    2.10
  12  -2   8    7.20    2.00
 -12   2  -9    1.00    2.20
  12   2   9    1.80    2.10
  12  -2   9    1.10    1.90
 -12  -2  -9    1.80    1.90
  12   3 -13    3.80    3.10
 -12   3  13    5.90    3.30
 -12  -3  13    6.70    2.50
  12  -3 -13    4.00    2.90
  12   3 -12    1.40    2.70
 -12   3  12    2.40    2.80
 -12  -3  12    5.10    2.40
  12  -3 -12    0.90    2.70
  12   3 -11    2.40    2.50
 -12   3  11    0.40    2.50
  12  -3 -11    0.40    2.30
 -12  -3  11    2.10    2.20
 -12   3  10    1.00    2.50
  12   3 -10    2.10    2.40
  12  -3 -10    2.10    2.30
 -12  -3  10    2.60    2.10
 -12   3   9   39.30    3.60
  12   3  -9   32.80    3.40
  12  -3  -9   41.00    4.10
 -12  -3   9   33.20    3.20
  12   3  -8   95.29    6.30
 -12   3   8  104.59    6.40
  12  -3  -8  106.39    6.50
 -12  -3   8   98.89    6.20
 -12   3   7   21.20    2.50
  12   3  -7   15.20    2.30
 -12  -3   7   17.20    2.20
  12  -3  -7   15.60    2.40
 -12   3   6   23.80    2.50
  12   3  -6   32.70    2.80
 -12  -3   6   27.10    2.50
  12  -3  -6   27.60    2.70
  12   3  -5   63.29    4.40
 -12   3   5   63.59    4.50
 -12  -3   5   67.69    4.40
  12  -3  -5   63.29    4.70
  12  -3  -5   71.79    4.60
  12   3  -4    5.80    1.50
 -12   3   4    2.40    1.30
 -12  -3   4    5.50    1.50
  12  -3  -4    6.50    1.70
  12  -3  -4    4.40    1.70
 -12   3   3    9.80    1.50
  12   3  -3    8.80    1.60
 -12  -3   3    7.80    1.50
  12  -3  -3   12.90    1.50
  12  -3  -3    6.90    1.70
 -12   3   2    0.60    1.10
  12   3  -2    0.50    1.20
  12  -3  -2    0.70    0.70
  12  -3  -2   -0.90    1.30
  12  -3  -2   -0.30    0.90
 -12  -3   2   -1.00    1.10
 -12   3   1   25.70    2.30
  12   3  -1   25.50    2.50
  12  -3  -1   25.80    2.10
  12  -3  -1   25.90    2.70
 -12  -3   1   25.50    2.40
  12   3   0    3.50    1.30
 -12   3   0    5.10    1.20
  12  -3   0    4.70    1.40
  12  -3   0    4.90    1.20
 -12  -3   0    5.70    1.30
  12   3   1   16.20    1.80
  12   3   1   14.90    2.60
 -12   3  -1   17.50    1.70
  12  -3   1   13.50    1.80
 -12  -3  -1   19.20    1.80
  12   3   2   13.60    2.50
 -12   3  -2   10.30    1.50
  12   3   2    9.90    1.60
 -12  -3  -2   10.20    1.50
  12  -3   2    9.30    1.60
 -12   3  -3   33.30    3.00
  12   3   3   35.50    3.20
  12   3   3   36.20    3.90
 -12  -3  -3   33.80    3.00
  12  -3   3   34.30    3.00
  12   3   4    8.30    1.70
 -12   3  -4   11.00    1.70
  12   3   4   13.50    2.80
  12  -3   4   11.90    1.70
 -12  -3  -4    9.60    1.60
  12   3   5    9.80    2.80
  12   3   5    7.00    1.90
 -12   3  -5    6.80    1.70
 -12  -3  -5    8.80    1.70
  12  -3   5    6.60    1.70
 -12   3  -6    0.00    1.50
  12   3   6    0.60    1.80
  12   3   6    0.40    2.70
  12  -3   6   -1.70    1.40
 -12  -3  -6    1.10    1.50
  12   3   7    0.00    2.90
  12   3   7   -0.40    1.90
 -12   3  -7    2.20    1.80
 -12  -3  -7   -0.70    1.60
  12  -3   7   -0.30    1.50
  12   3   8    2.20    2.20
  12   3   8    5.10    3.60
 -12   3  -8    4.10    2.10
  12  -3   8    4.30    1.80
 -12  -3  -8    3.50    1.80
 -12   3  -9    0.20    2.10
  12   3   9   -2.80    3.80
  12   3   9    2.20    2.30
  12  -3   9    2.60    1.90
 -12  -3  -9    1.30    1.90
  12   4 -13   -5.80    2.80
 -12   4  13   -3.40    3.10
 -12  -4  13    3.10    2.10
  12  -4 -13    2.90    2.70
  12   4 -12    6.60    3.00
 -12   4  12    8.30    3.00
 -12  -4  12    7.00    2.20
  12  -4 -12    7.50    2.70
  12   4 -11    1.50    2.50
 -12   4  11    1.00    2.60
 -12  -4  11    0.30    1.90
  12  -4 -11    1.80    2.40
  12   4 -10    8.00    2.50
 -12   4  10    7.60    2.70
  12  -4 -10    8.80    2.50
 -12  -4  10    8.10    2.00
 -12   4   9   31.70    3.40
  12   4  -9   38.80    3.50
  12  -4  -9   33.00    3.20
 -12  -4   9   33.90    3.60
 -12   4   8    3.90    2.10
  12   4  -8    3.40    2.00
 -12  -4   8    5.60    1.80
  12  -4  -8    6.30    2.10
 -12   4   7    2.40    1.90
  12   4  -7    2.00    1.80
 -12  -4   7    4.50    1.70
  12  -4  -7    4.30    1.90
  12   4  -6   38.70    3.40
 -12   4   6   35.70    3.40
 -12  -4   6   36.70    3.40
  12  -4  -6   36.90    3.60
 -12  -4   6   35.80    2.70
 -12   4   5   -1.40    1.40
  12   4  -5    0.10    1.40
  12  -4  -5    1.80    1.60
 -12  -4   5   -0.60    1.40
 -12  -4   5    0.50    0.90
  12  -4  -5    1.70    1.60
  12   4  -4    9.50    1.60
 -12   4   4    7.70    1.50
 -12  -4   4    7.40    1.10
  12  -4  -4   11.00    1.70
  12  -4  -4    8.80    1.20
  12  -4  -4    5.90    1.70
 -12  -4   4    9.30    1.60
  12   4  -3    2.00    1.30
 -12   4   3   -0.90    1.20
  12  -4  -3    0.80    0.80
 -12  -4   3   -1.50    1.20
  12  -4  -3    3.20    1.10
  12  -4  -3   -2.10    1.40
 -12  -4   3    1.70    0.90
  12   4  -2   34.00    2.80
 -12   4   2   34.20    2.80
  12  -4  -2   31.50    3.00
 -12  -4   2   35.10    2.40
 -12  -4   2   30.40    2.70
  12  -4  -2   32.80    2.30
 -12   4   1    0.80    1.10
  12   4  -1    1.80    1.30
  12  -4  -1    3.50    0.90
 -12  -4   1    1.80    0.90
  12  -4  -1    1.00    1.30
 -12  -4   1    2.20    1.20
  12   4   0    8.90    2.50
  12   4   0    5.60    1.40
 -12   4   0    8.30    1.30
 -12  -4   0    8.40    1.40
  12  -4   0    6.80    1.40
  12  -4   0    7.80    1.10
  12   4   1    3.40    1.30
 -12   4  -1    5.40    1.30
  12   4   1    6.80    2.50
 -12  -4  -1    6.90    1.30
  12  -4   1    4.00    1.30
  12  -4   1    6.10    1.20
  12   4   2    3.80    1.50
 -12   4  -2    6.80    1.30
  12   4   2    8.10    2.50
  12  -4   2    4.70    1.20
 -12  -4  -2    5.20    1.40
  12  -4   2    4.40    1.40
  12   4   3    0.40    1.40
  12   4   3    0.00    2.30
 -12   4  -3   -1.30    1.20
 -12  -4  -3   -0.70    1.20
  12  -4   3    2.60    1.30
  12   4   4    2.00    2.50
 -12   4  -4    2.70    1.40
  12   4   4    2.50    1.60
  12  -4   4    0.10    1.30
 -12  -4  -4    0.60    1.30
  12   4   5    5.10    1.80
 -12   4  -5    6.60    1.70
  12   4   5   12.00    3.10
 -12  -4  -5    7.00    1.60
  12  -4   5    7.40    1.60
  12   4   6   -0.90    1.80
 -12   4  -6    1.20    1.70
  12   4   6    4.00    3.00
 -12  -4  -6    2.40    1.50
  12  -4   6    0.70    1.50
  12   4   7    3.30    2.30
  12   4   7    1.40    3.20
 -12   4  -7    0.50    1.80
  12  -4   7    0.40    1.60
 -12  -4  -7    1.10    1.60
  12   4   8    1.70    2.30
  12   4   8    1.00    3.60
 -12   4  -8    2.90    2.10
  12  -4   8    0.90    1.70
 -12  -4  -8    3.30    1.80
  12   5 -12    8.20    3.00
 -12   5  12    6.20    3.10
  12  -5 -12    8.50    2.60
  12   5 -11    3.20    2.70
 -12   5  11    5.80    2.80
  12  -5 -11    3.70    2.30
 -12  -5  11    2.70    1.60
  12   5 -10   -1.90    2.30
 -12   5  10    2.30    2.60
 -12  -5  10    3.40    1.50
  12  -5 -10    2.40    2.20
 -12   5   9   12.60    2.60
  12   5  -9   14.10    2.60
 -12  -5   9   13.90    1.90
  12  -5  -9   13.10    2.30
 -12   5   8   21.00    2.90
  12   5  -8   25.30    2.80
 -12  -5   8   28.20    2.90
  12  -5  -8   29.20    2.80
  12   5  -7   24.90    2.50
 -12   5   7   23.00    2.70
  12  -5  -7   15.20    2.20
 -12  -5   7   17.70    2.00
  12   5  -6    0.20    1.50
 -12   5   6    0.30    1.70
 -12  -5   6   -2.20    1.20
  12  -5  -6    0.80    1.60
 -12   5   5    0.80    1.50
  12   5  -5    1.00    1.40
 -12  -5   5    1.50    1.30
  12  -5  -5    0.40    1.50
 -12   5   4    4.60    1.50
  12   5  -4    4.50    1.50
  12  -5  -4    1.10    1.40
  12  -5  -4    7.00    1.90
 -12  -5   4    3.10    1.30
 -12   5   3  101.59    5.70
  12   5  -3  102.69    5.80
 -12  -5   3   99.99    5.60
 -12  -5   3   98.09    5.60
  12  -5  -3  101.79    5.60
  12  -5  -3  103.69    5.70
  12   5  -2    0.70    1.20
 -12   5   2    0.50    1.20
 -12  -5   2    0.20    0.80
  12  -5  -2   -1.70    1.10
  12  -5  -2   -0.30    0.80
 -12  -5   2   -0.50    1.10
  12   5  -1    9.60    1.60
 -12   5   1    7.10    1.30
 -12  -5   1   10.00    1.40
 -12  -5   1   10.00    1.30
  12  -5  -1    7.60    1.30
  12   5   0   37.50    4.10
  12   5   0   34.50    2.80
 -12   5   0   27.70    2.50
  12  -5   0   28.30    2.50
 -12  -5   0   24.90    2.50
 -12  -5   0   27.20    2.50
  12   5   1    1.60    2.60
  12   5   1    1.50    1.30
 -12   5  -1    1.70    1.10
 -12  -5  -1    1.80    1.20
  12  -5   1    1.80    1.10
  12   5   2   35.40    3.30
  12   5   2   39.60    4.40
 -12   5  -2   36.50    3.00
  12  -5   2   37.80    2.70
 -12  -5  -2   30.00    2.90
 -12   5  -3    8.60    1.60
  12   5   3   14.90    3.20
  12   5   3    9.70    1.80
 -12  -5  -3   12.10    1.60
  12  -5   3    9.50    1.40
  12   5   4    0.40    2.70
 -12   5  -4    0.20    1.30
  12   5   4    0.80    1.70
 -12  -5  -4    0.50    1.30
  12  -5   4   -2.70    1.10
  12   5   5    2.80    3.00
  12   5   5   -0.10    1.80
 -12   5  -5    0.10    1.50
 -12  -5  -5   -0.50    1.30
  12  -5   5    0.00    1.20
 -12   5  -6    5.50    1.80
  12   5   6   12.50    3.70
  12   5   6    8.60    2.40
  12  -5   6    5.50    1.40
 -12  -5  -6    7.50    1.70
  12   5   7    7.80    3.80
  12   5   7    8.10    2.40
 -12   5  -7    8.50    2.10
 -12  -5  -7    4.90    1.80
  12   5   8    2.40    2.40
  12   5   8    3.40    3.80
 -12   5  -8   -0.40    2.00
 -12  -5  -8    2.00    1.80
  12   6 -11    2.30    2.70
 -12   6  11    5.00    2.90
  12  -6 -11    1.50    2.10
  12   6 -10    0.80    2.50
 -12   6  10    3.50    2.70
  12  -6 -10    0.20    1.80
  12   6  -9   25.40    3.10
 -12   6   9   22.70    3.20
  12  -6  -9   25.00    2.50
 -12   6   8    5.30    2.30
  12   6  -8    2.00    2.10
  12  -6  -8    3.50    1.60
 -12   6   7    1.80    2.00
  12   6  -7    0.10    1.80
  12  -6  -7   -0.20    1.30
  12   6  -6   -2.20    1.50
 -12   6   6   -1.70    1.70
  12  -6  -6   -0.40    1.20
  12   6  -5    0.70    1.40
 -12   6   5    2.60    1.50
  12  -6  -5    1.10    1.10
 -12  -6   5    0.70    0.90
  12   6  -4    9.70    1.70
 -12   6   4    7.90    1.70
 -12  -6   4   12.40    1.20
  12  -6  -4   10.20    1.30
  12   6  -3   41.20    3.30
 -12   6   3   39.00    3.30
  12  -6  -3   39.30    2.60
 -12  -6   3   44.10    2.70
  12   6  -2    5.40    1.40
 -12   6   2    5.40    1.30
  12  -6  -2    6.60    0.90
 -12  -6   2    7.10    1.10
 -12   6   1    9.30    1.40
  12   6  -1    8.20    1.50
 -12  -6   1    8.10    1.20
  12   6   0   12.00    3.10
  12   6   0    8.70    1.50
 -12   6   0    6.30    1.30
 -12  -6   0    9.60    1.20
  12   6   1    2.00    1.40
 -12   6  -1    2.80    1.20
  12   6   1    2.80    2.50
 -12  -6  -1    1.50    1.00
 -12   6  -2   51.79    3.60
  12   6   2   56.29    4.00
  12   6   2   54.39    5.20
 -12  -6  -2   49.70    3.40
 -12   6  -3    8.30    1.60
  12   6   3    8.40    1.80
  12   6   3   17.40    3.50
 -12  -6  -3   11.10    1.50
 -12   6  -4    2.40    1.40
  12   6   4    9.20    3.40
  12   6   4    2.70    1.80
 -12  -6  -4    4.20    1.30
  12   6   5   18.50    2.60
  12   6   5   33.00    4.70
 -12   6  -5   22.30    2.40
 -12  -6  -5   25.40    2.30
 -12   6  -6    5.40    1.80
  12   6   6   10.60    3.70
  12   6   6    4.50    2.30
 -12  -6  -6    5.30    1.60
  12   6   7    2.70    2.40
  12   6   7    3.70    3.90
 -12   6  -7    1.60    1.90
 -12  -6  -7   -1.50    1.50
 -12   7   9   16.90    3.10
  12   7  -9   23.50    3.30
  12   7  -8   -3.30    1.90
 -12   7   8    0.00    2.20
  12   7  -7    4.50    2.00
 -12   7   7    7.40    2.30
 -12   7   6   -2.50    1.80
  12   7  -6    0.00    1.70
 -12   7   5    2.50    1.70
  12   7  -5    3.90    1.60
 -12   7   4    8.80    1.80
  12   7  -4    6.90    1.60
 -12   7   3    1.10    1.40
  12   7  -3    0.90    1.30
  12   7  -2    1.20    1.20
 -12   7   2    1.10    1.30
  12   7  -1    3.30    2.70
  12   7  -1    1.50    1.20
 -12   7   1    0.70    1.20
  12   7   0   40.80    3.40
 -12   7   0   44.20    3.20
  12   7   0   45.90    4.90
  12   7   1   15.20    3.50
  12   7   1    9.00    1.70
 -12   7  -1   12.20    1.60
  12   7   2   22.30    4.10
 -12   7  -2   14.00    1.70
  12   7   2   14.70    2.00
 -12   7  -3    1.70    1.30
  12   7   3    3.70    3.30
  12   7   3    1.20    1.50
  12   7   4    6.50    3.50
  12   7   4    5.00    1.90
  12   7   5    7.90    2.10
  12   7   5   11.70    3.90
  12   8  -2    0.70    3.20
  12   8  -1   17.70    4.10
  12   8   0   12.00    2.60
  12   8   0   13.60    3.70
  12   8   1    0.10    1.50
  12   8   1    3.60    3.40
  12   8   2    8.70    3.70
  12   8   2    3.00    1.60
  12   8   3   -1.00    1.60
  12   8   3    2.40    3.40
  12   9  -3    9.30    3.50
  12   9  -2    2.10    3.70
  12   9  -1   16.10    4.40
 -13   0  14   36.10    4.30
  13   0 -14   44.50    4.80
 -13   0  13   -3.60    2.90
  13   0 -13    1.10    3.00
 -13   0  12    1.20    2.70
  13   0 -12   -2.50    2.80
 -13   0  11   -3.80    2.40
  13   0 -11   -3.80    2.50
  13   0 -10   -1.40    2.30
 -13   0  10    2.80    2.20
 -13   0   9   -0.10    2.00
  13   0  -9   -2.10    2.20
  13   0  -8   18.10    2.60
 -13   0   8   14.60    2.20
  13   0  -7    2.20    2.00
 -13   0   7    0.20    1.70
  13   0  -6    9.50    2.00
 -13   0   6    7.30    1.80
 -13   0   5   -1.40    1.40
  13   0  -5   -1.60    1.60
  13   0  -4   72.59    4.70
 -13   0   4   74.19    4.50
  13   0  -3    0.10    1.40
 -13   0   3    0.10    1.20
 -13   0   2   66.19    4.20
  13   0  -2   73.79    4.40
 -13   0   1   -0.30    1.20
  13   0  -1   -0.70    1.20
  13   0   0  145.39    7.90
 -13   0   0  149.29    7.80
  13   0   0  147.09    7.70
 -13   0  -1   -0.70    1.10
  13   0   1    1.40    1.20
  13   0   1    1.40    1.40
 -13   0  -2   -3.30    1.20
  13   0   2    0.50    1.20
  13   0   2   -3.70    1.30
 -13   0  -3   -2.10    1.30
  13   0   3   -3.80    1.40
  13   0   3   -2.10    1.50
  13   0   4   13.30    2.00
  13   0   4   22.50    2.40
 -13   0  -4   16.00    2.00
  13   0   5   -1.80    1.50
 -13   0  -5   -2.00    1.30
  13   0   6    0.70    1.70
 -13   0  -6   -0.70    1.50
 -13   0  -7   -1.40    1.50
  13   0   7   -2.70    1.70
 -13   0  -8    1.10    1.90
  13   0   8    1.60    1.90
  13   0   9   -1.50    2.00
 -13   0  -9   -0.60    1.90
 -13   1  13    0.30    2.90
  13   1 -13   -0.60    3.10
  13  -1 -13   -1.40    2.90
 -13  -1  13    1.30    2.70
  13   1 -12    2.10    3.00
 -13   1  12    2.60    2.80
  13  -1 -12    3.10    3.00
 -13  -1  12    2.10    2.60
 -13   1  11   -4.00    2.50
  13   1 -11   -2.80    2.60
  13  -1 -11   -1.60    2.60
 -13  -1  11    1.00    2.40
  13   1 -10   35.70    3.60
 -13   1  10   30.10    3.40
 -13  -1  10   33.70    3.40
  13  -1 -10   30.50    3.60
  13   1  -9   39.10    3.60
 -13   1   9   30.50    3.30
 -13  -1   9   46.00    4.10
  13  -1  -9   38.00    3.60
 -13   1   8    0.30    2.00
  13   1  -8    1.00    2.10
  13  -1  -8    0.60    2.00
 -13  -1   8    2.10    1.90
  13   1  -7   30.20    2.80
 -13   1   7   20.80    2.60
  13  -1  -7   22.60    2.70
 -13  -1   7   28.80    2.70
 -13   1   6   73.09    4.90
  13   1  -6   77.19    5.00
  13  -1  -6   72.69    5.00
 -13  -1   6   72.49    4.90
 -13   1   5   24.80    2.50
  13   1  -5   34.70    3.20
 -13  -1   5   32.60    3.10
  13  -1  -5   31.10    3.20
 -13   1   4   78.39    4.70
  13   1  -4   75.59    4.80
  13  -1  -4   78.19    4.90
 -13  -1   4   72.79    4.70
 -13   1   3   12.90    1.70
  13   1  -3    6.80    1.50
  13  -1  -3    8.60    1.70
 -13  -1   3    9.80    1.60
  13   1  -2  170.98    9.50
 -13   1   2  192.48    9.50
  13  -1  -2  179.18    9.60
 -13  -1   2  186.88    9.50
  13   1  -1   98.69    5.60
 -13   1   1  102.19    5.50
  13  -1  -1   99.69    5.60
 -13  -1   1   84.59    5.40
  13   1   0   64.69    4.20
 -13   1   0   69.79    4.00
  13   1   0   64.29    4.10
 -13  -1   0   58.99    4.00
  13  -1   0   61.69    3.50
  13  -1   0   62.19    4.10
  13   1   1   52.09    3.70
 -13   1  -1   53.59    3.50
  13   1   1   55.19    3.80
 -13  -1  -1   47.20    3.50
  13  -1   1   56.19    3.70
  13  -1   1   47.60    2.80
  13   1   2  269.47   13.50
  13   1   2  236.08   13.40
 -13   1  -2  272.47   13.40
  13  -1   2  265.57   13.40
 -13  -1  -2  270.17   13.40
  13   1   3   62.39    4.30
  13   1   3   58.29    4.30
 -13   1  -3   61.09    4.10
  13  -1   3   61.89    4.20
 -13  -1  -3   62.19    4.10
 -13   1  -4    4.10    1.60
  13   1   4    9.70    2.20
  13   1   4    5.20    1.80
 -13  -1  -4    3.70    1.50
  13  -1   4    6.90    1.80
  13   1   5    9.70    2.40
  13   1   5    4.00    1.80
 -13   1  -5    5.40    1.60
 -13  -1  -5    3.80    1.60
  13  -1   5    6.10    1.70
 -13   1  -6    1.20    1.60
  13   1   6   -2.70    2.20
  13   1   6   -2.60    1.70
  13  -1   6    1.30    1.70
 -13  -1  -6    1.40    1.60
  13   1   7   -0.60    1.80
 -13   1  -7   -2.30    1.60
 -13  -1  -7   -0.40    1.70
  13  -1   7   -0.10    1.70
 -13   1  -8    4.70    2.10
  13   1   8    6.90    2.20
 -13  -1  -8    2.90    1.90
  13  -1   8    5.30    2.10
 -13   1  -9    0.50    2.10
  13   1   9   -1.20    2.10
  13  -1   9   -0.50    2.00
 -13  -1  -9   -2.20    1.90
  13   2 -13   -0.50    2.90
 -13   2  13    0.50    3.00
 -13  -2  13    1.80    2.60
  13  -2 -13   -3.40    2.90
  13   2 -12   -4.20    2.70
 -13   2  12   -1.40    2.60
 -13  -2  12   -1.10    2.40
  13  -2 -12    0.80    2.70
  13   2 -11   -0.60    2.50
 -13   2  11    0.60    2.50
  13  -2 -11    2.70    2.60
 -13  -2  11    0.20    2.30
 -13   2  10    7.20    2.60
  13   2 -10   10.00    2.70
 -13  -2  10    5.40    2.30
  13  -2 -10   10.00    2.60
 -13   2   9   59.09    5.00
  13   2  -9   60.29    5.10
  13  -2  -9   59.39    5.20
 -13  -2   9   64.39    4.90
  13   2  -8   75.29    5.50
 -13   2   8   75.09    5.50
  13  -2  -8   79.49    5.70
 -13  -2   8   81.19    5.50
 -13   2   7   10.10    2.30
  13   2  -7    8.80    2.10
 -13  -2   7   10.30    2.00
  13  -2  -7    7.90    2.20
 -13   2   6   31.40    2.80
  13   2  -6   25.50    2.70
  13  -2  -6   23.00    2.70
 -13  -2   6   29.20    2.60
 -13   2   5   49.90    3.70
  13   2  -5   48.20    3.80
 -13  -2   5   51.29    3.60
  13  -2  -5   51.59    3.90
  13  -2  -5   43.00    4.00
 -13   2   4   37.90    3.20
  13   2  -4   41.30    3.40
  13  -2  -4   39.40    3.50
 -13  -2   4   40.60    3.40
  13  -2  -4   42.50    3.50
  13   2  -3   -1.50    1.30
 -13   2   3   -0.70    1.20
  13  -2  -3   -3.00    1.50
  13  -2  -3   -0.50    1.40
 -13  -2   3   -3.80    1.20
  13   2  -2   31.50    2.90
 -13   2   2   33.90    2.80
 -13  -2   2   27.40    2.70
  13  -2  -2   33.60    3.10
  13  -2  -2   32.80    2.40
  13   2  -1   38.80    3.10
 -13   2   1   37.60    3.00
 -13  -2   1   41.60    3.00
  13  -2  -1   37.60    3.10
 -13   2   0   36.80    2.80
  13   2   0   34.10    3.00
  13  -2   0   31.80    3.10
 -13  -2   0   33.30    2.80
  13   2   1    3.30    1.50
  13   2   1    0.60    1.80
 -13   2  -1    2.30    1.20
 -13  -2  -1    3.40    1.30
  13  -2   1    3.30    1.50
  13   2   2  241.58   12.10
  13   2   2  234.98   12.30
 -13   2  -2  215.78   11.90
 -13  -2  -2  226.68   11.90
  13  -2   2  244.58   12.00
 -13   2  -3    1.70    1.30
  13   2   3    1.30    1.40
  13   2   3    0.50    1.90
  13  -2   3    1.00    1.40
 -13  -2  -3    0.40    1.30
  13   2   4    3.50    2.10
  13   2   4    0.90    1.60
 -13   2  -4    0.30    1.40
 -13  -2  -4    1.00    1.40
  13  -2   4    1.90    1.60
 -13   2  -5   43.10    3.70
  13   2   5   37.00    3.80
  13   2   5   47.50    4.40
  13  -2   5   41.70    3.50
 -13  -2  -5   37.30    3.50
 -13   2  -6    1.50    1.70
  13   2   6    0.40    2.50
  13   2   6   -0.80    1.70
 -13  -2  -6   -0.20    1.60
  13  -2   6   -1.30    1.50
  13   2   7    9.70    3.20
 -13   2  -7    7.00    2.00
  13   2   7    8.10    2.20
 -13  -2  -7    6.90    1.90
  13  -2   7    6.40    1.90
  13   2   8   -1.40    2.10
 -13   2  -8    3.60    2.10
 -13  -2  -8   -2.10    1.70
  13  -2   8   -0.60    1.80
  13   2   9    6.60    2.30
 -13   2  -9    4.40    2.30
 -13  -2  -9    3.60    2.00
  13  -2   9    2.50    2.10
  13   3 -13    0.50    3.10
 -13   3  13    4.20    3.10
 -13  -3  13    5.40    2.50
  13  -3 -13    3.40    2.90
 -13   3  12   43.40    4.30
  13   3 -12   43.00    4.30
  13  -3 -12   38.10    4.00
 -13  -3  12   32.30    3.50
 -13   3  11    1.60    2.60
  13   3 -11    0.30    2.60
  13  -3 -11    0.40    2.40
 -13  -3  11    1.10    2.20
  13   3 -10    3.80    2.50
 -13   3  10    2.30    2.50
 -13  -3  10    0.20    2.00
  13  -3 -10    3.80    2.40
 -13   3   9    3.60    2.20
  13   3  -9    1.80    2.30
 -13  -3   9    4.90    2.10
  13  -3  -9    5.70    2.30
  13   3  -8   65.79    5.20
 -13   3   8   60.29    5.00
  13  -3  -8   68.69    5.20
 -13  -3   8   71.09    4.90
  13   3  -7   19.80    2.50
 -13   3   7   17.20    2.50
  13  -3  -7   18.20    2.50
 -13  -3   7   17.40    2.30
  13   3  -6   -1.10    1.60
 -13   3   6   -2.50    1.60
 -13  -3   6    0.30    1.60
  13  -3  -6   -3.00    1.80
 -13   3   5    4.90    1.70
  13   3  -5    3.40    1.60
  13  -3  -5    7.80    2.00
  13  -3  -5    4.60    1.90
 -13  -3   5    3.30    1.70
  13   3  -4   74.69    4.80
 -13   3   4   71.49    4.70
  13  -3  -4   79.99    4.70
  13  -3  -4   80.99    5.10
 -13  -3   4   76.29    4.80
 -13   3   3   20.80    2.10
  13   3  -3   29.10    2.80
  13  -3  -3   29.80    2.20
 -13  -3   3   29.10    2.80
  13  -3  -3   23.10    2.40
 -13   3   2    2.00    1.30
  13   3  -2    0.90    1.20
 -13  -3   2    1.00    1.30
  13  -3  -2    3.40    0.70
  13  -3  -2    0.10    1.50
  13   3  -1    6.50    1.50
 -13   3   1    6.40    1.30
 -13  -3   1    5.30    1.40
  13  -3  -1    5.00    1.50
  13   3   0   -0.30    1.30
 -13   3   0    0.90    1.10
  13   3   0   -0.40    1.90
  13  -3   0   -0.20    1.30
 -13  -3   0    0.50    1.30
  13   3   1   -0.90    1.30
  13   3   1   -1.60    1.90
 -13   3  -1   -0.80    1.10
  13  -3   1    2.30    1.40
 -13  -3  -1   -0.20    1.20
 -13   3  -2    4.50    1.30
  13   3   2    5.20    1.50
  13   3   2    6.40    2.30
  13  -3   2    5.50    1.50
 -13  -3  -2    5.70    1.40
 -13   3  -3    3.40    1.40
  13   3   3    4.70    2.30
  13   3   3    5.00    1.70
 -13  -3  -3    5.80    1.50
  13  -3   3    4.70    1.50
  13   3   4    3.00    2.40
  13   3   4   -0.10    1.50
 -13   3  -4    1.00    1.40
 -13  -3  -4    1.70    1.40
  13  -3   4    0.80    1.50
  13   3   5   -1.30    1.70
 -13   3  -5    0.60    1.50
  13   3   5    4.20    2.60
  13  -3   5   -0.50    1.50
 -13  -3  -5    0.60    1.40
  13   3   6    1.30    1.80
 -13   3  -6    2.00    1.60
  13   3   6    2.50    2.90
  13  -3   6    1.20    1.70
 -13  -3  -6    2.10    1.60
  13   3   7   17.40    2.60
  13   3   7   13.30    3.70
 -13   3  -7   15.00    2.30
  13  -3   7   14.70    2.20
 -13  -3  -7   15.40    2.30
  13   3   8    0.20    2.20
 -13   3  -8   -2.70    2.00
  13   3   8   -0.80    3.40
 -13  -3  -8    1.40    1.90
  13  -3   8   -0.20    1.80
 -13   4  12    9.90    3.20
  13   4 -12    6.50    3.00
  13  -4 -12    7.50    2.70
 -13  -4  12   10.60    2.40
 -13   4  11   12.70    3.10
  13   4 -11    3.80    2.70
 -13  -4  11    7.70    2.20
  13  -4 -11    9.00    2.70
  13   4 -10    7.10    2.60
 -13   4  10    4.40    2.50
  13  -4 -10    4.10    2.30
 -13  -4  10    3.60    2.00
 -13   4   9    2.80    2.30
  13   4  -9    5.70    2.40
  13  -4  -9    3.00    2.20
 -13  -4   9    4.20    1.90
  13   4  -8   -0.50    2.00
 -13   4   8   -1.90    2.10
 -13  -4   8    1.30    1.80
  13  -4  -8   -3.10    2.00
 -13   4   7    5.30    2.00
  13   4  -7    3.80    1.90
 -13  -4   7    5.40    1.80
  13  -4  -7    7.20    2.10
 -13   4   6   39.80    3.60
  13   4  -6   37.40    3.60
 -13  -4   6   36.50    3.40
  13  -4  -6   41.00    3.70
 -13   4   5   17.70    2.30
  13   4  -5   15.10    2.10
  13  -4  -5   24.40    2.50
  13  -4  -5   20.60    2.30
 -13  -4   5   21.10    2.10
  13   4  -4    4.40    1.50
 -13   4   4    0.90    1.40
 -13  -4   4    2.20    1.50
  13  -4  -4    6.70    1.40
  13  -4  -4    2.70    1.70
  13   4  -3    1.00    1.30
 -13   4   3    1.80    1.30
  13  -4  -3    1.30    1.50
 -13  -4   3    3.90    1.40
 -13   4   2   44.80    3.30
  13   4  -2   45.10    3.50
 -13  -4   2   46.90    3.30
  13  -4  -2   47.00    3.50
  13  -4  -2   45.60    3.00
  13   4  -1   37.80    3.00
 -13   4   1   31.90    2.80
 -13  -4   1   29.90    2.70
  13  -4  -1   28.90    2.90
  13  -4  -1   32.70    2.40
  13   4   0    2.90    2.20
  13   4   0    0.30    1.30
 -13   4   0    4.00    1.30
  13  -4   0    2.10    1.40
  13  -4   0    1.90    1.00
 -13  -4   0    2.10    1.30
  13   4   1    7.70    2.50
 -13   4  -1    4.60    1.30
  13   4   1    6.50    1.50
  13  -4   1    5.50    1.40
  13  -4   1    4.20    1.50
 -13  -4  -1    5.40    1.40
  13   4   2   19.00    3.10
  13   4   2    9.30    1.70
 -13   4  -2    9.10    1.60
 -13  -4  -2   11.60    1.70
  13  -4   2   12.20    1.70
  13   4   3    1.70    2.40
  13   4   3   -0.90    1.40
 -13   4  -3   -1.10    1.30
  13  -4   3   -0.40    1.30
 -13  -4  -3    0.00    1.30
  13   4   4    2.80    2.60
 -13   4  -4   -0.90    1.30
  13   4   4   -0.40    1.60
 -13  -4  -4   -1.50    1.30
  13  -4   4    1.70    1.50
  13   4   5    2.10    2.80
 -13   4  -5   -1.20    1.50
  13   4   5    2.00    1.80
  13  -4   5   -1.20    1.50
 -13  -4  -5    1.60    1.40
 -13   4  -6    2.20    1.80
  13   4   6   -0.40    1.90
  13   4   6    4.50    3.10
 -13  -4  -6    1.40    1.60
  13  -4   6    1.10    1.60
 -13   4  -7    0.30    1.90
  13   4   7    0.30    3.20
  13   4   7    0.30    2.30
 -13  -4  -7   -2.20    1.60
  13  -4   7   -0.40    1.70
  13   4   8   11.50    2.70
 -13   4  -8    7.20    2.30
  13   4   8    2.20    3.70
 -13  -4  -8    5.60    2.00
  13  -4   8    4.40    2.00
 -13   5  11   -0.70    2.80
  13   5 -11   -1.70    2.60
 -13  -5  11   -2.90    1.60
  13  -5 -11    0.20    2.30
  13   5 -10   -0.30    2.40
[truncated: 90,818 more chars]
